# Supplementary material
Source: MDPI journal article supplement (https://www.mdpi.com/1996-1073/9/1/14)
Supplement: s1 [file s1]

<?xml version="1.0" encoding="UTF-8"?><kml xmlns="http://www.opengis.net/kml/2.2"><Document>
<name>Gas flaring summary by flare</name>
<Placemark>
<Style id="highlightPlacemark1">
<IconStyle>
<scale>1</scale>
<Icon>
<href>http://maps.google.com/mapfiles/ms/micons/red.png</href>
</Icon>
</IconStyle>
<LabelStyle>
<scale>1</scale>
</LabelStyle>
</Style>
<name>Rank 1</name>
<description><![CDATA[  <table width="500">
<tr><td>Country: <b>VEN</b></td><td>Flare ID: <b>vnfdb_2012_05982</b></td></tr>
<tr><td colspan="2">Combustion parameters:</td></tr>
<tr><td>Lat=9.644952, Lon=-63.563166 deg.</td><td>Tavg=1733.7 K, RHsum=37.0622 MW</td></tr>
<tr><td>Freq. detect.=100.00 %</td><td>Area=438.97 m2</td></tr>
<tr><td>BCM=1.02</td><td>Type: upstream</td></tr>
</table>]]></description><Point>
<coordinates>-63.563166,9.644952,0</coordinates>
</Point>
</Placemark>
<Placemark>
<Style id="highlightPlacemark2">
<IconStyle>
<scale>1</scale>
<Icon>
<href>http://maps.google.com/mapfiles/ms/micons/red.png</href>
</Icon>
</IconStyle>
<LabelStyle>
<scale>1</scale>
</LabelStyle>
</Style>
<name>Rank 2</name>
<description><![CDATA[  <table width="500">
<tr><td>Country: <b>RUS</b></td><td>Flare ID: <b>vnfdb_2012_11087</b></td></tr>
<tr><td colspan="2">Combustion parameters:</td></tr>
<tr><td>Lat=67.711830, Lon=83.472641 deg.</td><td>Tavg=1832.51 K, RHsum=36.5273 MW</td></tr>
<tr><td>Freq. detect.=96.49 %</td><td>Area=372.64 m2</td></tr>
<tr><td>BCM=1</td><td>Type: upstream</td></tr>
</table>]]></description><Point>
<coordinates>83.472641,67.711830,0</coordinates>
</Point>
</Placemark>
<Placemark>
<Style id="highlightPlacemark3">
<IconStyle>
<scale>1</scale>
<Icon>
<href>http://maps.google.com/mapfiles/ms/micons/red.png</href>
</Icon>
</IconStyle>
<LabelStyle>
<scale>1</scale>
</LabelStyle>
</Style>
<name>Rank 3</name>
<description><![CDATA[  <table width="500">
<tr><td>Country: <b>VEN</b></td><td>Flare ID: <b>vnfdb_2012_05977</b></td></tr>
<tr><td colspan="2">Combustion parameters:</td></tr>
<tr><td>Lat=9.651702, Lon=-63.625738 deg.</td><td>Tavg=1732.24 K, RHsum=29.7098 MW</td></tr>
<tr><td>Freq. detect.=100.00 %</td><td>Area=356.44 m2</td></tr>
<tr><td>BCM=0.814</td><td>Type: upstream</td></tr>
</table>]]></description><Point>
<coordinates>-63.625738,9.651702,0</coordinates>
</Point>
</Placemark>
<Placemark>
<Style id="highlightPlacemark4">
<IconStyle>
<scale>1</scale>
<Icon>
<href>http://maps.google.com/mapfiles/ms/micons/red.png</href>
</Icon>
</IconStyle>
<LabelStyle>
<scale>1</scale>
</LabelStyle>
</Style>
<name>Rank 4</name>
<description><![CDATA[  <table width="500">
<tr><td>Country: <b>IRN</b></td><td>Flare ID: <b>vnfdb_2012_09065</b></td></tr>
<tr><td colspan="2">Combustion parameters:</td></tr>
<tr><td>Lat=28.494874, Lon=49.713330 deg.</td><td>Tavg=1659.79 K, RHsum=29.0809 MW</td></tr>
<tr><td>Freq. detect.=94.85 %</td><td>Area=355.63 m2</td></tr>
<tr><td>BCM=0.797</td><td>Type: upstream</td></tr>
</table>]]></description><Point>
<coordinates>49.713330,28.494874,0</coordinates>
</Point>
</Placemark>
<Placemark>
<Style id="highlightPlacemark5">
<IconStyle>
<scale>1</scale>
<Icon>
<href>http://maps.google.com/mapfiles/ms/micons/red.png</href>
</Icon>
</IconStyle>
<LabelStyle>
<scale>1</scale>
</LabelStyle>
</Style>
<name>Rank 5</name>
<description><![CDATA[  <table width="500">
<tr><td>Country: <b>VEN</b></td><td>Flare ID: <b>vnfdb_2012_05995</b></td></tr>
<tr><td colspan="2">Combustion parameters:</td></tr>
<tr><td>Lat=9.736246, Lon=-63.473733 deg.</td><td>Tavg=1794.68 K, RHsum=27.9976 MW</td></tr>
<tr><td>Freq. detect.=98.46 %</td><td>Area=227.98 m2</td></tr>
<tr><td>BCM=0.767</td><td>Type: upstream</td></tr>
</table>]]></description><Point>
<coordinates>-63.473733,9.736246,0</coordinates>
</Point>
</Placemark>
<Placemark>
<Style id="highlightPlacemark6">
<IconStyle>
<scale>1</scale>
<Icon>
<href>http://maps.google.com/mapfiles/ms/micons/red.png</href>
</Icon>
</IconStyle>
<LabelStyle>
<scale>1</scale>
</LabelStyle>
</Style>
<name>Rank 6</name>
<description><![CDATA[  <table width="500">
<tr><td>Country: <b>IRQ</b></td><td>Flare ID: <b>vnfdb_2012_08633</b></td></tr>
<tr><td colspan="2">Combustion parameters:</td></tr>
<tr><td>Lat=32.489500, Lon=45.661198 deg.</td><td>Tavg=1664.3 K, RHsum=21.3317 MW</td></tr>
<tr><td>Freq. detect.=96.81 %</td><td>Area=234.88 m2</td></tr>
<tr><td>BCM=0.584</td><td>Type: upstream</td></tr>
</table>]]></description><Point>
<coordinates>45.661198,32.489500,0</coordinates>
</Point>
</Placemark>
<Placemark>
<Style id="highlightPlacemark7">
<IconStyle>
<scale>1</scale>
<Icon>
<href>http://maps.google.com/mapfiles/ms/micons/red.png</href>
</Icon>
</IconStyle>
<LabelStyle>
<scale>1</scale>
</LabelStyle>
</Style>
<name>Rank 7</name>
<description><![CDATA[  <table width="500">
<tr><td>Country: <b>RUS</b></td><td>Flare ID: <b>vnfdb_2012_11275</b></td></tr>
<tr><td colspan="2">Combustion parameters:</td></tr>
<tr><td>Lat=60.147577, Lon=109.098347 deg.</td><td>Tavg=1750.04 K, RHsum=21.0849 MW</td></tr>
<tr><td>Freq. detect.=96.41 %</td><td>Area=172.15 m2</td></tr>
<tr><td>BCM=0.578</td><td>Type: upstream</td></tr>
</table>]]></description><Point>
<coordinates>109.098347,60.147577,0</coordinates>
</Point>
</Placemark>
<Placemark>
<Style id="highlightPlacemark8">
<IconStyle>
<scale>1</scale>
<Icon>
<href>http://maps.google.com/mapfiles/ms/micons/red.png</href>
</Icon>
</IconStyle>
<LabelStyle>
<scale>1</scale>
</LabelStyle>
</Style>
<name>Rank 8</name>
<description><![CDATA[  <table width="500">
<tr><td>Country: <b>KAZ</b></td><td>Flare ID: <b>vnfdb_2012_07618</b></td></tr>
<tr><td colspan="2">Combustion parameters:</td></tr>
<tr><td>Lat=47.880664, Lon=57.460718 deg.</td><td>Tavg=1708.2 K, RHsum=21.0008 MW</td></tr>
<tr><td>Freq. detect.=98.48 %</td><td>Area=207.17 m2</td></tr>
<tr><td>BCM=0.575</td><td>Type: upstream</td></tr>
</table>]]></description><Point>
<coordinates>57.460718,47.880664,0</coordinates>
</Point>
</Placemark>
<Placemark>
<Style id="highlightPlacemark9">
<IconStyle>
<scale>1</scale>
<Icon>
<href>http://maps.google.com/mapfiles/kml/shapes/gas_stations.png</href>
</Icon>
</IconStyle>
<LabelStyle>
<scale>1</scale>
</LabelStyle>
</Style>
<name>Rank 9</name>
<description><![CDATA[  <table width="500">
<tr><td>Country: <b>DZA</b></td><td>Flare ID: <b>vnfdb_2012_07882</b></td></tr>
<tr><td colspan="2">Combustion parameters:</td></tr>
<tr><td>Lat=31.799894, Lon=6.054265 deg.</td><td>Tavg=1674.3 K, RHsum=18.9058 MW</td></tr>
<tr><td>Freq. detect.=98.23 %</td><td>Area=197.33 m2</td></tr>
<tr><td>BCM=0.518</td><td>Type: downstream</td></tr>
</table>]]></description><Point>
<coordinates>6.054265,31.799894,0</coordinates>
</Point>
</Placemark>
<Placemark>
<Style id="highlightPlacemark10">
<IconStyle>
<scale>1</scale>
<Icon>
<href>http://maps.google.com/mapfiles/ms/micons/red.png</href>
</Icon>
</IconStyle>
<LabelStyle>
<scale>1</scale>
</LabelStyle>
</Style>
<name>Rank 10</name>
<description><![CDATA[  <table width="500">
<tr><td>Country: <b>IRQ</b></td><td>Flare ID: <b>vnfdb_2012_08695</b></td></tr>
<tr><td colspan="2">Combustion parameters:</td></tr>
<tr><td>Lat=30.279005, Lon=47.359579 deg.</td><td>Tavg=1562.56 K, RHsum=18.0034 MW</td></tr>
<tr><td>Freq. detect.=98.40 %</td><td>Area=248.88 m2</td></tr>
<tr><td>BCM=0.493</td><td>Type: upstream</td></tr>
</table>]]></description><Point>
<coordinates>47.359579,30.279005,0</coordinates>
</Point>
</Placemark>
<Placemark>
<Style id="highlightPlacemark11">
<IconStyle>
<scale>1</scale>
<Icon>
<href>http://maps.google.com/mapfiles/ms/micons/red.png</href>
</Icon>
</IconStyle>
<LabelStyle>
<scale>1</scale>
</LabelStyle>
</Style>
<name>Rank 11</name>
<description><![CDATA[  <table width="500">
<tr><td>Country: <b>IRQ</b></td><td>Flare ID: <b>vnfdb_2012_08687</b></td></tr>
<tr><td colspan="2">Combustion parameters:</td></tr>
<tr><td>Lat=30.882915, Lon=47.331448 deg.</td><td>Tavg=1628.54 K, RHsum=16.7868 MW</td></tr>
<tr><td>Freq. detect.=97.24 %</td><td>Area=180.26 m2</td></tr>
<tr><td>BCM=0.46</td><td>Type: upstream</td></tr>
</table>]]></description><Point>
<coordinates>47.331448,30.882915,0</coordinates>
</Point>
</Placemark>
<Placemark>
<Style id="highlightPlacemark12">
<IconStyle>
<scale>1</scale>
<Icon>
<href>http://maps.google.com/mapfiles/ms/micons/red.png</href>
</Icon>
</IconStyle>
<LabelStyle>
<scale>1</scale>
</LabelStyle>
</Style>
<name>Rank 12</name>
<description><![CDATA[  <table width="500">
<tr><td>Country: <b>IRN</b></td><td>Flare ID: <b>vnfdb_2012_09284</b></td></tr>
<tr><td colspan="2">Combustion parameters:</td></tr>
<tr><td>Lat=27.512998, Lon=52.624343 deg.</td><td>Tavg=1706.12 K, RHsum=16.1508 MW</td></tr>
<tr><td>Freq. detect.=98.82 %</td><td>Area=146.92 m2</td></tr>
<tr><td>BCM=0.443</td><td>Type: upstream</td></tr>
</table>]]></description><Point>
<coordinates>52.624343,27.512998,0</coordinates>
</Point>
</Placemark>
<Placemark>
<Style id="highlightPlacemark13">
<IconStyle>
<scale>1</scale>
<Icon>
<href>http://maps.google.com/mapfiles/ms/micons/red.png</href>
</Icon>
</IconStyle>
<LabelStyle>
<scale>1</scale>
</LabelStyle>
</Style>
<name>Rank 13</name>
<description><![CDATA[  <table width="500">
<tr><td>Country: <b>IRN</b></td><td>Flare ID: <b>vnfdb_2012_09307</b></td></tr>
<tr><td colspan="2">Combustion parameters:</td></tr>
<tr><td>Lat=25.533126, Lon=53.147626 deg.</td><td>Tavg=1649.12 K, RHsum=16.1324 MW</td></tr>
<tr><td>Freq. detect.=93.05 %</td><td>Area=163.13 m2</td></tr>
<tr><td>BCM=0.442</td><td>Type: upstream</td></tr>
</table>]]></description><Point>
<coordinates>53.147626,25.533126,0</coordinates>
</Point>
</Placemark>
<Placemark>
<Style id="highlightPlacemark14">
<IconStyle>
<scale>1</scale>
<Icon>
<href>http://maps.google.com/mapfiles/ms/micons/red.png</href>
</Icon>
</IconStyle>
<LabelStyle>
<scale>1</scale>
</LabelStyle>
</Style>
<name>Rank 14</name>
<description><![CDATA[  <table width="500">
<tr><td>Country: <b>NGA</b></td><td>Flare ID: <b>vnfdb_2012_09646</b></td></tr>
<tr><td colspan="2">Combustion parameters:</td></tr>
<tr><td>Lat=3.576108, Lon=7.393371 deg.</td><td>Tavg=1717.88 K, RHsum=16.0453 MW</td></tr>
<tr><td>Freq. detect.=94.68 %</td><td>Area=127.10 m2</td></tr>
<tr><td>BCM=0.44</td><td>Type: upstream</td></tr>
</table>]]></description><Point>
<coordinates>7.393371,3.576108,0</coordinates>
</Point>
</Placemark>
<Placemark>
<Style id="highlightPlacemark15">
<IconStyle>
<scale>1</scale>
<Icon>
<href>http://maps.google.com/mapfiles/ms/micons/red.png</href>
</Icon>
</IconStyle>
<LabelStyle>
<scale>1</scale>
</LabelStyle>
</Style>
<name>Rank 15</name>
<description><![CDATA[  <table width="500">
<tr><td>Country: <b>RUS</b></td><td>Flare ID: <b>vnfdb_2012_10366</b></td></tr>
<tr><td colspan="2">Combustion parameters:</td></tr>
<tr><td>Lat=61.313187, Lon=70.291844 deg.</td><td>Tavg=1694.9 K, RHsum=16.0079 MW</td></tr>
<tr><td>Freq. detect.=84.92 %</td><td>Area=167.37 m2</td></tr>
<tr><td>BCM=0.439</td><td>Type: upstream</td></tr>
</table>]]></description><Point>
<coordinates>70.291844,61.313187,0</coordinates>
</Point>
</Placemark>
<Placemark>
<Style id="highlightPlacemark16">
<IconStyle>
<scale>1</scale>
<Icon>
<href>http://maps.google.com/mapfiles/ms/micons/red.png</href>
</Icon>
</IconStyle>
<LabelStyle>
<scale>1</scale>
</LabelStyle>
</Style>
<name>Rank 16</name>
<description><![CDATA[  <table width="500">
<tr><td>Country: <b>VEN</b></td><td>Flare ID: <b>vnfdb_2012_05963</b></td></tr>
<tr><td colspan="2">Combustion parameters:</td></tr>
<tr><td>Lat=9.621287, Lon=-63.724221 deg.</td><td>Tavg=1754.03 K, RHsum=15.6779 MW</td></tr>
<tr><td>Freq. detect.=98.00 %</td><td>Area=114.67 m2</td></tr>
<tr><td>BCM=0.43</td><td>Type: upstream</td></tr>
</table>]]></description><Point>
<coordinates>-63.724221,9.621287,0</coordinates>
</Point>
</Placemark>
<Placemark>
<Style id="highlightPlacemark17">
<IconStyle>
<scale>1</scale>
<Icon>
<href>http://maps.google.com/mapfiles/ms/micons/red.png</href>
</Icon>
</IconStyle>
<LabelStyle>
<scale>1</scale>
</LabelStyle>
</Style>
<name>Rank 17</name>
<description><![CDATA[  <table width="500">
<tr><td>Country: <b>KAZ</b></td><td>Flare ID: <b>vnfdb_2012_07606</b></td></tr>
<tr><td colspan="2">Combustion parameters:</td></tr>
<tr><td>Lat=48.234756, Lon=57.350887 deg.</td><td>Tavg=1774.77 K, RHsum=15.476 MW</td></tr>
<tr><td>Freq. detect.=97.22 %</td><td>Area=104.62 m2</td></tr>
<tr><td>BCM=0.424</td><td>Type: upstream</td></tr>
</table>]]></description><Point>
<coordinates>57.350887,48.234756,0</coordinates>
</Point>
</Placemark>
<Placemark>
<Style id="highlightPlacemark18">
<IconStyle>
<scale>1</scale>
<Icon>
<href>http://maps.google.com/mapfiles/ms/micons/red.png</href>
</Icon>
</IconStyle>
<LabelStyle>
<scale>1</scale>
</LabelStyle>
</Style>
<name>Rank 18</name>
<description><![CDATA[  <table width="500">
<tr><td>Country: <b>IRQ</b></td><td>Flare ID: <b>vnfdb_2012_08693</b></td></tr>
<tr><td colspan="2">Combustion parameters:</td></tr>
<tr><td>Lat=30.357889, Lon=47.336862 deg.</td><td>Tavg=1625.64 K, RHsum=15.3054 MW</td></tr>
<tr><td>Freq. detect.=97.68 %</td><td>Area=157.44 m2</td></tr>
<tr><td>BCM=0.419</td><td>Type: upstream</td></tr>
</table>]]></description><Point>
<coordinates>47.336862,30.357889,0</coordinates>
</Point>
</Placemark>
<Placemark>
<Style id="highlightPlacemark19">
<IconStyle>
<scale>1</scale>
<Icon>
<href>http://maps.google.com/mapfiles/ms/micons/red.png</href>
</Icon>
</IconStyle>
<LabelStyle>
<scale>1</scale>
</LabelStyle>
</Style>
<name>Rank 19</name>
<description><![CDATA[  <table width="500">
<tr><td>Country: <b>RUS</b></td><td>Flare ID: <b>vnfdb_2012_11095</b></td></tr>
<tr><td colspan="2">Combustion parameters:</td></tr>
<tr><td>Lat=67.793949, Lon=83.532727 deg.</td><td>Tavg=1800.38 K, RHsum=15.2892 MW</td></tr>
<tr><td>Freq. detect.=93.34 %</td><td>Area=136.19 m2</td></tr>
<tr><td>BCM=0.419</td><td>Type: upstream</td></tr>
</table>]]></description><Point>
<coordinates>83.532727,67.793949,0</coordinates>
</Point>
</Placemark>
<Placemark>
<Style id="highlightPlacemark20">
<IconStyle>
<scale>1</scale>
<Icon>
<href>http://maps.google.com/mapfiles/ms/micons/red.png</href>
</Icon>
</IconStyle>
<LabelStyle>
<scale>1</scale>
</LabelStyle>
</Style>
<name>Rank 20</name>
<description><![CDATA[  <table width="500">
<tr><td>Country: <b>IRQ</b></td><td>Flare ID: <b>vnfdb_2012_08699</b></td></tr>
<tr><td colspan="2">Combustion parameters:</td></tr>
<tr><td>Lat=30.166091, Lon=47.412578 deg.</td><td>Tavg=1636.29 K, RHsum=15.1129 MW</td></tr>
<tr><td>Freq. detect.=97.03 %</td><td>Area=161.80 m2</td></tr>
<tr><td>BCM=0.414</td><td>Type: upstream</td></tr>
</table>]]></description><Point>
<coordinates>47.412578,30.166091,0</coordinates>
</Point>
</Placemark>
<Placemark>
<Style id="highlightPlacemark21">
<IconStyle>
<scale>1</scale>
<Icon>
<href>http://maps.google.com/mapfiles/ms/micons/red.png</href>
</Icon>
</IconStyle>
<LabelStyle>
<scale>1</scale>
</LabelStyle>
</Style>
<name>Rank 21</name>
<description><![CDATA[  <table width="500">
<tr><td>Country: <b>IRQ</b></td><td>Flare ID: <b>vnfdb_2012_08696</b></td></tr>
<tr><td colspan="2">Combustion parameters:</td></tr>
<tr><td>Lat=30.212080, Lon=47.392675 deg.</td><td>Tavg=1600.7 K, RHsum=15.0257 MW</td></tr>
<tr><td>Freq. detect.=98.79 %</td><td>Area=178.60 m2</td></tr>
<tr><td>BCM=0.412</td><td>Type: upstream</td></tr>
</table>]]></description><Point>
<coordinates>47.392675,30.212080,0</coordinates>
</Point>
</Placemark>
<Placemark>
<Style id="highlightPlacemark22">
<IconStyle>
<scale>1</scale>
<Icon>
<href>http://maps.google.com/mapfiles/ms/micons/red.png</href>
</Icon>
</IconStyle>
<LabelStyle>
<scale>1</scale>
</LabelStyle>
</Style>
<name>Rank 22</name>
<description><![CDATA[  <table width="500">
<tr><td>Country: <b>IRN</b></td><td>Flare ID: <b>vnfdb_2012_09281</b></td></tr>
<tr><td colspan="2">Combustion parameters:</td></tr>
<tr><td>Lat=27.541579, Lon=52.585510 deg.</td><td>Tavg=1729.91 K, RHsum=14.9842 MW</td></tr>
<tr><td>Freq. detect.=99.02 %</td><td>Area=125.30 m2</td></tr>
<tr><td>BCM=0.411</td><td>Type: upstream</td></tr>
</table>]]></description><Point>
<coordinates>52.585510,27.541579,0</coordinates>
</Point>
</Placemark>
<Placemark>
<Style id="highlightPlacemark23">
<IconStyle>
<scale>1</scale>
<Icon>
<href>http://maps.google.com/mapfiles/ms/micons/red.png</href>
</Icon>
</IconStyle>
<LabelStyle>
<scale>1</scale>
</LabelStyle>
</Style>
<name>Rank 23</name>
<description><![CDATA[  <table width="500">
<tr><td>Country: <b>IRQ</b></td><td>Flare ID: <b>vnfdb_2012_08689</b></td></tr>
<tr><td colspan="2">Combustion parameters:</td></tr>
<tr><td>Lat=30.764384, Lon=47.326524 deg.</td><td>Tavg=1601.73 K, RHsum=14.8896 MW</td></tr>
<tr><td>Freq. detect.=96.77 %</td><td>Area=183.52 m2</td></tr>
<tr><td>BCM=0.408</td><td>Type: upstream</td></tr>
</table>]]></description><Point>
<coordinates>47.326524,30.764384,0</coordinates>
</Point>
</Placemark>
<Placemark>
<Style id="highlightPlacemark24">
<IconStyle>
<scale>1</scale>
<Icon>
<href>http://maps.google.com/mapfiles/ms/micons/red.png</href>
</Icon>
</IconStyle>
<LabelStyle>
<scale>1</scale>
</LabelStyle>
</Style>
<name>Rank 24</name>
<description><![CDATA[  <table width="500">
<tr><td>Country: <b>AGO</b></td><td>Flare ID: <b>vnfdb_2012_09903</b></td></tr>
<tr><td colspan="2">Combustion parameters:</td></tr>
<tr><td>Lat=-6.857446, Lon=12.393023 deg.</td><td>Tavg=1664.72 K, RHsum=14.7713 MW</td></tr>
<tr><td>Freq. detect.=91.03 %</td><td>Area=128.31 m2</td></tr>
<tr><td>BCM=0.405</td><td>Type: upstream</td></tr>
</table>]]></description><Point>
<coordinates>12.393023,-6.857446,0</coordinates>
</Point>
</Placemark>
<Placemark>
<Style id="highlightPlacemark25">
<IconStyle>
<scale>1</scale>
<Icon>
<href>http://maps.google.com/mapfiles/ms/micons/red.png</href>
</Icon>
</IconStyle>
<LabelStyle>
<scale>1</scale>
</LabelStyle>
</Style>
<name>Rank 25</name>
<description><![CDATA[  <table width="500">
<tr><td>Country: <b>IRQ</b></td><td>Flare ID: <b>vnfdb_2012_08686</b></td></tr>
<tr><td colspan="2">Combustion parameters:</td></tr>
<tr><td>Lat=30.610382, Lon=47.325957 deg.</td><td>Tavg=1687.87 K, RHsum=14.5074 MW</td></tr>
<tr><td>Freq. detect.=98.36 %</td><td>Area=124.27 m2</td></tr>
<tr><td>BCM=0.398</td><td>Type: upstream</td></tr>
</table>]]></description><Point>
<coordinates>47.325957,30.610382,0</coordinates>
</Point>
</Placemark>
<Placemark>
<Style id="highlightPlacemark26">
<IconStyle>
<scale>1</scale>
<Icon>
<href>http://maps.google.com/mapfiles/ms/micons/red.png</href>
</Icon>
</IconStyle>
<LabelStyle>
<scale>1</scale>
</LabelStyle>
</Style>
<name>Rank 26</name>
<description><![CDATA[  <table width="500">
<tr><td>Country: <b>AGO</b></td><td>Flare ID: <b>vnfdb_2012_09853</b></td></tr>
<tr><td colspan="2">Combustion parameters:</td></tr>
<tr><td>Lat=-5.417606, Lon=11.665308 deg.</td><td>Tavg=1806.61 K, RHsum=14.3746 MW</td></tr>
<tr><td>Freq. detect.=99.41 %</td><td>Area=92.33 m2</td></tr>
<tr><td>BCM=0.394</td><td>Type: upstream</td></tr>
</table>]]></description><Point>
<coordinates>11.665308,-5.417606,0</coordinates>
</Point>
</Placemark>
<Placemark>
<Style id="highlightPlacemark27">
<IconStyle>
<scale>1</scale>
<Icon>
<href>http://maps.google.com/mapfiles/kml/shapes/gas_stations.png</href>
</Icon>
</IconStyle>
<LabelStyle>
<scale>1</scale>
</LabelStyle>
</Style>
<name>Rank 27</name>
<description><![CDATA[  <table width="500">
<tr><td>Country: <b>DZA</b></td><td>Flare ID: <b>vnfdb_2012_07884</b></td></tr>
<tr><td colspan="2">Combustion parameters:</td></tr>
<tr><td>Lat=31.663914, Lon=6.056289 deg.</td><td>Tavg=1660.41 K, RHsum=13.9759 MW</td></tr>
<tr><td>Freq. detect.=100.00 %</td><td>Area=140.77 m2</td></tr>
<tr><td>BCM=0.383</td><td>Type: downstream</td></tr>
</table>]]></description><Point>
<coordinates>6.056289,31.663914,0</coordinates>
</Point>
</Placemark>
<Placemark>
<Style id="highlightPlacemark28">
<IconStyle>
<scale>1</scale>
<Icon>
<href>http://maps.google.com/mapfiles/ms/micons/red.png</href>
</Icon>
</IconStyle>
<LabelStyle>
<scale>1</scale>
</LabelStyle>
</Style>
<name>Rank 28</name>
<description><![CDATA[  <table width="500">
<tr><td>Country: <b>TKM</b></td><td>Flare ID: <b>vnfdb_2012_09310</b></td></tr>
<tr><td colspan="2">Combustion parameters:</td></tr>
<tr><td>Lat=39.398971, Lon=53.186295 deg.</td><td>Tavg=1681.6 K, RHsum=13.9214 MW</td></tr>
<tr><td>Freq. detect.=95.47 %</td><td>Area=123.09 m2</td></tr>
<tr><td>BCM=0.381</td><td>Type: upstream</td></tr>
</table>]]></description><Point>
<coordinates>53.186295,39.398971,0</coordinates>
</Point>
</Placemark>
<Placemark>
<Style id="highlightPlacemark29">
<IconStyle>
<scale>1</scale>
<Icon>
<href>http://maps.google.com/mapfiles/ms/micons/red.png</href>
</Icon>
</IconStyle>
<LabelStyle>
<scale>1</scale>
</LabelStyle>
</Style>
<name>Rank 29</name>
<description><![CDATA[  <table width="500">
<tr><td>Country: <b>IRQ</b></td><td>Flare ID: <b>vnfdb_2012_08690</b></td></tr>
<tr><td colspan="2">Combustion parameters:</td></tr>
<tr><td>Lat=30.688288, Lon=47.329128 deg.</td><td>Tavg=1555.87 K, RHsum=13.9116 MW</td></tr>
<tr><td>Freq. detect.=97.40 %</td><td>Area=190.19 m2</td></tr>
<tr><td>BCM=0.381</td><td>Type: upstream</td></tr>
</table>]]></description><Point>
<coordinates>47.329128,30.688288,0</coordinates>
</Point>
</Placemark>
<Placemark>
<Style id="highlightPlacemark30">
<IconStyle>
<scale>1</scale>
<Icon>
<href>http://maps.google.com/mapfiles/ms/micons/red.png</href>
</Icon>
</IconStyle>
<LabelStyle>
<scale>1</scale>
</LabelStyle>
</Style>
<name>Rank 30</name>
<description><![CDATA[  <table width="500">
<tr><td>Country: <b>IRQ</b></td><td>Flare ID: <b>vnfdb_2012_08685</b></td></tr>
<tr><td colspan="2">Combustion parameters:</td></tr>
<tr><td>Lat=30.497121, Lon=47.312455 deg.</td><td>Tavg=1699.15 K, RHsum=13.8035 MW</td></tr>
<tr><td>Freq. detect.=98.01 %</td><td>Area=106.38 m2</td></tr>
<tr><td>BCM=0.378</td><td>Type: upstream</td></tr>
</table>]]></description><Point>
<coordinates>47.312455,30.497121,0</coordinates>
</Point>
</Placemark>
<Placemark>
<Style id="highlightPlacemark31">
<IconStyle>
<scale>1</scale>
<Icon>
<href>http://maps.google.com/mapfiles/kml/shapes/gas_stations.png</href>
</Icon>
</IconStyle>
<LabelStyle>
<scale>1</scale>
</LabelStyle>
</Style>
<name>Rank 31</name>
<description><![CDATA[  <table width="500">
<tr><td>Country: <b>IRQ</b></td><td>Flare ID: <b>vnfdb_2012_08604</b></td></tr>
<tr><td colspan="2">Combustion parameters:</td></tr>
<tr><td>Lat=35.530446, Lon=44.339540 deg.</td><td>Tavg=1691.35 K, RHsum=13.646 MW</td></tr>
<tr><td>Freq. detect.=99.72 %</td><td>Area=105.12 m2</td></tr>
<tr><td>BCM=0.374</td><td>Type: downstream</td></tr>
</table>]]></description><Point>
<coordinates>44.339540,35.530446,0</coordinates>
</Point>
</Placemark>
<Placemark>
<Style id="highlightPlacemark32">
<IconStyle>
<scale>1</scale>
<Icon>
<href>http://maps.google.com/mapfiles/ms/micons/red.png</href>
</Icon>
</IconStyle>
<LabelStyle>
<scale>1</scale>
</LabelStyle>
</Style>
<name>Rank 32</name>
<description><![CDATA[  <table width="500">
<tr><td>Country: <b>LBY</b></td><td>Flare ID: <b>vnfdb_2012_08197</b></td></tr>
<tr><td colspan="2">Combustion parameters:</td></tr>
<tr><td>Lat=28.910461, Lon=19.771711 deg.</td><td>Tavg=1637.19 K, RHsum=13.5009 MW</td></tr>
<tr><td>Freq. detect.=99.23 %</td><td>Area=141.92 m2</td></tr>
<tr><td>BCM=0.37</td><td>Type: upstream</td></tr>
</table>]]></description><Point>
<coordinates>19.771711,28.910461,0</coordinates>
</Point>
</Placemark>
<Placemark>
<Style id="highlightPlacemark33">
<IconStyle>
<scale>1</scale>
<Icon>
<href>http://maps.google.com/mapfiles/ms/micons/red.png</href>
</Icon>
</IconStyle>
<LabelStyle>
<scale>1</scale>
</LabelStyle>
</Style>
<name>Rank 33</name>
<description><![CDATA[  <table width="500">
<tr><td>Country: <b>IRQ</b></td><td>Flare ID: <b>vnfdb_2012_08688</b></td></tr>
<tr><td colspan="2">Combustion parameters:</td></tr>
<tr><td>Lat=30.826908, Lon=47.328849 deg.</td><td>Tavg=1703.98 K, RHsum=13.4919 MW</td></tr>
<tr><td>Freq. detect.=92.27 %</td><td>Area=113.63 m2</td></tr>
<tr><td>BCM=0.37</td><td>Type: upstream</td></tr>
</table>]]></description><Point>
<coordinates>47.328849,30.826908,0</coordinates>
</Point>
</Placemark>
<Placemark>
<Style id="highlightPlacemark34">
<IconStyle>
<scale>1</scale>
<Icon>
<href>http://maps.google.com/mapfiles/ms/micons/red.png</href>
</Icon>
</IconStyle>
<LabelStyle>
<scale>1</scale>
</LabelStyle>
</Style>
<name>Rank 34</name>
<description><![CDATA[  <table width="500">
<tr><td>Country: <b>KAZ</b></td><td>Flare ID: <b>vnfdb_2012_07616</b></td></tr>
<tr><td colspan="2">Combustion parameters:</td></tr>
<tr><td>Lat=48.326423, Lon=57.433703 deg.</td><td>Tavg=1735.05 K, RHsum=13.071 MW</td></tr>
<tr><td>Freq. detect.=96.37 %</td><td>Area=105.06 m2</td></tr>
<tr><td>BCM=0.358</td><td>Type: upstream</td></tr>
</table>]]></description><Point>
<coordinates>57.433703,48.326423,0</coordinates>
</Point>
</Placemark>
<Placemark>
<Style id="highlightPlacemark35">
<IconStyle>
<scale>1</scale>
<Icon>
<href>http://maps.google.com/mapfiles/kml/shapes/gas_stations.png</href>
</Icon>
</IconStyle>
<LabelStyle>
<scale>1</scale>
</LabelStyle>
</Style>
<name>Rank 35</name>
<description><![CDATA[  <table width="500">
<tr><td>Country: <b>IRN</b></td><td>Flare ID: <b>vnfdb_2012_09379</b></td></tr>
<tr><td colspan="2">Combustion parameters:</td></tr>
<tr><td>Lat=25.902545, Lon=54.533397 deg.</td><td>Tavg=1715.61 K, RHsum=12.9533 MW</td></tr>
<tr><td>Freq. detect.=96.58 %</td><td>Area=101.92 m2</td></tr>
<tr><td>BCM=0.355</td><td>Type: downstream</td></tr>
</table>]]></description><Point>
<coordinates>54.533397,25.902545,0</coordinates>
</Point>
</Placemark>
<Placemark>
<Style id="highlightPlacemark36">
<IconStyle>
<scale>1</scale>
<Icon>
<href>http://maps.google.com/mapfiles/ms/micons/red.png</href>
</Icon>
</IconStyle>
<LabelStyle>
<scale>1</scale>
</LabelStyle>
</Style>
<name>Rank 36</name>
<description><![CDATA[  <table width="500">
<tr><td>Country: <b>KAZ</b></td><td>Flare ID: <b>vnfdb_2012_07582</b></td></tr>
<tr><td colspan="2">Combustion parameters:</td></tr>
<tr><td>Lat=48.163803, Lon=57.147007 deg.</td><td>Tavg=1715.42 K, RHsum=12.9131 MW</td></tr>
<tr><td>Freq. detect.=97.00 %</td><td>Area=92.32 m2</td></tr>
<tr><td>BCM=0.354</td><td>Type: upstream</td></tr>
</table>]]></description><Point>
<coordinates>57.147007,48.163803,0</coordinates>
</Point>
</Placemark>
<Placemark>
<Style id="highlightPlacemark37">
<IconStyle>
<scale>1</scale>
<Icon>
<href>http://maps.google.com/mapfiles/ms/micons/red.png</href>
</Icon>
</IconStyle>
<LabelStyle>
<scale>1</scale>
</LabelStyle>
</Style>
<name>Rank 37</name>
<description><![CDATA[  <table width="500">
<tr><td>Country: <b>IRQ</b></td><td>Flare ID: <b>vnfdb_2012_08703</b></td></tr>
<tr><td colspan="2">Combustion parameters:</td></tr>
<tr><td>Lat=31.677404, Lon=47.436270 deg.</td><td>Tavg=1692.53 K, RHsum=12.8335 MW</td></tr>
<tr><td>Freq. detect.=94.81 %</td><td>Area=122.84 m2</td></tr>
<tr><td>BCM=0.352</td><td>Type: upstream</td></tr>
</table>]]></description><Point>
<coordinates>47.436270,31.677404,0</coordinates>
</Point>
</Placemark>
<Placemark>
<Style id="highlightPlacemark38">
<IconStyle>
<scale>1</scale>
<Icon>
<href>http://maps.google.com/mapfiles/ms/micons/red.png</href>
</Icon>
</IconStyle>
<LabelStyle>
<scale>1</scale>
</LabelStyle>
</Style>
<name>Rank 38</name>
<description><![CDATA[  <table width="500">
<tr><td>Country: <b>IRN</b></td><td>Flare ID: <b>vnfdb_2012_09429</b></td></tr>
<tr><td colspan="2">Combustion parameters:</td></tr>
<tr><td>Lat=26.852953, Lon=55.849290 deg.</td><td>Tavg=1767.49 K, RHsum=12.5929 MW</td></tr>
<tr><td>Freq. detect.=96.89 %</td><td>Area=73.96 m2</td></tr>
<tr><td>BCM=0.345</td><td>Type: upstream</td></tr>
</table>]]></description><Point>
<coordinates>55.849290,26.852953,0</coordinates>
</Point>
</Placemark>
<Placemark>
<Style id="highlightPlacemark39">
<IconStyle>
<scale>1</scale>
<Icon>
<href>http://maps.google.com/mapfiles/ms/micons/red.png</href>
</Icon>
</IconStyle>
<LabelStyle>
<scale>1</scale>
</LabelStyle>
</Style>
<name>Rank 39</name>
<description><![CDATA[  <table width="500">
<tr><td>Country: <b>IRQ</b></td><td>Flare ID: <b>vnfdb_2012_08590</b></td></tr>
<tr><td colspan="2">Combustion parameters:</td></tr>
<tr><td>Lat=35.487894, Lon=44.153887 deg.</td><td>Tavg=1739.47 K, RHsum=12.2354 MW</td></tr>
<tr><td>Freq. detect.=96.24 %</td><td>Area=78.03 m2</td></tr>
<tr><td>BCM=0.335</td><td>Type: upstream</td></tr>
</table>]]></description><Point>
<coordinates>44.153887,35.487894,0</coordinates>
</Point>
</Placemark>
<Placemark>
<Style id="highlightPlacemark40">
<IconStyle>
<scale>1</scale>
<Icon>
<href>http://maps.google.com/mapfiles/ms/micons/red.png</href>
</Icon>
</IconStyle>
<LabelStyle>
<scale>1</scale>
</LabelStyle>
</Style>
<name>Rank 40</name>
<description><![CDATA[  <table width="500">
<tr><td>Country: <b>IRQ</b></td><td>Flare ID: <b>vnfdb_2012_08579</b></td></tr>
<tr><td colspan="2">Combustion parameters:</td></tr>
<tr><td>Lat=35.685895, Lon=43.875614 deg.</td><td>Tavg=1677.99 K, RHsum=12.2097 MW</td></tr>
<tr><td>Freq. detect.=96.00 %</td><td>Area=90.15 m2</td></tr>
<tr><td>BCM=0.335</td><td>Type: upstream</td></tr>
</table>]]></description><Point>
<coordinates>43.875614,35.685895,0</coordinates>
</Point>
</Placemark>
<Placemark>
<Style id="highlightPlacemark41">
<IconStyle>
<scale>1</scale>
<Icon>
<href>http://maps.google.com/mapfiles/kml/shapes/firedept.png</href>
</Icon>
</IconStyle>
<LabelStyle>
<scale>1</scale>
</LabelStyle>
</Style>
<name>Rank 41</name>
<description><![CDATA[  <table width="500">
<tr><td>Country: <b>DZA</b></td><td>Flare ID: <b>vnfdb_2012_06439</b></td></tr>
<tr><td colspan="2">Combustion parameters:</td></tr>
<tr><td>Lat=35.809365, Lon=-0.256430 deg.</td><td>Tavg=1688.71 K, RHsum=12.1743 MW</td></tr>
<tr><td>Freq. detect.=100.00 %</td><td>Area=103.73 m2</td></tr>
<tr><td>BCM=0.334</td><td>Type: LNG</td></tr>
</table>]]></description><Point>
<coordinates>-0.256430,35.809365,0</coordinates>
</Point>
</Placemark>
<Placemark>
<Style id="highlightPlacemark42">
<IconStyle>
<scale>1</scale>
<Icon>
<href>http://maps.google.com/mapfiles/ms/micons/red.png</href>
</Icon>
</IconStyle>
<LabelStyle>
<scale>1</scale>
</LabelStyle>
</Style>
<name>Rank 42</name>
<description><![CDATA[  <table width="500">
<tr><td>Country: <b>NGA</b></td><td>Flare ID: <b>vnfdb_2012_09636</b></td></tr>
<tr><td colspan="2">Combustion parameters:</td></tr>
<tr><td>Lat=3.990600, Lon=7.287643 deg.</td><td>Tavg=1672.86 K, RHsum=12.1605 MW</td></tr>
<tr><td>Freq. detect.=98.18 %</td><td>Area=86.62 m2</td></tr>
<tr><td>BCM=0.333</td><td>Type: upstream</td></tr>
</table>]]></description><Point>
<coordinates>7.287643,3.990600,0</coordinates>
</Point>
</Placemark>
<Placemark>
<Style id="highlightPlacemark43">
<IconStyle>
<scale>1</scale>
<Icon>
<href>http://maps.google.com/mapfiles/ms/micons/red.png</href>
</Icon>
</IconStyle>
<LabelStyle>
<scale>1</scale>
</LabelStyle>
</Style>
<name>Rank 43</name>
<description><![CDATA[  <table width="500">
<tr><td>Country: <b>VEN</b></td><td>Flare ID: <b>vnfdb_2012_05967</b></td></tr>
<tr><td colspan="2">Combustion parameters:</td></tr>
<tr><td>Lat=9.629150, Lon=-63.694498 deg.</td><td>Tavg=1746.14 K, RHsum=11.7525 MW</td></tr>
<tr><td>Freq. detect.=97.50 %</td><td>Area=100.74 m2</td></tr>
<tr><td>BCM=0.322</td><td>Type: upstream</td></tr>
</table>]]></description><Point>
<coordinates>-63.694498,9.629150,0</coordinates>
</Point>
</Placemark>
<Placemark>
<Style id="highlightPlacemark44">
<IconStyle>
<scale>1</scale>
<Icon>
<href>http://maps.google.com/mapfiles/ms/micons/red.png</href>
</Icon>
</IconStyle>
<LabelStyle>
<scale>1</scale>
</LabelStyle>
</Style>
<name>Rank 44</name>
<description><![CDATA[  <table width="500">
<tr><td>Country: <b>MEX</b></td><td>Flare ID: <b>vnfdb_2012_05640</b></td></tr>
<tr><td colspan="2">Combustion parameters:</td></tr>
<tr><td>Lat=19.426027, Lon=-92.079383 deg.</td><td>Tavg=1725.79 K, RHsum=11.5647 MW</td></tr>
<tr><td>Freq. detect.=95.76 %</td><td>Area=74.14 m2</td></tr>
<tr><td>BCM=0.317</td><td>Type: upstream</td></tr>
</table>]]></description><Point>
<coordinates>-92.079383,19.426027,0</coordinates>
</Point>
</Placemark>
<Placemark>
<Style id="highlightPlacemark45">
<IconStyle>
<scale>1</scale>
<Icon>
<href>http://maps.google.com/mapfiles/ms/micons/red.png</href>
</Icon>
</IconStyle>
<LabelStyle>
<scale>1</scale>
</LabelStyle>
</Style>
<name>Rank 45</name>
<description><![CDATA[  <table width="500">
<tr><td>Country: <b>RUS</b></td><td>Flare ID: <b>vnfdb_2012_11266</b></td></tr>
<tr><td colspan="2">Combustion parameters:</td></tr>
<tr><td>Lat=58.448771, Lon=107.598417 deg.</td><td>Tavg=1748.15 K, RHsum=11.3357 MW</td></tr>
<tr><td>Freq. detect.=94.20 %</td><td>Area=79.61 m2</td></tr>
<tr><td>BCM=0.311</td><td>Type: upstream</td></tr>
</table>]]></description><Point>
<coordinates>107.598417,58.448771,0</coordinates>
</Point>
</Placemark>
<Placemark>
<Style id="highlightPlacemark46">
<IconStyle>
<scale>1</scale>
<Icon>
<href>http://maps.google.com/mapfiles/ms/micons/red.png</href>
</Icon>
</IconStyle>
<LabelStyle>
<scale>1</scale>
</LabelStyle>
</Style>
<name>Rank 46</name>
<description><![CDATA[  <table width="500">
<tr><td>Country: <b>MEX</b></td><td>Flare ID: <b>vnfdb_2012_05643</b></td></tr>
<tr><td colspan="2">Combustion parameters:</td></tr>
<tr><td>Lat=19.397629, Lon=-92.043521 deg.</td><td>Tavg=1696.89 K, RHsum=11.0528 MW</td></tr>
<tr><td>Freq. detect.=95.58 %</td><td>Area=80.76 m2</td></tr>
<tr><td>BCM=0.303</td><td>Type: upstream</td></tr>
</table>]]></description><Point>
<coordinates>-92.043521,19.397629,0</coordinates>
</Point>
</Placemark>
<Placemark>
<Style id="highlightPlacemark47">
<IconStyle>
<scale>1</scale>
<Icon>
<href>http://maps.google.com/mapfiles/kml/shapes/firedept.png</href>
</Icon>
</IconStyle>
<LabelStyle>
<scale>1</scale>
</LabelStyle>
</Style>
<name>Rank 47</name>
<description><![CDATA[  <table width="500">
<tr><td>Country: <b>DZA</b></td><td>Flare ID: <b>vnfdb_2012_07989</b></td></tr>
<tr><td colspan="2">Combustion parameters:</td></tr>
<tr><td>Lat=36.877736, Lon=6.945264 deg.</td><td>Tavg=1673.69 K, RHsum=10.899 MW</td></tr>
<tr><td>Freq. detect.=98.72 %</td><td>Area=94.62 m2</td></tr>
<tr><td>BCM=0.299</td><td>Type: LNG</td></tr>
</table>]]></description><Point>
<coordinates>6.945264,36.877736,0</coordinates>
</Point>
</Placemark>
<Placemark>
<Style id="highlightPlacemark48">
<IconStyle>
<scale>1</scale>
<Icon>
<href>http://maps.google.com/mapfiles/kml/shapes/gas_stations.png</href>
</Icon>
</IconStyle>
<LabelStyle>
<scale>1</scale>
</LabelStyle>
</Style>
<name>Rank 48</name>
<description><![CDATA[  <table width="500">
<tr><td>Country: <b>DZA</b></td><td>Flare ID: <b>vnfdb_2012_07883</b></td></tr>
<tr><td colspan="2">Combustion parameters:</td></tr>
<tr><td>Lat=31.791625, Lon=6.061393 deg.</td><td>Tavg=1706.34 K, RHsum=10.8966 MW</td></tr>
<tr><td>Freq. detect.=98.95 %</td><td>Area=89.56 m2</td></tr>
<tr><td>BCM=0.299</td><td>Type: downstream</td></tr>
</table>]]></description><Point>
<coordinates>6.061393,31.791625,0</coordinates>
</Point>
</Placemark>
<Placemark>
<Style id="highlightPlacemark49">
<IconStyle>
<scale>1</scale>
<Icon>
<href>http://maps.google.com/mapfiles/ms/micons/red.png</href>
</Icon>
</IconStyle>
<LabelStyle>
<scale>1</scale>
</LabelStyle>
</Style>
<name>Rank 49</name>
<description><![CDATA[  <table width="500">
<tr><td>Country: <b>IRQ</b></td><td>Flare ID: <b>vnfdb_2012_08724</b></td></tr>
<tr><td colspan="2">Combustion parameters:</td></tr>
<tr><td>Lat=30.531678, Lon=47.597828 deg.</td><td>Tavg=1672.33 K, RHsum=10.7385 MW</td></tr>
<tr><td>Freq. detect.=99.05 %</td><td>Area=88.59 m2</td></tr>
<tr><td>BCM=0.294</td><td>Type: upstream</td></tr>
</table>]]></description><Point>
<coordinates>47.597828,30.531678,0</coordinates>
</Point>
</Placemark>
<Placemark>
<Style id="highlightPlacemark50">
<IconStyle>
<scale>1</scale>
<Icon>
<href>http://maps.google.com/mapfiles/kml/shapes/gas_stations.png</href>
</Icon>
</IconStyle>
<LabelStyle>
<scale>1</scale>
</LabelStyle>
</Style>
<name>Rank 50</name>
<description><![CDATA[  <table width="500">
<tr><td>Country: <b>SAU</b></td><td>Flare ID: <b>vnfdb_2012_09043</b></td></tr>
<tr><td colspan="2">Combustion parameters:</td></tr>
<tr><td>Lat=27.037827, Lon=49.555613 deg.</td><td>Tavg=1721.5 K, RHsum=10.6948 MW</td></tr>
<tr><td>Freq. detect.=92.98 %</td><td>Area=74.74 m2</td></tr>
<tr><td>BCM=0.293</td><td>Type: downstream</td></tr>
</table>]]></description><Point>
<coordinates>49.555613,27.037827,0</coordinates>
</Point>
</Placemark>
<Placemark>
<Style id="highlightPlacemark51">
<IconStyle>
<scale>1</scale>
<Icon>
<href>http://maps.google.com/mapfiles/ms/micons/red.png</href>
</Icon>
</IconStyle>
<LabelStyle>
<scale>1</scale>
</LabelStyle>
</Style>
<name>Rank 51</name>
<description><![CDATA[  <table width="500">
<tr><td>Country: <b>TKM</b></td><td>Flare ID: <b>vnfdb_2012_09343</b></td></tr>
<tr><td colspan="2">Combustion parameters:</td></tr>
<tr><td>Lat=37.907731, Lon=53.898753 deg.</td><td>Tavg=1695.47 K, RHsum=10.3903 MW</td></tr>
<tr><td>Freq. detect.=70.44 %</td><td>Area=86.70 m2</td></tr>
<tr><td>BCM=0.285</td><td>Type: upstream</td></tr>
</table>]]></description><Point>
<coordinates>53.898753,37.907731,0</coordinates>
</Point>
</Placemark>
<Placemark>
<Style id="highlightPlacemark52">
<IconStyle>
<scale>1</scale>
<Icon>
<href>http://maps.google.com/mapfiles/ms/micons/red.png</href>
</Icon>
</IconStyle>
<LabelStyle>
<scale>1</scale>
</LabelStyle>
</Style>
<name>Rank 52</name>
<description><![CDATA[  <table width="500">
<tr><td>Country: <b>IRQ</b></td><td>Flare ID: <b>vnfdb_2012_08573</b></td></tr>
<tr><td colspan="2">Combustion parameters:</td></tr>
<tr><td>Lat=35.981862, Lon=43.768224 deg.</td><td>Tavg=1697.23 K, RHsum=10.3584 MW</td></tr>
<tr><td>Freq. detect.=95.39 %</td><td>Area=68.79 m2</td></tr>
<tr><td>BCM=0.284</td><td>Type: upstream</td></tr>
</table>]]></description><Point>
<coordinates>43.768224,35.981862,0</coordinates>
</Point>
</Placemark>
<Placemark>
<Style id="highlightPlacemark53">
<IconStyle>
<scale>1</scale>
<Icon>
<href>http://maps.google.com/mapfiles/ms/micons/red.png</href>
</Icon>
</IconStyle>
<LabelStyle>
<scale>1</scale>
</LabelStyle>
</Style>
<name>Rank 53</name>
<description><![CDATA[  <table width="500">
<tr><td>Country: <b>NGA</b></td><td>Flare ID: <b>vnfdb_2012_07947</b></td></tr>
<tr><td colspan="2">Combustion parameters:</td></tr>
<tr><td>Lat=5.250464, Lon=6.598571 deg.</td><td>Tavg=1735.1 K, RHsum=10.161 MW</td></tr>
<tr><td>Freq. detect.=96.72 %</td><td>Area=65.11 m2</td></tr>
<tr><td>BCM=0.278</td><td>Type: upstream</td></tr>
</table>]]></description><Point>
<coordinates>6.598571,5.250464,0</coordinates>
</Point>
</Placemark>
<Placemark>
<Style id="highlightPlacemark54">
<IconStyle>
<scale>0.75</scale>
<Icon>
<href>http://maps.google.com/mapfiles/ms/micons/red.png</href>
</Icon>
</IconStyle>
<LabelStyle>
<scale>1</scale>
</LabelStyle>
</Style>
<name>Rank 54</name>
<description><![CDATA[  <table width="500">
<tr><td>Country: <b>RUS</b></td><td>Flare ID: <b>vnfdb_2012_11231</b></td></tr>
<tr><td colspan="2">Combustion parameters:</td></tr>
<tr><td>Lat=58.035132, Lon=106.544514 deg.</td><td>Tavg=1850.09 K, RHsum=9.91833 MW</td></tr>
<tr><td>Freq. detect.=95.54 %</td><td>Area=47.64 m2</td></tr>
<tr><td>BCM=0.272</td><td>Type: upstream</td></tr>
</table>]]></description><Point>
<coordinates>106.544514,58.035132,0</coordinates>
</Point>
</Placemark>
<Placemark>
<Style id="highlightPlacemark55">
<IconStyle>
<scale>0.75</scale>
<Icon>
<href>http://maps.google.com/mapfiles/ms/micons/red.png</href>
</Icon>
</IconStyle>
<LabelStyle>
<scale>1</scale>
</LabelStyle>
</Style>
<name>Rank 55</name>
<description><![CDATA[  <table width="500">
<tr><td>Country: <b>RUS</b></td><td>Flare ID: <b>vnfdb_2012_10418</b></td></tr>
<tr><td colspan="2">Combustion parameters:</td></tr>
<tr><td>Lat=60.549709, Lon=72.313646 deg.</td><td>Tavg=1747.62 K, RHsum=9.70568 MW</td></tr>
<tr><td>Freq. detect.=90.30 %</td><td>Area=61.13 m2</td></tr>
<tr><td>BCM=0.266</td><td>Type: upstream</td></tr>
</table>]]></description><Point>
<coordinates>72.313646,60.549709,0</coordinates>
</Point>
</Placemark>
<Placemark>
<Style id="highlightPlacemark56">
<IconStyle>
<scale>0.75</scale>
<Icon>
<href>http://maps.google.com/mapfiles/ms/micons/red.png</href>
</Icon>
</IconStyle>
<LabelStyle>
<scale>1</scale>
</LabelStyle>
</Style>
<name>Rank 56</name>
<description><![CDATA[  <table width="500">
<tr><td>Country: <b>RUS</b></td><td>Flare ID: <b>vnfdb_2012_10874</b></td></tr>
<tr><td colspan="2">Combustion parameters:</td></tr>
<tr><td>Lat=65.085096, Lon=78.306170 deg.</td><td>Tavg=1806.15 K, RHsum=9.70383 MW</td></tr>
<tr><td>Freq. detect.=94.83 %</td><td>Area=42.51 m2</td></tr>
<tr><td>BCM=0.266</td><td>Type: upstream</td></tr>
</table>]]></description><Point>
<coordinates>78.306170,65.085096,0</coordinates>
</Point>
</Placemark>
<Placemark>
<Style id="highlightPlacemark57">
<IconStyle>
<scale>0.75</scale>
<Icon>
<href>http://maps.google.com/mapfiles/ms/micons/red.png</href>
</Icon>
</IconStyle>
<LabelStyle>
<scale>1</scale>
</LabelStyle>
</Style>
<name>Rank 57</name>
<description><![CDATA[  <table width="500">
<tr><td>Country: <b>LBY</b></td><td>Flare ID: <b>vnfdb_2012_08134</b></td></tr>
<tr><td colspan="2">Combustion parameters:</td></tr>
<tr><td>Lat=26.756809, Lon=12.411250 deg.</td><td>Tavg=1659.17 K, RHsum=9.66666 MW</td></tr>
<tr><td>Freq. detect.=94.54 %</td><td>Area=74.88 m2</td></tr>
<tr><td>BCM=0.265</td><td>Type: upstream</td></tr>
</table>]]></description><Point>
<coordinates>12.411250,26.756809,0</coordinates>
</Point>
</Placemark>
<Placemark>
<Style id="highlightPlacemark58">
<IconStyle>
<scale>0.75</scale>
<Icon>
<href>http://maps.google.com/mapfiles/ms/micons/red.png</href>
</Icon>
</IconStyle>
<LabelStyle>
<scale>1</scale>
</LabelStyle>
</Style>
<name>Rank 58</name>
<description><![CDATA[  <table width="500">
<tr><td>Country: <b>MEX</b></td><td>Flare ID: <b>vnfdb_2012_05644</b></td></tr>
<tr><td colspan="2">Combustion parameters:</td></tr>
<tr><td>Lat=19.438487, Lon=-92.037002 deg.</td><td>Tavg=1700.32 K, RHsum=9.62067 MW</td></tr>
<tr><td>Freq. detect.=94.92 %</td><td>Area=60.20 m2</td></tr>
<tr><td>BCM=0.264</td><td>Type: upstream</td></tr>
</table>]]></description><Point>
<coordinates>-92.037002,19.438487,0</coordinates>
</Point>
</Placemark>
<Placemark>
<Style id="highlightPlacemark59">
<IconStyle>
<scale>0.75</scale>
<Icon>
<href>http://maps.google.com/mapfiles/ms/micons/red.png</href>
</Icon>
</IconStyle>
<LabelStyle>
<scale>1</scale>
</LabelStyle>
</Style>
<name>Rank 59</name>
<description><![CDATA[  <table width="500">
<tr><td>Country: <b>IRQ</b></td><td>Flare ID: <b>vnfdb_2012_08578</b></td></tr>
<tr><td colspan="2">Combustion parameters:</td></tr>
<tr><td>Lat=34.896091, Lon=43.804613 deg.</td><td>Tavg=1586.94 K, RHsum=9.55339 MW</td></tr>
<tr><td>Freq. detect.=97.16 %</td><td>Area=91.83 m2</td></tr>
<tr><td>BCM=0.262</td><td>Type: upstream</td></tr>
</table>]]></description><Point>
<coordinates>43.804613,34.896091,0</coordinates>
</Point>
</Placemark>
<Placemark>
<Style id="highlightPlacemark60">
<IconStyle>
<scale>0.75</scale>
<Icon>
<href>http://maps.google.com/mapfiles/kml/shapes/firedept.png</href>
</Icon>
</IconStyle>
<LabelStyle>
<scale>1</scale>
</LabelStyle>
</Style>
<name>Rank 60</name>
<description><![CDATA[  <table width="500">
<tr><td>Country: <b>QAT</b></td><td>Flare ID: <b>vnfdb_2012_09215</b></td></tr>
<tr><td colspan="2">Combustion parameters:</td></tr>
<tr><td>Lat=25.884602, Lon=51.537216 deg.</td><td>Tavg=1678.12 K, RHsum=9.5147 MW</td></tr>
<tr><td>Freq. detect.=97.93 %</td><td>Area=84.66 m2</td></tr>
<tr><td>BCM=0.261</td><td>Type: LNG</td></tr>
</table>]]></description><Point>
<coordinates>51.537216,25.884602,0</coordinates>
</Point>
</Placemark>
<Placemark>
<Style id="highlightPlacemark61">
<IconStyle>
<scale>0.75</scale>
<Icon>
<href>http://maps.google.com/mapfiles/ms/micons/red.png</href>
</Icon>
</IconStyle>
<LabelStyle>
<scale>1</scale>
</LabelStyle>
</Style>
<name>Rank 61</name>
<description><![CDATA[  <table width="500">
<tr><td>Country: <b>NGA</b></td><td>Flare ID: <b>vnfdb_2012_09677</b></td></tr>
<tr><td colspan="2">Combustion parameters:</td></tr>
<tr><td>Lat=4.146666, Lon=7.971117 deg.</td><td>Tavg=1666.26 K, RHsum=9.42692 MW</td></tr>
<tr><td>Freq. detect.=95.56 %</td><td>Area=75.22 m2</td></tr>
<tr><td>BCM=0.258</td><td>Type: upstream</td></tr>
</table>]]></description><Point>
<coordinates>7.971117,4.146666,0</coordinates>
</Point>
</Placemark>
<Placemark>
<Style id="highlightPlacemark63">
<IconStyle>
<scale>0.75</scale>
<Icon>
<href>http://maps.google.com/mapfiles/kml/shapes/gas_stations.png</href>
</Icon>
</IconStyle>
<LabelStyle>
<scale>1</scale>
</LabelStyle>
</Style>
<name>Rank 63</name>
<description><![CDATA[  <table width="500">
<tr><td>Country: <b>IRN</b></td><td>Flare ID: <b>vnfdb_2012_09114</b></td></tr>
<tr><td colspan="2">Combustion parameters:</td></tr>
<tr><td>Lat=29.244014, Lon=50.302951 deg.</td><td>Tavg=1704.45 K, RHsum=9.24546 MW</td></tr>
<tr><td>Freq. detect.=96.59 %</td><td>Area=74.65 m2</td></tr>
<tr><td>BCM=0.253</td><td>Type: downstream</td></tr>
</table>]]></description><Point>
<coordinates>50.302951,29.244014,0</coordinates>
</Point>
</Placemark>
<Placemark>
<Style id="highlightPlacemark64">
<IconStyle>
<scale>0.75</scale>
<Icon>
<href>http://maps.google.com/mapfiles/ms/micons/red.png</href>
</Icon>
</IconStyle>
<LabelStyle>
<scale>1</scale>
</LabelStyle>
</Style>
<name>Rank 64</name>
<description><![CDATA[  <table width="500">
<tr><td>Country: <b>MEX</b></td><td>Flare ID: <b>vnfdb_2012_05582</b></td></tr>
<tr><td colspan="2">Combustion parameters:</td></tr>
<tr><td>Lat=17.895753, Lon=-93.186997 deg.</td><td>Tavg=1551.98 K, RHsum=9.19732 MW</td></tr>
<tr><td>Freq. detect.=97.31 %</td><td>Area=114.49 m2</td></tr>
<tr><td>BCM=0.252</td><td>Type: upstream</td></tr>
</table>]]></description><Point>
<coordinates>-93.186997,17.895753,0</coordinates>
</Point>
</Placemark>
<Placemark>
<Style id="highlightPlacemark65">
<IconStyle>
<scale>0.75</scale>
<Icon>
<href>http://maps.google.com/mapfiles/ms/micons/red.png</href>
</Icon>
</IconStyle>
<LabelStyle>
<scale>1</scale>
</LabelStyle>
</Style>
<name>Rank 65</name>
<description><![CDATA[  <table width="500">
<tr><td>Country: <b>IRQ</b></td><td>Flare ID: <b>vnfdb_2012_08733</b></td></tr>
<tr><td colspan="2">Combustion parameters:</td></tr>
<tr><td>Lat=30.752581, Lon=47.664554 deg.</td><td>Tavg=1709.68 K, RHsum=9.1951 MW</td></tr>
<tr><td>Freq. detect.=98.13 %</td><td>Area=67.15 m2</td></tr>
<tr><td>BCM=0.252</td><td>Type: upstream</td></tr>
</table>]]></description><Point>
<coordinates>47.664554,30.752581,0</coordinates>
</Point>
</Placemark>
<Placemark>
<Style id="highlightPlacemark66">
<IconStyle>
<scale>0.75</scale>
<Icon>
<href>http://maps.google.com/mapfiles/ms/micons/red.png</href>
</Icon>
</IconStyle>
<LabelStyle>
<scale>1</scale>
</LabelStyle>
</Style>
<name>Rank 66</name>
<description><![CDATA[  <table width="500">
<tr><td>Country: <b>RUS</b></td><td>Flare ID: <b>vnfdb_2012_10380</b></td></tr>
<tr><td colspan="2">Combustion parameters:</td></tr>
<tr><td>Lat=60.748468, Lon=70.817012 deg.</td><td>Tavg=1821.63 K, RHsum=9.13736 MW</td></tr>
<tr><td>Freq. detect.=86.29 %</td><td>Area=40.80 m2</td></tr>
<tr><td>BCM=0.25</td><td>Type: upstream</td></tr>
</table>]]></description><Point>
<coordinates>70.817012,60.748468,0</coordinates>
</Point>
</Placemark>
<Placemark>
<Style id="highlightPlacemark67">
<IconStyle>
<scale>0.75</scale>
<Icon>
<href>http://maps.google.com/mapfiles/ms/micons/red.png</href>
</Icon>
</IconStyle>
<LabelStyle>
<scale>1</scale>
</LabelStyle>
</Style>
<name>Rank 67</name>
<description><![CDATA[  <table width="500">
<tr><td>Country: <b>DZA</b></td><td>Flare ID: <b>vnfdb_2012_07971</b></td></tr>
<tr><td colspan="2">Combustion parameters:</td></tr>
<tr><td>Lat=29.690785, Lon=6.700422 deg.</td><td>Tavg=1675.9 K, RHsum=9.13694 MW</td></tr>
<tr><td>Freq. detect.=95.40 %</td><td>Area=71.80 m2</td></tr>
<tr><td>BCM=0.25</td><td>Type: upstream</td></tr>
</table>]]></description><Point>
<coordinates>6.700422,29.690785,0</coordinates>
</Point>
</Placemark>
<Placemark>
<Style id="highlightPlacemark68">
<IconStyle>
<scale>0.75</scale>
<Icon>
<href>http://maps.google.com/mapfiles/ms/micons/red.png</href>
</Icon>
</IconStyle>
<LabelStyle>
<scale>1</scale>
</LabelStyle>
</Style>
<name>Rank 68</name>
<description><![CDATA[  <table width="500">
<tr><td>Country: <b>YEM</b></td><td>Flare ID: <b>vnfdb_2012_08854</b></td></tr>
<tr><td colspan="2">Combustion parameters:</td></tr>
<tr><td>Lat=15.716525, Lon=48.798182 deg.</td><td>Tavg=1834.14 K, RHsum=9.05811 MW</td></tr>
<tr><td>Freq. detect.=97.42 %</td><td>Area=41.31 m2</td></tr>
<tr><td>BCM=0.248</td><td>Type: upstream</td></tr>
</table>]]></description><Point>
<coordinates>48.798182,15.716525,0</coordinates>
</Point>
</Placemark>
<Placemark>
<Style id="highlightPlacemark69">
<IconStyle>
<scale>0.75</scale>
<Icon>
<href>http://maps.google.com/mapfiles/ms/micons/red.png</href>
</Icon>
</IconStyle>
<LabelStyle>
<scale>1</scale>
</LabelStyle>
</Style>
<name>Rank 69</name>
<description><![CDATA[  <table width="500">
<tr><td>Country: <b>RUS</b></td><td>Flare ID: <b>vnfdb_2012_10707</b></td></tr>
<tr><td colspan="2">Combustion parameters:</td></tr>
<tr><td>Lat=62.334476, Lon=76.731572 deg.</td><td>Tavg=1725.79 K, RHsum=9.03257 MW</td></tr>
<tr><td>Freq. detect.=92.20 %</td><td>Area=61.91 m2</td></tr>
<tr><td>BCM=0.247</td><td>Type: upstream</td></tr>
</table>]]></description><Point>
<coordinates>76.731572,62.334476,0</coordinates>
</Point>
</Placemark>
<Placemark>
<Style id="highlightPlacemark70">
<IconStyle>
<scale>0.75</scale>
<Icon>
<href>http://maps.google.com/mapfiles/ms/micons/red.png</href>
</Icon>
</IconStyle>
<LabelStyle>
<scale>1</scale>
</LabelStyle>
</Style>
<name>Rank 70</name>
<description><![CDATA[  <table width="500">
<tr><td>Country: <b>VEN</b></td><td>Flare ID: <b>vnfdb_2012_05994</b></td></tr>
<tr><td colspan="2">Combustion parameters:</td></tr>
<tr><td>Lat=9.672501, Lon=-63.484652 deg.</td><td>Tavg=1820.74 K, RHsum=9.00642 MW</td></tr>
<tr><td>Freq. detect.=96.88 %</td><td>Area=38.45 m2</td></tr>
<tr><td>BCM=0.247</td><td>Type: upstream</td></tr>
</table>]]></description><Point>
<coordinates>-63.484652,9.672501,0</coordinates>
</Point>
</Placemark>
<Placemark>
<Style id="highlightPlacemark71">
<IconStyle>
<scale>0.75</scale>
<Icon>
<href>http://maps.google.com/mapfiles/ms/micons/red.png</href>
</Icon>
</IconStyle>
<LabelStyle>
<scale>1</scale>
</LabelStyle>
</Style>
<name>Rank 71</name>
<description><![CDATA[  <table width="500">
<tr><td>Country: <b>VEN</b></td><td>Flare ID: <b>vnfdb_2012_05945</b></td></tr>
<tr><td colspan="2">Combustion parameters:</td></tr>
<tr><td>Lat=8.557599, Lon=-64.135243 deg.</td><td>Tavg=1770.26 K, RHsum=8.97341 MW</td></tr>
<tr><td>Freq. detect.=98.57 %</td><td>Area=46.25 m2</td></tr>
<tr><td>BCM=0.246</td><td>Type: upstream</td></tr>
</table>]]></description><Point>
<coordinates>-64.135243,8.557599,0</coordinates>
</Point>
</Placemark>
<Placemark>
<Style id="highlightPlacemark72">
<IconStyle>
<scale>0.75</scale>
<Icon>
<href>http://maps.google.com/mapfiles/ms/micons/red.png</href>
</Icon>
</IconStyle>
<LabelStyle>
<scale>1</scale>
</LabelStyle>
</Style>
<name>Rank 72</name>
<description><![CDATA[  <table width="500">
<tr><td>Country: <b>LBY</b></td><td>Flare ID: <b>vnfdb_2012_08182</b></td></tr>
<tr><td colspan="2">Combustion parameters:</td></tr>
<tr><td>Lat=29.073442, Lon=19.060831 deg.</td><td>Tavg=1733.7 K, RHsum=8.9451 MW</td></tr>
<tr><td>Freq. detect.=99.40 %</td><td>Area=51.32 m2</td></tr>
<tr><td>BCM=0.245</td><td>Type: upstream</td></tr>
</table>]]></description><Point>
<coordinates>19.060831,29.073442,0</coordinates>
</Point>
</Placemark>
<Placemark>
<Style id="highlightPlacemark73">
<IconStyle>
<scale>0.75</scale>
<Icon>
<href>http://maps.google.com/mapfiles/ms/micons/red.png</href>
</Icon>
</IconStyle>
<LabelStyle>
<scale>1</scale>
</LabelStyle>
</Style>
<name>Rank 73</name>
<description><![CDATA[  <table width="500">
<tr><td>Country: <b>RUS</b></td><td>Flare ID: <b>vnfdb_2012_12875</b></td></tr>
<tr><td colspan="2">Combustion parameters:</td></tr>
<tr><td>Lat=53.147154, Lon=143.256055 deg.</td><td>Tavg=1878.55 K, RHsum=8.92667 MW</td></tr>
<tr><td>Freq. detect.=93.20 %</td><td>Area=41.10 m2</td></tr>
<tr><td>BCM=0.245</td><td>Type: upstream</td></tr>
</table>]]></description><Point>
<coordinates>143.256055,53.147154,0</coordinates>
</Point>
</Placemark>
<Placemark>
<Style id="highlightPlacemark74">
<IconStyle>
<scale>0.75</scale>
<Icon>
<href>http://maps.google.com/mapfiles/ms/micons/red.png</href>
</Icon>
</IconStyle>
<LabelStyle>
<scale>1</scale>
</LabelStyle>
</Style>
<name>Rank 74</name>
<description><![CDATA[  <table width="500">
<tr><td>Country: <b>IRN</b></td><td>Flare ID: <b>vnfdb_2012_08660</b></td></tr>
<tr><td colspan="2">Combustion parameters:</td></tr>
<tr><td>Lat=33.696537, Lon=46.227765 deg.</td><td>Tavg=1734.28 K, RHsum=8.89876 MW</td></tr>
<tr><td>Freq. detect.=85.58 %</td><td>Area=62.67 m2</td></tr>
<tr><td>BCM=0.244</td><td>Type: upstream</td></tr>
</table>]]></description><Point>
<coordinates>46.227765,33.696537,0</coordinates>
</Point>
</Placemark>
<Placemark>
<Style id="highlightPlacemark75">
<IconStyle>
<scale>0.75</scale>
<Icon>
<href>http://maps.google.com/mapfiles/kml/shapes/firedept.png</href>
</Icon>
</IconStyle>
<LabelStyle>
<scale>1</scale>
</LabelStyle>
</Style>
<name>Rank 75</name>
<description><![CDATA[  <table width="500">
<tr><td>Country: <b>AUS</b></td><td>Flare ID: <b>vnfdb_2012_12696</b></td></tr>
<tr><td colspan="2">Combustion parameters:</td></tr>
<tr><td>Lat=-20.610227, Lon=116.762186 deg.</td><td>Tavg=1734.22 K, RHsum=8.89326 MW</td></tr>
<tr><td>Freq. detect.=98.45 %</td><td>Area=54.96 m2</td></tr>
<tr><td>BCM=0.244</td><td>Type: LNG</td></tr>
</table>]]></description><Point>
<coordinates>116.762186,-20.610227,0</coordinates>
</Point>
</Placemark>
<Placemark>
<Style id="highlightPlacemark76">
<IconStyle>
<scale>0.75</scale>
<Icon>
<href>http://maps.google.com/mapfiles/ms/micons/red.png</href>
</Icon>
</IconStyle>
<LabelStyle>
<scale>1</scale>
</LabelStyle>
</Style>
<name>Rank 76</name>
<description><![CDATA[  <table width="500">
<tr><td>Country: <b>VEN</b></td><td>Flare ID: <b>vnfdb_2012_05946</b></td></tr>
<tr><td colspan="2">Combustion parameters:</td></tr>
<tr><td>Lat=8.527598, Lon=-64.072474 deg.</td><td>Tavg=1774.03 K, RHsum=8.88121 MW</td></tr>
<tr><td>Freq. detect.=98.57 %</td><td>Area=48.35 m2</td></tr>
<tr><td>BCM=0.243</td><td>Type: upstream</td></tr>
</table>]]></description><Point>
<coordinates>-64.072474,8.527598,0</coordinates>
</Point>
</Placemark>
<Placemark>
<Style id="highlightPlacemark77">
<IconStyle>
<scale>0.75</scale>
<Icon>
<href>http://maps.google.com/mapfiles/kml/shapes/firedept.png</href>
</Icon>
</IconStyle>
<LabelStyle>
<scale>1</scale>
</LabelStyle>
</Style>
<name>Rank 77</name>
<description><![CDATA[  <table width="500">
<tr><td>Country: <b>QAT</b></td><td>Flare ID: <b>vnfdb_2012_09218</b></td></tr>
<tr><td colspan="2">Combustion parameters:</td></tr>
<tr><td>Lat=25.904989, Lon=51.549263 deg.</td><td>Tavg=1656.85 K, RHsum=8.85193 MW</td></tr>
<tr><td>Freq. detect.=98.21 %</td><td>Area=90.89 m2</td></tr>
<tr><td>BCM=0.243</td><td>Type: LNG</td></tr>
</table>]]></description><Point>
<coordinates>51.549263,25.904989,0</coordinates>
</Point>
</Placemark>
<Placemark>
<Style id="highlightPlacemark78">
<IconStyle>
<scale>0.75</scale>
<Icon>
<href>http://maps.google.com/mapfiles/ms/micons/red.png</href>
</Icon>
</IconStyle>
<LabelStyle>
<scale>1</scale>
</LabelStyle>
</Style>
<name>Rank 78</name>
<description><![CDATA[  <table width="500">
<tr><td>Country: <b>IRN</b></td><td>Flare ID: <b>vnfdb_2012_08739</b></td></tr>
<tr><td colspan="2">Combustion parameters:</td></tr>
<tr><td>Lat=32.353462, Lon=47.705713 deg.</td><td>Tavg=1636.88 K, RHsum=8.76558 MW</td></tr>
<tr><td>Freq. detect.=96.40 %</td><td>Area=77.83 m2</td></tr>
<tr><td>BCM=0.24</td><td>Type: upstream</td></tr>
</table>]]></description><Point>
<coordinates>47.705713,32.353462,0</coordinates>
</Point>
</Placemark>
<Placemark>
<Style id="highlightPlacemark79">
<IconStyle>
<scale>0.75</scale>
<Icon>
<href>http://maps.google.com/mapfiles/ms/micons/red.png</href>
</Icon>
</IconStyle>
<LabelStyle>
<scale>1</scale>
</LabelStyle>
</Style>
<name>Rank 79</name>
<description><![CDATA[  <table width="500">
<tr><td>Country: <b>RUS</b></td><td>Flare ID: <b>vnfdb_2012_10363</b></td></tr>
<tr><td colspan="2">Combustion parameters:</td></tr>
<tr><td>Lat=61.098148, Lon=70.189078 deg.</td><td>Tavg=1760.51 K, RHsum=8.64826 MW</td></tr>
<tr><td>Freq. detect.=74.88 %</td><td>Area=48.19 m2</td></tr>
<tr><td>BCM=0.237</td><td>Type: upstream</td></tr>
</table>]]></description><Point>
<coordinates>70.189078,61.098148,0</coordinates>
</Point>
</Placemark>
<Placemark>
<Style id="highlightPlacemark80">
<IconStyle>
<scale>0.75</scale>
<Icon>
<href>http://maps.google.com/mapfiles/ms/micons/red.png</href>
</Icon>
</IconStyle>
<LabelStyle>
<scale>1</scale>
</LabelStyle>
</Style>
<name>Rank 80</name>
<description><![CDATA[  <table width="500">
<tr><td>Country: <b>RUS</b></td><td>Flare ID: <b>vnfdb_2012_10867</b></td></tr>
<tr><td colspan="2">Combustion parameters:</td></tr>
<tr><td>Lat=62.333104, Lon=78.164255 deg.</td><td>Tavg=1746.17 K, RHsum=8.64772 MW</td></tr>
<tr><td>Freq. detect.=93.98 %</td><td>Area=49.76 m2</td></tr>
<tr><td>BCM=0.237</td><td>Type: upstream</td></tr>
</table>]]></description><Point>
<coordinates>78.164255,62.333104,0</coordinates>
</Point>
</Placemark>
<Placemark>
<Style id="highlightPlacemark81">
<IconStyle>
<scale>0.75</scale>
<Icon>
<href>http://maps.google.com/mapfiles/ms/micons/red.png</href>
</Icon>
</IconStyle>
<LabelStyle>
<scale>1</scale>
</LabelStyle>
</Style>
<name>Rank 81</name>
<description><![CDATA[  <table width="500">
<tr><td>Country: <b>IRQ</b></td><td>Flare ID: <b>vnfdb_2012_08583</b></td></tr>
<tr><td colspan="2">Combustion parameters:</td></tr>
<tr><td>Lat=35.629719, Lon=44.007923 deg.</td><td>Tavg=1726.42 K, RHsum=8.62821 MW</td></tr>
<tr><td>Freq. detect.=98.65 %</td><td>Area=46.86 m2</td></tr>
<tr><td>BCM=0.236</td><td>Type: upstream</td></tr>
</table>]]></description><Point>
<coordinates>44.007923,35.629719,0</coordinates>
</Point>
</Placemark>
<Placemark>
<Style id="highlightPlacemark82">
<IconStyle>
<scale>0.75</scale>
<Icon>
<href>http://maps.google.com/mapfiles/ms/micons/red.png</href>
</Icon>
</IconStyle>
<LabelStyle>
<scale>1</scale>
</LabelStyle>
</Style>
<name>Rank 82</name>
<description><![CDATA[  <table width="500">
<tr><td>Country: <b>LBY</b></td><td>Flare ID: <b>vnfdb_2012_08240</b></td></tr>
<tr><td colspan="2">Combustion parameters:</td></tr>
<tr><td>Lat=27.987863, Lon=22.322659 deg.</td><td>Tavg=1640.36 K, RHsum=8.41909 MW</td></tr>
<tr><td>Freq. detect.=97.83 %</td><td>Area=62.66 m2</td></tr>
<tr><td>BCM=0.231</td><td>Type: upstream</td></tr>
</table>]]></description><Point>
<coordinates>22.322659,27.987863,0</coordinates>
</Point>
</Placemark>
<Placemark>
<Style id="highlightPlacemark83">
<IconStyle>
<scale>0.75</scale>
<Icon>
<href>http://maps.google.com/mapfiles/ms/micons/red.png</href>
</Icon>
</IconStyle>
<LabelStyle>
<scale>1</scale>
</LabelStyle>
</Style>
<name>Rank 83</name>
<description><![CDATA[  <table width="500">
<tr><td>Country: <b>MEX</b></td><td>Flare ID: <b>vnfdb_2012_05591</b></td></tr>
<tr><td colspan="2">Combustion parameters:</td></tr>
<tr><td>Lat=17.843700, Lon=-93.122315 deg.</td><td>Tavg=1657.31 K, RHsum=8.2016 MW</td></tr>
<tr><td>Freq. detect.=99.09 %</td><td>Area=62.55 m2</td></tr>
<tr><td>BCM=0.225</td><td>Type: upstream</td></tr>
</table>]]></description><Point>
<coordinates>-93.122315,17.843700,0</coordinates>
</Point>
</Placemark>
<Placemark>
<Style id="highlightPlacemark84">
<IconStyle>
<scale>0.75</scale>
<Icon>
<href>http://maps.google.com/mapfiles/ms/micons/red.png</href>
</Icon>
</IconStyle>
<LabelStyle>
<scale>1</scale>
</LabelStyle>
</Style>
<name>Rank 84</name>
<description><![CDATA[  <table width="500">
<tr><td>Country: <b>DZA</b></td><td>Flare ID: <b>vnfdb_2012_08018</b></td></tr>
<tr><td colspan="2">Combustion parameters:</td></tr>
<tr><td>Lat=31.014557, Lon=8.163310 deg.</td><td>Tavg=1632 K, RHsum=8.16538 MW</td></tr>
<tr><td>Freq. detect.=99.38 %</td><td>Area=85.96 m2</td></tr>
<tr><td>BCM=0.224</td><td>Type: upstream</td></tr>
</table>]]></description><Point>
<coordinates>8.163310,31.014557,0</coordinates>
</Point>
</Placemark>
<Placemark>
<Style id="highlightPlacemark85">
<IconStyle>
<scale>0.75</scale>
<Icon>
<href>http://maps.google.com/mapfiles/ms/micons/red.png</href>
</Icon>
</IconStyle>
<LabelStyle>
<scale>1</scale>
</LabelStyle>
</Style>
<name>Rank 85</name>
<description><![CDATA[  <table width="500">
<tr><td>Country: <b>IRQ</b></td><td>Flare ID: <b>vnfdb_2012_08691</b></td></tr>
<tr><td colspan="2">Combustion parameters:</td></tr>
<tr><td>Lat=30.562499, Lon=47.327051 deg.</td><td>Tavg=1537.05 K, RHsum=8.15802 MW</td></tr>
<tr><td>Freq. detect.=98.44 %</td><td>Area=84.23 m2</td></tr>
<tr><td>BCM=0.224</td><td>Type: upstream</td></tr>
</table>]]></description><Point>
<coordinates>47.327051,30.562499,0</coordinates>
</Point>
</Placemark>
<Placemark>
<Style id="highlightPlacemark86">
<IconStyle>
<scale>0.75</scale>
<Icon>
<href>http://maps.google.com/mapfiles/ms/micons/red.png</href>
</Icon>
</IconStyle>
<LabelStyle>
<scale>1</scale>
</LabelStyle>
</Style>
<name>Rank 86</name>
<description><![CDATA[  <table width="500">
<tr><td>Country: <b>RUS</b></td><td>Flare ID: <b>vnfdb_2012_10939</b></td></tr>
<tr><td colspan="2">Combustion parameters:</td></tr>
<tr><td>Lat=57.269803, Lon=79.387946 deg.</td><td>Tavg=1716.48 K, RHsum=8.15047 MW</td></tr>
<tr><td>Freq. detect.=93.21 %</td><td>Area=64.35 m2</td></tr>
<tr><td>BCM=0.223</td><td>Type: upstream</td></tr>
</table>]]></description><Point>
<coordinates>79.387946,57.269803,0</coordinates>
</Point>
</Placemark>
<Placemark>
<Style id="highlightPlacemark87">
<IconStyle>
<scale>0.75</scale>
<Icon>
<href>http://maps.google.com/mapfiles/ms/micons/red.png</href>
</Icon>
</IconStyle>
<LabelStyle>
<scale>1</scale>
</LabelStyle>
</Style>
<name>Rank 87</name>
<description><![CDATA[  <table width="500">
<tr><td>Country: <b>IRQ</b></td><td>Flare ID: <b>vnfdb_2012_08741</b></td></tr>
<tr><td colspan="2">Combustion parameters:</td></tr>
<tr><td>Lat=30.267137, Lon=47.715688 deg.</td><td>Tavg=1669.96 K, RHsum=8.10504 MW</td></tr>
<tr><td>Freq. detect.=96.18 %</td><td>Area=59.55 m2</td></tr>
<tr><td>BCM=0.222</td><td>Type: upstream</td></tr>
</table>]]></description><Point>
<coordinates>47.715688,30.267137,0</coordinates>
</Point>
</Placemark>
<Placemark>
<Style id="highlightPlacemark88">
<IconStyle>
<scale>0.75</scale>
<Icon>
<href>http://maps.google.com/mapfiles/ms/micons/red.png</href>
</Icon>
</IconStyle>
<LabelStyle>
<scale>1</scale>
</LabelStyle>
</Style>
<name>Rank 88</name>
<description><![CDATA[  <table width="500">
<tr><td>Country: <b>NGA</b></td><td>Flare ID: <b>vnfdb_2012_07961</b></td></tr>
<tr><td colspan="2">Combustion parameters:</td></tr>
<tr><td>Lat=5.635034, Lon=6.668159 deg.</td><td>Tavg=1637.08 K, RHsum=8.07214 MW</td></tr>
<tr><td>Freq. detect.=98.00 %</td><td>Area=70.07 m2</td></tr>
<tr><td>BCM=0.221</td><td>Type: upstream</td></tr>
</table>]]></description><Point>
<coordinates>6.668159,5.635034,0</coordinates>
</Point>
</Placemark>
<Placemark>
<Style id="highlightPlacemark89">
<IconStyle>
<scale>0.75</scale>
<Icon>
<href>http://maps.google.com/mapfiles/ms/micons/red.png</href>
</Icon>
</IconStyle>
<LabelStyle>
<scale>1</scale>
</LabelStyle>
</Style>
<name>Rank 89</name>
<description><![CDATA[  <table width="500">
<tr><td>Country: <b>MYS</b></td><td>Flare ID: <b>vnfdb_2012_12315</b></td></tr>
<tr><td colspan="2">Combustion parameters:</td></tr>
<tr><td>Lat=6.347585, Lon=115.656785 deg.</td><td>Tavg=1814.71 K, RHsum=8.07168 MW</td></tr>
<tr><td>Freq. detect.=89.55 %</td><td>Area=37.45 m2</td></tr>
<tr><td>BCM=0.221</td><td>Type: upstream</td></tr>
</table>]]></description><Point>
<coordinates>115.656785,6.347585,0</coordinates>
</Point>
</Placemark>
<Placemark>
<Style id="highlightPlacemark90">
<IconStyle>
<scale>0.75</scale>
<Icon>
<href>http://maps.google.com/mapfiles/ms/micons/red.png</href>
</Icon>
</IconStyle>
<LabelStyle>
<scale>1</scale>
</LabelStyle>
</Style>
<name>Rank 90</name>
<description><![CDATA[  <table width="500">
<tr><td>Country: <b>KAZ</b></td><td>Flare ID: <b>vnfdb_2012_07633</b></td></tr>
<tr><td colspan="2">Combustion parameters:</td></tr>
<tr><td>Lat=48.474095, Lon=57.669689 deg.</td><td>Tavg=1764.41 K, RHsum=7.89305 MW</td></tr>
<tr><td>Freq. detect.=94.83 %</td><td>Area=45.63 m2</td></tr>
<tr><td>BCM=0.216</td><td>Type: upstream</td></tr>
</table>]]></description><Point>
<coordinates>57.669689,48.474095,0</coordinates>
</Point>
</Placemark>
<Placemark>
<Style id="highlightPlacemark91">
<IconStyle>
<scale>0.75</scale>
<Icon>
<href>http://maps.google.com/mapfiles/ms/micons/red.png</href>
</Icon>
</IconStyle>
<LabelStyle>
<scale>1</scale>
</LabelStyle>
</Style>
<name>Rank 91</name>
<description><![CDATA[  <table width="500">
<tr><td>Country: <b>IRN</b></td><td>Flare ID: <b>vnfdb_2012_08833</b></td></tr>
<tr><td colspan="2">Combustion parameters:</td></tr>
<tr><td>Lat=30.750472, Lon=48.278467 deg.</td><td>Tavg=1657.66 K, RHsum=7.78629 MW</td></tr>
<tr><td>Freq. detect.=92.64 %</td><td>Area=60.80 m2</td></tr>
<tr><td>BCM=0.213</td><td>Type: upstream</td></tr>
</table>]]></description><Point>
<coordinates>48.278467,30.750472,0</coordinates>
</Point>
</Placemark>
<Placemark>
<Style id="highlightPlacemark92">
<IconStyle>
<scale>0.75</scale>
<Icon>
<href>http://maps.google.com/mapfiles/ms/micons/red.png</href>
</Icon>
</IconStyle>
<LabelStyle>
<scale>1</scale>
</LabelStyle>
</Style>
<name>Rank 92</name>
<description><![CDATA[  <table width="500">
<tr><td>Country: <b>IRQ</b></td><td>Flare ID: <b>vnfdb_2012_08668</b></td></tr>
<tr><td colspan="2">Combustion parameters:</td></tr>
<tr><td>Lat=30.353242, Lon=46.837178 deg.</td><td>Tavg=1685.21 K, RHsum=7.68201 MW</td></tr>
<tr><td>Freq. detect.=82.00 %</td><td>Area=52.68 m2</td></tr>
<tr><td>BCM=0.21</td><td>Type: upstream</td></tr>
</table>]]></description><Point>
<coordinates>46.837178,30.353242,0</coordinates>
</Point>
</Placemark>
<Placemark>
<Style id="highlightPlacemark93">
<IconStyle>
<scale>0.75</scale>
<Icon>
<href>http://maps.google.com/mapfiles/ms/micons/red.png</href>
</Icon>
</IconStyle>
<LabelStyle>
<scale>1</scale>
</LabelStyle>
</Style>
<name>Rank 93</name>
<description><![CDATA[  <table width="500">
<tr><td>Country: <b>IRN</b></td><td>Flare ID: <b>vnfdb_2012_08630</b></td></tr>
<tr><td colspan="2">Combustion parameters:</td></tr>
<tr><td>Lat=34.007979, Lon=45.492447 deg.</td><td>Tavg=1805.87 K, RHsum=7.58408 MW</td></tr>
<tr><td>Freq. detect.=95.51 %</td><td>Area=31.81 m2</td></tr>
<tr><td>BCM=0.208</td><td>Type: upstream</td></tr>
</table>]]></description><Point>
<coordinates>45.492447,34.007979,0</coordinates>
</Point>
</Placemark>
<Placemark>
<Style id="highlightPlacemark94">
<IconStyle>
<scale>0.75</scale>
<Icon>
<href>http://maps.google.com/mapfiles/ms/micons/red.png</href>
</Icon>
</IconStyle>
<LabelStyle>
<scale>1</scale>
</LabelStyle>
</Style>
<name>Rank 94</name>
<description><![CDATA[  <table width="500">
<tr><td>Country: <b>VEN</b></td><td>Flare ID: <b>vnfdb_2012_05999</b></td></tr>
<tr><td colspan="2">Combustion parameters:</td></tr>
<tr><td>Lat=9.855106, Lon=-63.339525 deg.</td><td>Tavg=1747.99 K, RHsum=7.57784 MW</td></tr>
<tr><td>Freq. detect.=97.06 %</td><td>Area=45.62 m2</td></tr>
<tr><td>BCM=0.208</td><td>Type: upstream</td></tr>
</table>]]></description><Point>
<coordinates>-63.339525,9.855106,0</coordinates>
</Point>
</Placemark>
<Placemark>
<Style id="highlightPlacemark95">
<IconStyle>
<scale>0.75</scale>
<Icon>
<href>http://maps.google.com/mapfiles/ms/micons/red.png</href>
</Icon>
</IconStyle>
<LabelStyle>
<scale>1</scale>
</LabelStyle>
</Style>
<name>Rank 95</name>
<description><![CDATA[  <table width="500">
<tr><td>Country: <b>NGA</b></td><td>Flare ID: <b>vnfdb_2012_09659</b></td></tr>
<tr><td colspan="2">Combustion parameters:</td></tr>
<tr><td>Lat=4.305244, Lon=7.659543 deg.</td><td>Tavg=1665.81 K, RHsum=7.55238 MW</td></tr>
<tr><td>Freq. detect.=93.24 %</td><td>Area=58.70 m2</td></tr>
<tr><td>BCM=0.207</td><td>Type: upstream</td></tr>
</table>]]></description><Point>
<coordinates>7.659543,4.305244,0</coordinates>
</Point>
</Placemark>
<Placemark>
<Style id="highlightPlacemark96">
<IconStyle>
<scale>0.75</scale>
<Icon>
<href>http://maps.google.com/mapfiles/ms/micons/red.png</href>
</Icon>
</IconStyle>
<LabelStyle>
<scale>1</scale>
</LabelStyle>
</Style>
<name>Rank 96</name>
<description><![CDATA[  <table width="500">
<tr><td>Country: <b>COG</b></td><td>Flare ID: <b>vnfdb_2012_09874</b></td></tr>
<tr><td colspan="2">Combustion parameters:</td></tr>
<tr><td>Lat=-4.511431, Lon=12.049969 deg.</td><td>Tavg=1694.93 K, RHsum=7.54128 MW</td></tr>
<tr><td>Freq. detect.=96.00 %</td><td>Area=63.84 m2</td></tr>
<tr><td>BCM=0.207</td><td>Type: upstream</td></tr>
</table>]]></description><Point>
<coordinates>12.049969,-4.511431,0</coordinates>
</Point>
</Placemark>
<Placemark>
<Style id="highlightPlacemark97">
<IconStyle>
<scale>0.75</scale>
<Icon>
<href>http://maps.google.com/mapfiles/ms/micons/red.png</href>
</Icon>
</IconStyle>
<LabelStyle>
<scale>1</scale>
</LabelStyle>
</Style>
<name>Rank 97</name>
<description><![CDATA[  <table width="500">
<tr><td>Country: <b>NGA</b></td><td>Flare ID: <b>vnfdb_2012_07831</b></td></tr>
<tr><td colspan="2">Combustion parameters:</td></tr>
<tr><td>Lat=6.063678, Lon=5.585961 deg.</td><td>Tavg=1806.02 K, RHsum=7.46397 MW</td></tr>
<tr><td>Freq. detect.=96.61 %</td><td>Area=34.23 m2</td></tr>
<tr><td>BCM=0.205</td><td>Type: upstream</td></tr>
</table>]]></description><Point>
<coordinates>5.585961,6.063678,0</coordinates>
</Point>
</Placemark>
<Placemark>
<Style id="highlightPlacemark98">
<IconStyle>
<scale>0.75</scale>
<Icon>
<href>http://maps.google.com/mapfiles/kml/shapes/gas_stations.png</href>
</Icon>
</IconStyle>
<LabelStyle>
<scale>1</scale>
</LabelStyle>
</Style>
<name>Rank 98</name>
<description><![CDATA[  <table width="500">
<tr><td>Country: <b>IRN</b></td><td>Flare ID: <b>vnfdb_2012_09115</b></td></tr>
<tr><td colspan="2">Combustion parameters:</td></tr>
<tr><td>Lat=29.216136, Lon=50.312033 deg.</td><td>Tavg=1683.68 K, RHsum=7.44956 MW</td></tr>
<tr><td>Freq. detect.=96.42 %</td><td>Area=59.62 m2</td></tr>
<tr><td>BCM=0.204</td><td>Type: downstream</td></tr>
</table>]]></description><Point>
<coordinates>50.312033,29.216136,0</coordinates>
</Point>
</Placemark>
<Placemark>
<Style id="highlightPlacemark99">
<IconStyle>
<scale>0.75</scale>
<Icon>
<href>http://maps.google.com/mapfiles/ms/micons/red.png</href>
</Icon>
</IconStyle>
<LabelStyle>
<scale>1</scale>
</LabelStyle>
</Style>
<name>Rank 99</name>
<description><![CDATA[  <table width="500">
<tr><td>Country: <b>IRQ</b></td><td>Flare ID: <b>vnfdb_2012_08727</b></td></tr>
<tr><td colspan="2">Combustion parameters:</td></tr>
<tr><td>Lat=30.419540, Lon=47.607995 deg.</td><td>Tavg=1709.3 K, RHsum=7.39687 MW</td></tr>
<tr><td>Freq. detect.=96.80 %</td><td>Area=47.34 m2</td></tr>
<tr><td>BCM=0.203</td><td>Type: upstream</td></tr>
</table>]]></description><Point>
<coordinates>47.607995,30.419540,0</coordinates>
</Point>
</Placemark>
<Placemark>
<Style id="highlightPlacemark100">
<IconStyle>
<scale>0.75</scale>
<Icon>
<href>http://maps.google.com/mapfiles/ms/micons/red.png</href>
</Icon>
</IconStyle>
<LabelStyle>
<scale>1</scale>
</LabelStyle>
</Style>
<name>Rank 100</name>
<description><![CDATA[  <table width="500">
<tr><td>Country: <b>IRQ</b></td><td>Flare ID: <b>vnfdb_2012_08674</b></td></tr>
<tr><td colspan="2">Combustion parameters:</td></tr>
<tr><td>Lat=30.564990, Lon=47.102259 deg.</td><td>Tavg=1660.1 K, RHsum=7.30448 MW</td></tr>
<tr><td>Freq. detect.=87.94 %</td><td>Area=53.08 m2</td></tr>
<tr><td>BCM=0.2</td><td>Type: upstream</td></tr>
</table>]]></description><Point>
<coordinates>47.102259,30.564990,0</coordinates>
</Point>
</Placemark>
<Placemark>
<Style id="highlightPlacemark101">
<IconStyle>
<scale>0.75</scale>
<Icon>
<href>http://maps.google.com/mapfiles/ms/micons/red.png</href>
</Icon>
</IconStyle>
<LabelStyle>
<scale>0</scale>
</LabelStyle>
</Style>
<name>Rank 101</name>
<description><![CDATA[  <table width="500">
<tr><td>Country: <b>IRN</b></td><td>Flare ID: <b>vnfdb_2012_09113</b></td></tr>
<tr><td colspan="2">Combustion parameters:</td></tr>
<tr><td>Lat=30.349648, Lon=50.288882 deg.</td><td>Tavg=1620.66 K, RHsum=7.30223 MW</td></tr>
<tr><td>Freq. detect.=99.48 %</td><td>Area=61.02 m2</td></tr>
<tr><td>BCM=0.2</td><td>Type: upstream</td></tr>
</table>]]></description><Point>
<coordinates>50.288882,30.349648,0</coordinates>
</Point>
</Placemark>
<Placemark>
<Style id="highlightPlacemark102">
<IconStyle>
<scale>0.75</scale>
<Icon>
<href>http://maps.google.com/mapfiles/ms/micons/red.png</href>
</Icon>
</IconStyle>
<LabelStyle>
<scale>0</scale>
</LabelStyle>
</Style>
<name>Rank 102</name>
<description><![CDATA[  <table width="500">
<tr><td>Country: <b>RUS</b></td><td>Flare ID: <b>vnfdb_2012_10947</b></td></tr>
<tr><td colspan="2">Combustion parameters:</td></tr>
<tr><td>Lat=63.725212, Lon=79.491388 deg.</td><td>Tavg=1790.26 K, RHsum=7.28094 MW</td></tr>
<tr><td>Freq. detect.=87.98 %</td><td>Area=31.31 m2</td></tr>
<tr><td>BCM=0.199</td><td>Type: upstream</td></tr>
</table>]]></description><Point>
<coordinates>79.491388,63.725212,0</coordinates>
</Point>
</Placemark>
<Placemark>
<Style id="highlightPlacemark103">
<IconStyle>
<scale>0.75</scale>
<Icon>
<href>http://maps.google.com/mapfiles/ms/micons/red.png</href>
</Icon>
</IconStyle>
<LabelStyle>
<scale>0</scale>
</LabelStyle>
</Style>
<name>Rank 103</name>
<description><![CDATA[  <table width="500">
<tr><td>Country: <b>RUS</b></td><td>Flare ID: <b>vnfdb_2012_10413</b></td></tr>
<tr><td colspan="2">Combustion parameters:</td></tr>
<tr><td>Lat=60.467185, Lon=72.202758 deg.</td><td>Tavg=1829.31 K, RHsum=7.22571 MW</td></tr>
<tr><td>Freq. detect.=88.51 %</td><td>Area=28.69 m2</td></tr>
<tr><td>BCM=0.198</td><td>Type: upstream</td></tr>
</table>]]></description><Point>
<coordinates>72.202758,60.467185,0</coordinates>
</Point>
</Placemark>
<Placemark>
<Style id="highlightPlacemark104">
<IconStyle>
<scale>0.75</scale>
<Icon>
<href>http://maps.google.com/mapfiles/ms/micons/red.png</href>
</Icon>
</IconStyle>
<LabelStyle>
<scale>0</scale>
</LabelStyle>
</Style>
<name>Rank 104</name>
<description><![CDATA[  <table width="500">
<tr><td>Country: <b>DZA</b></td><td>Flare ID: <b>vnfdb_2012_07993</b></td></tr>
<tr><td colspan="2">Combustion parameters:</td></tr>
<tr><td>Lat=28.684977, Lon=7.193242 deg.</td><td>Tavg=1690.26 K, RHsum=7.16959 MW</td></tr>
<tr><td>Freq. detect.=98.79 %</td><td>Area=45.15 m2</td></tr>
<tr><td>BCM=0.196</td><td>Type: upstream</td></tr>
</table>]]></description><Point>
<coordinates>7.193242,28.684977,0</coordinates>
</Point>
</Placemark>
<Placemark>
<Style id="highlightPlacemark105">
<IconStyle>
<scale>0.75</scale>
<Icon>
<href>http://maps.google.com/mapfiles/ms/micons/red.png</href>
</Icon>
</IconStyle>
<LabelStyle>
<scale>0</scale>
</LabelStyle>
</Style>
<name>Rank 105</name>
<description><![CDATA[  <table width="500">
<tr><td>Country: <b>RUS</b></td><td>Flare ID: <b>vnfdb_2012_10358</b></td></tr>
<tr><td colspan="2">Combustion parameters:</td></tr>
<tr><td>Lat=60.889729, Lon=70.014499 deg.</td><td>Tavg=1790.61 K, RHsum=7.15283 MW</td></tr>
<tr><td>Freq. detect.=90.51 %</td><td>Area=36.69 m2</td></tr>
<tr><td>BCM=0.196</td><td>Type: upstream</td></tr>
</table>]]></description><Point>
<coordinates>70.014499,60.889729,0</coordinates>
</Point>
</Placemark>
<Placemark>
<Style id="highlightPlacemark106">
<IconStyle>
<scale>0.75</scale>
<Icon>
<href>http://maps.google.com/mapfiles/ms/micons/red.png</href>
</Icon>
</IconStyle>
<LabelStyle>
<scale>0</scale>
</LabelStyle>
</Style>
<name>Rank 106</name>
<description><![CDATA[  <table width="500">
<tr><td>Country: <b>RUS</b></td><td>Flare ID: <b>vnfdb_2012_10803</b></td></tr>
<tr><td colspan="2">Combustion parameters:</td></tr>
<tr><td>Lat=66.210658, Lon=77.236758 deg.</td><td>Tavg=1718.81 K, RHsum=7.13582 MW</td></tr>
<tr><td>Freq. detect.=87.02 %</td><td>Area=47.03 m2</td></tr>
<tr><td>BCM=0.196</td><td>Type: upstream</td></tr>
</table>]]></description><Point>
<coordinates>77.236758,66.210658,0</coordinates>
</Point>
</Placemark>
<Placemark>
<Style id="highlightPlacemark107">
<IconStyle>
<scale>0.75</scale>
<Icon>
<href>http://maps.google.com/mapfiles/ms/micons/red.png</href>
</Icon>
</IconStyle>
<LabelStyle>
<scale>0</scale>
</LabelStyle>
</Style>
<name>Rank 107</name>
<description><![CDATA[  <table width="500">
<tr><td>Country: <b>VEN</b></td><td>Flare ID: <b>vnfdb_2012_05920</b></td></tr>
<tr><td colspan="2">Combustion parameters:</td></tr>
<tr><td>Lat=8.676900, Lon=-64.820355 deg.</td><td>Tavg=1798.83 K, RHsum=7.05435 MW</td></tr>
<tr><td>Freq. detect.=98.23 %</td><td>Area=29.42 m2</td></tr>
<tr><td>BCM=0.193</td><td>Type: upstream</td></tr>
</table>]]></description><Point>
<coordinates>-64.820355,8.676900,0</coordinates>
</Point>
</Placemark>
<Placemark>
<Style id="highlightPlacemark108">
<IconStyle>
<scale>0.75</scale>
<Icon>
<href>http://maps.google.com/mapfiles/ms/micons/red.png</href>
</Icon>
</IconStyle>
<LabelStyle>
<scale>0</scale>
</LabelStyle>
</Style>
<name>Rank 108</name>
<description><![CDATA[  <table width="500">
<tr><td>Country: <b>LBY</b></td><td>Flare ID: <b>vnfdb_2012_08213</b></td></tr>
<tr><td colspan="2">Combustion parameters:</td></tr>
<tr><td>Lat=28.904626, Lon=20.954787 deg.</td><td>Tavg=1610.53 K, RHsum=6.98506 MW</td></tr>
<tr><td>Freq. detect.=97.58 %</td><td>Area=53.81 m2</td></tr>
<tr><td>BCM=0.191</td><td>Type: upstream</td></tr>
</table>]]></description><Point>
<coordinates>20.954787,28.904626,0</coordinates>
</Point>
</Placemark>
<Placemark>
<Style id="highlightPlacemark109">
<IconStyle>
<scale>0.75</scale>
<Icon>
<href>http://maps.google.com/mapfiles/ms/micons/red.png</href>
</Icon>
</IconStyle>
<LabelStyle>
<scale>0</scale>
</LabelStyle>
</Style>
<name>Rank 109</name>
<description><![CDATA[  <table width="500">
<tr><td>Country: <b>VEN</b></td><td>Flare ID: <b>vnfdb_2012_05989</b></td></tr>
<tr><td colspan="2">Combustion parameters:</td></tr>
<tr><td>Lat=9.666192, Lon=-63.503799 deg.</td><td>Tavg=1787.49 K, RHsum=6.98272 MW</td></tr>
<tr><td>Freq. detect.=95.48 %</td><td>Area=29.36 m2</td></tr>
<tr><td>BCM=0.191</td><td>Type: upstream</td></tr>
</table>]]></description><Point>
<coordinates>-63.503799,9.666192,0</coordinates>
</Point>
</Placemark>
<Placemark>
<Style id="highlightPlacemark110">
<IconStyle>
<scale>0.75</scale>
<Icon>
<href>http://maps.google.com/mapfiles/ms/micons/red.png</href>
</Icon>
</IconStyle>
<LabelStyle>
<scale>0</scale>
</LabelStyle>
</Style>
<name>Rank 110</name>
<description><![CDATA[  <table width="500">
<tr><td>Country: <b>NGA</b></td><td>Flare ID: <b>vnfdb_2012_09698</b></td></tr>
<tr><td colspan="2">Combustion parameters:</td></tr>
<tr><td>Lat=4.128482, Lon=8.095896 deg.</td><td>Tavg=1667.09 K, RHsum=6.97915 MW</td></tr>
<tr><td>Freq. detect.=95.23 %</td><td>Area=44.13 m2</td></tr>
<tr><td>BCM=0.191</td><td>Type: upstream</td></tr>
</table>]]></description><Point>
<coordinates>8.095896,4.128482,0</coordinates>
</Point>
</Placemark>
<Placemark>
<Style id="highlightPlacemark111">
<IconStyle>
<scale>0.75</scale>
<Icon>
<href>http://maps.google.com/mapfiles/ms/micons/red.png</href>
</Icon>
</IconStyle>
<LabelStyle>
<scale>0</scale>
</LabelStyle>
</Style>
<name>Rank 111</name>
<description><![CDATA[  <table width="500">
<tr><td>Country: <b>IRN</b></td><td>Flare ID: <b>vnfdb_2012_08984</b></td></tr>
<tr><td colspan="2">Combustion parameters:</td></tr>
<tr><td>Lat=31.136230, Lon=49.320306 deg.</td><td>Tavg=1672.23 K, RHsum=6.97363 MW</td></tr>
<tr><td>Freq. detect.=96.41 %</td><td>Area=47.18 m2</td></tr>
<tr><td>BCM=0.191</td><td>Type: upstream</td></tr>
</table>]]></description><Point>
<coordinates>49.320306,31.136230,0</coordinates>
</Point>
</Placemark>
<Placemark>
<Style id="highlightPlacemark112">
<IconStyle>
<scale>0.75</scale>
<Icon>
<href>http://maps.google.com/mapfiles/ms/micons/red.png</href>
</Icon>
</IconStyle>
<LabelStyle>
<scale>0</scale>
</LabelStyle>
</Style>
<name>Rank 112</name>
<description><![CDATA[  <table width="500">
<tr><td>Country: <b>TKM</b></td><td>Flare ID: <b>vnfdb_2012_07387</b></td></tr>
<tr><td colspan="2">Combustion parameters:</td></tr>
<tr><td>Lat=40.170305, Lon=52.768356 deg.</td><td>Tavg=1760.42 K, RHsum=6.92172 MW</td></tr>
<tr><td>Freq. detect.=89.53 %</td><td>Area=36.76 m2</td></tr>
<tr><td>BCM=0.19</td><td>Type: upstream</td></tr>
</table>]]></description><Point>
<coordinates>52.768356,40.170305,0</coordinates>
</Point>
</Placemark>
<Placemark>
<Style id="highlightPlacemark113">
<IconStyle>
<scale>0.75</scale>
<Icon>
<href>http://maps.google.com/mapfiles/ms/micons/red.png</href>
</Icon>
</IconStyle>
<LabelStyle>
<scale>0</scale>
</LabelStyle>
</Style>
<name>Rank 113</name>
<description><![CDATA[  <table width="500">
<tr><td>Country: <b>TKM</b></td><td>Flare ID: <b>vnfdb_2012_11464</b></td></tr>
<tr><td colspan="2">Combustion parameters:</td></tr>
<tr><td>Lat=38.737365, Lon=64.619188 deg.</td><td>Tavg=1813.72 K, RHsum=6.88929 MW</td></tr>
<tr><td>Freq. detect.=95.08 %</td><td>Area=24.89 m2</td></tr>
<tr><td>BCM=0.189</td><td>Type: upstream</td></tr>
</table>]]></description><Point>
<coordinates>64.619188,38.737365,0</coordinates>
</Point>
</Placemark>
<Placemark>
<Style id="highlightPlacemark114">
<IconStyle>
<scale>0.75</scale>
<Icon>
<href>http://maps.google.com/mapfiles/ms/micons/red.png</href>
</Icon>
</IconStyle>
<LabelStyle>
<scale>0</scale>
</LabelStyle>
</Style>
<name>Rank 114</name>
<description><![CDATA[  <table width="500">
<tr><td>Country: <b>LBY</b></td><td>Flare ID: <b>vnfdb_2012_08132</b></td></tr>
<tr><td colspan="2">Combustion parameters:</td></tr>
<tr><td>Lat=26.579921, Lon=12.209898 deg.</td><td>Tavg=1657.62 K, RHsum=6.88119 MW</td></tr>
<tr><td>Freq. detect.=96.07 %</td><td>Area=47.60 m2</td></tr>
<tr><td>BCM=0.189</td><td>Type: upstream</td></tr>
</table>]]></description><Point>
<coordinates>12.209898,26.579921,0</coordinates>
</Point>
</Placemark>
<Placemark>
<Style id="highlightPlacemark115">
<IconStyle>
<scale>0.75</scale>
<Icon>
<href>http://maps.google.com/mapfiles/ms/micons/red.png</href>
</Icon>
</IconStyle>
<LabelStyle>
<scale>0</scale>
</LabelStyle>
</Style>
<name>Rank 115</name>
<description><![CDATA[  <table width="500">
<tr><td>Country: <b>UZB</b></td><td>Flare ID: <b>vnfdb_2012_11461</b></td></tr>
<tr><td colspan="2">Combustion parameters:</td></tr>
<tr><td>Lat=39.220063, Lon=64.606958 deg.</td><td>Tavg=1764.12 K, RHsum=6.8611 MW</td></tr>
<tr><td>Freq. detect.=97.35 %</td><td>Area=28.08 m2</td></tr>
<tr><td>BCM=0.188</td><td>Type: upstream</td></tr>
</table>]]></description><Point>
<coordinates>64.606958,39.220063,0</coordinates>
</Point>
</Placemark>
<Placemark>
<Style id="highlightPlacemark116">
<IconStyle>
<scale>0.75</scale>
<Icon>
<href>http://maps.google.com/mapfiles/ms/micons/red.png</href>
</Icon>
</IconStyle>
<LabelStyle>
<scale>0</scale>
</LabelStyle>
</Style>
<name>Rank 116</name>
<description><![CDATA[  <table width="500">
<tr><td>Country: <b>RUS</b></td><td>Flare ID: <b>vnfdb_2012_10371</b></td></tr>
<tr><td colspan="2">Combustion parameters:</td></tr>
<tr><td>Lat=61.372112, Lon=70.416001 deg.</td><td>Tavg=1684.17 K, RHsum=6.85727 MW</td></tr>
<tr><td>Freq. detect.=88.47 %</td><td>Area=39.42 m2</td></tr>
<tr><td>BCM=0.188</td><td>Type: upstream</td></tr>
</table>]]></description><Point>
<coordinates>70.416001,61.372112,0</coordinates>
</Point>
</Placemark>
<Placemark>
<Style id="highlightPlacemark117">
<IconStyle>
<scale>0.75</scale>
<Icon>
<href>http://maps.google.com/mapfiles/ms/micons/red.png</href>
</Icon>
</IconStyle>
<LabelStyle>
<scale>0</scale>
</LabelStyle>
</Style>
<name>Rank 117</name>
<description><![CDATA[  <table width="500">
<tr><td>Country: <b>IRN</b></td><td>Flare ID: <b>vnfdb_2012_08975</b></td></tr>
<tr><td colspan="2">Combustion parameters:</td></tr>
<tr><td>Lat=31.321814, Lon=49.280744 deg.</td><td>Tavg=1683.71 K, RHsum=6.85665 MW</td></tr>
<tr><td>Freq. detect.=93.97 %</td><td>Area=43.12 m2</td></tr>
<tr><td>BCM=0.188</td><td>Type: upstream</td></tr>
</table>]]></description><Point>
<coordinates>49.280744,31.321814,0</coordinates>
</Point>
</Placemark>
<Placemark>
<Style id="highlightPlacemark118">
<IconStyle>
<scale>0.75</scale>
<Icon>
<href>http://maps.google.com/mapfiles/ms/micons/red.png</href>
</Icon>
</IconStyle>
<LabelStyle>
<scale>0</scale>
</LabelStyle>
</Style>
<name>Rank 118</name>
<description><![CDATA[  <table width="500">
<tr><td>Country: <b>RUS</b></td><td>Flare ID: <b>vnfdb_2012_10365</b></td></tr>
<tr><td colspan="2">Combustion parameters:</td></tr>
<tr><td>Lat=61.006262, Lon=70.254158 deg.</td><td>Tavg=1760.36 K, RHsum=6.82262 MW</td></tr>
<tr><td>Freq. detect.=89.59 %</td><td>Area=26.82 m2</td></tr>
<tr><td>BCM=0.187</td><td>Type: upstream</td></tr>
</table>]]></description><Point>
<coordinates>70.254158,61.006262,0</coordinates>
</Point>
</Placemark>
<Placemark>
<Style id="highlightPlacemark119">
<IconStyle>
<scale>0.75</scale>
<Icon>
<href>http://maps.google.com/mapfiles/ms/micons/red.png</href>
</Icon>
</IconStyle>
<LabelStyle>
<scale>0</scale>
</LabelStyle>
</Style>
<name>Rank 119</name>
<description><![CDATA[  <table width="500">
<tr><td>Country: <b>IRN</b></td><td>Flare ID: <b>vnfdb_2012_09075</b></td></tr>
<tr><td colspan="2">Combustion parameters:</td></tr>
<tr><td>Lat=30.720938, Lon=49.824036 deg.</td><td>Tavg=1739.18 K, RHsum=6.80819 MW</td></tr>
<tr><td>Freq. detect.=85.55 %</td><td>Area=37.92 m2</td></tr>
<tr><td>BCM=0.187</td><td>Type: upstream</td></tr>
</table>]]></description><Point>
<coordinates>49.824036,30.720938,0</coordinates>
</Point>
</Placemark>
<Placemark>
<Style id="highlightPlacemark120">
<IconStyle>
<scale>0.75</scale>
<Icon>
<href>http://maps.google.com/mapfiles/ms/micons/red.png</href>
</Icon>
</IconStyle>
<LabelStyle>
<scale>0</scale>
</LabelStyle>
</Style>
<name>Rank 120</name>
<description><![CDATA[  <table width="500">
<tr><td>Country: <b>DZA</b></td><td>Flare ID: <b>vnfdb_2012_07848</b></td></tr>
<tr><td colspan="2">Combustion parameters:</td></tr>
<tr><td>Lat=31.694867, Lon=5.805831 deg.</td><td>Tavg=1634.73 K, RHsum=6.75276 MW</td></tr>
<tr><td>Freq. detect.=94.42 %</td><td>Area=67.28 m2</td></tr>
<tr><td>BCM=0.185</td><td>Type: upstream</td></tr>
</table>]]></description><Point>
<coordinates>5.805831,31.694867,0</coordinates>
</Point>
</Placemark>
<Placemark>
<Style id="highlightPlacemark121">
<IconStyle>
<scale>0.75</scale>
<Icon>
<href>http://maps.google.com/mapfiles/ms/micons/red.png</href>
</Icon>
</IconStyle>
<LabelStyle>
<scale>0</scale>
</LabelStyle>
</Style>
<name>Rank 121</name>
<description><![CDATA[  <table width="500">
<tr><td>Country: <b>LBY</b></td><td>Flare ID: <b>vnfdb_2012_08248</b></td></tr>
<tr><td colspan="2">Combustion parameters:</td></tr>
<tr><td>Lat=27.648626, Lon=22.480817 deg.</td><td>Tavg=1640.52 K, RHsum=6.72127 MW</td></tr>
<tr><td>Freq. detect.=97.07 %</td><td>Area=49.61 m2</td></tr>
<tr><td>BCM=0.184</td><td>Type: upstream</td></tr>
</table>]]></description><Point>
<coordinates>22.480817,27.648626,0</coordinates>
</Point>
</Placemark>
<Placemark>
<Style id="highlightPlacemark122">
<IconStyle>
<scale>0.75</scale>
<Icon>
<href>http://maps.google.com/mapfiles/ms/micons/red.png</href>
</Icon>
</IconStyle>
<LabelStyle>
<scale>0</scale>
</LabelStyle>
</Style>
<name>Rank 122</name>
<description><![CDATA[  <table width="500">
<tr><td>Country: <b>NGA</b></td><td>Flare ID: <b>vnfdb_2012_07715</b></td></tr>
<tr><td colspan="2">Combustion parameters:</td></tr>
<tr><td>Lat=5.359838, Lon=4.341308 deg.</td><td>Tavg=1634.55 K, RHsum=6.70723 MW</td></tr>
<tr><td>Freq. detect.=96.67 %</td><td>Area=45.86 m2</td></tr>
<tr><td>BCM=0.184</td><td>Type: upstream</td></tr>
</table>]]></description><Point>
<coordinates>4.341308,5.359838,0</coordinates>
</Point>
</Placemark>
<Placemark>
<Style id="highlightPlacemark123">
<IconStyle>
<scale>0.75</scale>
<Icon>
<href>http://maps.google.com/mapfiles/ms/micons/red.png</href>
</Icon>
</IconStyle>
<LabelStyle>
<scale>0</scale>
</LabelStyle>
</Style>
<name>Rank 123</name>
<description><![CDATA[  <table width="500">
<tr><td>Country: <b>RUS</b></td><td>Flare ID: <b>vnfdb_2012_10958</b></td></tr>
<tr><td colspan="2">Combustion parameters:</td></tr>
<tr><td>Lat=64.249465, Lon=79.571803 deg.</td><td>Tavg=1815.46 K, RHsum=6.70575 MW</td></tr>
<tr><td>Freq. detect.=89.05 %</td><td>Area=35.98 m2</td></tr>
<tr><td>BCM=0.184</td><td>Type: upstream</td></tr>
</table>]]></description><Point>
<coordinates>79.571803,64.249465,0</coordinates>
</Point>
</Placemark>
<Placemark>
<Style id="highlightPlacemark124">
<IconStyle>
<scale>0.75</scale>
<Icon>
<href>http://maps.google.com/mapfiles/ms/micons/red.png</href>
</Icon>
</IconStyle>
<LabelStyle>
<scale>0</scale>
</LabelStyle>
</Style>
<name>Rank 124</name>
<description><![CDATA[  <table width="500">
<tr><td>Country: <b>GNQ</b></td><td>Flare ID: <b>vnfdb_2012_09703</b></td></tr>
<tr><td colspan="2">Combustion parameters:</td></tr>
<tr><td>Lat=3.855015, Lon=8.109054 deg.</td><td>Tavg=1692.52 K, RHsum=6.70189 MW</td></tr>
<tr><td>Freq. detect.=95.67 %</td><td>Area=42.43 m2</td></tr>
<tr><td>BCM=0.184</td><td>Type: upstream</td></tr>
</table>]]></description><Point>
<coordinates>8.109054,3.855015,0</coordinates>
</Point>
</Placemark>
<Placemark>
<Style id="highlightPlacemark125">
<IconStyle>
<scale>0.75</scale>
<Icon>
<href>http://maps.google.com/mapfiles/ms/micons/red.png</href>
</Icon>
</IconStyle>
<LabelStyle>
<scale>0</scale>
</LabelStyle>
</Style>
<name>Rank 125</name>
<description><![CDATA[  <table width="500">
<tr><td>Country: <b>LBY</b></td><td>Flare ID: <b>vnfdb_2012_08250</b></td></tr>
<tr><td colspan="2">Combustion parameters:</td></tr>
<tr><td>Lat=27.644337, Lon=22.501055 deg.</td><td>Tavg=1642.39 K, RHsum=6.68752 MW</td></tr>
<tr><td>Freq. detect.=96.62 %</td><td>Area=48.17 m2</td></tr>
<tr><td>BCM=0.183</td><td>Type: upstream</td></tr>
</table>]]></description><Point>
<coordinates>22.501055,27.644337,0</coordinates>
</Point>
</Placemark>
<Placemark>
<Style id="highlightPlacemark126">
<IconStyle>
<scale>0.75</scale>
<Icon>
<href>http://maps.google.com/mapfiles/kml/shapes/gas_stations.png</href>
</Icon>
</IconStyle>
<LabelStyle>
<scale>0</scale>
</LabelStyle>
</Style>
<name>Rank 126</name>
<description><![CDATA[  <table width="500">
<tr><td>Country: <b>VEN</b></td><td>Flare ID: <b>vnfdb_2012_05897</b></td></tr>
<tr><td colspan="2">Combustion parameters:</td></tr>
<tr><td>Lat=11.624517, Lon=-70.226989 deg.</td><td>Tavg=1649.27 K, RHsum=6.67587 MW</td></tr>
<tr><td>Freq. detect.=98.45 %</td><td>Area=45.53 m2</td></tr>
<tr><td>BCM=0.183</td><td>Type: downstream</td></tr>
</table>]]></description><Point>
<coordinates>-70.226989,11.624517,0</coordinates>
</Point>
</Placemark>
<Placemark>
<Style id="highlightPlacemark127">
<IconStyle>
<scale>0.75</scale>
<Icon>
<href>http://maps.google.com/mapfiles/ms/micons/red.png</href>
</Icon>
</IconStyle>
<LabelStyle>
<scale>0</scale>
</LabelStyle>
</Style>
<name>Rank 127</name>
<description><![CDATA[  <table width="500">
<tr><td>Country: <b>DZA</b></td><td>Flare ID: <b>vnfdb_2012_07871</b></td></tr>
<tr><td colspan="2">Combustion parameters:</td></tr>
<tr><td>Lat=31.696539, Lon=5.964429 deg.</td><td>Tavg=1744.68 K, RHsum=6.6326 MW</td></tr>
<tr><td>Freq. detect.=96.82 %</td><td>Area=32.97 m2</td></tr>
<tr><td>BCM=0.182</td><td>Type: upstream</td></tr>
</table>]]></description><Point>
<coordinates>5.964429,31.696539,0</coordinates>
</Point>
</Placemark>
<Placemark>
<Style id="highlightPlacemark128">
<IconStyle>
<scale>0.75</scale>
<Icon>
<href>http://maps.google.com/mapfiles/ms/micons/red.png</href>
</Icon>
</IconStyle>
<LabelStyle>
<scale>0</scale>
</LabelStyle>
</Style>
<name>Rank 128</name>
<description><![CDATA[  <table width="500">
<tr><td>Country: <b>VEN</b></td><td>Flare ID: <b>vnfdb_2012_05986</b></td></tr>
<tr><td colspan="2">Combustion parameters:</td></tr>
<tr><td>Lat=9.703358, Lon=-63.529152 deg.</td><td>Tavg=1721.99 K, RHsum=6.63059 MW</td></tr>
<tr><td>Freq. detect.=98.46 %</td><td>Area=37.39 m2</td></tr>
<tr><td>BCM=0.182</td><td>Type: upstream</td></tr>
</table>]]></description><Point>
<coordinates>-63.529152,9.703358,0</coordinates>
</Point>
</Placemark>
<Placemark>
<Style id="highlightPlacemark129">
<IconStyle>
<scale>0.75</scale>
<Icon>
<href>http://maps.google.com/mapfiles/ms/micons/red.png</href>
</Icon>
</IconStyle>
<LabelStyle>
<scale>0</scale>
</LabelStyle>
</Style>
<name>Rank 129</name>
<description><![CDATA[  <table width="500">
<tr><td>Country: <b>RUS</b></td><td>Flare ID: <b>vnfdb_2012_10303</b></td></tr>
<tr><td colspan="2">Combustion parameters:</td></tr>
<tr><td>Lat=61.651939, Lon=67.067043 deg.</td><td>Tavg=1721.47 K, RHsum=6.62431 MW</td></tr>
<tr><td>Freq. detect.=87.17 %</td><td>Area=39.52 m2</td></tr>
<tr><td>BCM=0.182</td><td>Type: upstream</td></tr>
</table>]]></description><Point>
<coordinates>67.067043,61.651939,0</coordinates>
</Point>
</Placemark>
<Placemark>
<Style id="highlightPlacemark130">
<IconStyle>
<scale>0.75</scale>
<Icon>
<href>http://maps.google.com/mapfiles/ms/micons/red.png</href>
</Icon>
</IconStyle>
<LabelStyle>
<scale>0</scale>
</LabelStyle>
</Style>
<name>Rank 130</name>
<description><![CDATA[  <table width="500">
<tr><td>Country: <b>IRQ</b></td><td>Flare ID: <b>vnfdb_2012_08617</b></td></tr>
<tr><td colspan="2">Combustion parameters:</td></tr>
<tr><td>Lat=35.138622, Lon=44.825140 deg.</td><td>Tavg=1746.7 K, RHsum=6.57817 MW</td></tr>
<tr><td>Freq. detect.=95.93 %</td><td>Area=32.35 m2</td></tr>
<tr><td>BCM=0.18</td><td>Type: upstream</td></tr>
</table>]]></description><Point>
<coordinates>44.825140,35.138622,0</coordinates>
</Point>
</Placemark>
<Placemark>
<Style id="highlightPlacemark131">
<IconStyle>
<scale>0.75</scale>
<Icon>
<href>http://maps.google.com/mapfiles/ms/micons/red.png</href>
</Icon>
</IconStyle>
<LabelStyle>
<scale>0</scale>
</LabelStyle>
</Style>
<name>Rank 131</name>
<description><![CDATA[  <table width="500">
<tr><td>Country: <b>NGA</b></td><td>Flare ID: <b>vnfdb_2012_07955</b></td></tr>
<tr><td colspan="2">Combustion parameters:</td></tr>
<tr><td>Lat=5.387123, Lon=6.656765 deg.</td><td>Tavg=1646.04 K, RHsum=6.53102 MW</td></tr>
<tr><td>Freq. detect.=95.64 %</td><td>Area=55.45 m2</td></tr>
<tr><td>BCM=0.179</td><td>Type: upstream</td></tr>
</table>]]></description><Point>
<coordinates>6.656765,5.387123,0</coordinates>
</Point>
</Placemark>
<Placemark>
<Style id="highlightPlacemark132">
<IconStyle>
<scale>0.75</scale>
<Icon>
<href>http://maps.google.com/mapfiles/kml/shapes/gas_stations.png</href>
</Icon>
</IconStyle>
<LabelStyle>
<scale>0</scale>
</LabelStyle>
</Style>
<name>Rank 132</name>
<description><![CDATA[  <table width="500">
<tr><td>Country: <b>IRN</b></td><td>Flare ID: <b>vnfdb_2012_09282</b></td></tr>
<tr><td colspan="2">Combustion parameters:</td></tr>
<tr><td>Lat=27.520147, Lon=52.594299 deg.</td><td>Tavg=1735.44 K, RHsum=6.42761 MW</td></tr>
<tr><td>Freq. detect.=99.55 %</td><td>Area=34.70 m2</td></tr>
<tr><td>BCM=0.176</td><td>Type: downstream</td></tr>
</table>]]></description><Point>
<coordinates>52.594299,27.520147,0</coordinates>
</Point>
</Placemark>
<Placemark>
<Style id="highlightPlacemark133">
<IconStyle>
<scale>0.75</scale>
<Icon>
<href>http://maps.google.com/mapfiles/kml/shapes/gas_stations.png</href>
</Icon>
</IconStyle>
<LabelStyle>
<scale>0</scale>
</LabelStyle>
</Style>
<name>Rank 133</name>
<description><![CDATA[  <table width="500">
<tr><td>Country: <b>SAU</b></td><td>Flare ID: <b>vnfdb_2012_08841</b></td></tr>
<tr><td colspan="2">Combustion parameters:</td></tr>
<tr><td>Lat=28.396627, Lon=48.532953 deg.</td><td>Tavg=1770.38 K, RHsum=6.40017 MW</td></tr>
<tr><td>Freq. detect.=96.70 %</td><td>Area=32.12 m2</td></tr>
<tr><td>BCM=0.175</td><td>Type: downstream</td></tr>
</table>]]></description><Point>
<coordinates>48.532953,28.396627,0</coordinates>
</Point>
</Placemark>
<Placemark>
<Style id="highlightPlacemark134">
<IconStyle>
<scale>0.75</scale>
<Icon>
<href>http://maps.google.com/mapfiles/ms/micons/red.png</href>
</Icon>
</IconStyle>
<LabelStyle>
<scale>0</scale>
</LabelStyle>
</Style>
<name>Rank 134</name>
<description><![CDATA[  <table width="500">
<tr><td>Country: <b>UZB</b></td><td>Flare ID: <b>vnfdb_2012_11463</b></td></tr>
<tr><td colspan="2">Combustion parameters:</td></tr>
<tr><td>Lat=38.812302, Lon=64.619526 deg.</td><td>Tavg=1776.01 K, RHsum=6.38454 MW</td></tr>
<tr><td>Freq. detect.=96.62 %</td><td>Area=26.76 m2</td></tr>
<tr><td>BCM=0.175</td><td>Type: upstream</td></tr>
</table>]]></description><Point>
<coordinates>64.619526,38.812302,0</coordinates>
</Point>
</Placemark>
<Placemark>
<Style id="highlightPlacemark135">
<IconStyle>
<scale>0.75</scale>
<Icon>
<href>http://maps.google.com/mapfiles/ms/micons/red.png</href>
</Icon>
</IconStyle>
<LabelStyle>
<scale>0</scale>
</LabelStyle>
</Style>
<name>Rank 135</name>
<description><![CDATA[  <table width="500">
<tr><td>Country: <b>IRN</b></td><td>Flare ID: <b>vnfdb_2012_09060</b></td></tr>
<tr><td colspan="2">Combustion parameters:</td></tr>
<tr><td>Lat=29.943782, Lon=49.685684 deg.</td><td>Tavg=1661.28 K, RHsum=6.33684 MW</td></tr>
<tr><td>Freq. detect.=95.01 %</td><td>Area=42.80 m2</td></tr>
<tr><td>BCM=0.174</td><td>Type: upstream</td></tr>
</table>]]></description><Point>
<coordinates>49.685684,29.943782,0</coordinates>
</Point>
</Placemark>
<Placemark>
<Style id="highlightPlacemark136">
<IconStyle>
<scale>0.75</scale>
<Icon>
<href>http://maps.google.com/mapfiles/kml/shapes/gas_stations.png</href>
</Icon>
</IconStyle>
<LabelStyle>
<scale>0</scale>
</LabelStyle>
</Style>
<name>Rank 136</name>
<description><![CDATA[  <table width="500">
<tr><td>Country: <b>MEX</b></td><td>Flare ID: <b>vnfdb_2012_05374</b></td></tr>
<tr><td colspan="2">Combustion parameters:</td></tr>
<tr><td>Lat=16.202293, Lon=-95.171555 deg.</td><td>Tavg=1788.58 K, RHsum=6.32066 MW</td></tr>
<tr><td>Freq. detect.=100.00 %</td><td>Area=24.37 m2</td></tr>
<tr><td>BCM=0.173</td><td>Type: downstream</td></tr>
</table>]]></description><Point>
<coordinates>-95.171555,16.202293,0</coordinates>
</Point>
</Placemark>
<Placemark>
<Style id="highlightPlacemark137">
<IconStyle>
<scale>0.75</scale>
<Icon>
<href>http://maps.google.com/mapfiles/ms/micons/red.png</href>
</Icon>
</IconStyle>
<LabelStyle>
<scale>0</scale>
</LabelStyle>
</Style>
<name>Rank 137</name>
<description><![CDATA[  <table width="500">
<tr><td>Country: <b>MYS</b></td><td>Flare ID: <b>vnfdb_2012_11930</b></td></tr>
<tr><td colspan="2">Combustion parameters:</td></tr>
<tr><td>Lat=5.535729, Lon=105.023007 deg.</td><td>Tavg=1696.7 K, RHsum=6.18215 MW</td></tr>
<tr><td>Freq. detect.=91.45 %</td><td>Area=35.56 m2</td></tr>
<tr><td>BCM=0.169</td><td>Type: upstream</td></tr>
</table>]]></description><Point>
<coordinates>105.023007,5.535729,0</coordinates>
</Point>
</Placemark>
<Placemark>
<Style id="highlightPlacemark138">
<IconStyle>
<scale>0.75</scale>
<Icon>
<href>http://maps.google.com/mapfiles/ms/micons/red.png</href>
</Icon>
</IconStyle>
<LabelStyle>
<scale>0</scale>
</LabelStyle>
</Style>
<name>Rank 138</name>
<description><![CDATA[  <table width="500">
<tr><td>Country: <b>IRN</b></td><td>Flare ID: <b>vnfdb_2012_08845</b></td></tr>
<tr><td colspan="2">Combustion parameters:</td></tr>
<tr><td>Lat=31.407547, Lon=48.647592 deg.</td><td>Tavg=1659.09 K, RHsum=6.1322 MW</td></tr>
<tr><td>Freq. detect.=95.49 %</td><td>Area=40.85 m2</td></tr>
<tr><td>BCM=0.168</td><td>Type: upstream</td></tr>
</table>]]></description><Point>
<coordinates>48.647592,31.407547,0</coordinates>
</Point>
</Placemark>
<Placemark>
<Style id="highlightPlacemark139">
<IconStyle>
<scale>0.75</scale>
<Icon>
<href>http://maps.google.com/mapfiles/ms/micons/red.png</href>
</Icon>
</IconStyle>
<LabelStyle>
<scale>0</scale>
</LabelStyle>
</Style>
<name>Rank 139</name>
<description><![CDATA[  <table width="500">
<tr><td>Country: <b>LBY</b></td><td>Flare ID: <b>vnfdb_2012_08212</b></td></tr>
<tr><td colspan="2">Combustion parameters:</td></tr>
<tr><td>Lat=29.038488, Lon=20.784961 deg.</td><td>Tavg=1669.46 K, RHsum=6.11991 MW</td></tr>
<tr><td>Freq. detect.=95.31 %</td><td>Area=35.66 m2</td></tr>
<tr><td>BCM=0.168</td><td>Type: upstream</td></tr>
</table>]]></description><Point>
<coordinates>20.784961,29.038488,0</coordinates>
</Point>
</Placemark>
<Placemark>
<Style id="highlightPlacemark140">
<IconStyle>
<scale>0.75</scale>
<Icon>
<href>http://maps.google.com/mapfiles/ms/micons/red.png</href>
</Icon>
</IconStyle>
<LabelStyle>
<scale>0</scale>
</LabelStyle>
</Style>
<name>Rank 140</name>
<description><![CDATA[  <table width="500">
<tr><td>Country: <b>RUS</b></td><td>Flare ID: <b>vnfdb_2012_10969</b></td></tr>
<tr><td colspan="2">Combustion parameters:</td></tr>
<tr><td>Lat=63.882374, Lon=79.687599 deg.</td><td>Tavg=1793.69 K, RHsum=6.11249 MW</td></tr>
<tr><td>Freq. detect.=83.49 %</td><td>Area=25.68 m2</td></tr>
<tr><td>BCM=0.167</td><td>Type: upstream</td></tr>
</table>]]></description><Point>
<coordinates>79.687599,63.882374,0</coordinates>
</Point>
</Placemark>
<Placemark>
<Style id="highlightPlacemark141">
<IconStyle>
<scale>0.75</scale>
<Icon>
<href>http://maps.google.com/mapfiles/ms/micons/red.png</href>
</Icon>
</IconStyle>
<LabelStyle>
<scale>0</scale>
</LabelStyle>
</Style>
<name>Rank 141</name>
<description><![CDATA[  <table width="500">
<tr><td>Country: <b>RUS</b></td><td>Flare ID: <b>vnfdb_2012_07223</b></td></tr>
<tr><td colspan="2">Combustion parameters:</td></tr>
<tr><td>Lat=46.776412, Lon=48.124373 deg.</td><td>Tavg=1762.54 K, RHsum=6.05903 MW</td></tr>
<tr><td>Freq. detect.=94.50 %</td><td>Area=28.71 m2</td></tr>
<tr><td>BCM=0.166</td><td>Type: upstream</td></tr>
</table>]]></description><Point>
<coordinates>48.124373,46.776412,0</coordinates>
</Point>
</Placemark>
<Placemark>
<Style id="highlightPlacemark142">
<IconStyle>
<scale>0.75</scale>
<Icon>
<href>http://maps.google.com/mapfiles/ms/micons/red.png</href>
</Icon>
</IconStyle>
<LabelStyle>
<scale>0</scale>
</LabelStyle>
</Style>
<name>Rank 142</name>
<description><![CDATA[  <table width="500">
<tr><td>Country: <b>RUS</b></td><td>Flare ID: <b>vnfdb_2012_10356</b></td></tr>
<tr><td colspan="2">Combustion parameters:</td></tr>
<tr><td>Lat=60.738499, Lon=69.911050 deg.</td><td>Tavg=1762.8 K, RHsum=6.05412 MW</td></tr>
<tr><td>Freq. detect.=91.59 %</td><td>Area=30.08 m2</td></tr>
<tr><td>BCM=0.166</td><td>Type: upstream</td></tr>
</table>]]></description><Point>
<coordinates>69.911050,60.738499,0</coordinates>
</Point>
</Placemark>
<Placemark>
<Style id="highlightPlacemark143">
<IconStyle>
<scale>0.75</scale>
<Icon>
<href>http://maps.google.com/mapfiles/ms/micons/red.png</href>
</Icon>
</IconStyle>
<LabelStyle>
<scale>0</scale>
</LabelStyle>
</Style>
<name>Rank 143</name>
<description><![CDATA[  <table width="500">
<tr><td>Country: <b>MEX</b></td><td>Flare ID: <b>vnfdb_2012_05635</b></td></tr>
<tr><td colspan="2">Combustion parameters:</td></tr>
<tr><td>Lat=18.644808, Lon=-92.172569 deg.</td><td>Tavg=1585.66 K, RHsum=6.05029 MW</td></tr>
<tr><td>Freq. detect.=98.89 %</td><td>Area=66.57 m2</td></tr>
<tr><td>BCM=0.166</td><td>Type: upstream</td></tr>
</table>]]></description><Point>
<coordinates>-92.172569,18.644808,0</coordinates>
</Point>
</Placemark>
<Placemark>
<Style id="highlightPlacemark144">
<IconStyle>
<scale>0.75</scale>
<Icon>
<href>http://maps.google.com/mapfiles/ms/micons/red.png</href>
</Icon>
</IconStyle>
<LabelStyle>
<scale>0</scale>
</LabelStyle>
</Style>
<name>Rank 144</name>
<description><![CDATA[  <table width="500">
<tr><td>Country: <b>RUS</b></td><td>Flare ID: <b>vnfdb_2012_10770</b></td></tr>
<tr><td colspan="2">Combustion parameters:</td></tr>
<tr><td>Lat=61.265375, Lon=77.011739 deg.</td><td>Tavg=1796 K, RHsum=6.04536 MW</td></tr>
<tr><td>Freq. detect.=55.87 %</td><td>Area=52.29 m2</td></tr>
<tr><td>BCM=0.166</td><td>Type: upstream</td></tr>
</table>]]></description><Point>
<coordinates>77.011739,61.265375,0</coordinates>
</Point>
</Placemark>
<Placemark>
<Style id="highlightPlacemark145">
<IconStyle>
<scale>0.75</scale>
<Icon>
<href>http://maps.google.com/mapfiles/ms/micons/red.png</href>
</Icon>
</IconStyle>
<LabelStyle>
<scale>0</scale>
</LabelStyle>
</Style>
<name>Rank 145</name>
<description><![CDATA[  <table width="500">
<tr><td>Country: <b>VEN</b></td><td>Flare ID: <b>vnfdb_2012_05987</b></td></tr>
<tr><td colspan="2">Combustion parameters:</td></tr>
<tr><td>Lat=9.651231, Lon=-63.536004 deg.</td><td>Tavg=1773.23 K, RHsum=6.00352 MW</td></tr>
<tr><td>Freq. detect.=97.33 %</td><td>Area=25.35 m2</td></tr>
<tr><td>BCM=0.164</td><td>Type: upstream</td></tr>
</table>]]></description><Point>
<coordinates>-63.536004,9.651231,0</coordinates>
</Point>
</Placemark>
<Placemark>
<Style id="highlightPlacemark146">
<IconStyle>
<scale>0.75</scale>
<Icon>
<href>http://maps.google.com/mapfiles/ms/micons/red.png</href>
</Icon>
</IconStyle>
<LabelStyle>
<scale>0</scale>
</LabelStyle>
</Style>
<name>Rank 146</name>
<description><![CDATA[  <table width="500">
<tr><td>Country: <b>IRN</b></td><td>Flare ID: <b>vnfdb_2012_08675</b></td></tr>
<tr><td colspan="2">Combustion parameters:</td></tr>
<tr><td>Lat=32.503821, Lon=47.206443 deg.</td><td>Tavg=1765.49 K, RHsum=5.99148 MW</td></tr>
<tr><td>Freq. detect.=88.08 %</td><td>Area=30.96 m2</td></tr>
<tr><td>BCM=0.164</td><td>Type: upstream</td></tr>
</table>]]></description><Point>
<coordinates>47.206443,32.503821,0</coordinates>
</Point>
</Placemark>
<Placemark>
<Style id="highlightPlacemark147">
<IconStyle>
<scale>0.75</scale>
<Icon>
<href>http://maps.google.com/mapfiles/ms/micons/red.png</href>
</Icon>
</IconStyle>
<LabelStyle>
<scale>0</scale>
</LabelStyle>
</Style>
<name>Rank 147</name>
<description><![CDATA[  <table width="500">
<tr><td>Country: <b>IRQ</b></td><td>Flare ID: <b>vnfdb_2012_08629</b></td></tr>
<tr><td colspan="2">Combustion parameters:</td></tr>
<tr><td>Lat=34.041576, Lon=45.444651 deg.</td><td>Tavg=1788.98 K, RHsum=5.97073 MW</td></tr>
<tr><td>Freq. detect.=96.54 %</td><td>Area=23.19 m2</td></tr>
<tr><td>BCM=0.164</td><td>Type: upstream</td></tr>
</table>]]></description><Point>
<coordinates>45.444651,34.041576,0</coordinates>
</Point>
</Placemark>
<Placemark>
<Style id="highlightPlacemark148">
<IconStyle>
<scale>0.75</scale>
<Icon>
<href>http://maps.google.com/mapfiles/ms/micons/red.png</href>
</Icon>
</IconStyle>
<LabelStyle>
<scale>0</scale>
</LabelStyle>
</Style>
<name>Rank 148</name>
<description><![CDATA[  <table width="500">
<tr><td>Country: <b>THA</b></td><td>Flare ID: <b>vnfdb_2012_11883</b></td></tr>
<tr><td colspan="2">Combustion parameters:</td></tr>
<tr><td>Lat=8.030736, Lon=102.314416 deg.</td><td>Tavg=1580.32 K, RHsum=5.94838 MW</td></tr>
<tr><td>Freq. detect.=96.09 %</td><td>Area=51.80 m2</td></tr>
<tr><td>BCM=0.163</td><td>Type: upstream</td></tr>
</table>]]></description><Point>
<coordinates>102.314416,8.030736,0</coordinates>
</Point>
</Placemark>
<Placemark>
<Style id="highlightPlacemark149">
<IconStyle>
<scale>0.75</scale>
<Icon>
<href>http://maps.google.com/mapfiles/ms/micons/red.png</href>
</Icon>
</IconStyle>
<LabelStyle>
<scale>0</scale>
</LabelStyle>
</Style>
<name>Rank 149</name>
<description><![CDATA[  <table width="500">
<tr><td>Country: <b>MEX</b></td><td>Flare ID: <b>vnfdb_2012_05631</b></td></tr>
<tr><td colspan="2">Combustion parameters:</td></tr>
<tr><td>Lat=19.302013, Lon=-92.198840 deg.</td><td>Tavg=1681.77 K, RHsum=5.94403 MW</td></tr>
<tr><td>Freq. detect.=90.88 %</td><td>Area=46.28 m2</td></tr>
<tr><td>BCM=0.163</td><td>Type: upstream</td></tr>
</table>]]></description><Point>
<coordinates>-92.198840,19.302013,0</coordinates>
</Point>
</Placemark>
<Placemark>
<Style id="highlightPlacemark150">
<IconStyle>
<scale>0.75</scale>
<Icon>
<href>http://maps.google.com/mapfiles/ms/micons/red.png</href>
</Icon>
</IconStyle>
<LabelStyle>
<scale>0</scale>
</LabelStyle>
</Style>
<name>Rank 150</name>
<description><![CDATA[  <table width="500">
<tr><td>Country: <b>LBY</b></td><td>Flare ID: <b>vnfdb_2012_08131</b></td></tr>
<tr><td colspan="2">Combustion parameters:</td></tr>
<tr><td>Lat=33.860795, Lon=12.057062 deg.</td><td>Tavg=1763.21 K, RHsum=5.92548 MW</td></tr>
<tr><td>Freq. detect.=95.71 %</td><td>Area=24.69 m2</td></tr>
<tr><td>BCM=0.162</td><td>Type: upstream</td></tr>
</table>]]></description><Point>
<coordinates>12.057062,33.860795,0</coordinates>
</Point>
</Placemark>
<Placemark>
<Style id="highlightPlacemark151">
<IconStyle>
<scale>0.75</scale>
<Icon>
<href>http://maps.google.com/mapfiles/ms/micons/red.png</href>
</Icon>
</IconStyle>
<LabelStyle>
<scale>0</scale>
</LabelStyle>
</Style>
<name>Rank 151</name>
<description><![CDATA[  <table width="500">
<tr><td>Country: <b>LBY</b></td><td>Flare ID: <b>vnfdb_2012_08193</b></td></tr>
<tr><td colspan="2">Combustion parameters:</td></tr>
<tr><td>Lat=29.231546, Lon=19.696094 deg.</td><td>Tavg=1493.03 K, RHsum=5.89855 MW</td></tr>
<tr><td>Freq. detect.=83.64 %</td><td>Area=85.16 m2</td></tr>
<tr><td>BCM=0.162</td><td>Type: upstream</td></tr>
</table>]]></description><Point>
<coordinates>19.696094,29.231546,0</coordinates>
</Point>
</Placemark>
<Placemark>
<Style id="highlightPlacemark152">
<IconStyle>
<scale>0.75</scale>
<Icon>
<href>http://maps.google.com/mapfiles/ms/micons/red.png</href>
</Icon>
</IconStyle>
<LabelStyle>
<scale>0</scale>
</LabelStyle>
</Style>
<name>Rank 152</name>
<description><![CDATA[  <table width="500">
<tr><td>Country: <b>EGY</b></td><td>Flare ID: <b>vnfdb_2012_08268</b></td></tr>
<tr><td colspan="2">Combustion parameters:</td></tr>
<tr><td>Lat=30.532882, Lon=26.086825 deg.</td><td>Tavg=1589.54 K, RHsum=5.89653 MW</td></tr>
<tr><td>Freq. detect.=98.58 %</td><td>Area=45.43 m2</td></tr>
<tr><td>BCM=0.162</td><td>Type: upstream</td></tr>
</table>]]></description><Point>
<coordinates>26.086825,30.532882,0</coordinates>
</Point>
</Placemark>
<Placemark>
<Style id="highlightPlacemark153">
<IconStyle>
<scale>0.75</scale>
<Icon>
<href>http://maps.google.com/mapfiles/ms/micons/red.png</href>
</Icon>
</IconStyle>
<LabelStyle>
<scale>0</scale>
</LabelStyle>
</Style>
<name>Rank 153</name>
<description><![CDATA[  <table width="500">
<tr><td>Country: <b>IRN</b></td><td>Flare ID: <b>vnfdb_2012_09005</b></td></tr>
<tr><td colspan="2">Combustion parameters:</td></tr>
<tr><td>Lat=31.042430, Lon=49.391329 deg.</td><td>Tavg=1672.59 K, RHsum=5.85701 MW</td></tr>
<tr><td>Freq. detect.=93.31 %</td><td>Area=40.57 m2</td></tr>
<tr><td>BCM=0.16</td><td>Type: upstream</td></tr>
</table>]]></description><Point>
<coordinates>49.391329,31.042430,0</coordinates>
</Point>
</Placemark>
<Placemark>
<Style id="highlightPlacemark154">
<IconStyle>
<scale>0.75</scale>
<Icon>
<href>http://maps.google.com/mapfiles/ms/micons/red.png</href>
</Icon>
</IconStyle>
<LabelStyle>
<scale>0</scale>
</LabelStyle>
</Style>
<name>Rank 154</name>
<description><![CDATA[  <table width="500">
<tr><td>Country: <b>NGA</b></td><td>Flare ID: <b>vnfdb_2012_07730</b></td></tr>
<tr><td colspan="2">Combustion parameters:</td></tr>
<tr><td>Lat=5.387437, Lon=4.589571 deg.</td><td>Tavg=1722.61 K, RHsum=5.80525 MW</td></tr>
<tr><td>Freq. detect.=94.79 %</td><td>Area=26.89 m2</td></tr>
<tr><td>BCM=0.159</td><td>Type: upstream</td></tr>
</table>]]></description><Point>
<coordinates>4.589571,5.387437,0</coordinates>
</Point>
</Placemark>
<Placemark>
<Style id="highlightPlacemark155">
<IconStyle>
<scale>0.75</scale>
<Icon>
<href>http://maps.google.com/mapfiles/ms/micons/red.png</href>
</Icon>
</IconStyle>
<LabelStyle>
<scale>0</scale>
</LabelStyle>
</Style>
<name>Rank 155</name>
<description><![CDATA[  <table width="500">
<tr><td>Country: <b>LBY</b></td><td>Flare ID: <b>vnfdb_2012_08238</b></td></tr>
<tr><td colspan="2">Combustion parameters:</td></tr>
<tr><td>Lat=28.834733, Lon=22.122226 deg.</td><td>Tavg=1613.97 K, RHsum=5.80349 MW</td></tr>
<tr><td>Freq. detect.=98.02 %</td><td>Area=44.00 m2</td></tr>
<tr><td>BCM=0.159</td><td>Type: upstream</td></tr>
</table>]]></description><Point>
<coordinates>22.122226,28.834733,0</coordinates>
</Point>
</Placemark>
<Placemark>
<Style id="highlightPlacemark156">
<IconStyle>
<scale>0.75</scale>
<Icon>
<href>http://maps.google.com/mapfiles/ms/micons/red.png</href>
</Icon>
</IconStyle>
<LabelStyle>
<scale>0</scale>
</LabelStyle>
</Style>
<name>Rank 156</name>
<description><![CDATA[  <table width="500">
<tr><td>Country: <b>NGA</b></td><td>Flare ID: <b>vnfdb_2012_07829</b></td></tr>
<tr><td colspan="2">Combustion parameters:</td></tr>
<tr><td>Lat=5.900817, Lon=5.581895 deg.</td><td>Tavg=1728.42 K, RHsum=5.76136 MW</td></tr>
<tr><td>Freq. detect.=84.83 %</td><td>Area=30.17 m2</td></tr>
<tr><td>BCM=0.158</td><td>Type: upstream</td></tr>
</table>]]></description><Point>
<coordinates>5.581895,5.900817,0</coordinates>
</Point>
</Placemark>
<Placemark>
<Style id="highlightPlacemark157">
<IconStyle>
<scale>0.75</scale>
<Icon>
<href>http://maps.google.com/mapfiles/ms/micons/red.png</href>
</Icon>
</IconStyle>
<LabelStyle>
<scale>0</scale>
</LabelStyle>
</Style>
<name>Rank 157</name>
<description><![CDATA[  <table width="500">
<tr><td>Country: <b>AGO</b></td><td>Flare ID: <b>vnfdb_2012_09882</b></td></tr>
<tr><td colspan="2">Combustion parameters:</td></tr>
<tr><td>Lat=-7.846134, Lon=12.111510 deg.</td><td>Tavg=1752 K, RHsum=5.75322 MW</td></tr>
<tr><td>Freq. detect.=57.90 %</td><td>Area=38.15 m2</td></tr>
<tr><td>BCM=0.158</td><td>Type: upstream</td></tr>
</table>]]></description><Point>
<coordinates>12.111510,-7.846134,0</coordinates>
</Point>
</Placemark>
<Placemark>
<Style id="highlightPlacemark158">
<IconStyle>
<scale>0.75</scale>
<Icon>
<href>http://maps.google.com/mapfiles/ms/micons/red.png</href>
</Icon>
</IconStyle>
<LabelStyle>
<scale>0</scale>
</LabelStyle>
</Style>
<name>Rank 158</name>
<description><![CDATA[  <table width="500">
<tr><td>Country: <b>IRN</b></td><td>Flare ID: <b>vnfdb_2012_08762</b></td></tr>
<tr><td colspan="2">Combustion parameters:</td></tr>
<tr><td>Lat=31.354661, Lon=47.855822 deg.</td><td>Tavg=1733.15 K, RHsum=5.71072 MW</td></tr>
<tr><td>Freq. detect.=95.54 %</td><td>Area=24.94 m2</td></tr>
<tr><td>BCM=0.156</td><td>Type: upstream</td></tr>
</table>]]></description><Point>
<coordinates>47.855822,31.354661,0</coordinates>
</Point>
</Placemark>
<Placemark>
<Style id="highlightPlacemark159">
<IconStyle>
<scale>0.75</scale>
<Icon>
<href>http://maps.google.com/mapfiles/ms/micons/red.png</href>
</Icon>
</IconStyle>
<LabelStyle>
<scale>0</scale>
</LabelStyle>
</Style>
<name>Rank 159</name>
<description><![CDATA[  <table width="500">
<tr><td>Country: <b>DZA</b></td><td>Flare ID: <b>vnfdb_2012_07894</b></td></tr>
<tr><td colspan="2">Combustion parameters:</td></tr>
<tr><td>Lat=31.756089, Lon=6.143454 deg.</td><td>Tavg=1516.06 K, RHsum=5.67818 MW</td></tr>
<tr><td>Freq. detect.=97.50 %</td><td>Area=61.36 m2</td></tr>
<tr><td>BCM=0.156</td><td>Type: upstream</td></tr>
</table>]]></description><Point>
<coordinates>6.143454,31.756089,0</coordinates>
</Point>
</Placemark>
<Placemark>
<Style id="highlightPlacemark160">
<IconStyle>
<scale>0.75</scale>
<Icon>
<href>http://maps.google.com/mapfiles/ms/micons/red.png</href>
</Icon>
</IconStyle>
<LabelStyle>
<scale>0</scale>
</LabelStyle>
</Style>
<name>Rank 160</name>
<description><![CDATA[  <table width="500">
<tr><td>Country: <b>VEN</b></td><td>Flare ID: <b>vnfdb_2012_06017</b></td></tr>
<tr><td colspan="2">Combustion parameters:</td></tr>
<tr><td>Lat=10.084963, Lon=-62.263143 deg.</td><td>Tavg=1745.06 K, RHsum=5.65746 MW</td></tr>
<tr><td>Freq. detect.=95.24 %</td><td>Area=27.18 m2</td></tr>
<tr><td>BCM=0.155</td><td>Type: upstream</td></tr>
</table>]]></description><Point>
<coordinates>-62.263143,10.084963,0</coordinates>
</Point>
</Placemark>
<Placemark>
<Style id="highlightPlacemark161">
<IconStyle>
<scale>0.75</scale>
<Icon>
<href>http://maps.google.com/mapfiles/ms/micons/red.png</href>
</Icon>
</IconStyle>
<LabelStyle>
<scale>0</scale>
</LabelStyle>
</Style>
<name>Rank 161</name>
<description><![CDATA[  <table width="500">
<tr><td>Country: <b>KAZ</b></td><td>Flare ID: <b>vnfdb_2012_10218</b></td></tr>
<tr><td colspan="2">Combustion parameters:</td></tr>
<tr><td>Lat=46.427467, Lon=64.682061 deg.</td><td>Tavg=1770.33 K, RHsum=5.64368 MW</td></tr>
<tr><td>Freq. detect.=97.95 %</td><td>Area=25.61 m2</td></tr>
<tr><td>BCM=0.155</td><td>Type: upstream</td></tr>
</table>]]></description><Point>
<coordinates>64.682061,46.427467,0</coordinates>
</Point>
</Placemark>
<Placemark>
<Style id="highlightPlacemark162">
<IconStyle>
<scale>0.75</scale>
<Icon>
<href>http://maps.google.com/mapfiles/ms/micons/red.png</href>
</Icon>
</IconStyle>
<LabelStyle>
<scale>0</scale>
</LabelStyle>
</Style>
<name>Rank 162</name>
<description><![CDATA[  <table width="500">
<tr><td>Country: <b>IRQ</b></td><td>Flare ID: <b>vnfdb_2012_08726</b></td></tr>
<tr><td colspan="2">Combustion parameters:</td></tr>
<tr><td>Lat=30.488242, Lon=47.608477 deg.</td><td>Tavg=1680.71 K, RHsum=5.63407 MW</td></tr>
<tr><td>Freq. detect.=95.37 %</td><td>Area=35.52 m2</td></tr>
<tr><td>BCM=0.154</td><td>Type: upstream</td></tr>
</table>]]></description><Point>
<coordinates>47.608477,30.488242,0</coordinates>
</Point>
</Placemark>
<Placemark>
<Style id="highlightPlacemark163">
<IconStyle>
<scale>0.75</scale>
<Icon>
<href>http://maps.google.com/mapfiles/ms/micons/red.png</href>
</Icon>
</IconStyle>
<LabelStyle>
<scale>0</scale>
</LabelStyle>
</Style>
<name>Rank 163</name>
<description><![CDATA[  <table width="500">
<tr><td>Country: <b>RUS</b></td><td>Flare ID: <b>vnfdb_2012_10919</b></td></tr>
<tr><td colspan="2">Combustion parameters:</td></tr>
<tr><td>Lat=58.154843, Lon=78.883236 deg.</td><td>Tavg=1755.15 K, RHsum=5.5483 MW</td></tr>
<tr><td>Freq. detect.=85.37 %</td><td>Area=36.03 m2</td></tr>
<tr><td>BCM=0.152</td><td>Type: upstream</td></tr>
</table>]]></description><Point>
<coordinates>78.883236,58.154843,0</coordinates>
</Point>
</Placemark>
<Placemark>
<Style id="highlightPlacemark164">
<IconStyle>
<scale>0.75</scale>
<Icon>
<href>http://maps.google.com/mapfiles/ms/micons/red.png</href>
</Icon>
</IconStyle>
<LabelStyle>
<scale>0</scale>
</LabelStyle>
</Style>
<name>Rank 164</name>
<description><![CDATA[  <table width="500">
<tr><td>Country: <b>IRQ</b></td><td>Flare ID: <b>vnfdb_2012_08605</b></td></tr>
<tr><td colspan="2">Combustion parameters:</td></tr>
<tr><td>Lat=33.489240, Lon=44.344345 deg.</td><td>Tavg=1726.08 K, RHsum=5.53274 MW</td></tr>
<tr><td>Freq. detect.=95.31 %</td><td>Area=23.73 m2</td></tr>
<tr><td>BCM=0.152</td><td>Type: upstream</td></tr>
</table>]]></description><Point>
<coordinates>44.344345,33.489240,0</coordinates>
</Point>
</Placemark>
<Placemark>
<Style id="highlightPlacemark165">
<IconStyle>
<scale>0.75</scale>
<Icon>
<href>http://maps.google.com/mapfiles/ms/micons/red.png</href>
</Icon>
</IconStyle>
<LabelStyle>
<scale>0</scale>
</LabelStyle>
</Style>
<name>Rank 165</name>
<description><![CDATA[  <table width="500">
<tr><td>Country: <b>IRN</b></td><td>Flare ID: <b>vnfdb_2012_09154</b></td></tr>
<tr><td colspan="2">Combustion parameters:</td></tr>
<tr><td>Lat=30.039113, Lon=50.635553 deg.</td><td>Tavg=1686.62 K, RHsum=5.48929 MW</td></tr>
<tr><td>Freq. detect.=91.91 %</td><td>Area=36.23 m2</td></tr>
<tr><td>BCM=0.15</td><td>Type: upstream</td></tr>
</table>]]></description><Point>
<coordinates>50.635553,30.039113,0</coordinates>
</Point>
</Placemark>
<Placemark>
<Style id="highlightPlacemark166">
<IconStyle>
<scale>0.75</scale>
<Icon>
<href>http://maps.google.com/mapfiles/ms/micons/red.png</href>
</Icon>
</IconStyle>
<LabelStyle>
<scale>0</scale>
</LabelStyle>
</Style>
<name>Rank 166</name>
<description><![CDATA[  <table width="500">
<tr><td>Country: <b>AGO</b></td><td>Flare ID: <b>vnfdb_2012_09899</b></td></tr>
<tr><td colspan="2">Combustion parameters:</td></tr>
<tr><td>Lat=-7.157496, Lon=12.341001 deg.</td><td>Tavg=1662.58 K, RHsum=5.47999 MW</td></tr>
<tr><td>Freq. detect.=92.75 %</td><td>Area=32.01 m2</td></tr>
<tr><td>BCM=0.15</td><td>Type: upstream</td></tr>
</table>]]></description><Point>
<coordinates>12.341001,-7.157496,0</coordinates>
</Point>
</Placemark>
<Placemark>
<Style id="highlightPlacemark167">
<IconStyle>
<scale>0.75</scale>
<Icon>
<href>http://maps.google.com/mapfiles/ms/micons/red.png</href>
</Icon>
</IconStyle>
<LabelStyle>
<scale>0</scale>
</LabelStyle>
</Style>
<name>Rank 167</name>
<description><![CDATA[  <table width="500">
<tr><td>Country: <b>YEM</b></td><td>Flare ID: <b>vnfdb_2012_08855</b></td></tr>
<tr><td colspan="2">Combustion parameters:</td></tr>
<tr><td>Lat=15.718211, Lon=48.815539 deg.</td><td>Tavg=1751.09 K, RHsum=5.47469 MW</td></tr>
<tr><td>Freq. detect.=96.60 %</td><td>Area=24.92 m2</td></tr>
<tr><td>BCM=0.15</td><td>Type: upstream</td></tr>
</table>]]></description><Point>
<coordinates>48.815539,15.718211,0</coordinates>
</Point>
</Placemark>
<Placemark>
<Style id="highlightPlacemark168">
<IconStyle>
<scale>0.75</scale>
<Icon>
<href>http://maps.google.com/mapfiles/ms/micons/red.png</href>
</Icon>
</IconStyle>
<LabelStyle>
<scale>0</scale>
</LabelStyle>
</Style>
<name>Rank 168</name>
<description><![CDATA[  <table width="500">
<tr><td>Country: <b>KWT</b></td><td>Flare ID: <b>vnfdb_2012_08723</b></td></tr>
<tr><td colspan="2">Combustion parameters:</td></tr>
<tr><td>Lat=29.021491, Lon=47.588221 deg.</td><td>Tavg=1730.49 K, RHsum=5.47257 MW</td></tr>
<tr><td>Freq. detect.=95.64 %</td><td>Area=30.84 m2</td></tr>
<tr><td>BCM=0.15</td><td>Type: upstream</td></tr>
</table>]]></description><Point>
<coordinates>47.588221,29.021491,0</coordinates>
</Point>
</Placemark>
<Placemark>
<Style id="highlightPlacemark169">
<IconStyle>
<scale>0.75</scale>
<Icon>
<href>http://maps.google.com/mapfiles/ms/micons/red.png</href>
</Icon>
</IconStyle>
<LabelStyle>
<scale>0</scale>
</LabelStyle>
</Style>
<name>Rank 169</name>
<description><![CDATA[  <table width="500">
<tr><td>Country: <b>DZA</b></td><td>Flare ID: <b>vnfdb_2012_08073</b></td></tr>
<tr><td colspan="2">Combustion parameters:</td></tr>
<tr><td>Lat=28.080751, Lon=9.786681 deg.</td><td>Tavg=1582.3 K, RHsum=5.46766 MW</td></tr>
<tr><td>Freq. detect.=96.70 %</td><td>Area=45.50 m2</td></tr>
<tr><td>BCM=0.15</td><td>Type: upstream</td></tr>
</table>]]></description><Point>
<coordinates>9.786681,28.080751,0</coordinates>
</Point>
</Placemark>
<Placemark>
<Style id="highlightPlacemark170">
<IconStyle>
<scale>0.75</scale>
<Icon>
<href>http://maps.google.com/mapfiles/ms/micons/red.png</href>
</Icon>
</IconStyle>
<LabelStyle>
<scale>0</scale>
</LabelStyle>
</Style>
<name>Rank 170</name>
<description><![CDATA[  <table width="500">
<tr><td>Country: <b>RUS</b></td><td>Flare ID: <b>vnfdb_2012_10752</b></td></tr>
<tr><td colspan="2">Combustion parameters:</td></tr>
<tr><td>Lat=63.094446, Lon=76.927278 deg.</td><td>Tavg=1758.8 K, RHsum=5.42737 MW</td></tr>
<tr><td>Freq. detect.=82.89 %</td><td>Area=27.87 m2</td></tr>
<tr><td>BCM=0.149</td><td>Type: upstream</td></tr>
</table>]]></description><Point>
<coordinates>76.927278,63.094446,0</coordinates>
</Point>
</Placemark>
<Placemark>
<Style id="highlightPlacemark171">
<IconStyle>
<scale>0.75</scale>
<Icon>
<href>http://maps.google.com/mapfiles/ms/micons/red.png</href>
</Icon>
</IconStyle>
<LabelStyle>
<scale>0</scale>
</LabelStyle>
</Style>
<name>Rank 171</name>
<description><![CDATA[  <table width="500">
<tr><td>Country: <b>BRA</b></td><td>Flare ID: <b>vnfdb_2012_06553</b></td></tr>
<tr><td colspan="2">Combustion parameters:</td></tr>
<tr><td>Lat=-25.229823, Lon=-42.892743 deg.</td><td>Tavg=1713.6 K, RHsum=5.39978 MW</td></tr>
<tr><td>Freq. detect.=68.17 %</td><td>Area=30.25 m2</td></tr>
<tr><td>BCM=0.148</td><td>Type: upstream</td></tr>
</table>]]></description><Point>
<coordinates>-42.892743,-25.229823,0</coordinates>
</Point>
</Placemark>
<Placemark>
<Style id="highlightPlacemark172">
<IconStyle>
<scale>0.75</scale>
<Icon>
<href>http://maps.google.com/mapfiles/ms/micons/red.png</href>
</Icon>
</IconStyle>
<LabelStyle>
<scale>0</scale>
</LabelStyle>
</Style>
<name>Rank 172</name>
<description><![CDATA[  <table width="500">
<tr><td>Country: <b>RUS</b></td><td>Flare ID: <b>vnfdb_2012_10966</b></td></tr>
<tr><td colspan="2">Combustion parameters:</td></tr>
<tr><td>Lat=64.185445, Lon=79.617244 deg.</td><td>Tavg=1731.75 K, RHsum=5.38262 MW</td></tr>
<tr><td>Freq. detect.=84.34 %</td><td>Area=31.46 m2</td></tr>
<tr><td>BCM=0.147</td><td>Type: upstream</td></tr>
</table>]]></description><Point>
<coordinates>79.617244,64.185445,0</coordinates>
</Point>
</Placemark>
<Placemark>
<Style id="highlightPlacemark173">
<IconStyle>
<scale>0.75</scale>
<Icon>
<href>http://maps.google.com/mapfiles/ms/micons/red.png</href>
</Icon>
</IconStyle>
<LabelStyle>
<scale>0</scale>
</LabelStyle>
</Style>
<name>Rank 173</name>
<description><![CDATA[  <table width="500">
<tr><td>Country: <b>IRN</b></td><td>Flare ID: <b>vnfdb_2012_08870</b></td></tr>
<tr><td colspan="2">Combustion parameters:</td></tr>
<tr><td>Lat=31.211885, Lon=48.953076 deg.</td><td>Tavg=1664.29 K, RHsum=5.35524 MW</td></tr>
<tr><td>Freq. detect.=95.68 %</td><td>Area=33.98 m2</td></tr>
<tr><td>BCM=0.147</td><td>Type: upstream</td></tr>
</table>]]></description><Point>
<coordinates>48.953076,31.211885,0</coordinates>
</Point>
</Placemark>
<Placemark>
<Style id="highlightPlacemark174">
<IconStyle>
<scale>0.75</scale>
<Icon>
<href>http://maps.google.com/mapfiles/ms/micons/red.png</href>
</Icon>
</IconStyle>
<LabelStyle>
<scale>0</scale>
</LabelStyle>
</Style>
<name>Rank 174</name>
<description><![CDATA[  <table width="500">
<tr><td>Country: <b>IDN</b></td><td>Flare ID: <b>vnfdb_2012_12645</b></td></tr>
<tr><td colspan="2">Combustion parameters:</td></tr>
<tr><td>Lat=-7.106579, Lon=111.968460 deg.</td><td>Tavg=1731.68 K, RHsum=5.33758 MW</td></tr>
<tr><td>Freq. detect.=89.33 %</td><td>Area=28.19 m2</td></tr>
<tr><td>BCM=0.146</td><td>Type: upstream</td></tr>
</table>]]></description><Point>
<coordinates>111.968460,-7.106579,0</coordinates>
</Point>
</Placemark>
<Placemark>
<Style id="highlightPlacemark175">
<IconStyle>
<scale>0.75</scale>
<Icon>
<href>http://maps.google.com/mapfiles/ms/micons/red.png</href>
</Icon>
</IconStyle>
<LabelStyle>
<scale>0</scale>
</LabelStyle>
</Style>
<name>Rank 175</name>
<description><![CDATA[  <table width="500">
<tr><td>Country: <b>RUS</b></td><td>Flare ID: <b>vnfdb_2012_10841</b></td></tr>
<tr><td colspan="2">Combustion parameters:</td></tr>
<tr><td>Lat=63.918921, Lon=77.652329 deg.</td><td>Tavg=1806.59 K, RHsum=5.33247 MW</td></tr>
<tr><td>Freq. detect.=75.41 %</td><td>Area=23.77 m2</td></tr>
<tr><td>BCM=0.146</td><td>Type: upstream</td></tr>
</table>]]></description><Point>
<coordinates>77.652329,63.918921,0</coordinates>
</Point>
</Placemark>
<Placemark>
<Style id="highlightPlacemark176">
<IconStyle>
<scale>0.75</scale>
<Icon>
<href>http://maps.google.com/mapfiles/ms/micons/red.png</href>
</Icon>
</IconStyle>
<LabelStyle>
<scale>0</scale>
</LabelStyle>
</Style>
<name>Rank 176</name>
<description><![CDATA[  <table width="500">
<tr><td>Country: <b>RUS</b></td><td>Flare ID: <b>vnfdb_2012_10840</b></td></tr>
<tr><td colspan="2">Combustion parameters:</td></tr>
<tr><td>Lat=63.919787, Lon=77.634065 deg.</td><td>Tavg=1730.44 K, RHsum=5.28961 MW</td></tr>
<tr><td>Freq. detect.=84.45 %</td><td>Area=26.51 m2</td></tr>
<tr><td>BCM=0.145</td><td>Type: upstream</td></tr>
</table>]]></description><Point>
<coordinates>77.634065,63.919787,0</coordinates>
</Point>
</Placemark>
<Placemark>
<Style id="highlightPlacemark177">
<IconStyle>
<scale>0.75</scale>
<Icon>
<href>http://maps.google.com/mapfiles/ms/micons/red.png</href>
</Icon>
</IconStyle>
<LabelStyle>
<scale>0</scale>
</LabelStyle>
</Style>
<name>Rank 177</name>
<description><![CDATA[  <table width="500">
<tr><td>Country: <b>AGO</b></td><td>Flare ID: <b>vnfdb_2012_09852</b></td></tr>
<tr><td colspan="2">Combustion parameters:</td></tr>
<tr><td>Lat=-5.368791, Lon=11.664277 deg.</td><td>Tavg=1685.93 K, RHsum=5.27486 MW</td></tr>
<tr><td>Freq. detect.=97.28 %</td><td>Area=28.37 m2</td></tr>
<tr><td>BCM=0.145</td><td>Type: upstream</td></tr>
</table>]]></description><Point>
<coordinates>11.664277,-5.368791,0</coordinates>
</Point>
</Placemark>
<Placemark>
<Style id="highlightPlacemark178">
<IconStyle>
<scale>0.75</scale>
<Icon>
<href>http://maps.google.com/mapfiles/ms/micons/red.png</href>
</Icon>
</IconStyle>
<LabelStyle>
<scale>0</scale>
</LabelStyle>
</Style>
<name>Rank 178</name>
<description><![CDATA[  <table width="500">
<tr><td>Country: <b>LBY</b></td><td>Flare ID: <b>vnfdb_2012_08163</b></td></tr>
<tr><td colspan="2">Combustion parameters:</td></tr>
<tr><td>Lat=29.055572, Lon=17.461202 deg.</td><td>Tavg=1707.86 K, RHsum=5.25472 MW</td></tr>
<tr><td>Freq. detect.=96.35 %</td><td>Area=27.35 m2</td></tr>
<tr><td>BCM=0.144</td><td>Type: upstream</td></tr>
</table>]]></description><Point>
<coordinates>17.461202,29.055572,0</coordinates>
</Point>
</Placemark>
<Placemark>
<Style id="highlightPlacemark179">
<IconStyle>
<scale>0.75</scale>
<Icon>
<href>http://maps.google.com/mapfiles/ms/micons/red.png</href>
</Icon>
</IconStyle>
<LabelStyle>
<scale>0</scale>
</LabelStyle>
</Style>
<name>Rank 179</name>
<description><![CDATA[  <table width="500">
<tr><td>Country: <b>LBY</b></td><td>Flare ID: <b>vnfdb_2012_08246</b></td></tr>
<tr><td colspan="2">Combustion parameters:</td></tr>
<tr><td>Lat=27.812360, Lon=22.431109 deg.</td><td>Tavg=1633.09 K, RHsum=5.19907 MW</td></tr>
<tr><td>Freq. detect.=92.08 %</td><td>Area=32.31 m2</td></tr>
<tr><td>BCM=0.142</td><td>Type: upstream</td></tr>
</table>]]></description><Point>
<coordinates>22.431109,27.812360,0</coordinates>
</Point>
</Placemark>
<Placemark>
<Style id="highlightPlacemark180">
<IconStyle>
<scale>0.75</scale>
<Icon>
<href>http://maps.google.com/mapfiles/ms/micons/red.png</href>
</Icon>
</IconStyle>
<LabelStyle>
<scale>0</scale>
</LabelStyle>
</Style>
<name>Rank 180</name>
<description><![CDATA[  <table width="500">
<tr><td>Country: <b>LBY</b></td><td>Flare ID: <b>vnfdb_2012_08245</b></td></tr>
<tr><td colspan="2">Combustion parameters:</td></tr>
<tr><td>Lat=27.583146, Lon=22.402174 deg.</td><td>Tavg=1539.2 K, RHsum=5.19709 MW</td></tr>
<tr><td>Freq. detect.=88.49 %</td><td>Area=49.17 m2</td></tr>
<tr><td>BCM=0.142</td><td>Type: upstream</td></tr>
</table>]]></description><Point>
<coordinates>22.402174,27.583146,0</coordinates>
</Point>
</Placemark>
<Placemark>
<Style id="highlightPlacemark181">
<IconStyle>
<scale>0.75</scale>
<Icon>
<href>http://maps.google.com/mapfiles/kml/shapes/gas_stations.png</href>
</Icon>
</IconStyle>
<LabelStyle>
<scale>0</scale>
</LabelStyle>
</Style>
<name>Rank 181</name>
<description><![CDATA[  <table width="500">
<tr><td>Country: <b>IRQ</b></td><td>Flare ID: <b>vnfdb_2012_08557</b></td></tr>
<tr><td colspan="2">Combustion parameters:</td></tr>
<tr><td>Lat=35.002672, Lon=43.490452 deg.</td><td>Tavg=1707.1 K, RHsum=5.17918 MW</td></tr>
<tr><td>Freq. detect.=96.55 %</td><td>Area=27.76 m2</td></tr>
<tr><td>BCM=0.142</td><td>Type: downstream</td></tr>
</table>]]></description><Point>
<coordinates>43.490452,35.002672,0</coordinates>
</Point>
</Placemark>
<Placemark>
<Style id="highlightPlacemark182">
<IconStyle>
<scale>0.75</scale>
<Icon>
<href>http://maps.google.com/mapfiles/ms/micons/red.png</href>
</Icon>
</IconStyle>
<LabelStyle>
<scale>0</scale>
</LabelStyle>
</Style>
<name>Rank 182</name>
<description><![CDATA[  <table width="500">
<tr><td>Country: <b>IRN</b></td><td>Flare ID: <b>vnfdb_2012_08763</b></td></tr>
<tr><td colspan="2">Combustion parameters:</td></tr>
<tr><td>Lat=31.142792, Lon=47.871531 deg.</td><td>Tavg=1738.92 K, RHsum=5.15229 MW</td></tr>
<tr><td>Freq. detect.=92.08 %</td><td>Area=16.80 m2</td></tr>
<tr><td>BCM=0.141</td><td>Type: upstream</td></tr>
</table>]]></description><Point>
<coordinates>47.871531,31.142792,0</coordinates>
</Point>
</Placemark>
<Placemark>
<Style id="highlightPlacemark183">
<IconStyle>
<scale>0.75</scale>
<Icon>
<href>http://maps.google.com/mapfiles/ms/micons/red.png</href>
</Icon>
</IconStyle>
<LabelStyle>
<scale>0</scale>
</LabelStyle>
</Style>
<name>Rank 183</name>
<description><![CDATA[  <table width="500">
<tr><td>Country: <b>VEN</b></td><td>Flare ID: <b>vnfdb_2012_06003</b></td></tr>
<tr><td colspan="2">Combustion parameters:</td></tr>
<tr><td>Lat=9.014674, Lon=-63.205917 deg.</td><td>Tavg=1844.87 K, RHsum=5.15126 MW</td></tr>
<tr><td>Freq. detect.=97.33 %</td><td>Area=15.25 m2</td></tr>
<tr><td>BCM=0.141</td><td>Type: upstream</td></tr>
</table>]]></description><Point>
<coordinates>-63.205917,9.014674,0</coordinates>
</Point>
</Placemark>
<Placemark>
<Style id="highlightPlacemark184">
<IconStyle>
<scale>0.75</scale>
<Icon>
<href>http://maps.google.com/mapfiles/ms/micons/red.png</href>
</Icon>
</IconStyle>
<LabelStyle>
<scale>0</scale>
</LabelStyle>
</Style>
<name>Rank 184</name>
<description><![CDATA[  <table width="500">
<tr><td>Country: <b>NGA</b></td><td>Flare ID: <b>vnfdb_2012_07743</b></td></tr>
<tr><td colspan="2">Combustion parameters:</td></tr>
<tr><td>Lat=5.881897, Lon=4.834103 deg.</td><td>Tavg=1662.77 K, RHsum=5.14588 MW</td></tr>
<tr><td>Freq. detect.=95.76 %</td><td>Area=32.60 m2</td></tr>
<tr><td>BCM=0.141</td><td>Type: upstream</td></tr>
</table>]]></description><Point>
<coordinates>4.834103,5.881897,0</coordinates>
</Point>
</Placemark>
<Placemark>
<Style id="highlightPlacemark185">
<IconStyle>
<scale>0.75</scale>
<Icon>
<href>http://maps.google.com/mapfiles/kml/shapes/firedept.png</href>
</Icon>
</IconStyle>
<LabelStyle>
<scale>0</scale>
</LabelStyle>
</Style>
<name>Rank 185</name>
<description><![CDATA[  <table width="500">
<tr><td>Country: <b>DZA</b></td><td>Flare ID: <b>vnfdb_2012_06438</b></td></tr>
<tr><td colspan="2">Combustion parameters:</td></tr>
<tr><td>Lat=35.814818, Lon=-0.274014 deg.</td><td>Tavg=1639.4 K, RHsum=5.14338 MW</td></tr>
<tr><td>Freq. detect.=98.00 %</td><td>Area=35.00 m2</td></tr>
<tr><td>BCM=0.141</td><td>Type: LNG</td></tr>
</table>]]></description><Point>
<coordinates>-0.274014,35.814818,0</coordinates>
</Point>
</Placemark>
<Placemark>
<Style id="highlightPlacemark186">
<IconStyle>
<scale>0.75</scale>
<Icon>
<href>http://maps.google.com/mapfiles/ms/micons/red.png</href>
</Icon>
</IconStyle>
<LabelStyle>
<scale>0</scale>
</LabelStyle>
</Style>
<name>Rank 186</name>
<description><![CDATA[  <table width="500">
<tr><td>Country: <b>MEX</b></td><td>Flare ID: <b>vnfdb_2012_04984</b></td></tr>
<tr><td colspan="2">Combustion parameters:</td></tr>
<tr><td>Lat=20.517952, Lon=-97.478281 deg.</td><td>Tavg=1613.71 K, RHsum=5.09933 MW</td></tr>
<tr><td>Freq. detect.=95.64 %</td><td>Area=44.49 m2</td></tr>
<tr><td>BCM=0.14</td><td>Type: upstream</td></tr>
</table>]]></description><Point>
<coordinates>-97.478281,20.517952,0</coordinates>
</Point>
</Placemark>
<Placemark>
<Style id="highlightPlacemark187">
<IconStyle>
<scale>0.75</scale>
<Icon>
<href>http://maps.google.com/mapfiles/ms/micons/red.png</href>
</Icon>
</IconStyle>
<LabelStyle>
<scale>0</scale>
</LabelStyle>
</Style>
<name>Rank 187</name>
<description><![CDATA[  <table width="500">
<tr><td>Country: <b>LBY</b></td><td>Flare ID: <b>vnfdb_2012_08139</b></td></tr>
<tr><td colspan="2">Combustion parameters:</td></tr>
<tr><td>Lat=33.921491, Lon=12.677620 deg.</td><td>Tavg=1697.57 K, RHsum=5.09239 MW</td></tr>
<tr><td>Freq. detect.=95.97 %</td><td>Area=25.23 m2</td></tr>
<tr><td>BCM=0.14</td><td>Type: upstream</td></tr>
</table>]]></description><Point>
<coordinates>12.677620,33.921491,0</coordinates>
</Point>
</Placemark>
<Placemark>
<Style id="highlightPlacemark188">
<IconStyle>
<scale>0.75</scale>
<Icon>
<href>http://maps.google.com/mapfiles/ms/micons/red.png</href>
</Icon>
</IconStyle>
<LabelStyle>
<scale>0</scale>
</LabelStyle>
</Style>
<name>Rank 188</name>
<description><![CDATA[  <table width="500">
<tr><td>Country: <b>NGA</b></td><td>Flare ID: <b>vnfdb_2012_09551</b></td></tr>
<tr><td colspan="2">Combustion parameters:</td></tr>
<tr><td>Lat=4.628806, Lon=6.264010 deg.</td><td>Tavg=1667.86 K, RHsum=5.08004 MW</td></tr>
<tr><td>Freq. detect.=84.28 %</td><td>Area=32.14 m2</td></tr>
<tr><td>BCM=0.139</td><td>Type: upstream</td></tr>
</table>]]></description><Point>
<coordinates>6.264010,4.628806,0</coordinates>
</Point>
</Placemark>
<Placemark>
<Style id="highlightPlacemark189">
<IconStyle>
<scale>0.75</scale>
<Icon>
<href>http://maps.google.com/mapfiles/ms/micons/red.png</href>
</Icon>
</IconStyle>
<LabelStyle>
<scale>0</scale>
</LabelStyle>
</Style>
<name>Rank 189</name>
<description><![CDATA[  <table width="500">
<tr><td>Country: <b>IRQ</b></td><td>Flare ID: <b>vnfdb_2012_08692</b></td></tr>
<tr><td colspan="2">Combustion parameters:</td></tr>
<tr><td>Lat=30.402233, Lon=47.333672 deg.</td><td>Tavg=1591.35 K, RHsum=5.00188 MW</td></tr>
<tr><td>Freq. detect.=95.37 %</td><td>Area=36.89 m2</td></tr>
<tr><td>BCM=0.137</td><td>Type: upstream</td></tr>
</table>]]></description><Point>
<coordinates>47.333672,30.402233,0</coordinates>
</Point>
</Placemark>
<Placemark>
<Style id="highlightPlacemark190">
<IconStyle>
<scale>0.75</scale>
<Icon>
<href>http://maps.google.com/mapfiles/ms/micons/red.png</href>
</Icon>
</IconStyle>
<LabelStyle>
<scale>0</scale>
</LabelStyle>
</Style>
<name>Rank 190</name>
<description><![CDATA[  <table width="500">
<tr><td>Country: <b>TKM</b></td><td>Flare ID: <b>vnfdb_2012_09345</b></td></tr>
<tr><td colspan="2">Combustion parameters:</td></tr>
<tr><td>Lat=37.929515, Lon=53.922306 deg.</td><td>Tavg=1798.69 K, RHsum=4.97987 MW</td></tr>
<tr><td>Freq. detect.=95.03 %</td><td>Area=18.30 m2</td></tr>
<tr><td>BCM=0.136</td><td>Type: upstream</td></tr>
</table>]]></description><Point>
<coordinates>53.922306,37.929515,0</coordinates>
</Point>
</Placemark>
<Placemark>
<Style id="highlightPlacemark191">
<IconStyle>
<scale>0.75</scale>
<Icon>
<href>http://maps.google.com/mapfiles/ms/micons/red.png</href>
</Icon>
</IconStyle>
<LabelStyle>
<scale>0</scale>
</LabelStyle>
</Style>
<name>Rank 191</name>
<description><![CDATA[  <table width="500">
<tr><td>Country: <b>MEX</b></td><td>Flare ID: <b>vnfdb_2012_05642</b></td></tr>
<tr><td colspan="2">Combustion parameters:</td></tr>
<tr><td>Lat=19.380564, Lon=-92.053763 deg.</td><td>Tavg=1669.84 K, RHsum=4.97013 MW</td></tr>
<tr><td>Freq. detect.=94.67 %</td><td>Area=26.30 m2</td></tr>
<tr><td>BCM=0.136</td><td>Type: upstream</td></tr>
</table>]]></description><Point>
<coordinates>-92.053763,19.380564,0</coordinates>
</Point>
</Placemark>
<Placemark>
<Style id="highlightPlacemark192">
<IconStyle>
<scale>0.75</scale>
<Icon>
<href>http://maps.google.com/mapfiles/ms/micons/red.png</href>
</Icon>
</IconStyle>
<LabelStyle>
<scale>0</scale>
</LabelStyle>
</Style>
<name>Rank 192</name>
<description><![CDATA[  <table width="500">
<tr><td>Country: <b>DZA</b></td><td>Flare ID: <b>vnfdb_2012_08022</b></td></tr>
<tr><td colspan="2">Combustion parameters:</td></tr>
<tr><td>Lat=31.232190, Lon=8.562158 deg.</td><td>Tavg=1656.71 K, RHsum=4.9686 MW</td></tr>
<tr><td>Freq. detect.=96.33 %</td><td>Area=36.44 m2</td></tr>
<tr><td>BCM=0.136</td><td>Type: upstream</td></tr>
</table>]]></description><Point>
<coordinates>8.562158,31.232190,0</coordinates>
</Point>
</Placemark>
<Placemark>
<Style id="highlightPlacemark193">
<IconStyle>
<scale>0.75</scale>
<Icon>
<href>http://maps.google.com/mapfiles/ms/micons/red.png</href>
</Icon>
</IconStyle>
<LabelStyle>
<scale>0</scale>
</LabelStyle>
</Style>
<name>Rank 193</name>
<description><![CDATA[  <table width="500">
<tr><td>Country: <b>DZA</b></td><td>Flare ID: <b>vnfdb_2012_08004</b></td></tr>
<tr><td colspan="2">Combustion parameters:</td></tr>
<tr><td>Lat=28.576927, Lon=7.654932 deg.</td><td>Tavg=1773.14 K, RHsum=4.96016 MW</td></tr>
<tr><td>Freq. detect.=96.50 %</td><td>Area=19.26 m2</td></tr>
<tr><td>BCM=0.136</td><td>Type: upstream</td></tr>
</table>]]></description><Point>
<coordinates>7.654932,28.576927,0</coordinates>
</Point>
</Placemark>
<Placemark>
<Style id="highlightPlacemark194">
<IconStyle>
<scale>0.75</scale>
<Icon>
<href>http://maps.google.com/mapfiles/ms/micons/red.png</href>
</Icon>
</IconStyle>
<LabelStyle>
<scale>0</scale>
</LabelStyle>
</Style>
<name>Rank 194</name>
<description><![CDATA[  <table width="500">
<tr><td>Country: <b>RUS</b></td><td>Flare ID: <b>vnfdb_2012_10477</b></td></tr>
<tr><td colspan="2">Combustion parameters:</td></tr>
<tr><td>Lat=60.970654, Lon=73.849039 deg.</td><td>Tavg=1752.68 K, RHsum=4.95263 MW</td></tr>
<tr><td>Freq. detect.=85.15 %</td><td>Area=20.37 m2</td></tr>
<tr><td>BCM=0.136</td><td>Type: upstream</td></tr>
</table>]]></description><Point>
<coordinates>73.849039,60.970654,0</coordinates>
</Point>
</Placemark>
<Placemark>
<Style id="highlightPlacemark195">
<IconStyle>
<scale>0.75</scale>
<Icon>
<href>http://maps.google.com/mapfiles/ms/micons/red.png</href>
</Icon>
</IconStyle>
<LabelStyle>
<scale>0</scale>
</LabelStyle>
</Style>
<name>Rank 195</name>
<description><![CDATA[  <table width="500">
<tr><td>Country: <b>IRN</b></td><td>Flare ID: <b>vnfdb_2012_09038</b></td></tr>
<tr><td colspan="2">Combustion parameters:</td></tr>
<tr><td>Lat=29.293483, Lon=49.548005 deg.</td><td>Tavg=1619.8 K, RHsum=4.94593 MW</td></tr>
<tr><td>Freq. detect.=93.53 %</td><td>Area=37.21 m2</td></tr>
<tr><td>BCM=0.136</td><td>Type: upstream</td></tr>
</table>]]></description><Point>
<coordinates>49.548005,29.293483,0</coordinates>
</Point>
</Placemark>
<Placemark>
<Style id="highlightPlacemark196">
<IconStyle>
<scale>0.75</scale>
<Icon>
<href>http://maps.google.com/mapfiles/ms/micons/red.png</href>
</Icon>
</IconStyle>
<LabelStyle>
<scale>0</scale>
</LabelStyle>
</Style>
<name>Rank 196</name>
<description><![CDATA[  <table width="500">
<tr><td>Country: <b>NGA</b></td><td>Flare ID: <b>vnfdb_2012_09684</b></td></tr>
<tr><td colspan="2">Combustion parameters:</td></tr>
<tr><td>Lat=4.552752, Lon=8.010288 deg.</td><td>Tavg=1772.18 K, RHsum=4.93485 MW</td></tr>
<tr><td>Freq. detect.=94.75 %</td><td>Area=23.23 m2</td></tr>
<tr><td>BCM=0.135</td><td>Type: upstream</td></tr>
</table>]]></description><Point>
<coordinates>8.010288,4.552752,0</coordinates>
</Point>
</Placemark>
<Placemark>
<Style id="highlightPlacemark197">
<IconStyle>
<scale>0.75</scale>
<Icon>
<href>http://maps.google.com/mapfiles/ms/micons/red.png</href>
</Icon>
</IconStyle>
<LabelStyle>
<scale>0</scale>
</LabelStyle>
</Style>
<name>Rank 197</name>
<description><![CDATA[  <table width="500">
<tr><td>Country: <b>DZA</b></td><td>Flare ID: <b>vnfdb_2012_08071</b></td></tr>
<tr><td colspan="2">Combustion parameters:</td></tr>
<tr><td>Lat=28.634971, Lon=9.785057 deg.</td><td>Tavg=1662.27 K, RHsum=4.93123 MW</td></tr>
<tr><td>Freq. detect.=96.21 %</td><td>Area=28.36 m2</td></tr>
<tr><td>BCM=0.135</td><td>Type: upstream</td></tr>
</table>]]></description><Point>
<coordinates>9.785057,28.634971,0</coordinates>
</Point>
</Placemark>
<Placemark>
<Style id="highlightPlacemark198">
<IconStyle>
<scale>0.75</scale>
<Icon>
<href>http://maps.google.com/mapfiles/ms/micons/red.png</href>
</Icon>
</IconStyle>
<LabelStyle>
<scale>0</scale>
</LabelStyle>
</Style>
<name>Rank 198</name>
<description><![CDATA[  <table width="500">
<tr><td>Country: <b>RUS</b></td><td>Flare ID: <b>vnfdb_2012_10955</b></td></tr>
<tr><td colspan="2">Combustion parameters:</td></tr>
<tr><td>Lat=63.968258, Lon=79.549696 deg.</td><td>Tavg=1723.44 K, RHsum=4.91139 MW</td></tr>
<tr><td>Freq. detect.=83.85 %</td><td>Area=21.03 m2</td></tr>
<tr><td>BCM=0.135</td><td>Type: upstream</td></tr>
</table>]]></description><Point>
<coordinates>79.549696,63.968258,0</coordinates>
</Point>
</Placemark>
<Placemark>
<Style id="highlightPlacemark199">
<IconStyle>
<scale>0.75</scale>
<Icon>
<href>http://maps.google.com/mapfiles/ms/micons/red.png</href>
</Icon>
</IconStyle>
<LabelStyle>
<scale>0</scale>
</LabelStyle>
</Style>
<name>Rank 199</name>
<description><![CDATA[  <table width="500">
<tr><td>Country: <b>IRN</b></td><td>Flare ID: <b>vnfdb_2012_09308</b></td></tr>
<tr><td colspan="2">Combustion parameters:</td></tr>
<tr><td>Lat=25.505145, Lon=53.149111 deg.</td><td>Tavg=1666.21 K, RHsum=4.89774 MW</td></tr>
<tr><td>Freq. detect.=92.80 %</td><td>Area=29.10 m2</td></tr>
<tr><td>BCM=0.134</td><td>Type: upstream</td></tr>
</table>]]></description><Point>
<coordinates>53.149111,25.505145,0</coordinates>
</Point>
</Placemark>
<Placemark>
<Style id="highlightPlacemark200">
<IconStyle>
<scale>0.75</scale>
<Icon>
<href>http://maps.google.com/mapfiles/ms/micons/red.png</href>
</Icon>
</IconStyle>
<LabelStyle>
<scale>0</scale>
</LabelStyle>
</Style>
<name>Rank 200</name>
<description><![CDATA[  <table width="500">
<tr><td>Country: <b>RUS</b></td><td>Flare ID: <b>vnfdb_2012_10490</b></td></tr>
<tr><td colspan="2">Combustion parameters:</td></tr>
<tr><td>Lat=58.702245, Lon=73.993041 deg.</td><td>Tavg=1782.39 K, RHsum=4.89045 MW</td></tr>
<tr><td>Freq. detect.=91.56 %</td><td>Area=19.42 m2</td></tr>
<tr><td>BCM=0.134</td><td>Type: upstream</td></tr>
</table>]]></description><Point>
<coordinates>73.993041,58.702245,0</coordinates>
</Point>
</Placemark>
<Placemark>
<Style id="highlightPlacemark201">
<IconStyle>
<scale>0.75</scale>
<Icon>
<href>http://maps.google.com/mapfiles/ms/micons/red.png</href>
</Icon>
</IconStyle>
<LabelStyle>
<scale>0</scale>
</LabelStyle>
</Style>
<name>Rank 201</name>
<description><![CDATA[  <table width="500">
<tr><td>Country: <b>EGY</b></td><td>Flare ID: <b>vnfdb_2012_08289</b></td></tr>
<tr><td colspan="2">Combustion parameters:</td></tr>
<tr><td>Lat=30.771042, Lon=27.105642 deg.</td><td>Tavg=1725.2 K, RHsum=4.87435 MW</td></tr>
<tr><td>Freq. detect.=96.97 %</td><td>Area=23.59 m2</td></tr>
<tr><td>BCM=0.134</td><td>Type: upstream</td></tr>
</table>]]></description><Point>
<coordinates>27.105642,30.771042,0</coordinates>
</Point>
</Placemark>
<Placemark>
<Style id="highlightPlacemark202">
<IconStyle>
<scale>0.75</scale>
<Icon>
<href>http://maps.google.com/mapfiles/ms/micons/red.png</href>
</Icon>
</IconStyle>
<LabelStyle>
<scale>0</scale>
</LabelStyle>
</Style>
<name>Rank 202</name>
<description><![CDATA[  <table width="500">
<tr><td>Country: <b>DZA</b></td><td>Flare ID: <b>vnfdb_2012_07700</b></td></tr>
<tr><td colspan="2">Combustion parameters:</td></tr>
<tr><td>Lat=32.555443, Lon=3.167300 deg.</td><td>Tavg=1726.38 K, RHsum=4.83884 MW</td></tr>
<tr><td>Freq. detect.=91.76 %</td><td>Area=25.00 m2</td></tr>
<tr><td>BCM=0.133</td><td>Type: upstream</td></tr>
</table>]]></description><Point>
<coordinates>3.167300,32.555443,0</coordinates>
</Point>
</Placemark>
<Placemark>
<Style id="highlightPlacemark203">
<IconStyle>
<scale>0.75</scale>
<Icon>
<href>http://maps.google.com/mapfiles/ms/micons/red.png</href>
</Icon>
</IconStyle>
<LabelStyle>
<scale>0</scale>
</LabelStyle>
</Style>
<name>Rank 203</name>
<description><![CDATA[  <table width="500">
<tr><td>Country: <b>DZA</b></td><td>Flare ID: <b>vnfdb_2012_07980</b></td></tr>
<tr><td colspan="2">Combustion parameters:</td></tr>
<tr><td>Lat=31.189056, Lon=6.787872 deg.</td><td>Tavg=1705.31 K, RHsum=4.83016 MW</td></tr>
<tr><td>Freq. detect.=98.06 %</td><td>Area=23.67 m2</td></tr>
<tr><td>BCM=0.132</td><td>Type: upstream</td></tr>
</table>]]></description><Point>
<coordinates>6.787872,31.189056,0</coordinates>
</Point>
</Placemark>
<Placemark>
<Style id="highlightPlacemark204">
<IconStyle>
<scale>0.75</scale>
<Icon>
<href>http://maps.google.com/mapfiles/ms/micons/red.png</href>
</Icon>
</IconStyle>
<LabelStyle>
<scale>0</scale>
</LabelStyle>
</Style>
<name>Rank 204</name>
<description><![CDATA[  <table width="500">
<tr><td>Country: <b>IRQ</b></td><td>Flare ID: <b>vnfdb_2012_08735</b></td></tr>
<tr><td colspan="2">Combustion parameters:</td></tr>
<tr><td>Lat=30.454810, Lon=47.668078 deg.</td><td>Tavg=1651.41 K, RHsum=4.82822 MW</td></tr>
<tr><td>Freq. detect.=95.50 %</td><td>Area=33.37 m2</td></tr>
<tr><td>BCM=0.132</td><td>Type: upstream</td></tr>
</table>]]></description><Point>
<coordinates>47.668078,30.454810,0</coordinates>
</Point>
</Placemark>
<Placemark>
<Style id="highlightPlacemark205">
<IconStyle>
<scale>0.75</scale>
<Icon>
<href>http://maps.google.com/mapfiles/ms/micons/red.png</href>
</Icon>
</IconStyle>
<LabelStyle>
<scale>0</scale>
</LabelStyle>
</Style>
<name>Rank 205</name>
<description><![CDATA[  <table width="500">
<tr><td>Country: <b>IRQ</b></td><td>Flare ID: <b>vnfdb_2012_08706</b></td></tr>
<tr><td colspan="2">Combustion parameters:</td></tr>
<tr><td>Lat=30.425855, Lon=47.443024 deg.</td><td>Tavg=1708.25 K, RHsum=4.82227 MW</td></tr>
<tr><td>Freq. detect.=81.14 %</td><td>Area=25.52 m2</td></tr>
<tr><td>BCM=0.132</td><td>Type: upstream</td></tr>
</table>]]></description><Point>
<coordinates>47.443024,30.425855,0</coordinates>
</Point>
</Placemark>
<Placemark>
<Style id="highlightPlacemark206">
<IconStyle>
<scale>0.75</scale>
<Icon>
<href>http://maps.google.com/mapfiles/ms/micons/red.png</href>
</Icon>
</IconStyle>
<LabelStyle>
<scale>0</scale>
</LabelStyle>
</Style>
<name>Rank 206</name>
<description><![CDATA[  <table width="500">
<tr><td>Country: <b>IND</b></td><td>Flare ID: <b>vnfdb_2012_11596</b></td></tr>
<tr><td colspan="2">Combustion parameters:</td></tr>
<tr><td>Lat=18.578483, Lon=72.240218 deg.</td><td>Tavg=1590.2 K, RHsum=4.809 MW</td></tr>
<tr><td>Freq. detect.=94.84 %</td><td>Area=39.65 m2</td></tr>
<tr><td>BCM=0.132</td><td>Type: upstream</td></tr>
</table>]]></description><Point>
<coordinates>72.240218,18.578483,0</coordinates>
</Point>
</Placemark>
<Placemark>
<Style id="highlightPlacemark207">
<IconStyle>
<scale>0.75</scale>
<Icon>
<href>http://maps.google.com/mapfiles/kml/shapes/firedept.png</href>
</Icon>
</IconStyle>
<LabelStyle>
<scale>0</scale>
</LabelStyle>
</Style>
<name>Rank 207</name>
<description><![CDATA[  <table width="500">
<tr><td>Country: <b>IDN</b></td><td>Flare ID: <b>vnfdb_2012_13067</b></td></tr>
<tr><td colspan="2">Combustion parameters:</td></tr>
<tr><td>Lat=-2.438270, Lon=133.138334 deg.</td><td>Tavg=1695.37 K, RHsum=4.80815 MW</td></tr>
<tr><td>Freq. detect.=82.28 %</td><td>Area=18.09 m2</td></tr>
<tr><td>BCM=0.132</td><td>Type: LNG</td></tr>
</table>]]></description><Point>
<coordinates>133.138334,-2.438270,0</coordinates>
</Point>
</Placemark>
<Placemark>
<Style id="highlightPlacemark208">
<IconStyle>
<scale>0.75</scale>
<Icon>
<href>http://maps.google.com/mapfiles/ms/micons/red.png</href>
</Icon>
</IconStyle>
<LabelStyle>
<scale>0</scale>
</LabelStyle>
</Style>
<name>Rank 208</name>
<description><![CDATA[  <table width="500">
<tr><td>Country: <b>DZA</b></td><td>Flare ID: <b>vnfdb_2012_07873</b></td></tr>
<tr><td colspan="2">Combustion parameters:</td></tr>
<tr><td>Lat=31.631212, Lon=5.980667 deg.</td><td>Tavg=1633.96 K, RHsum=4.79945 MW</td></tr>
<tr><td>Freq. detect.=92.66 %</td><td>Area=35.10 m2</td></tr>
<tr><td>BCM=0.132</td><td>Type: upstream</td></tr>
</table>]]></description><Point>
<coordinates>5.980667,31.631212,0</coordinates>
</Point>
</Placemark>
<Placemark>
<Style id="highlightPlacemark209">
<IconStyle>
<scale>0.75</scale>
<Icon>
<href>http://maps.google.com/mapfiles/ms/micons/red.png</href>
</Icon>
</IconStyle>
<LabelStyle>
<scale>0</scale>
</LabelStyle>
</Style>
<name>Rank 209</name>
<description><![CDATA[  <table width="500">
<tr><td>Country: <b>UZB</b></td><td>Flare ID: <b>vnfdb_2012_11459</b></td></tr>
<tr><td colspan="2">Combustion parameters:</td></tr>
<tr><td>Lat=39.220871, Lon=64.559171 deg.</td><td>Tavg=1771.88 K, RHsum=4.78989 MW</td></tr>
<tr><td>Freq. detect.=96.95 %</td><td>Area=15.83 m2</td></tr>
<tr><td>BCM=0.131</td><td>Type: upstream</td></tr>
</table>]]></description><Point>
<coordinates>64.559171,39.220871,0</coordinates>
</Point>
</Placemark>
<Placemark>
<Style id="highlightPlacemark210">
<IconStyle>
<scale>0.75</scale>
<Icon>
<href>http://maps.google.com/mapfiles/ms/micons/red.png</href>
</Icon>
</IconStyle>
<LabelStyle>
<scale>0</scale>
</LabelStyle>
</Style>
<name>Rank 210</name>
<description><![CDATA[  <table width="500">
<tr><td>Country: <b>EGY</b></td><td>Flare ID: <b>vnfdb_2012_08420</b></td></tr>
<tr><td colspan="2">Combustion parameters:</td></tr>
<tr><td>Lat=27.878838, Lon=33.439748 deg.</td><td>Tavg=1786.29 K, RHsum=4.78897 MW</td></tr>
<tr><td>Freq. detect.=95.23 %</td><td>Area=16.03 m2</td></tr>
<tr><td>BCM=0.131</td><td>Type: upstream</td></tr>
</table>]]></description><Point>
<coordinates>33.439748,27.878838,0</coordinates>
</Point>
</Placemark>
<Placemark>
<Style id="highlightPlacemark211">
<IconStyle>
<scale>0.75</scale>
<Icon>
<href>http://maps.google.com/mapfiles/ms/micons/red.png</href>
</Icon>
</IconStyle>
<LabelStyle>
<scale>0</scale>
</LabelStyle>
</Style>
<name>Rank 211</name>
<description><![CDATA[  <table width="500">
<tr><td>Country: <b>RUS</b></td><td>Flare ID: <b>vnfdb_2012_07410</b></td></tr>
<tr><td colspan="2">Combustion parameters:</td></tr>
<tr><td>Lat=52.488135, Lon=53.272025 deg.</td><td>Tavg=1703.86 K, RHsum=4.78863 MW</td></tr>
<tr><td>Freq. detect.=90.61 %</td><td>Area=28.33 m2</td></tr>
<tr><td>BCM=0.131</td><td>Type: upstream</td></tr>
</table>]]></description><Point>
<coordinates>53.272025,52.488135,0</coordinates>
</Point>
</Placemark>
<Placemark>
<Style id="highlightPlacemark212">
<IconStyle>
<scale>0.75</scale>
<Icon>
<href>http://maps.google.com/mapfiles/kml/shapes/gas_stations.png</href>
</Icon>
</IconStyle>
<LabelStyle>
<scale>0</scale>
</LabelStyle>
</Style>
<name>Rank 212</name>
<description><![CDATA[  <table width="500">
<tr><td>Country: <b>MEX</b></td><td>Flare ID: <b>vnfdb_2012_05584</b></td></tr>
<tr><td colspan="2">Combustion parameters:</td></tr>
<tr><td>Lat=18.441478, Lon=-93.166226 deg.</td><td>Tavg=1655.1 K, RHsum=4.76654 MW</td></tr>
<tr><td>Freq. detect.=94.45 %</td><td>Area=36.18 m2</td></tr>
<tr><td>BCM=0.131</td><td>Type: downstream</td></tr>
</table>]]></description><Point>
<coordinates>-93.166226,18.441478,0</coordinates>
</Point>
</Placemark>
<Placemark>
<Style id="highlightPlacemark213">
<IconStyle>
<scale>0.75</scale>
<Icon>
<href>http://maps.google.com/mapfiles/ms/micons/red.png</href>
</Icon>
</IconStyle>
<LabelStyle>
<scale>0</scale>
</LabelStyle>
</Style>
<name>Rank 213</name>
<description><![CDATA[  <table width="500">
<tr><td>Country: <b>IRQ</b></td><td>Flare ID: <b>vnfdb_2012_08730</b></td></tr>
<tr><td colspan="2">Combustion parameters:</td></tr>
<tr><td>Lat=30.369165, Lon=47.636495 deg.</td><td>Tavg=1654.21 K, RHsum=4.76212 MW</td></tr>
<tr><td>Freq. detect.=95.08 %</td><td>Area=30.38 m2</td></tr>
<tr><td>BCM=0.13</td><td>Type: upstream</td></tr>
</table>]]></description><Point>
<coordinates>47.636495,30.369165,0</coordinates>
</Point>
</Placemark>
<Placemark>
<Style id="highlightPlacemark214">
<IconStyle>
<scale>0.75</scale>
<Icon>
<href>http://maps.google.com/mapfiles/ms/micons/red.png</href>
</Icon>
</IconStyle>
<LabelStyle>
<scale>0</scale>
</LabelStyle>
</Style>
<name>Rank 214</name>
<description><![CDATA[  <table width="500">
<tr><td>Country: <b>KAZ</b></td><td>Flare ID: <b>vnfdb_2012_10238</b></td></tr>
<tr><td colspan="2">Combustion parameters:</td></tr>
<tr><td>Lat=46.051336, Lon=65.045597 deg.</td><td>Tavg=1798.21 K, RHsum=4.74646 MW</td></tr>
<tr><td>Freq. detect.=94.67 %</td><td>Area=17.13 m2</td></tr>
<tr><td>BCM=0.13</td><td>Type: upstream</td></tr>
</table>]]></description><Point>
<coordinates>65.045597,46.051336,0</coordinates>
</Point>
</Placemark>
<Placemark>
<Style id="highlightPlacemark215">
<IconStyle>
<scale>0.75</scale>
<Icon>
<href>http://maps.google.com/mapfiles/ms/micons/red.png</href>
</Icon>
</IconStyle>
<LabelStyle>
<scale>0</scale>
</LabelStyle>
</Style>
<name>Rank 215</name>
<description><![CDATA[  <table width="500">
<tr><td>Country: <b>DZA</b></td><td>Flare ID: <b>vnfdb_2012_07885</b></td></tr>
<tr><td colspan="2">Combustion parameters:</td></tr>
<tr><td>Lat=31.633521, Lon=6.062196 deg.</td><td>Tavg=1670.99 K, RHsum=4.73928 MW</td></tr>
<tr><td>Freq. detect.=96.88 %</td><td>Area=27.10 m2</td></tr>
<tr><td>BCM=0.13</td><td>Type: upstream</td></tr>
</table>]]></description><Point>
<coordinates>6.062196,31.633521,0</coordinates>
</Point>
</Placemark>
<Placemark>
<Style id="highlightPlacemark216">
<IconStyle>
<scale>0.75</scale>
<Icon>
<href>http://maps.google.com/mapfiles/ms/micons/red.png</href>
</Icon>
</IconStyle>
<LabelStyle>
<scale>0</scale>
</LabelStyle>
</Style>
<name>Rank 216</name>
<description><![CDATA[  <table width="500">
<tr><td>Country: <b>VEN</b></td><td>Flare ID: <b>vnfdb_2012_05931</b></td></tr>
<tr><td colspan="2">Combustion parameters:</td></tr>
<tr><td>Lat=9.387585, Lon=-64.546653 deg.</td><td>Tavg=1655.73 K, RHsum=4.73031 MW</td></tr>
<tr><td>Freq. detect.=99.17 %</td><td>Area=27.80 m2</td></tr>
<tr><td>BCM=0.13</td><td>Type: upstream</td></tr>
</table>]]></description><Point>
<coordinates>-64.546653,9.387585,0</coordinates>
</Point>
</Placemark>
<Placemark>
<Style id="highlightPlacemark217">
<IconStyle>
<scale>0.75</scale>
<Icon>
<href>http://maps.google.com/mapfiles/ms/micons/red.png</href>
</Icon>
</IconStyle>
<LabelStyle>
<scale>0</scale>
</LabelStyle>
</Style>
<name>Rank 217</name>
<description><![CDATA[  <table width="500">
<tr><td>Country: <b>NGA</b></td><td>Flare ID: <b>vnfdb_2012_07763</b></td></tr>
<tr><td colspan="2">Combustion parameters:</td></tr>
<tr><td>Lat=5.686314, Lon=5.052860 deg.</td><td>Tavg=1690.28 K, RHsum=4.72931 MW</td></tr>
<tr><td>Freq. detect.=95.11 %</td><td>Area=26.90 m2</td></tr>
<tr><td>BCM=0.13</td><td>Type: upstream</td></tr>
</table>]]></description><Point>
<coordinates>5.052860,5.686314,0</coordinates>
</Point>
</Placemark>
<Placemark>
<Style id="highlightPlacemark218">
<IconStyle>
<scale>0.75</scale>
<Icon>
<href>http://maps.google.com/mapfiles/ms/micons/red.png</href>
</Icon>
</IconStyle>
<LabelStyle>
<scale>0</scale>
</LabelStyle>
</Style>
<name>Rank 218</name>
<description><![CDATA[  <table width="500">
<tr><td>Country: <b>AGO</b></td><td>Flare ID: <b>vnfdb_2012_09902</b></td></tr>
<tr><td colspan="2">Combustion parameters:</td></tr>
<tr><td>Lat=-7.118540, Lon=12.364797 deg.</td><td>Tavg=1655.58 K, RHsum=4.72079 MW</td></tr>
<tr><td>Freq. detect.=90.29 %</td><td>Area=25.38 m2</td></tr>
<tr><td>BCM=0.129</td><td>Type: upstream</td></tr>
</table>]]></description><Point>
<coordinates>12.364797,-7.118540,0</coordinates>
</Point>
</Placemark>
<Placemark>
<Style id="highlightPlacemark219">
<IconStyle>
<scale>0.75</scale>
<Icon>
<href>http://maps.google.com/mapfiles/ms/micons/red.png</href>
</Icon>
</IconStyle>
<LabelStyle>
<scale>0</scale>
</LabelStyle>
</Style>
<name>Rank 219</name>
<description><![CDATA[  <table width="500">
<tr><td>Country: <b>RUS</b></td><td>Flare ID: <b>vnfdb_2012_07570</b></td></tr>
<tr><td colspan="2">Combustion parameters:</td></tr>
<tr><td>Lat=65.008184, Lon=56.919443 deg.</td><td>Tavg=1740.33 K, RHsum=4.70032 MW</td></tr>
<tr><td>Freq. detect.=92.92 %</td><td>Area=24.31 m2</td></tr>
<tr><td>BCM=0.129</td><td>Type: upstream</td></tr>
</table>]]></description><Point>
<coordinates>56.919443,65.008184,0</coordinates>
</Point>
</Placemark>
<Placemark>
<Style id="highlightPlacemark220">
<IconStyle>
<scale>0.75</scale>
<Icon>
<href>http://maps.google.com/mapfiles/ms/micons/red.png</href>
</Icon>
</IconStyle>
<LabelStyle>
<scale>0</scale>
</LabelStyle>
</Style>
<name>Rank 220</name>
<description><![CDATA[  <table width="500">
<tr><td>Country: <b>OMN</b></td><td>Flare ID: <b>vnfdb_2012_09405</b></td></tr>
<tr><td colspan="2">Combustion parameters:</td></tr>
<tr><td>Lat=18.689398, Lon=55.503514 deg.</td><td>Tavg=1798.56 K, RHsum=4.68557 MW</td></tr>
<tr><td>Freq. detect.=94.77 %</td><td>Area=21.52 m2</td></tr>
<tr><td>BCM=0.128</td><td>Type: upstream</td></tr>
</table>]]></description><Point>
<coordinates>55.503514,18.689398,0</coordinates>
</Point>
</Placemark>
<Placemark>
<Style id="highlightPlacemark221">
<IconStyle>
<scale>0.75</scale>
<Icon>
<href>http://maps.google.com/mapfiles/ms/micons/red.png</href>
</Icon>
</IconStyle>
<LabelStyle>
<scale>0</scale>
</LabelStyle>
</Style>
<name>Rank 221</name>
<description><![CDATA[  <table width="500">
<tr><td>Country: <b>LBY</b></td><td>Flare ID: <b>vnfdb_2012_08164</b></td></tr>
<tr><td colspan="2">Combustion parameters:</td></tr>
<tr><td>Lat=28.976185, Lon=17.464635 deg.</td><td>Tavg=1689.78 K, RHsum=4.67388 MW</td></tr>
<tr><td>Freq. detect.=97.81 %</td><td>Area=25.08 m2</td></tr>
<tr><td>BCM=0.128</td><td>Type: upstream</td></tr>
</table>]]></description><Point>
<coordinates>17.464635,28.976185,0</coordinates>
</Point>
</Placemark>
<Placemark>
<Style id="highlightPlacemark222">
<IconStyle>
<scale>0.75</scale>
<Icon>
<href>http://maps.google.com/mapfiles/ms/micons/red.png</href>
</Icon>
</IconStyle>
<LabelStyle>
<scale>0</scale>
</LabelStyle>
</Style>
<name>Rank 222</name>
<description><![CDATA[  <table width="500">
<tr><td>Country: <b>RUS</b></td><td>Flare ID: <b>vnfdb_2012_10496</b></td></tr>
<tr><td colspan="2">Combustion parameters:</td></tr>
<tr><td>Lat=60.515956, Lon=74.106441 deg.</td><td>Tavg=1795.01 K, RHsum=4.65597 MW</td></tr>
<tr><td>Freq. detect.=88.73 %</td><td>Area=18.01 m2</td></tr>
<tr><td>BCM=0.128</td><td>Type: upstream</td></tr>
</table>]]></description><Point>
<coordinates>74.106441,60.515956,0</coordinates>
</Point>
</Placemark>
<Placemark>
<Style id="highlightPlacemark223">
<IconStyle>
<scale>0.75</scale>
<Icon>
<href>http://maps.google.com/mapfiles/ms/micons/red.png</href>
</Icon>
</IconStyle>
<LabelStyle>
<scale>0</scale>
</LabelStyle>
</Style>
<name>Rank 223</name>
<description><![CDATA[  <table width="500">
<tr><td>Country: <b>QAT</b></td><td>Flare ID: <b>vnfdb_2012_09183</b></td></tr>
<tr><td colspan="2">Combustion parameters:</td></tr>
<tr><td>Lat=25.382233, Lon=50.798158 deg.</td><td>Tavg=1681.17 K, RHsum=4.64261 MW</td></tr>
<tr><td>Freq. detect.=83.24 %</td><td>Area=29.74 m2</td></tr>
<tr><td>BCM=0.127</td><td>Type: upstream</td></tr>
</table>]]></description><Point>
<coordinates>50.798158,25.382233,0</coordinates>
</Point>
</Placemark>
<Placemark>
<Style id="highlightPlacemark224">
<IconStyle>
<scale>0.75</scale>
<Icon>
<href>http://maps.google.com/mapfiles/ms/micons/red.png</href>
</Icon>
</IconStyle>
<LabelStyle>
<scale>0</scale>
</LabelStyle>
</Style>
<name>Rank 224</name>
<description><![CDATA[  <table width="500">
<tr><td>Country: <b>NGA</b></td><td>Flare ID: <b>vnfdb_2012_09520</b></td></tr>
<tr><td colspan="2">Combustion parameters:</td></tr>
<tr><td>Lat=4.881344, Lon=5.614604 deg.</td><td>Tavg=1656.42 K, RHsum=4.6421 MW</td></tr>
<tr><td>Freq. detect.=94.70 %</td><td>Area=28.00 m2</td></tr>
<tr><td>BCM=0.127</td><td>Type: upstream</td></tr>
</table>]]></description><Point>
<coordinates>5.614604,4.881344,0</coordinates>
</Point>
</Placemark>
<Placemark>
<Style id="highlightPlacemark225">
<IconStyle>
<scale>0.75</scale>
<Icon>
<href>http://maps.google.com/mapfiles/ms/micons/red.png</href>
</Icon>
</IconStyle>
<LabelStyle>
<scale>0</scale>
</LabelStyle>
</Style>
<name>Rank 225</name>
<description><![CDATA[  <table width="500">
<tr><td>Country: <b>IRN</b></td><td>Flare ID: <b>vnfdb_2012_08922</b></td></tr>
<tr><td colspan="2">Combustion parameters:</td></tr>
<tr><td>Lat=31.301729, Lon=49.118502 deg.</td><td>Tavg=1676.41 K, RHsum=4.6357 MW</td></tr>
<tr><td>Freq. detect.=96.94 %</td><td>Area=26.43 m2</td></tr>
<tr><td>BCM=0.127</td><td>Type: upstream</td></tr>
</table>]]></description><Point>
<coordinates>49.118502,31.301729,0</coordinates>
</Point>
</Placemark>
<Placemark>
<Style id="highlightPlacemark226">
<IconStyle>
<scale>0.75</scale>
<Icon>
<href>http://maps.google.com/mapfiles/ms/micons/red.png</href>
</Icon>
</IconStyle>
<LabelStyle>
<scale>0</scale>
</LabelStyle>
</Style>
<name>Rank 226</name>
<description><![CDATA[  <table width="500">
<tr><td>Country: <b>KAZ</b></td><td>Flare ID: <b>vnfdb_2012_10234</b></td></tr>
<tr><td colspan="2">Combustion parameters:</td></tr>
<tr><td>Lat=46.466309, Lon=64.992857 deg.</td><td>Tavg=1782.77 K, RHsum=4.61548 MW</td></tr>
<tr><td>Freq. detect.=93.24 %</td><td>Area=18.55 m2</td></tr>
<tr><td>BCM=0.126</td><td>Type: upstream</td></tr>
</table>]]></description><Point>
<coordinates>64.992857,46.466309,0</coordinates>
</Point>
</Placemark>
<Placemark>
<Style id="highlightPlacemark227">
<IconStyle>
<scale>0.75</scale>
<Icon>
<href>http://maps.google.com/mapfiles/ms/micons/red.png</href>
</Icon>
</IconStyle>
<LabelStyle>
<scale>0</scale>
</LabelStyle>
</Style>
<name>Rank 227</name>
<description><![CDATA[  <table width="500">
<tr><td>Country: <b>KAZ</b></td><td>Flare ID: <b>vnfdb_2012_07424</b></td></tr>
<tr><td colspan="2">Combustion parameters:</td></tr>
<tr><td>Lat=46.156713, Lon=53.408855 deg.</td><td>Tavg=1678.03 K, RHsum=4.61242 MW</td></tr>
<tr><td>Freq. detect.=77.51 %</td><td>Area=46.68 m2</td></tr>
<tr><td>BCM=0.126</td><td>Type: upstream</td></tr>
</table>]]></description><Point>
<coordinates>53.408855,46.156713,0</coordinates>
</Point>
</Placemark>
<Placemark>
<Style id="highlightPlacemark228">
<IconStyle>
<scale>0.75</scale>
<Icon>
<href>http://maps.google.com/mapfiles/ms/micons/red.png</href>
</Icon>
</IconStyle>
<LabelStyle>
<scale>0</scale>
</LabelStyle>
</Style>
<name>Rank 228</name>
<description><![CDATA[  <table width="500">
<tr><td>Country: <b>RUS</b></td><td>Flare ID: <b>vnfdb_2012_10306</b></td></tr>
<tr><td colspan="2">Combustion parameters:</td></tr>
<tr><td>Lat=61.426302, Lon=67.262435 deg.</td><td>Tavg=1782.32 K, RHsum=4.59525 MW</td></tr>
<tr><td>Freq. detect.=88.90 %</td><td>Area=17.96 m2</td></tr>
<tr><td>BCM=0.126</td><td>Type: upstream</td></tr>
</table>]]></description><Point>
<coordinates>67.262435,61.426302,0</coordinates>
</Point>
</Placemark>
<Placemark>
<Style id="highlightPlacemark229">
<IconStyle>
<scale>0.75</scale>
<Icon>
<href>http://maps.google.com/mapfiles/ms/micons/red.png</href>
</Icon>
</IconStyle>
<LabelStyle>
<scale>0</scale>
</LabelStyle>
</Style>
<name>Rank 229</name>
<description><![CDATA[  <table width="500">
<tr><td>Country: <b>RUS</b></td><td>Flare ID: <b>vnfdb_2012_10602</b></td></tr>
<tr><td colspan="2">Combustion parameters:</td></tr>
<tr><td>Lat=61.882679, Lon=75.724171 deg.</td><td>Tavg=1738.53 K, RHsum=4.58089 MW</td></tr>
<tr><td>Freq. detect.=86.02 %</td><td>Area=30.30 m2</td></tr>
<tr><td>BCM=0.126</td><td>Type: upstream</td></tr>
</table>]]></description><Point>
<coordinates>75.724171,61.882679,0</coordinates>
</Point>
</Placemark>
<Placemark>
<Style id="highlightPlacemark230">
<IconStyle>
<scale>0.75</scale>
<Icon>
<href>http://maps.google.com/mapfiles/ms/micons/red.png</href>
</Icon>
</IconStyle>
<LabelStyle>
<scale>0</scale>
</LabelStyle>
</Style>
<name>Rank 230</name>
<description><![CDATA[  <table width="500">
<tr><td>Country: <b>OMN</b></td><td>Flare ID: <b>vnfdb_2012_09390</b></td></tr>
<tr><td colspan="2">Combustion parameters:</td></tr>
<tr><td>Lat=18.320867, Lon=55.103794 deg.</td><td>Tavg=1726.31 K, RHsum=4.57117 MW</td></tr>
<tr><td>Freq. detect.=95.58 %</td><td>Area=21.92 m2</td></tr>
<tr><td>BCM=0.125</td><td>Type: upstream</td></tr>
</table>]]></description><Point>
<coordinates>55.103794,18.320867,0</coordinates>
</Point>
</Placemark>
<Placemark>
<Style id="highlightPlacemark231">
<IconStyle>
<scale>0.75</scale>
<Icon>
<href>http://maps.google.com/mapfiles/ms/micons/red.png</href>
</Icon>
</IconStyle>
<LabelStyle>
<scale>0</scale>
</LabelStyle>
</Style>
<name>Rank 231</name>
<description><![CDATA[  <table width="500">
<tr><td>Country: <b>RUS</b></td><td>Flare ID: <b>vnfdb_2012_10920</b></td></tr>
<tr><td colspan="2">Combustion parameters:</td></tr>
<tr><td>Lat=58.155840, Lon=78.903743 deg.</td><td>Tavg=1778.72 K, RHsum=4.56557 MW</td></tr>
<tr><td>Freq. detect.=85.91 %</td><td>Area=24.11 m2</td></tr>
<tr><td>BCM=0.125</td><td>Type: upstream</td></tr>
</table>]]></description><Point>
<coordinates>78.903743,58.155840,0</coordinates>
</Point>
</Placemark>
<Placemark>
<Style id="highlightPlacemark232">
<IconStyle>
<scale>0.75</scale>
<Icon>
<href>http://maps.google.com/mapfiles/ms/micons/red.png</href>
</Icon>
</IconStyle>
<LabelStyle>
<scale>0</scale>
</LabelStyle>
</Style>
<name>Rank 232</name>
<description><![CDATA[  <table width="500">
<tr><td>Country: <b>LBY</b></td><td>Flare ID: <b>vnfdb_2012_08135</b></td></tr>
<tr><td colspan="2">Combustion parameters:</td></tr>
<tr><td>Lat=26.701481, Lon=12.451744 deg.</td><td>Tavg=1652.87 K, RHsum=4.55916 MW</td></tr>
<tr><td>Freq. detect.=92.99 %</td><td>Area=25.56 m2</td></tr>
<tr><td>BCM=0.125</td><td>Type: upstream</td></tr>
</table>]]></description><Point>
<coordinates>12.451744,26.701481,0</coordinates>
</Point>
</Placemark>
<Placemark>
<Style id="highlightPlacemark233">
<IconStyle>
<scale>0.75</scale>
<Icon>
<href>http://maps.google.com/mapfiles/ms/micons/red.png</href>
</Icon>
</IconStyle>
<LabelStyle>
<scale>0</scale>
</LabelStyle>
</Style>
<name>Rank 233</name>
<description><![CDATA[  <table width="500">
<tr><td>Country: <b>SAU</b></td><td>Flare ID: <b>vnfdb_2012_08764</b></td></tr>
<tr><td colspan="2">Combustion parameters:</td></tr>
<tr><td>Lat=28.456415, Lon=47.874158 deg.</td><td>Tavg=1765.62 K, RHsum=4.55372 MW</td></tr>
<tr><td>Freq. detect.=95.92 %</td><td>Area=16.90 m2</td></tr>
<tr><td>BCM=0.125</td><td>Type: upstream</td></tr>
</table>]]></description><Point>
<coordinates>47.874158,28.456415,0</coordinates>
</Point>
</Placemark>
<Placemark>
<Style id="highlightPlacemark234">
<IconStyle>
<scale>0.75</scale>
<Icon>
<href>http://maps.google.com/mapfiles/ms/micons/red.png</href>
</Icon>
</IconStyle>
<LabelStyle>
<scale>0</scale>
</LabelStyle>
</Style>
<name>Rank 234</name>
<description><![CDATA[  <table width="500">
<tr><td>Country: <b>IRQ</b></td><td>Flare ID: <b>vnfdb_2012_08581</b></td></tr>
<tr><td colspan="2">Combustion parameters:</td></tr>
<tr><td>Lat=35.662951, Lon=43.964857 deg.</td><td>Tavg=1722.09 K, RHsum=4.5533 MW</td></tr>
<tr><td>Freq. detect.=96.94 %</td><td>Area=20.72 m2</td></tr>
<tr><td>BCM=0.125</td><td>Type: upstream</td></tr>
</table>]]></description><Point>
<coordinates>43.964857,35.662951,0</coordinates>
</Point>
</Placemark>
<Placemark>
<Style id="highlightPlacemark235">
<IconStyle>
<scale>0.75</scale>
<Icon>
<href>http://maps.google.com/mapfiles/ms/micons/red.png</href>
</Icon>
</IconStyle>
<LabelStyle>
<scale>0</scale>
</LabelStyle>
</Style>
<name>Rank 235</name>
<description><![CDATA[  <table width="500">
<tr><td>Country: <b>AGO</b></td><td>Flare ID: <b>vnfdb_2012_09854</b></td></tr>
<tr><td colspan="2">Combustion parameters:</td></tr>
<tr><td>Lat=-7.649994, Lon=11.680423 deg.</td><td>Tavg=1629.57 K, RHsum=4.54866 MW</td></tr>
<tr><td>Freq. detect.=82.60 %</td><td>Area=41.23 m2</td></tr>
<tr><td>BCM=0.125</td><td>Type: upstream</td></tr>
</table>]]></description><Point>
<coordinates>11.680423,-7.649994,0</coordinates>
</Point>
</Placemark>
<Placemark>
<Style id="highlightPlacemark236">
<IconStyle>
<scale>0.75</scale>
<Icon>
<href>http://maps.google.com/mapfiles/ms/micons/red.png</href>
</Icon>
</IconStyle>
<LabelStyle>
<scale>0</scale>
</LabelStyle>
</Style>
<name>Rank 236</name>
<description><![CDATA[  <table width="500">
<tr><td>Country: <b>RUS</b></td><td>Flare ID: <b>vnfdb_2012_10805</b></td></tr>
<tr><td colspan="2">Combustion parameters:</td></tr>
<tr><td>Lat=65.906178, Lon=77.241231 deg.</td><td>Tavg=1711.03 K, RHsum=4.54654 MW</td></tr>
<tr><td>Freq. detect.=89.35 %</td><td>Area=24.50 m2</td></tr>
<tr><td>BCM=0.125</td><td>Type: upstream</td></tr>
</table>]]></description><Point>
<coordinates>77.241231,65.906178,0</coordinates>
</Point>
</Placemark>
<Placemark>
<Style id="highlightPlacemark237">
<IconStyle>
<scale>0.75</scale>
<Icon>
<href>http://maps.google.com/mapfiles/ms/micons/red.png</href>
</Icon>
</IconStyle>
<LabelStyle>
<scale>0</scale>
</LabelStyle>
</Style>
<name>Rank 237</name>
<description><![CDATA[  <table width="500">
<tr><td>Country: <b>RUS</b></td><td>Flare ID: <b>vnfdb_2012_10866</b></td></tr>
<tr><td colspan="2">Combustion parameters:</td></tr>
<tr><td>Lat=62.412197, Lon=78.158316 deg.</td><td>Tavg=1778.4 K, RHsum=4.54263 MW</td></tr>
<tr><td>Freq. detect.=86.14 %</td><td>Area=19.04 m2</td></tr>
<tr><td>BCM=0.124</td><td>Type: upstream</td></tr>
</table>]]></description><Point>
<coordinates>78.158316,62.412197,0</coordinates>
</Point>
</Placemark>
<Placemark>
<Style id="highlightPlacemark238">
<IconStyle>
<scale>0.75</scale>
<Icon>
<href>http://maps.google.com/mapfiles/ms/micons/red.png</href>
</Icon>
</IconStyle>
<LabelStyle>
<scale>0</scale>
</LabelStyle>
</Style>
<name>Rank 238</name>
<description><![CDATA[  <table width="500">
<tr><td>Country: <b>OMN</b></td><td>Flare ID: <b>vnfdb_2012_09380</b></td></tr>
<tr><td colspan="2">Combustion parameters:</td></tr>
<tr><td>Lat=18.013838, Lon=54.571847 deg.</td><td>Tavg=1717.43 K, RHsum=4.54226 MW</td></tr>
<tr><td>Freq. detect.=82.53 %</td><td>Area=23.57 m2</td></tr>
<tr><td>BCM=0.124</td><td>Type: upstream</td></tr>
</table>]]></description><Point>
<coordinates>54.571847,18.013838,0</coordinates>
</Point>
</Placemark>
<Placemark>
<Style id="highlightPlacemark239">
<IconStyle>
<scale>0.75</scale>
<Icon>
<href>http://maps.google.com/mapfiles/ms/micons/red.png</href>
</Icon>
</IconStyle>
<LabelStyle>
<scale>0</scale>
</LabelStyle>
</Style>
<name>Rank 239</name>
<description><![CDATA[  <table width="500">
<tr><td>Country: <b>VEN</b></td><td>Flare ID: <b>vnfdb_2012_05940</b></td></tr>
<tr><td colspan="2">Combustion parameters:</td></tr>
<tr><td>Lat=9.232786, Lon=-64.303279 deg.</td><td>Tavg=1638.68 K, RHsum=4.53089 MW</td></tr>
<tr><td>Freq. detect.=55.81 %</td><td>Area=56.31 m2</td></tr>
<tr><td>BCM=0.124</td><td>Type: upstream</td></tr>
</table>]]></description><Point>
<coordinates>-64.303279,9.232786,0</coordinates>
</Point>
</Placemark>
<Placemark>
<Style id="highlightPlacemark240">
<IconStyle>
<scale>0.75</scale>
<Icon>
<href>http://maps.google.com/mapfiles/ms/micons/red.png</href>
</Icon>
</IconStyle>
<LabelStyle>
<scale>0</scale>
</LabelStyle>
</Style>
<name>Rank 240</name>
<description><![CDATA[  <table width="500">
<tr><td>Country: <b>NGA</b></td><td>Flare ID: <b>vnfdb_2012_07794</b></td></tr>
<tr><td colspan="2">Combustion parameters:</td></tr>
<tr><td>Lat=5.817784, Lon=5.200166 deg.</td><td>Tavg=1759.5 K, RHsum=4.51949 MW</td></tr>
<tr><td>Freq. detect.=93.98 %</td><td>Area=19.59 m2</td></tr>
<tr><td>BCM=0.124</td><td>Type: upstream</td></tr>
</table>]]></description><Point>
<coordinates>5.200166,5.817784,0</coordinates>
</Point>
</Placemark>
<Placemark>
<Style id="highlightPlacemark241">
<IconStyle>
<scale>0.75</scale>
<Icon>
<href>http://maps.google.com/mapfiles/ms/micons/red.png</href>
</Icon>
</IconStyle>
<LabelStyle>
<scale>0</scale>
</LabelStyle>
</Style>
<name>Rank 241</name>
<description><![CDATA[  <table width="500">
<tr><td>Country: <b>SAU</b></td><td>Flare ID: <b>vnfdb_2012_09007</b></td></tr>
<tr><td colspan="2">Combustion parameters:</td></tr>
<tr><td>Lat=25.639014, Lon=49.392143 deg.</td><td>Tavg=1622.55 K, RHsum=4.51402 MW</td></tr>
<tr><td>Freq. detect.=97.82 %</td><td>Area=35.25 m2</td></tr>
<tr><td>BCM=0.124</td><td>Type: upstream</td></tr>
</table>]]></description><Point>
<coordinates>49.392143,25.639014,0</coordinates>
</Point>
</Placemark>
<Placemark>
<Style id="highlightPlacemark242">
<IconStyle>
<scale>0.75</scale>
<Icon>
<href>http://maps.google.com/mapfiles/ms/micons/red.png</href>
</Icon>
</IconStyle>
<LabelStyle>
<scale>0</scale>
</LabelStyle>
</Style>
<name>Rank 242</name>
<description><![CDATA[  <table width="500">
<tr><td>Country: <b>KAZ</b></td><td>Flare ID: <b>vnfdb_2012_10266</b></td></tr>
<tr><td colspan="2">Combustion parameters:</td></tr>
<tr><td>Lat=45.950488, Lon=65.724139 deg.</td><td>Tavg=1675.9 K, RHsum=4.51228 MW</td></tr>
<tr><td>Freq. detect.=94.35 %</td><td>Area=29.47 m2</td></tr>
<tr><td>BCM=0.124</td><td>Type: upstream</td></tr>
</table>]]></description><Point>
<coordinates>65.724139,45.950488,0</coordinates>
</Point>
</Placemark>
<Placemark>
<Style id="highlightPlacemark243">
<IconStyle>
<scale>0.75</scale>
<Icon>
<href>http://maps.google.com/mapfiles/ms/micons/red.png</href>
</Icon>
</IconStyle>
<LabelStyle>
<scale>0</scale>
</LabelStyle>
</Style>
<name>Rank 243</name>
<description><![CDATA[  <table width="500">
<tr><td>Country: <b>LBY</b></td><td>Flare ID: <b>vnfdb_2012_08223</b></td></tr>
<tr><td colspan="2">Combustion parameters:</td></tr>
<tr><td>Lat=28.871248, Lon=21.220735 deg.</td><td>Tavg=1721.47 K, RHsum=4.50374 MW</td></tr>
<tr><td>Freq. detect.=94.41 %</td><td>Area=19.48 m2</td></tr>
<tr><td>BCM=0.123</td><td>Type: upstream</td></tr>
</table>]]></description><Point>
<coordinates>21.220735,28.871248,0</coordinates>
</Point>
</Placemark>
<Placemark>
<Style id="highlightPlacemark244">
<IconStyle>
<scale>0.75</scale>
<Icon>
<href>http://maps.google.com/mapfiles/kml/shapes/firedept.png</href>
</Icon>
</IconStyle>
<LabelStyle>
<scale>0</scale>
</LabelStyle>
</Style>
<name>Rank 244</name>
<description><![CDATA[  <table width="500">
<tr><td>Country: <b>LBY</b></td><td>Flare ID: <b>vnfdb_2012_08189</b></td></tr>
<tr><td colspan="2">Combustion parameters:</td></tr>
<tr><td>Lat=30.408142, Lon=19.595318 deg.</td><td>Tavg=1594.8 K, RHsum=4.48671 MW</td></tr>
<tr><td>Freq. detect.=96.96 %</td><td>Area=33.09 m2</td></tr>
<tr><td>BCM=0.123</td><td>Type: LNG</td></tr>
</table>]]></description><Point>
<coordinates>19.595318,30.408142,0</coordinates>
</Point>
</Placemark>
<Placemark>
<Style id="highlightPlacemark245">
<IconStyle>
<scale>0.75</scale>
<Icon>
<href>http://maps.google.com/mapfiles/ms/micons/red.png</href>
</Icon>
</IconStyle>
<LabelStyle>
<scale>0</scale>
</LabelStyle>
</Style>
<name>Rank 245</name>
<description><![CDATA[  <table width="500">
<tr><td>Country: <b>IRN</b></td><td>Flare ID: <b>vnfdb_2012_09168</b></td></tr>
<tr><td colspan="2">Combustion parameters:</td></tr>
<tr><td>Lat=30.302069, Lon=50.731513 deg.</td><td>Tavg=1666.47 K, RHsum=4.48167 MW</td></tr>
<tr><td>Freq. detect.=96.91 %</td><td>Area=26.64 m2</td></tr>
<tr><td>BCM=0.123</td><td>Type: upstream</td></tr>
</table>]]></description><Point>
<coordinates>50.731513,30.302069,0</coordinates>
</Point>
</Placemark>
<Placemark>
<Style id="highlightPlacemark246">
<IconStyle>
<scale>0.75</scale>
<Icon>
<href>http://maps.google.com/mapfiles/ms/micons/red.png</href>
</Icon>
</IconStyle>
<LabelStyle>
<scale>0</scale>
</LabelStyle>
</Style>
<name>Rank 246</name>
<description><![CDATA[  <table width="500">
<tr><td>Country: <b>NGA</b></td><td>Flare ID: <b>vnfdb_2012_09730</b></td></tr>
<tr><td colspan="2">Combustion parameters:</td></tr>
<tr><td>Lat=4.317110, Lon=8.366237 deg.</td><td>Tavg=1771.28 K, RHsum=4.46187 MW</td></tr>
<tr><td>Freq. detect.=98.00 %</td><td>Area=19.01 m2</td></tr>
<tr><td>BCM=0.122</td><td>Type: upstream</td></tr>
</table>]]></description><Point>
<coordinates>8.366237,4.317110,0</coordinates>
</Point>
</Placemark>
<Placemark>
<Style id="highlightPlacemark247">
<IconStyle>
<scale>0.75</scale>
<Icon>
<href>http://maps.google.com/mapfiles/ms/micons/red.png</href>
</Icon>
</IconStyle>
<LabelStyle>
<scale>0</scale>
</LabelStyle>
</Style>
<name>Rank 247</name>
<description><![CDATA[  <table width="500">
<tr><td>Country: <b>RUS</b></td><td>Flare ID: <b>vnfdb_2012_07401</b></td></tr>
<tr><td colspan="2">Combustion parameters:</td></tr>
<tr><td>Lat=52.604071, Lon=53.212198 deg.</td><td>Tavg=1708.09 K, RHsum=4.45729 MW</td></tr>
<tr><td>Freq. detect.=89.97 %</td><td>Area=24.20 m2</td></tr>
<tr><td>BCM=0.122</td><td>Type: upstream</td></tr>
</table>]]></description><Point>
<coordinates>53.212198,52.604071,0</coordinates>
</Point>
</Placemark>
<Placemark>
<Style id="highlightPlacemark248">
<IconStyle>
<scale>0.75</scale>
<Icon>
<href>http://maps.google.com/mapfiles/ms/micons/red.png</href>
</Icon>
</IconStyle>
<LabelStyle>
<scale>0</scale>
</LabelStyle>
</Style>
<name>Rank 248</name>
<description><![CDATA[  <table width="500">
<tr><td>Country: <b>COG</b></td><td>Flare ID: <b>vnfdb_2012_09846</b></td></tr>
<tr><td colspan="2">Combustion parameters:</td></tr>
<tr><td>Lat=-5.271749, Lon=11.564863 deg.</td><td>Tavg=1577.23 K, RHsum=4.43465 MW</td></tr>
<tr><td>Freq. detect.=95.67 %</td><td>Area=42.54 m2</td></tr>
<tr><td>BCM=0.122</td><td>Type: upstream</td></tr>
</table>]]></description><Point>
<coordinates>11.564863,-5.271749,0</coordinates>
</Point>
</Placemark>
<Placemark>
<Style id="highlightPlacemark249">
<IconStyle>
<scale>0.75</scale>
<Icon>
<href>http://maps.google.com/mapfiles/ms/micons/red.png</href>
</Icon>
</IconStyle>
<LabelStyle>
<scale>0</scale>
</LabelStyle>
</Style>
<name>Rank 249</name>
<description><![CDATA[  <table width="500">
<tr><td>Country: <b>IRQ</b></td><td>Flare ID: <b>vnfdb_2012_08698</b></td></tr>
<tr><td colspan="2">Combustion parameters:</td></tr>
<tr><td>Lat=32.120740, Lon=47.405288 deg.</td><td>Tavg=1707.49 K, RHsum=4.43001 MW</td></tr>
<tr><td>Freq. detect.=93.55 %</td><td>Area=22.79 m2</td></tr>
<tr><td>BCM=0.121</td><td>Type: upstream</td></tr>
</table>]]></description><Point>
<coordinates>47.405288,32.120740,0</coordinates>
</Point>
</Placemark>
<Placemark>
<Style id="highlightPlacemark250">
<IconStyle>
<scale>0.75</scale>
<Icon>
<href>http://maps.google.com/mapfiles/ms/micons/red.png</href>
</Icon>
</IconStyle>
<LabelStyle>
<scale>0</scale>
</LabelStyle>
</Style>
<name>Rank 250</name>
<description><![CDATA[  <table width="500">
<tr><td>Country: <b>TKM</b></td><td>Flare ID: <b>vnfdb_2012_09264</b></td></tr>
<tr><td colspan="2">Combustion parameters:</td></tr>
<tr><td>Lat=39.675096, Lon=52.269401 deg.</td><td>Tavg=1802.46 K, RHsum=4.42388 MW</td></tr>
<tr><td>Freq. detect.=91.00 %</td><td>Area=14.10 m2</td></tr>
<tr><td>BCM=0.121</td><td>Type: upstream</td></tr>
</table>]]></description><Point>
<coordinates>52.269401,39.675096,0</coordinates>
</Point>
</Placemark>
<Placemark>
<Style id="highlightPlacemark251">
<IconStyle>
<scale>0.75</scale>
<Icon>
<href>http://maps.google.com/mapfiles/ms/micons/red.png</href>
</Icon>
</IconStyle>
<LabelStyle>
<scale>0</scale>
</LabelStyle>
</Style>
<name>Rank 251</name>
<description><![CDATA[  <table width="500">
<tr><td>Country: <b>DZA</b></td><td>Flare ID: <b>vnfdb_2012_07801</b></td></tr>
<tr><td colspan="2">Combustion parameters:</td></tr>
<tr><td>Lat=31.961910, Lon=5.215706 deg.</td><td>Tavg=1605.57 K, RHsum=4.3934 MW</td></tr>
<tr><td>Freq. detect.=94.36 %</td><td>Area=27.96 m2</td></tr>
<tr><td>BCM=0.12</td><td>Type: upstream</td></tr>
</table>]]></description><Point>
<coordinates>5.215706,31.961910,0</coordinates>
</Point>
</Placemark>
<Placemark>
<Style id="highlightPlacemark252">
<IconStyle>
<scale>0.75</scale>
<Icon>
<href>http://maps.google.com/mapfiles/ms/micons/red.png</href>
</Icon>
</IconStyle>
<LabelStyle>
<scale>0</scale>
</LabelStyle>
</Style>
<name>Rank 252</name>
<description><![CDATA[  <table width="500">
<tr><td>Country: <b>IRN</b></td><td>Flare ID: <b>vnfdb_2012_09119</b></td></tr>
<tr><td colspan="2">Combustion parameters:</td></tr>
<tr><td>Lat=30.110213, Lon=50.354658 deg.</td><td>Tavg=1638.97 K, RHsum=4.38409 MW</td></tr>
<tr><td>Freq. detect.=78.14 %</td><td>Area=35.70 m2</td></tr>
<tr><td>BCM=0.12</td><td>Type: upstream</td></tr>
</table>]]></description><Point>
<coordinates>50.354658,30.110213,0</coordinates>
</Point>
</Placemark>
<Placemark>
<Style id="highlightPlacemark253">
<IconStyle>
<scale>0.75</scale>
<Icon>
<href>http://maps.google.com/mapfiles/ms/micons/red.png</href>
</Icon>
</IconStyle>
<LabelStyle>
<scale>0</scale>
</LabelStyle>
</Style>
<name>Rank 253</name>
<description><![CDATA[  <table width="500">
<tr><td>Country: <b>DZA</b></td><td>Flare ID: <b>vnfdb_2012_07705</b></td></tr>
<tr><td colspan="2">Combustion parameters:</td></tr>
<tr><td>Lat=32.935448, Lon=3.236125 deg.</td><td>Tavg=1653.88 K, RHsum=4.36456 MW</td></tr>
<tr><td>Freq. detect.=99.09 %</td><td>Area=25.19 m2</td></tr>
<tr><td>BCM=0.12</td><td>Type: upstream</td></tr>
</table>]]></description><Point>
<coordinates>3.236125,32.935448,0</coordinates>
</Point>
</Placemark>
<Placemark>
<Style id="highlightPlacemark254">
<IconStyle>
<scale>0.75</scale>
<Icon>
<href>http://maps.google.com/mapfiles/ms/micons/red.png</href>
</Icon>
</IconStyle>
<LabelStyle>
<scale>0</scale>
</LabelStyle>
</Style>
<name>Rank 254</name>
<description><![CDATA[  <table width="500">
<tr><td>Country: <b>KWT</b></td><td>Flare ID: <b>vnfdb_2012_08775</b></td></tr>
<tr><td colspan="2">Combustion parameters:</td></tr>
<tr><td>Lat=28.578886, Lon=47.918074 deg.</td><td>Tavg=1793.74 K, RHsum=4.35921 MW</td></tr>
<tr><td>Freq. detect.=95.85 %</td><td>Area=14.53 m2</td></tr>
<tr><td>BCM=0.119</td><td>Type: upstream</td></tr>
</table>]]></description><Point>
<coordinates>47.918074,28.578886,0</coordinates>
</Point>
</Placemark>
<Placemark>
<Style id="highlightPlacemark255">
<IconStyle>
<scale>0.75</scale>
<Icon>
<href>http://maps.google.com/mapfiles/ms/micons/red.png</href>
</Icon>
</IconStyle>
<LabelStyle>
<scale>0</scale>
</LabelStyle>
</Style>
<name>Rank 255</name>
<description><![CDATA[  <table width="500">
<tr><td>Country: <b>RUS</b></td><td>Flare ID: <b>vnfdb_2012_07465</b></td></tr>
<tr><td colspan="2">Combustion parameters:</td></tr>
<tr><td>Lat=52.278502, Lon=54.449233 deg.</td><td>Tavg=1726.98 K, RHsum=4.34628 MW</td></tr>
<tr><td>Freq. detect.=88.92 %</td><td>Area=22.64 m2</td></tr>
<tr><td>BCM=0.119</td><td>Type: upstream</td></tr>
</table>]]></description><Point>
<coordinates>54.449233,52.278502,0</coordinates>
</Point>
</Placemark>
<Placemark>
<Style id="highlightPlacemark256">
<IconStyle>
<scale>0.75</scale>
<Icon>
<href>http://maps.google.com/mapfiles/kml/shapes/firedept.png</href>
</Icon>
</IconStyle>
<LabelStyle>
<scale>0</scale>
</LabelStyle>
</Style>
<name>Rank 256</name>
<description><![CDATA[  <table width="500">
<tr><td>Country: <b>TTO</b></td><td>Flare ID: <b>vnfdb_2012_06022</b></td></tr>
<tr><td colspan="2">Combustion parameters:</td></tr>
<tr><td>Lat=10.182940, Lon=-61.697684 deg.</td><td>Tavg=1565.76 K, RHsum=4.32746 MW</td></tr>
<tr><td>Freq. detect.=98.24 %</td><td>Area=28.66 m2</td></tr>
<tr><td>BCM=0.119</td><td>Type: LNG</td></tr>
</table>]]></description><Point>
<coordinates>-61.697684,10.182940,0</coordinates>
</Point>
</Placemark>
<Placemark>
<Style id="highlightPlacemark257">
<IconStyle>
<scale>0.75</scale>
<Icon>
<href>http://maps.google.com/mapfiles/ms/micons/red.png</href>
</Icon>
</IconStyle>
<LabelStyle>
<scale>0</scale>
</LabelStyle>
</Style>
<name>Rank 257</name>
<description><![CDATA[  <table width="500">
<tr><td>Country: <b>IRN</b></td><td>Flare ID: <b>vnfdb_2012_09084</b></td></tr>
<tr><td colspan="2">Combustion parameters:</td></tr>
<tr><td>Lat=30.572813, Lon=49.916526 deg.</td><td>Tavg=1629.98 K, RHsum=4.32622 MW</td></tr>
<tr><td>Freq. detect.=95.25 %</td><td>Area=32.56 m2</td></tr>
<tr><td>BCM=0.119</td><td>Type: upstream</td></tr>
</table>]]></description><Point>
<coordinates>49.916526,30.572813,0</coordinates>
</Point>
</Placemark>
<Placemark>
<Style id="highlightPlacemark258">
<IconStyle>
<scale>0.75</scale>
<Icon>
<href>http://maps.google.com/mapfiles/ms/micons/red.png</href>
</Icon>
</IconStyle>
<LabelStyle>
<scale>0</scale>
</LabelStyle>
</Style>
<name>Rank 258</name>
<description><![CDATA[  <table width="500">
<tr><td>Country: <b>DZA</b></td><td>Flare ID: <b>vnfdb_2012_08049</b></td></tr>
<tr><td colspan="2">Combustion parameters:</td></tr>
<tr><td>Lat=27.764638, Lon=9.192321 deg.</td><td>Tavg=1645.6 K, RHsum=4.31212 MW</td></tr>
<tr><td>Freq. detect.=98.80 %</td><td>Area=24.64 m2</td></tr>
<tr><td>BCM=0.118</td><td>Type: upstream</td></tr>
</table>]]></description><Point>
<coordinates>9.192321,27.764638,0</coordinates>
</Point>
</Placemark>
<Placemark>
<Style id="highlightPlacemark259">
<IconStyle>
<scale>0.75</scale>
<Icon>
<href>http://maps.google.com/mapfiles/ms/micons/red.png</href>
</Icon>
</IconStyle>
<LabelStyle>
<scale>0</scale>
</LabelStyle>
</Style>
<name>Rank 259</name>
<description><![CDATA[  <table width="500">
<tr><td>Country: <b>VEN</b></td><td>Flare ID: <b>vnfdb_2012_05997</b></td></tr>
<tr><td colspan="2">Combustion parameters:</td></tr>
<tr><td>Lat=9.742673, Lon=-63.431647 deg.</td><td>Tavg=1845.96 K, RHsum=4.29182 MW</td></tr>
<tr><td>Freq. detect.=97.11 %</td><td>Area=13.16 m2</td></tr>
<tr><td>BCM=0.118</td><td>Type: upstream</td></tr>
</table>]]></description><Point>
<coordinates>-63.431647,9.742673,0</coordinates>
</Point>
</Placemark>
<Placemark>
<Style id="highlightPlacemark260">
<IconStyle>
<scale>0.75</scale>
<Icon>
<href>http://maps.google.com/mapfiles/kml/shapes/gas_stations.png</href>
</Icon>
</IconStyle>
<LabelStyle>
<scale>0</scale>
</LabelStyle>
</Style>
<name>Rank 260</name>
<description><![CDATA[  <table width="500">
<tr><td>Country: <b>DZA</b></td><td>Flare ID: <b>vnfdb_2012_07990</b></td></tr>
<tr><td colspan="2">Combustion parameters:</td></tr>
<tr><td>Lat=36.869577, Lon=6.981267 deg.</td><td>Tavg=1580.97 K, RHsum=4.29112 MW</td></tr>
<tr><td>Freq. detect.=93.45 %</td><td>Area=37.95 m2</td></tr>
<tr><td>BCM=0.118</td><td>Type: downstream</td></tr>
</table>]]></description><Point>
<coordinates>6.981267,36.869577,0</coordinates>
</Point>
</Placemark>
<Placemark>
<Style id="highlightPlacemark261">
<IconStyle>
<scale>0.75</scale>
<Icon>
<href>http://maps.google.com/mapfiles/ms/micons/red.png</href>
</Icon>
</IconStyle>
<LabelStyle>
<scale>0</scale>
</LabelStyle>
</Style>
<name>Rank 261</name>
<description><![CDATA[  <table width="500">
<tr><td>Country: <b>VEN</b></td><td>Flare ID: <b>vnfdb_2012_06009</b></td></tr>
<tr><td colspan="2">Combustion parameters:</td></tr>
<tr><td>Lat=8.662256, Lon=-63.006000 deg.</td><td>Tavg=1807.76 K, RHsum=4.29091 MW</td></tr>
<tr><td>Freq. detect.=99.33 %</td><td>Area=12.96 m2</td></tr>
<tr><td>BCM=0.118</td><td>Type: upstream</td></tr>
</table>]]></description><Point>
<coordinates>-63.006000,8.662256,0</coordinates>
</Point>
</Placemark>
<Placemark>
<Style id="highlightPlacemark262">
<IconStyle>
<scale>0.75</scale>
<Icon>
<href>http://maps.google.com/mapfiles/ms/micons/red.png</href>
</Icon>
</IconStyle>
<LabelStyle>
<scale>0</scale>
</LabelStyle>
</Style>
<name>Rank 262</name>
<description><![CDATA[  <table width="500">
<tr><td>Country: <b>IRN</b></td><td>Flare ID: <b>vnfdb_2012_09037</b></td></tr>
<tr><td colspan="2">Combustion parameters:</td></tr>
<tr><td>Lat=30.710226, Lon=49.538719 deg.</td><td>Tavg=1729.26 K, RHsum=4.28187 MW</td></tr>
<tr><td>Freq. detect.=96.48 %</td><td>Area=19.31 m2</td></tr>
<tr><td>BCM=0.117</td><td>Type: upstream</td></tr>
</table>]]></description><Point>
<coordinates>49.538719,30.710226,0</coordinates>
</Point>
</Placemark>
<Placemark>
<Style id="highlightPlacemark263">
<IconStyle>
<scale>0.75</scale>
<Icon>
<href>http://maps.google.com/mapfiles/ms/micons/red.png</href>
</Icon>
</IconStyle>
<LabelStyle>
<scale>0</scale>
</LabelStyle>
</Style>
<name>Rank 263</name>
<description><![CDATA[  <table width="500">
<tr><td>Country: <b>MYS</b></td><td>Flare ID: <b>vnfdb_2012_12316</b></td></tr>
<tr><td colspan="2">Combustion parameters:</td></tr>
<tr><td>Lat=6.618359, Lon=115.789830 deg.</td><td>Tavg=1638.95 K, RHsum=4.2778 MW</td></tr>
<tr><td>Freq. detect.=93.29 %</td><td>Area=26.25 m2</td></tr>
<tr><td>BCM=0.117</td><td>Type: upstream</td></tr>
</table>]]></description><Point>
<coordinates>115.789830,6.618359,0</coordinates>
</Point>
</Placemark>
<Placemark>
<Style id="highlightPlacemark264">
<IconStyle>
<scale>0.75</scale>
<Icon>
<href>http://maps.google.com/mapfiles/ms/micons/red.png</href>
</Icon>
</IconStyle>
<LabelStyle>
<scale>0</scale>
</LabelStyle>
</Style>
<name>Rank 264</name>
<description><![CDATA[  <table width="500">
<tr><td>Country: <b>RUS</b></td><td>Flare ID: <b>vnfdb_2012_10986</b></td></tr>
<tr><td colspan="2">Combustion parameters:</td></tr>
<tr><td>Lat=63.448279, Lon=80.976050 deg.</td><td>Tavg=1730.22 K, RHsum=4.27166 MW</td></tr>
<tr><td>Freq. detect.=81.78 %</td><td>Area=20.00 m2</td></tr>
<tr><td>BCM=0.117</td><td>Type: upstream</td></tr>
</table>]]></description><Point>
<coordinates>80.976050,63.448279,0</coordinates>
</Point>
</Placemark>
<Placemark>
<Style id="highlightPlacemark265">
<IconStyle>
<scale>0.75</scale>
<Icon>
<href>http://maps.google.com/mapfiles/ms/micons/red.png</href>
</Icon>
</IconStyle>
<LabelStyle>
<scale>0</scale>
</LabelStyle>
</Style>
<name>Rank 265</name>
<description><![CDATA[  <table width="500">
<tr><td>Country: <b>MEX</b></td><td>Flare ID: <b>vnfdb_2012_05616</b></td></tr>
<tr><td colspan="2">Combustion parameters:</td></tr>
<tr><td>Lat=17.896586, Lon=-92.490953 deg.</td><td>Tavg=1544.8 K, RHsum=4.23555 MW</td></tr>
<tr><td>Freq. detect.=96.02 %</td><td>Area=40.02 m2</td></tr>
<tr><td>BCM=0.116</td><td>Type: upstream</td></tr>
</table>]]></description><Point>
<coordinates>-92.490953,17.896586,0</coordinates>
</Point>
</Placemark>
<Placemark>
<Style id="highlightPlacemark266">
<IconStyle>
<scale>0.75</scale>
<Icon>
<href>http://maps.google.com/mapfiles/ms/micons/red.png</href>
</Icon>
</IconStyle>
<LabelStyle>
<scale>0</scale>
</LabelStyle>
</Style>
<name>Rank 266</name>
<description><![CDATA[  <table width="500">
<tr><td>Country: <b>GNQ</b></td><td>Flare ID: <b>vnfdb_2012_09695</b></td></tr>
<tr><td colspan="2">Combustion parameters:</td></tr>
<tr><td>Lat=3.800959, Lon=8.075703 deg.</td><td>Tavg=1635.51 K, RHsum=4.23424 MW</td></tr>
<tr><td>Freq. detect.=96.67 %</td><td>Area=28.07 m2</td></tr>
<tr><td>BCM=0.116</td><td>Type: upstream</td></tr>
</table>]]></description><Point>
<coordinates>8.075703,3.800959,0</coordinates>
</Point>
</Placemark>
<Placemark>
<Style id="highlightPlacemark267">
<IconStyle>
<scale>0.75</scale>
<Icon>
<href>http://maps.google.com/mapfiles/ms/micons/red.png</href>
</Icon>
</IconStyle>
<LabelStyle>
<scale>0</scale>
</LabelStyle>
</Style>
<name>Rank 267</name>
<description><![CDATA[  <table width="500">
<tr><td>Country: <b>IRQ</b></td><td>Flare ID: <b>vnfdb_2012_08705</b></td></tr>
<tr><td colspan="2">Combustion parameters:</td></tr>
<tr><td>Lat=32.060934, Lon=47.445921 deg.</td><td>Tavg=1667.02 K, RHsum=4.23266 MW</td></tr>
<tr><td>Freq. detect.=95.68 %</td><td>Area=24.18 m2</td></tr>
<tr><td>BCM=0.116</td><td>Type: upstream</td></tr>
</table>]]></description><Point>
<coordinates>47.445921,32.060934,0</coordinates>
</Point>
</Placemark>
<Placemark>
<Style id="highlightPlacemark268">
<IconStyle>
<scale>0.75</scale>
<Icon>
<href>http://maps.google.com/mapfiles/ms/micons/red.png</href>
</Icon>
</IconStyle>
<LabelStyle>
<scale>0</scale>
</LabelStyle>
</Style>
<name>Rank 268</name>
<description><![CDATA[  <table width="500">
<tr><td>Country: <b>DZA</b></td><td>Flare ID: <b>vnfdb_2012_08070</b></td></tr>
<tr><td colspan="2">Combustion parameters:</td></tr>
<tr><td>Lat=28.918965, Lon=9.745748 deg.</td><td>Tavg=1646.21 K, RHsum=4.22865 MW</td></tr>
<tr><td>Freq. detect.=87.23 %</td><td>Area=34.56 m2</td></tr>
<tr><td>BCM=0.116</td><td>Type: upstream</td></tr>
</table>]]></description><Point>
<coordinates>9.745748,28.918965,0</coordinates>
</Point>
</Placemark>
<Placemark>
<Style id="highlightPlacemark269">
<IconStyle>
<scale>0.75</scale>
<Icon>
<href>http://maps.google.com/mapfiles/ms/micons/red.png</href>
</Icon>
</IconStyle>
<LabelStyle>
<scale>0</scale>
</LabelStyle>
</Style>
<name>Rank 269</name>
<description><![CDATA[  <table width="500">
<tr><td>Country: <b>KAZ</b></td><td>Flare ID: <b>vnfdb_2012_07411</b></td></tr>
<tr><td colspan="2">Combustion parameters:</td></tr>
<tr><td>Lat=45.899465, Lon=53.282904 deg.</td><td>Tavg=1758.45 K, RHsum=4.22562 MW</td></tr>
<tr><td>Freq. detect.=91.33 %</td><td>Area=16.71 m2</td></tr>
<tr><td>BCM=0.116</td><td>Type: upstream</td></tr>
</table>]]></description><Point>
<coordinates>53.282904,45.899465,0</coordinates>
</Point>
</Placemark>
<Placemark>
<Style id="highlightPlacemark270">
<IconStyle>
<scale>0.75</scale>
<Icon>
<href>http://maps.google.com/mapfiles/ms/micons/red.png</href>
</Icon>
</IconStyle>
<LabelStyle>
<scale>0</scale>
</LabelStyle>
</Style>
<name>Rank 270</name>
<description><![CDATA[  <table width="500">
<tr><td>Country: <b>GAB</b></td><td>Flare ID: <b>vnfdb_2012_09810</b></td></tr>
<tr><td colspan="2">Combustion parameters:</td></tr>
<tr><td>Lat=-1.522855, Lon=9.951327 deg.</td><td>Tavg=1664.19 K, RHsum=4.22475 MW</td></tr>
<tr><td>Freq. detect.=94.90 %</td><td>Area=26.66 m2</td></tr>
<tr><td>BCM=0.116</td><td>Type: upstream</td></tr>
</table>]]></description><Point>
<coordinates>9.951327,-1.522855,0</coordinates>
</Point>
</Placemark>
<Placemark>
<Style id="highlightPlacemark271">
<IconStyle>
<scale>0.75</scale>
<Icon>
<href>http://maps.google.com/mapfiles/kml/shapes/firedept.png</href>
</Icon>
</IconStyle>
<LabelStyle>
<scale>0</scale>
</LabelStyle>
</Style>
<name>Rank 271</name>
<description><![CDATA[  <table width="500">
<tr><td>Country: <b>AUS</b></td><td>Flare ID: <b>vnfdb_2012_12697</b></td></tr>
<tr><td colspan="2">Combustion parameters:</td></tr>
<tr><td>Lat=-20.594095, Lon=116.777777 deg.</td><td>Tavg=1616.1 K, RHsum=4.19489 MW</td></tr>
<tr><td>Freq. detect.=95.46 %</td><td>Area=37.45 m2</td></tr>
<tr><td>BCM=0.115</td><td>Type: LNG</td></tr>
</table>]]></description><Point>
<coordinates>116.777777,-20.594095,0</coordinates>
</Point>
</Placemark>
<Placemark>
<Style id="highlightPlacemark272">
<IconStyle>
<scale>0.75</scale>
<Icon>
<href>http://maps.google.com/mapfiles/ms/micons/red.png</href>
</Icon>
</IconStyle>
<LabelStyle>
<scale>0</scale>
</LabelStyle>
</Style>
<name>Rank 272</name>
<description><![CDATA[  <table width="500">
<tr><td>Country: <b>COD</b></td><td>Flare ID: <b>vnfdb_2012_09888</b></td></tr>
<tr><td colspan="2">Combustion parameters:</td></tr>
<tr><td>Lat=-5.953120, Lon=12.166476 deg.</td><td>Tavg=1665.97 K, RHsum=4.19416 MW</td></tr>
<tr><td>Freq. detect.=91.39 %</td><td>Area=25.26 m2</td></tr>
<tr><td>BCM=0.115</td><td>Type: upstream</td></tr>
</table>]]></description><Point>
<coordinates>12.166476,-5.953120,0</coordinates>
</Point>
</Placemark>
<Placemark>
<Style id="highlightPlacemark273">
<IconStyle>
<scale>0.75</scale>
<Icon>
<href>http://maps.google.com/mapfiles/ms/micons/red.png</href>
</Icon>
</IconStyle>
<LabelStyle>
<scale>0</scale>
</LabelStyle>
</Style>
<name>Rank 273</name>
<description><![CDATA[  <table width="500">
<tr><td>Country: <b>NGA</b></td><td>Flare ID: <b>vnfdb_2012_07970</b></td></tr>
<tr><td colspan="2">Combustion parameters:</td></tr>
<tr><td>Lat=5.460078, Lon=6.694159 deg.</td><td>Tavg=1698.53 K, RHsum=4.19144 MW</td></tr>
<tr><td>Freq. detect.=89.83 %</td><td>Area=25.08 m2</td></tr>
<tr><td>BCM=0.115</td><td>Type: upstream</td></tr>
</table>]]></description><Point>
<coordinates>6.694159,5.460078,0</coordinates>
</Point>
</Placemark>
<Placemark>
<Style id="highlightPlacemark274">
<IconStyle>
<scale>0.75</scale>
<Icon>
<href>http://maps.google.com/mapfiles/ms/micons/red.png</href>
</Icon>
</IconStyle>
<LabelStyle>
<scale>0</scale>
</LabelStyle>
</Style>
<name>Rank 274</name>
<description><![CDATA[  <table width="500">
<tr><td>Country: <b>RUS</b></td><td>Flare ID: <b>vnfdb_2012_10589</b></td></tr>
<tr><td colspan="2">Combustion parameters:</td></tr>
<tr><td>Lat=58.071590, Lon=75.615246 deg.</td><td>Tavg=1845.3 K, RHsum=4.16327 MW</td></tr>
<tr><td>Freq. detect.=87.92 %</td><td>Area=13.81 m2</td></tr>
<tr><td>BCM=0.114</td><td>Type: upstream</td></tr>
</table>]]></description><Point>
<coordinates>75.615246,58.071590,0</coordinates>
</Point>
</Placemark>
<Placemark>
<Style id="highlightPlacemark275">
<IconStyle>
<scale>0.75</scale>
<Icon>
<href>http://maps.google.com/mapfiles/ms/micons/red.png</href>
</Icon>
</IconStyle>
<LabelStyle>
<scale>0</scale>
</LabelStyle>
</Style>
<name>Rank 275</name>
<description><![CDATA[  <table width="500">
<tr><td>Country: <b>VEN</b></td><td>Flare ID: <b>vnfdb_2012_05913</b></td></tr>
<tr><td colspan="2">Combustion parameters:</td></tr>
<tr><td>Lat=8.380981, Lon=-64.958924 deg.</td><td>Tavg=1715.44 K, RHsum=4.15008 MW</td></tr>
<tr><td>Freq. detect.=96.24 %</td><td>Area=20.60 m2</td></tr>
<tr><td>BCM=0.114</td><td>Type: upstream</td></tr>
</table>]]></description><Point>
<coordinates>-64.958924,8.380981,0</coordinates>
</Point>
</Placemark>
<Placemark>
<Style id="highlightPlacemark276">
<IconStyle>
<scale>0.75</scale>
<Icon>
<href>http://maps.google.com/mapfiles/ms/micons/red.png</href>
</Icon>
</IconStyle>
<LabelStyle>
<scale>0</scale>
</LabelStyle>
</Style>
<name>Rank 276</name>
<description><![CDATA[  <table width="500">
<tr><td>Country: <b>IRN</b></td><td>Flare ID: <b>vnfdb_2012_09152</b></td></tr>
<tr><td colspan="2">Combustion parameters:</td></tr>
<tr><td>Lat=30.396416, Lon=50.616785 deg.</td><td>Tavg=1663.03 K, RHsum=4.14778 MW</td></tr>
<tr><td>Freq. detect.=97.71 %</td><td>Area=25.54 m2</td></tr>
<tr><td>BCM=0.114</td><td>Type: upstream</td></tr>
</table>]]></description><Point>
<coordinates>50.616785,30.396416,0</coordinates>
</Point>
</Placemark>
<Placemark>
<Style id="highlightPlacemark277">
<IconStyle>
<scale>0.75</scale>
<Icon>
<href>http://maps.google.com/mapfiles/ms/micons/red.png</href>
</Icon>
</IconStyle>
<LabelStyle>
<scale>0</scale>
</LabelStyle>
</Style>
<name>Rank 277</name>
<description><![CDATA[  <table width="500">
<tr><td>Country: <b>UZB</b></td><td>Flare ID: <b>vnfdb_2012_11480</b></td></tr>
<tr><td colspan="2">Combustion parameters:</td></tr>
<tr><td>Lat=38.936401, Lon=64.799572 deg.</td><td>Tavg=1720.79 K, RHsum=4.14655 MW</td></tr>
<tr><td>Freq. detect.=95.94 %</td><td>Area=17.93 m2</td></tr>
<tr><td>BCM=0.114</td><td>Type: upstream</td></tr>
</table>]]></description><Point>
<coordinates>64.799572,38.936401,0</coordinates>
</Point>
</Placemark>
<Placemark>
<Style id="highlightPlacemark278">
<IconStyle>
<scale>0.75</scale>
<Icon>
<href>http://maps.google.com/mapfiles/kml/shapes/firedept.png</href>
</Icon>
</IconStyle>
<LabelStyle>
<scale>0</scale>
</LabelStyle>
</Style>
<name>Rank 278</name>
<description><![CDATA[  <table width="500">
<tr><td>Country: <b>ARE</b></td><td>Flare ID: <b>vnfdb_2012_09300</b></td></tr>
<tr><td colspan="2">Combustion parameters:</td></tr>
<tr><td>Lat=25.164877, Lon=52.876033 deg.</td><td>Tavg=1582.24 K, RHsum=4.12553 MW</td></tr>
<tr><td>Freq. detect.=96.24 %</td><td>Area=32.90 m2</td></tr>
<tr><td>BCM=0.113</td><td>Type: LNG</td></tr>
</table>]]></description><Point>
<coordinates>52.876033,25.164877,0</coordinates>
</Point>
</Placemark>
<Placemark>
<Style id="highlightPlacemark279">
<IconStyle>
<scale>0.75</scale>
<Icon>
<href>http://maps.google.com/mapfiles/ms/micons/red.png</href>
</Icon>
</IconStyle>
<LabelStyle>
<scale>0</scale>
</LabelStyle>
</Style>
<name>Rank 279</name>
<description><![CDATA[  <table width="500">
<tr><td>Country: <b>SAU</b></td><td>Flare ID: <b>vnfdb_2012_08867</b></td></tr>
<tr><td colspan="2">Combustion parameters:</td></tr>
<tr><td>Lat=28.480055, Lon=48.932403 deg.</td><td>Tavg=1676.17 K, RHsum=4.11451 MW</td></tr>
<tr><td>Freq. detect.=86.41 %</td><td>Area=24.62 m2</td></tr>
<tr><td>BCM=0.113</td><td>Type: upstream</td></tr>
</table>]]></description><Point>
<coordinates>48.932403,28.480055,0</coordinates>
</Point>
</Placemark>
<Placemark>
<Style id="highlightPlacemark280">
<IconStyle>
<scale>0.75</scale>
<Icon>
<href>http://maps.google.com/mapfiles/ms/micons/red.png</href>
</Icon>
</IconStyle>
<LabelStyle>
<scale>0</scale>
</LabelStyle>
</Style>
<name>Rank 280</name>
<description><![CDATA[  <table width="500">
<tr><td>Country: <b>KWT</b></td><td>Flare ID: <b>vnfdb_2012_08743</b></td></tr>
<tr><td colspan="2">Combustion parameters:</td></tr>
<tr><td>Lat=29.876172, Lon=47.724715 deg.</td><td>Tavg=1611.45 K, RHsum=4.10103 MW</td></tr>
<tr><td>Freq. detect.=76.45 %</td><td>Area=63.18 m2</td></tr>
<tr><td>BCM=0.112</td><td>Type: upstream</td></tr>
</table>]]></description><Point>
<coordinates>47.724715,29.876172,0</coordinates>
</Point>
</Placemark>
<Placemark>
<Style id="highlightPlacemark281">
<IconStyle>
<scale>0.75</scale>
<Icon>
<href>http://maps.google.com/mapfiles/ms/micons/red.png</href>
</Icon>
</IconStyle>
<LabelStyle>
<scale>0</scale>
</LabelStyle>
</Style>
<name>Rank 281</name>
<description><![CDATA[  <table width="500">
<tr><td>Country: <b>IRQ</b></td><td>Flare ID: <b>vnfdb_2012_08592</b></td></tr>
<tr><td colspan="2">Combustion parameters:</td></tr>
<tr><td>Lat=35.385160, Lon=44.216284 deg.</td><td>Tavg=1621.23 K, RHsum=4.09222 MW</td></tr>
<tr><td>Freq. detect.=96.69 %</td><td>Area=26.33 m2</td></tr>
<tr><td>BCM=0.112</td><td>Type: upstream</td></tr>
</table>]]></description><Point>
<coordinates>44.216284,35.385160,0</coordinates>
</Point>
</Placemark>
<Placemark>
<Style id="highlightPlacemark282">
<IconStyle>
<scale>0.75</scale>
<Icon>
<href>http://maps.google.com/mapfiles/ms/micons/red.png</href>
</Icon>
</IconStyle>
<LabelStyle>
<scale>0</scale>
</LabelStyle>
</Style>
<name>Rank 282</name>
<description><![CDATA[  <table width="500">
<tr><td>Country: <b>MYS</b></td><td>Flare ID: <b>vnfdb_2012_12287</b></td></tr>
<tr><td colspan="2">Combustion parameters:</td></tr>
<tr><td>Lat=5.875486, Lon=114.295538 deg.</td><td>Tavg=1614.33 K, RHsum=4.06544 MW</td></tr>
<tr><td>Freq. detect.=93.45 %</td><td>Area=24.35 m2</td></tr>
<tr><td>BCM=0.111</td><td>Type: upstream</td></tr>
</table>]]></description><Point>
<coordinates>114.295538,5.875486,0</coordinates>
</Point>
</Placemark>
<Placemark>
<Style id="highlightPlacemark283">
<IconStyle>
<scale>0.75</scale>
<Icon>
<href>http://maps.google.com/mapfiles/ms/micons/red.png</href>
</Icon>
</IconStyle>
<LabelStyle>
<scale>0</scale>
</LabelStyle>
</Style>
<name>Rank 283</name>
<description><![CDATA[  <table width="500">
<tr><td>Country: <b>RUS</b></td><td>Flare ID: <b>vnfdb_2012_10760</b></td></tr>
<tr><td colspan="2">Combustion parameters:</td></tr>
<tr><td>Lat=62.987302, Lon=76.964330 deg.</td><td>Tavg=1713.84 K, RHsum=4.06094 MW</td></tr>
<tr><td>Freq. detect.=90.10 %</td><td>Area=18.97 m2</td></tr>
<tr><td>BCM=0.111</td><td>Type: upstream</td></tr>
</table>]]></description><Point>
<coordinates>76.964330,62.987302,0</coordinates>
</Point>
</Placemark>
<Placemark>
<Style id="highlightPlacemark284">
<IconStyle>
<scale>0.75</scale>
<Icon>
<href>http://maps.google.com/mapfiles/ms/micons/red.png</href>
</Icon>
</IconStyle>
<LabelStyle>
<scale>0</scale>
</LabelStyle>
</Style>
<name>Rank 284</name>
<description><![CDATA[  <table width="500">
<tr><td>Country: <b>RUS</b></td><td>Flare ID: <b>vnfdb_2012_10890</b></td></tr>
<tr><td colspan="2">Combustion parameters:</td></tr>
<tr><td>Lat=57.610221, Lon=78.395093 deg.</td><td>Tavg=1885.87 K, RHsum=4.05855 MW</td></tr>
<tr><td>Freq. detect.=87.30 %</td><td>Area=13.71 m2</td></tr>
<tr><td>BCM=0.111</td><td>Type: upstream</td></tr>
</table>]]></description><Point>
<coordinates>78.395093,57.610221,0</coordinates>
</Point>
</Placemark>
<Placemark>
<Style id="highlightPlacemark285">
<IconStyle>
<scale>0.75</scale>
<Icon>
<href>http://maps.google.com/mapfiles/ms/micons/red.png</href>
</Icon>
</IconStyle>
<LabelStyle>
<scale>0</scale>
</LabelStyle>
</Style>
<name>Rank 285</name>
<description><![CDATA[  <table width="500">
<tr><td>Country: <b>IRN</b></td><td>Flare ID: <b>vnfdb_2012_09080</b></td></tr>
<tr><td colspan="2">Combustion parameters:</td></tr>
<tr><td>Lat=30.391370, Lon=49.859749 deg.</td><td>Tavg=1709.17 K, RHsum=4.02433 MW</td></tr>
<tr><td>Freq. detect.=94.99 %</td><td>Area=21.42 m2</td></tr>
<tr><td>BCM=0.11</td><td>Type: upstream</td></tr>
</table>]]></description><Point>
<coordinates>49.859749,30.391370,0</coordinates>
</Point>
</Placemark>
<Placemark>
<Style id="highlightPlacemark286">
<IconStyle>
<scale>0.75</scale>
<Icon>
<href>http://maps.google.com/mapfiles/ms/micons/red.png</href>
</Icon>
</IconStyle>
<LabelStyle>
<scale>0</scale>
</LabelStyle>
</Style>
<name>Rank 286</name>
<description><![CDATA[  <table width="500">
<tr><td>Country: <b>BRA</b></td><td>Flare ID: <b>vnfdb_2012_06136</b></td></tr>
<tr><td colspan="2">Combustion parameters:</td></tr>
<tr><td>Lat=-4.862571, Lon=-65.295686 deg.</td><td>Tavg=1820.76 K, RHsum=4.00832 MW</td></tr>
<tr><td>Freq. detect.=99.00 %</td><td>Area=20.86 m2</td></tr>
<tr><td>BCM=0.11</td><td>Type: upstream</td></tr>
</table>]]></description><Point>
<coordinates>-65.295686,-4.862571,0</coordinates>
</Point>
</Placemark>
<Placemark>
<Style id="highlightPlacemark287">
<IconStyle>
<scale>0.75</scale>
<Icon>
<href>http://maps.google.com/mapfiles/ms/micons/red.png</href>
</Icon>
</IconStyle>
<LabelStyle>
<scale>0</scale>
</LabelStyle>
</Style>
<name>Rank 287</name>
<description><![CDATA[  <table width="500">
<tr><td>Country: <b>RUS</b></td><td>Flare ID: <b>vnfdb_2012_07420</b></td></tr>
<tr><td colspan="2">Combustion parameters:</td></tr>
<tr><td>Lat=52.078441, Lon=53.357496 deg.</td><td>Tavg=1685.88 K, RHsum=4.00264 MW</td></tr>
<tr><td>Freq. detect.=91.40 %</td><td>Area=24.58 m2</td></tr>
<tr><td>BCM=0.11</td><td>Type: upstream</td></tr>
</table>]]></description><Point>
<coordinates>53.357496,52.078441,0</coordinates>
</Point>
</Placemark>
<Placemark>
<Style id="highlightPlacemark288">
<IconStyle>
<scale>0.75</scale>
<Icon>
<href>http://maps.google.com/mapfiles/ms/micons/red.png</href>
</Icon>
</IconStyle>
<LabelStyle>
<scale>0</scale>
</LabelStyle>
</Style>
<name>Rank 288</name>
<description><![CDATA[  <table width="500">
<tr><td>Country: <b>RUS</b></td><td>Flare ID: <b>vnfdb_2012_07498</b></td></tr>
<tr><td colspan="2">Combustion parameters:</td></tr>
<tr><td>Lat=51.594615, Lon=55.469870 deg.</td><td>Tavg=1791.05 K, RHsum=3.99803 MW</td></tr>
<tr><td>Freq. detect.=82.31 %</td><td>Area=17.24 m2</td></tr>
<tr><td>BCM=0.11</td><td>Type: upstream</td></tr>
</table>]]></description><Point>
<coordinates>55.469870,51.594615,0</coordinates>
</Point>
</Placemark>
<Placemark>
<Style id="highlightPlacemark289">
<IconStyle>
<scale>0.75</scale>
<Icon>
<href>http://maps.google.com/mapfiles/ms/micons/red.png</href>
</Icon>
</IconStyle>
<LabelStyle>
<scale>0</scale>
</LabelStyle>
</Style>
<name>Rank 289</name>
<description><![CDATA[  <table width="500">
<tr><td>Country: <b>NGA</b></td><td>Flare ID: <b>vnfdb_2012_09598</b></td></tr>
<tr><td colspan="2">Combustion parameters:</td></tr>
<tr><td>Lat=3.855560, Lon=6.979400 deg.</td><td>Tavg=1626.79 K, RHsum=3.98739 MW</td></tr>
<tr><td>Freq. detect.=96.59 %</td><td>Area=23.12 m2</td></tr>
<tr><td>BCM=0.109</td><td>Type: upstream</td></tr>
</table>]]></description><Point>
<coordinates>6.979400,3.855560,0</coordinates>
</Point>
</Placemark>
<Placemark>
<Style id="highlightPlacemark290">
<IconStyle>
<scale>0.75</scale>
<Icon>
<href>http://maps.google.com/mapfiles/ms/micons/red.png</href>
</Icon>
</IconStyle>
<LabelStyle>
<scale>0</scale>
</LabelStyle>
</Style>
<name>Rank 290</name>
<description><![CDATA[  <table width="500">
<tr><td>Country: <b>AZE</b></td><td>Flare ID: <b>vnfdb_2012_07302</b></td></tr>
<tr><td colspan="2">Combustion parameters:</td></tr>
<tr><td>Lat=40.084181, Lon=51.236747 deg.</td><td>Tavg=1742.1 K, RHsum=3.94797 MW</td></tr>
<tr><td>Freq. detect.=93.25 %</td><td>Area=17.55 m2</td></tr>
<tr><td>BCM=0.108</td><td>Type: upstream</td></tr>
</table>]]></description><Point>
<coordinates>51.236747,40.084181,0</coordinates>
</Point>
</Placemark>
<Placemark>
<Style id="highlightPlacemark291">
<IconStyle>
<scale>0.75</scale>
<Icon>
<href>http://maps.google.com/mapfiles/ms/micons/red.png</href>
</Icon>
</IconStyle>
<LabelStyle>
<scale>0</scale>
</LabelStyle>
</Style>
<name>Rank 291</name>
<description><![CDATA[  <table width="500">
<tr><td>Country: <b>RUS</b></td><td>Flare ID: <b>vnfdb_2012_10378</b></td></tr>
<tr><td colspan="2">Combustion parameters:</td></tr>
<tr><td>Lat=60.842355, Lon=70.789846 deg.</td><td>Tavg=1777.13 K, RHsum=3.91355 MW</td></tr>
<tr><td>Freq. detect.=80.23 %</td><td>Area=12.83 m2</td></tr>
<tr><td>BCM=0.107</td><td>Type: upstream</td></tr>
</table>]]></description><Point>
<coordinates>70.789846,60.842355,0</coordinates>
</Point>
</Placemark>
<Placemark>
<Style id="highlightPlacemark292">
<IconStyle>
<scale>0.75</scale>
<Icon>
<href>http://maps.google.com/mapfiles/ms/micons/red.png</href>
</Icon>
</IconStyle>
<LabelStyle>
<scale>0</scale>
</LabelStyle>
</Style>
<name>Rank 292</name>
<description><![CDATA[  <table width="500">
<tr><td>Country: <b>NGA</b></td><td>Flare ID: <b>vnfdb_2012_07981</b></td></tr>
<tr><td colspan="2">Combustion parameters:</td></tr>
<tr><td>Lat=5.620225, Lon=6.814156 deg.</td><td>Tavg=1728.85 K, RHsum=3.90188 MW</td></tr>
<tr><td>Freq. detect.=87.33 %</td><td>Area=20.40 m2</td></tr>
<tr><td>BCM=0.107</td><td>Type: upstream</td></tr>
</table>]]></description><Point>
<coordinates>6.814156,5.620225,0</coordinates>
</Point>
</Placemark>
<Placemark>
<Style id="highlightPlacemark293">
<IconStyle>
<scale>0.75</scale>
<Icon>
<href>http://maps.google.com/mapfiles/ms/micons/red.png</href>
</Icon>
</IconStyle>
<LabelStyle>
<scale>0</scale>
</LabelStyle>
</Style>
<name>Rank 293</name>
<description><![CDATA[  <table width="500">
<tr><td>Country: <b>PAK</b></td><td>Flare ID: <b>vnfdb_2012_11539</b></td></tr>
<tr><td colspan="2">Combustion parameters:</td></tr>
<tr><td>Lat=25.388201, Lon=68.581780 deg.</td><td>Tavg=1747.36 K, RHsum=3.89641 MW</td></tr>
<tr><td>Freq. detect.=94.02 %</td><td>Area=15.17 m2</td></tr>
<tr><td>BCM=0.107</td><td>Type: upstream</td></tr>
</table>]]></description><Point>
<coordinates>68.581780,25.388201,0</coordinates>
</Point>
</Placemark>
<Placemark>
<Style id="highlightPlacemark294">
<IconStyle>
<scale>0.75</scale>
<Icon>
<href>http://maps.google.com/mapfiles/ms/micons/red.png</href>
</Icon>
</IconStyle>
<LabelStyle>
<scale>0</scale>
</LabelStyle>
</Style>
<name>Rank 294</name>
<description><![CDATA[  <table width="500">
<tr><td>Country: <b>RUS</b></td><td>Flare ID: <b>vnfdb_2012_10714</b></td></tr>
<tr><td colspan="2">Combustion parameters:</td></tr>
<tr><td>Lat=63.469150, Lon=76.774049 deg.</td><td>Tavg=1793.55 K, RHsum=3.8925 MW</td></tr>
<tr><td>Freq. detect.=62.18 %</td><td>Area=19.55 m2</td></tr>
<tr><td>BCM=0.107</td><td>Type: upstream</td></tr>
</table>]]></description><Point>
<coordinates>76.774049,63.469150,0</coordinates>
</Point>
</Placemark>
<Placemark>
<Style id="highlightPlacemark295">
<IconStyle>
<scale>0.75</scale>
<Icon>
<href>http://maps.google.com/mapfiles/ms/micons/red.png</href>
</Icon>
</IconStyle>
<LabelStyle>
<scale>0</scale>
</LabelStyle>
</Style>
<name>Rank 295</name>
<description><![CDATA[  <table width="500">
<tr><td>Country: <b>VEN</b></td><td>Flare ID: <b>vnfdb_2012_06018</b></td></tr>
<tr><td colspan="2">Combustion parameters:</td></tr>
<tr><td>Lat=10.007968, Lon=-62.239419 deg.</td><td>Tavg=1706.91 K, RHsum=3.89109 MW</td></tr>
<tr><td>Freq. detect.=96.59 %</td><td>Area=17.83 m2</td></tr>
<tr><td>BCM=0.107</td><td>Type: upstream</td></tr>
</table>]]></description><Point>
<coordinates>-62.239419,10.007968,0</coordinates>
</Point>
</Placemark>
<Placemark>
<Style id="highlightPlacemark296">
<IconStyle>
<scale>0.75</scale>
<Icon>
<href>http://maps.google.com/mapfiles/ms/micons/red.png</href>
</Icon>
</IconStyle>
<LabelStyle>
<scale>0</scale>
</LabelStyle>
</Style>
<name>Rank 296</name>
<description><![CDATA[  <table width="500">
<tr><td>Country: <b>NGA</b></td><td>Flare ID: <b>vnfdb_2012_07937</b></td></tr>
<tr><td colspan="2">Combustion parameters:</td></tr>
<tr><td>Lat=5.100386, Lon=6.506212 deg.</td><td>Tavg=1730.35 K, RHsum=3.88971 MW</td></tr>
<tr><td>Freq. detect.=96.03 %</td><td>Area=18.89 m2</td></tr>
<tr><td>BCM=0.107</td><td>Type: upstream</td></tr>
</table>]]></description><Point>
<coordinates>6.506212,5.100386,0</coordinates>
</Point>
</Placemark>
<Placemark>
<Style id="highlightPlacemark297">
<IconStyle>
<scale>0.75</scale>
<Icon>
<href>http://maps.google.com/mapfiles/ms/micons/red.png</href>
</Icon>
</IconStyle>
<LabelStyle>
<scale>0</scale>
</LabelStyle>
</Style>
<name>Rank 297</name>
<description><![CDATA[  <table width="500">
<tr><td>Country: <b>NGA</b></td><td>Flare ID: <b>vnfdb_2012_07938</b></td></tr>
<tr><td colspan="2">Combustion parameters:</td></tr>
<tr><td>Lat=5.659966, Lon=6.517120 deg.</td><td>Tavg=1653.18 K, RHsum=3.88911 MW</td></tr>
<tr><td>Freq. detect.=93.56 %</td><td>Area=25.23 m2</td></tr>
<tr><td>BCM=0.107</td><td>Type: upstream</td></tr>
</table>]]></description><Point>
<coordinates>6.517120,5.659966,0</coordinates>
</Point>
</Placemark>
<Placemark>
<Style id="highlightPlacemark298">
<IconStyle>
<scale>0.75</scale>
<Icon>
<href>http://maps.google.com/mapfiles/ms/micons/red.png</href>
</Icon>
</IconStyle>
<LabelStyle>
<scale>0</scale>
</LabelStyle>
</Style>
<name>Rank 298</name>
<description><![CDATA[  <table width="500">
<tr><td>Country: <b>RUS</b></td><td>Flare ID: <b>vnfdb_2012_10670</b></td></tr>
<tr><td colspan="2">Combustion parameters:</td></tr>
<tr><td>Lat=59.275542, Lon=76.551806 deg.</td><td>Tavg=1761.07 K, RHsum=3.8829 MW</td></tr>
<tr><td>Freq. detect.=87.79 %</td><td>Area=16.28 m2</td></tr>
<tr><td>BCM=0.106</td><td>Type: upstream</td></tr>
</table>]]></description><Point>
<coordinates>76.551806,59.275542,0</coordinates>
</Point>
</Placemark>
<Placemark>
<Style id="highlightPlacemark299">
<IconStyle>
<scale>0.75</scale>
<Icon>
<href>http://maps.google.com/mapfiles/ms/micons/red.png</href>
</Icon>
</IconStyle>
<LabelStyle>
<scale>0</scale>
</LabelStyle>
</Style>
<name>Rank 299</name>
<description><![CDATA[  <table width="500">
<tr><td>Country: <b>RUS</b></td><td>Flare ID: <b>vnfdb_2012_10387</b></td></tr>
<tr><td colspan="2">Combustion parameters:</td></tr>
<tr><td>Lat=60.304883, Lon=70.893937 deg.</td><td>Tavg=1792.35 K, RHsum=3.87736 MW</td></tr>
<tr><td>Freq. detect.=88.46 %</td><td>Area=13.92 m2</td></tr>
<tr><td>BCM=0.106</td><td>Type: upstream</td></tr>
</table>]]></description><Point>
<coordinates>70.893937,60.304883,0</coordinates>
</Point>
</Placemark>
<Placemark>
<Style id="highlightPlacemark300">
<IconStyle>
<scale>0.75</scale>
<Icon>
<href>http://maps.google.com/mapfiles/ms/micons/red.png</href>
</Icon>
</IconStyle>
<LabelStyle>
<scale>0</scale>
</LabelStyle>
</Style>
<name>Rank 300</name>
<description><![CDATA[  <table width="500">
<tr><td>Country: <b>IND</b></td><td>Flare ID: <b>vnfdb_2012_11575</b></td></tr>
<tr><td colspan="2">Combustion parameters:</td></tr>
<tr><td>Lat=19.371154, Lon=71.352906 deg.</td><td>Tavg=1628.47 K, RHsum=3.877 MW</td></tr>
<tr><td>Freq. detect.=92.17 %</td><td>Area=30.68 m2</td></tr>
<tr><td>BCM=0.106</td><td>Type: upstream</td></tr>
</table>]]></description><Point>
<coordinates>71.352906,19.371154,0</coordinates>
</Point>
</Placemark>
<Placemark>
<Style id="highlightPlacemark301">
<IconStyle>
<scale>0.75</scale>
<Icon>
<href>http://maps.google.com/mapfiles/ms/micons/red.png</href>
</Icon>
</IconStyle>
<LabelStyle>
<scale>0</scale>
</LabelStyle>
</Style>
<name>Rank 301</name>
<description><![CDATA[  <table width="500">
<tr><td>Country: <b>PHL</b></td><td>Flare ID: <b>vnfdb_2012_12476</b></td></tr>
<tr><td colspan="2">Combustion parameters:</td></tr>
<tr><td>Lat=11.977608, Lon=119.310963 deg.</td><td>Tavg=1802.32 K, RHsum=3.86843 MW</td></tr>
<tr><td>Freq. detect.=83.21 %</td><td>Area=14.16 m2</td></tr>
<tr><td>BCM=0.106</td><td>Type: upstream</td></tr>
</table>]]></description><Point>
<coordinates>119.310963,11.977608,0</coordinates>
</Point>
</Placemark>
<Placemark>
<Style id="highlightPlacemark302">
<IconStyle>
<scale>0.75</scale>
<Icon>
<href>http://maps.google.com/mapfiles/ms/micons/red.png</href>
</Icon>
</IconStyle>
<LabelStyle>
<scale>0</scale>
</LabelStyle>
</Style>
<name>Rank 302</name>
<description><![CDATA[  <table width="500">
<tr><td>Country: <b>IRN</b></td><td>Flare ID: <b>vnfdb_2012_09031</b></td></tr>
<tr><td colspan="2">Combustion parameters:</td></tr>
<tr><td>Lat=29.331043, Lon=49.492877 deg.</td><td>Tavg=1651.87 K, RHsum=3.86024 MW</td></tr>
<tr><td>Freq. detect.=73.24 %</td><td>Area=24.30 m2</td></tr>
<tr><td>BCM=0.106</td><td>Type: upstream</td></tr>
</table>]]></description><Point>
<coordinates>49.492877,29.331043,0</coordinates>
</Point>
</Placemark>
<Placemark>
<Style id="highlightPlacemark303">
<IconStyle>
<scale>0.75</scale>
<Icon>
<href>http://maps.google.com/mapfiles/ms/micons/red.png</href>
</Icon>
</IconStyle>
<LabelStyle>
<scale>0</scale>
</LabelStyle>
</Style>
<name>Rank 303</name>
<description><![CDATA[  <table width="500">
<tr><td>Country: <b>IRN</b></td><td>Flare ID: <b>vnfdb_2012_08877</b></td></tr>
<tr><td colspan="2">Combustion parameters:</td></tr>
<tr><td>Lat=31.237722, Lon=48.986530 deg.</td><td>Tavg=1559.31 K, RHsum=3.85715 MW</td></tr>
<tr><td>Freq. detect.=90.86 %</td><td>Area=44.34 m2</td></tr>
<tr><td>BCM=0.106</td><td>Type: upstream</td></tr>
</table>]]></description><Point>
<coordinates>48.986530,31.237722,0</coordinates>
</Point>
</Placemark>
<Placemark>
<Style id="highlightPlacemark304">
<IconStyle>
<scale>0.75</scale>
<Icon>
<href>http://maps.google.com/mapfiles/ms/micons/red.png</href>
</Icon>
</IconStyle>
<LabelStyle>
<scale>0</scale>
</LabelStyle>
</Style>
<name>Rank 304</name>
<description><![CDATA[  <table width="500">
<tr><td>Country: <b>NGA</b></td><td>Flare ID: <b>vnfdb_2012_07780</b></td></tr>
<tr><td colspan="2">Combustion parameters:</td></tr>
<tr><td>Lat=5.862112, Lon=5.131727 deg.</td><td>Tavg=1716.87 K, RHsum=3.85695 MW</td></tr>
<tr><td>Freq. detect.=91.14 %</td><td>Area=16.56 m2</td></tr>
<tr><td>BCM=0.106</td><td>Type: upstream</td></tr>
</table>]]></description><Point>
<coordinates>5.131727,5.862112,0</coordinates>
</Point>
</Placemark>
<Placemark>
<Style id="highlightPlacemark305">
<IconStyle>
<scale>0.75</scale>
<Icon>
<href>http://maps.google.com/mapfiles/ms/micons/red.png</href>
</Icon>
</IconStyle>
<LabelStyle>
<scale>0</scale>
</LabelStyle>
</Style>
<name>Rank 305</name>
<description><![CDATA[  <table width="500">
<tr><td>Country: <b>RUS</b></td><td>Flare ID: <b>vnfdb_2012_10345</b></td></tr>
<tr><td colspan="2">Combustion parameters:</td></tr>
<tr><td>Lat=60.803535, Lon=69.602878 deg.</td><td>Tavg=1806.84 K, RHsum=3.82634 MW</td></tr>
<tr><td>Freq. detect.=82.27 %</td><td>Area=16.01 m2</td></tr>
<tr><td>BCM=0.105</td><td>Type: upstream</td></tr>
</table>]]></description><Point>
<coordinates>69.602878,60.803535,0</coordinates>
</Point>
</Placemark>
<Placemark>
<Style id="highlightPlacemark306">
<IconStyle>
<scale>0.75</scale>
<Icon>
<href>http://maps.google.com/mapfiles/ms/micons/red.png</href>
</Icon>
</IconStyle>
<LabelStyle>
<scale>0</scale>
</LabelStyle>
</Style>
<name>Rank 306</name>
<description><![CDATA[  <table width="500">
<tr><td>Country: <b>GAB</b></td><td>Flare ID: <b>vnfdb_2012_09821</b></td></tr>
<tr><td colspan="2">Combustion parameters:</td></tr>
<tr><td>Lat=-3.860692, Lon=10.947335 deg.</td><td>Tavg=1676.45 K, RHsum=3.82328 MW</td></tr>
<tr><td>Freq. detect.=93.00 %</td><td>Area=18.38 m2</td></tr>
<tr><td>BCM=0.105</td><td>Type: upstream</td></tr>
</table>]]></description><Point>
<coordinates>10.947335,-3.860692,0</coordinates>
</Point>
</Placemark>
<Placemark>
<Style id="highlightPlacemark307">
<IconStyle>
<scale>0.75</scale>
<Icon>
<href>http://maps.google.com/mapfiles/ms/micons/red.png</href>
</Icon>
</IconStyle>
<LabelStyle>
<scale>0</scale>
</LabelStyle>
</Style>
<name>Rank 307</name>
<description><![CDATA[  <table width="500">
<tr><td>Country: <b>RUS</b></td><td>Flare ID: <b>vnfdb_2012_07544</b></td></tr>
<tr><td colspan="2">Combustion parameters:</td></tr>
<tr><td>Lat=67.180215, Lon=56.624660 deg.</td><td>Tavg=1930.42 K, RHsum=3.81171 MW</td></tr>
<tr><td>Freq. detect.=84.01 %</td><td>Area=10.54 m2</td></tr>
<tr><td>BCM=0.104</td><td>Type: upstream</td></tr>
</table>]]></description><Point>
<coordinates>56.624660,67.180215,0</coordinates>
</Point>
</Placemark>
<Placemark>
<Style id="highlightPlacemark308">
<IconStyle>
<scale>0.75</scale>
<Icon>
<href>http://maps.google.com/mapfiles/ms/micons/red.png</href>
</Icon>
</IconStyle>
<LabelStyle>
<scale>0</scale>
</LabelStyle>
</Style>
<name>Rank 308</name>
<description><![CDATA[  <table width="500">
<tr><td>Country: <b>LBY</b></td><td>Flare ID: <b>vnfdb_2012_08172</b></td></tr>
<tr><td colspan="2">Combustion parameters:</td></tr>
<tr><td>Lat=27.583827, Lon=18.468091 deg.</td><td>Tavg=1704.12 K, RHsum=3.80799 MW</td></tr>
<tr><td>Freq. detect.=93.41 %</td><td>Area=18.06 m2</td></tr>
<tr><td>BCM=0.104</td><td>Type: upstream</td></tr>
</table>]]></description><Point>
<coordinates>18.468091,27.583827,0</coordinates>
</Point>
</Placemark>
<Placemark>
<Style id="highlightPlacemark309">
<IconStyle>
<scale>0.75</scale>
<Icon>
<href>http://maps.google.com/mapfiles/ms/micons/red.png</href>
</Icon>
</IconStyle>
<LabelStyle>
<scale>0</scale>
</LabelStyle>
</Style>
<name>Rank 309</name>
<description><![CDATA[  <table width="500">
<tr><td>Country: <b>RUS</b></td><td>Flare ID: <b>vnfdb_2012_10354</b></td></tr>
<tr><td colspan="2">Combustion parameters:</td></tr>
<tr><td>Lat=60.627923, Lon=69.801038 deg.</td><td>Tavg=1784.15 K, RHsum=3.80714 MW</td></tr>
<tr><td>Freq. detect.=87.61 %</td><td>Area=15.32 m2</td></tr>
<tr><td>BCM=0.104</td><td>Type: upstream</td></tr>
</table>]]></description><Point>
<coordinates>69.801038,60.627923,0</coordinates>
</Point>
</Placemark>
<Placemark>
<Style id="highlightPlacemark310">
<IconStyle>
<scale>0.75</scale>
<Icon>
<href>http://maps.google.com/mapfiles/kml/shapes/gas_stations.png</href>
</Icon>
</IconStyle>
<LabelStyle>
<scale>0</scale>
</LabelStyle>
</Style>
<name>Rank 310</name>
<description><![CDATA[  <table width="500">
<tr><td>Country: <b>MEX</b></td><td>Flare ID: <b>vnfdb_2012_05422</b></td></tr>
<tr><td colspan="2">Combustion parameters:</td></tr>
<tr><td>Lat=17.984974, Lon=-94.526366 deg.</td><td>Tavg=1737.14 K, RHsum=3.77936 MW</td></tr>
<tr><td>Freq. detect.=96.86 %</td><td>Area=16.48 m2</td></tr>
<tr><td>BCM=0.104</td><td>Type: downstream</td></tr>
</table>]]></description><Point>
<coordinates>-94.526366,17.984974,0</coordinates>
</Point>
</Placemark>
<Placemark>
<Style id="highlightPlacemark311">
<IconStyle>
<scale>0.75</scale>
<Icon>
<href>http://maps.google.com/mapfiles/ms/micons/red.png</href>
</Icon>
</IconStyle>
<LabelStyle>
<scale>0</scale>
</LabelStyle>
</Style>
<name>Rank 311</name>
<description><![CDATA[  <table width="500">
<tr><td>Country: <b>VEN</b></td><td>Flare ID: <b>vnfdb_2012_06001</b></td></tr>
<tr><td colspan="2">Combustion parameters:</td></tr>
<tr><td>Lat=9.775719, Lon=-63.269168 deg.</td><td>Tavg=1778.25 K, RHsum=3.75621 MW</td></tr>
<tr><td>Freq. detect.=95.39 %</td><td>Area=13.63 m2</td></tr>
<tr><td>BCM=0.103</td><td>Type: upstream</td></tr>
</table>]]></description><Point>
<coordinates>-63.269168,9.775719,0</coordinates>
</Point>
</Placemark>
<Placemark>
<Style id="highlightPlacemark312">
<IconStyle>
<scale>0.75</scale>
<Icon>
<href>http://maps.google.com/mapfiles/ms/micons/red.png</href>
</Icon>
</IconStyle>
<LabelStyle>
<scale>0</scale>
</LabelStyle>
</Style>
<name>Rank 312</name>
<description><![CDATA[  <table width="500">
<tr><td>Country: <b>KAZ</b></td><td>Flare ID: <b>vnfdb_2012_07631</b></td></tr>
<tr><td colspan="2">Combustion parameters:</td></tr>
<tr><td>Lat=48.471969, Lon=57.654281 deg.</td><td>Tavg=1744.45 K, RHsum=3.74676 MW</td></tr>
<tr><td>Freq. detect.=92.24 %</td><td>Area=14.25 m2</td></tr>
<tr><td>BCM=0.103</td><td>Type: upstream</td></tr>
</table>]]></description><Point>
<coordinates>57.654281,48.471969,0</coordinates>
</Point>
</Placemark>
<Placemark>
<Style id="highlightPlacemark313">
<IconStyle>
<scale>0.75</scale>
<Icon>
<href>http://maps.google.com/mapfiles/ms/micons/red.png</href>
</Icon>
</IconStyle>
<LabelStyle>
<scale>0</scale>
</LabelStyle>
</Style>
<name>Rank 313</name>
<description><![CDATA[  <table width="500">
<tr><td>Country: <b>NGA</b></td><td>Flare ID: <b>vnfdb_2012_09560</b></td></tr>
<tr><td colspan="2">Combustion parameters:</td></tr>
<tr><td>Lat=3.941298, Lon=6.397063 deg.</td><td>Tavg=1634.14 K, RHsum=3.74594 MW</td></tr>
<tr><td>Freq. detect.=96.00 %</td><td>Area=22.60 m2</td></tr>
<tr><td>BCM=0.103</td><td>Type: upstream</td></tr>
</table>]]></description><Point>
<coordinates>6.397063,3.941298,0</coordinates>
</Point>
</Placemark>
<Placemark>
<Style id="highlightPlacemark314">
<IconStyle>
<scale>0.75</scale>
<Icon>
<href>http://maps.google.com/mapfiles/ms/micons/red.png</href>
</Icon>
</IconStyle>
<LabelStyle>
<scale>0</scale>
</LabelStyle>
</Style>
<name>Rank 314</name>
<description><![CDATA[  <table width="500">
<tr><td>Country: <b>VNM</b></td><td>Flare ID: <b>vnfdb_2012_12097</b></td></tr>
<tr><td colspan="2">Combustion parameters:</td></tr>
<tr><td>Lat=8.488950, Lon=108.676340 deg.</td><td>Tavg=1643.34 K, RHsum=3.74426 MW</td></tr>
<tr><td>Freq. detect.=92.53 %</td><td>Area=20.80 m2</td></tr>
<tr><td>BCM=0.103</td><td>Type: upstream</td></tr>
</table>]]></description><Point>
<coordinates>108.676340,8.488950,0</coordinates>
</Point>
</Placemark>
<Placemark>
<Style id="highlightPlacemark315">
<IconStyle>
<scale>0.75</scale>
<Icon>
<href>http://maps.google.com/mapfiles/ms/micons/red.png</href>
</Icon>
</IconStyle>
<LabelStyle>
<scale>0</scale>
</LabelStyle>
</Style>
<name>Rank 315</name>
<description><![CDATA[  <table width="500">
<tr><td>Country: <b>RUS</b></td><td>Flare ID: <b>vnfdb_2012_10818</b></td></tr>
<tr><td colspan="2">Combustion parameters:</td></tr>
<tr><td>Lat=61.515781, Lon=77.375037 deg.</td><td>Tavg=1755.49 K, RHsum=3.74226 MW</td></tr>
<tr><td>Freq. detect.=91.57 %</td><td>Area=16.53 m2</td></tr>
<tr><td>BCM=0.103</td><td>Type: upstream</td></tr>
</table>]]></description><Point>
<coordinates>77.375037,61.515781,0</coordinates>
</Point>
</Placemark>
<Placemark>
<Style id="highlightPlacemark316">
<IconStyle>
<scale>0.75</scale>
<Icon>
<href>http://maps.google.com/mapfiles/ms/micons/red.png</href>
</Icon>
</IconStyle>
<LabelStyle>
<scale>0</scale>
</LabelStyle>
</Style>
<name>Rank 316</name>
<description><![CDATA[  <table width="500">
<tr><td>Country: <b>IND</b></td><td>Flare ID: <b>vnfdb_2012_11823</b></td></tr>
<tr><td colspan="2">Combustion parameters:</td></tr>
<tr><td>Lat=27.606010, Lon=95.401669 deg.</td><td>Tavg=1652.88 K, RHsum=3.74166 MW</td></tr>
<tr><td>Freq. detect.=90.28 %</td><td>Area=21.63 m2</td></tr>
<tr><td>BCM=0.103</td><td>Type: upstream</td></tr>
</table>]]></description><Point>
<coordinates>95.401669,27.606010,0</coordinates>
</Point>
</Placemark>
<Placemark>
<Style id="highlightPlacemark317">
<IconStyle>
<scale>0.75</scale>
<Icon>
<href>http://maps.google.com/mapfiles/ms/micons/red.png</href>
</Icon>
</IconStyle>
<LabelStyle>
<scale>0</scale>
</LabelStyle>
</Style>
<name>Rank 317</name>
<description><![CDATA[  <table width="500">
<tr><td>Country: <b>NGA</b></td><td>Flare ID: <b>vnfdb_2012_07724</b></td></tr>
<tr><td colspan="2">Combustion parameters:</td></tr>
<tr><td>Lat=5.709295, Lon=4.480536 deg.</td><td>Tavg=1643.26 K, RHsum=3.73364 MW</td></tr>
<tr><td>Freq. detect.=96.15 %</td><td>Area=20.19 m2</td></tr>
<tr><td>BCM=0.102</td><td>Type: upstream</td></tr>
</table>]]></description><Point>
<coordinates>4.480536,5.709295,0</coordinates>
</Point>
</Placemark>
<Placemark>
<Style id="highlightPlacemark318">
<IconStyle>
<scale>0.75</scale>
<Icon>
<href>http://maps.google.com/mapfiles/ms/micons/red.png</href>
</Icon>
</IconStyle>
<LabelStyle>
<scale>0</scale>
</LabelStyle>
</Style>
<name>Rank 318</name>
<description><![CDATA[  <table width="500">
<tr><td>Country: <b>DZA</b></td><td>Flare ID: <b>vnfdb_2012_08009</b></td></tr>
<tr><td colspan="2">Combustion parameters:</td></tr>
<tr><td>Lat=28.618979, Lon=7.707840 deg.</td><td>Tavg=1654.67 K, RHsum=3.715 MW</td></tr>
<tr><td>Freq. detect.=97.36 %</td><td>Area=21.10 m2</td></tr>
<tr><td>BCM=0.102</td><td>Type: upstream</td></tr>
</table>]]></description><Point>
<coordinates>7.707840,28.618979,0</coordinates>
</Point>
</Placemark>
<Placemark>
<Style id="highlightPlacemark319">
<IconStyle>
<scale>0.75</scale>
<Icon>
<href>http://maps.google.com/mapfiles/ms/micons/red.png</href>
</Icon>
</IconStyle>
<LabelStyle>
<scale>0</scale>
</LabelStyle>
</Style>
<name>Rank 319</name>
<description><![CDATA[  <table width="500">
<tr><td>Country: <b>UZB</b></td><td>Flare ID: <b>vnfdb_2012_11509</b></td></tr>
<tr><td colspan="2">Combustion parameters:</td></tr>
<tr><td>Lat=38.558621, Lon=65.951876 deg.</td><td>Tavg=1710.84 K, RHsum=3.71428 MW</td></tr>
<tr><td>Freq. detect.=95.02 %</td><td>Area=15.79 m2</td></tr>
<tr><td>BCM=0.102</td><td>Type: upstream</td></tr>
</table>]]></description><Point>
<coordinates>65.951876,38.558621,0</coordinates>
</Point>
</Placemark>
<Placemark>
<Style id="highlightPlacemark320">
<IconStyle>
<scale>0.75</scale>
<Icon>
<href>http://maps.google.com/mapfiles/ms/micons/red.png</href>
</Icon>
</IconStyle>
<LabelStyle>
<scale>0</scale>
</LabelStyle>
</Style>
<name>Rank 320</name>
<description><![CDATA[  <table width="500">
<tr><td>Country: <b>RUS</b></td><td>Flare ID: <b>vnfdb_2012_07480</b></td></tr>
<tr><td colspan="2">Combustion parameters:</td></tr>
<tr><td>Lat=51.875406, Lon=54.757961 deg.</td><td>Tavg=1733.14 K, RHsum=3.71156 MW</td></tr>
<tr><td>Freq. detect.=93.51 %</td><td>Area=17.55 m2</td></tr>
<tr><td>BCM=0.102</td><td>Type: upstream</td></tr>
</table>]]></description><Point>
<coordinates>54.757961,51.875406,0</coordinates>
</Point>
</Placemark>
<Placemark>
<Style id="highlightPlacemark321">
<IconStyle>
<scale>0.75</scale>
<Icon>
<href>http://maps.google.com/mapfiles/ms/micons/red.png</href>
</Icon>
</IconStyle>
<LabelStyle>
<scale>0</scale>
</LabelStyle>
</Style>
<name>Rank 321</name>
<description><![CDATA[  <table width="500">
<tr><td>Country: <b>AGO</b></td><td>Flare ID: <b>vnfdb_2012_09870</b></td></tr>
<tr><td colspan="2">Combustion parameters:</td></tr>
<tr><td>Lat=-5.423219, Lon=11.999093 deg.</td><td>Tavg=1755.9 K, RHsum=3.68131 MW</td></tr>
<tr><td>Freq. detect.=96.57 %</td><td>Area=22.13 m2</td></tr>
<tr><td>BCM=0.101</td><td>Type: upstream</td></tr>
</table>]]></description><Point>
<coordinates>11.999093,-5.423219,0</coordinates>
</Point>
</Placemark>
<Placemark>
<Style id="highlightPlacemark322">
<IconStyle>
<scale>0.75</scale>
<Icon>
<href>http://maps.google.com/mapfiles/ms/micons/red.png</href>
</Icon>
</IconStyle>
<LabelStyle>
<scale>0</scale>
</LabelStyle>
</Style>
<name>Rank 322</name>
<description><![CDATA[  <table width="500">
<tr><td>Country: <b>UZB</b></td><td>Flare ID: <b>vnfdb_2012_11468</b></td></tr>
<tr><td colspan="2">Combustion parameters:</td></tr>
<tr><td>Lat=38.800162, Lon=64.643807 deg.</td><td>Tavg=1698.78 K, RHsum=3.67486 MW</td></tr>
<tr><td>Freq. detect.=97.44 %</td><td>Area=14.42 m2</td></tr>
<tr><td>BCM=0.101</td><td>Type: upstream</td></tr>
</table>]]></description><Point>
<coordinates>64.643807,38.800162,0</coordinates>
</Point>
</Placemark>
<Placemark>
<Style id="highlightPlacemark323">
<IconStyle>
<scale>0.75</scale>
<Icon>
<href>http://maps.google.com/mapfiles/ms/micons/red.png</href>
</Icon>
</IconStyle>
<LabelStyle>
<scale>0</scale>
</LabelStyle>
</Style>
<name>Rank 323</name>
<description><![CDATA[  <table width="500">
<tr><td>Country: <b>AGO</b></td><td>Flare ID: <b>vnfdb_2012_09843</b></td></tr>
<tr><td colspan="2">Combustion parameters:</td></tr>
<tr><td>Lat=-5.488668, Lon=11.513184 deg.</td><td>Tavg=1699.96 K, RHsum=3.66668 MW</td></tr>
<tr><td>Freq. detect.=91.72 %</td><td>Area=21.68 m2</td></tr>
<tr><td>BCM=0.1</td><td>Type: upstream</td></tr>
</table>]]></description><Point>
<coordinates>11.513184,-5.488668,0</coordinates>
</Point>
</Placemark>
<Placemark>
<Style id="highlightPlacemark324">
<IconStyle>
<scale>0.75</scale>
<Icon>
<href>http://maps.google.com/mapfiles/kml/shapes/gas_stations.png</href>
</Icon>
</IconStyle>
<LabelStyle>
<scale>0</scale>
</LabelStyle>
</Style>
<name>Rank 324</name>
<description><![CDATA[  <table width="500">
<tr><td>Country: <b>MEX</b></td><td>Flare ID: <b>vnfdb_2012_03645</b></td></tr>
<tr><td colspan="2">Combustion parameters:</td></tr>
<tr><td>Lat=20.579993, Lon=-101.172436 deg.</td><td>Tavg=1603.33 K, RHsum=3.65772 MW</td></tr>
<tr><td>Freq. detect.=98.67 %</td><td>Area=21.54 m2</td></tr>
<tr><td>BCM=0.1</td><td>Type: downstream</td></tr>
</table>]]></description><Point>
<coordinates>-101.172436,20.579993,0</coordinates>
</Point>
</Placemark>
<Placemark>
<Style id="highlightPlacemark325">
<IconStyle>
<scale>0.75</scale>
<Icon>
<href>http://maps.google.com/mapfiles/ms/micons/red.png</href>
</Icon>
</IconStyle>
<LabelStyle>
<scale>0</scale>
</LabelStyle>
</Style>
<name>Rank 325</name>
<description><![CDATA[  <table width="500">
<tr><td>Country: <b>LBY</b></td><td>Flare ID: <b>vnfdb_2012_08247</b></td></tr>
<tr><td colspan="2">Combustion parameters:</td></tr>
<tr><td>Lat=28.785268, Lon=22.458819 deg.</td><td>Tavg=1755.82 K, RHsum=3.65713 MW</td></tr>
<tr><td>Freq. detect.=94.11 %</td><td>Area=12.69 m2</td></tr>
<tr><td>BCM=0.1</td><td>Type: upstream</td></tr>
</table>]]></description><Point>
<coordinates>22.458819,28.785268,0</coordinates>
</Point>
</Placemark>
<Placemark>
<Style id="highlightPlacemark326">
<IconStyle>
<scale>0.75</scale>
<Icon>
<href>http://maps.google.com/mapfiles/ms/micons/red.png</href>
</Icon>
</IconStyle>
<LabelStyle>
<scale>0</scale>
</LabelStyle>
</Style>
<name>Rank 326</name>
<description><![CDATA[  <table width="500">
<tr><td>Country: <b>RUS</b></td><td>Flare ID: <b>vnfdb_2012_11243</b></td></tr>
<tr><td colspan="2">Combustion parameters:</td></tr>
<tr><td>Lat=57.985032, Lon=106.797287 deg.</td><td>Tavg=1776.75 K, RHsum=3.63081 MW</td></tr>
<tr><td>Freq. detect.=89.09 %</td><td>Area=15.26 m2</td></tr>
<tr><td>BCM=0.0995</td><td>Type: upstream</td></tr>
</table>]]></description><Point>
<coordinates>106.797287,57.985032,0</coordinates>
</Point>
</Placemark>
<Placemark>
<Style id="highlightPlacemark327">
<IconStyle>
<scale>0.75</scale>
<Icon>
<href>http://maps.google.com/mapfiles/ms/micons/red.png</href>
</Icon>
</IconStyle>
<LabelStyle>
<scale>0</scale>
</LabelStyle>
</Style>
<name>Rank 327</name>
<description><![CDATA[  <table width="500">
<tr><td>Country: <b>AGO</b></td><td>Flare ID: <b>vnfdb_2012_09909</b></td></tr>
<tr><td colspan="2">Combustion parameters:</td></tr>
<tr><td>Lat=-7.066285, Lon=12.410247 deg.</td><td>Tavg=1667.32 K, RHsum=3.61502 MW</td></tr>
<tr><td>Freq. detect.=92.61 %</td><td>Area=17.24 m2</td></tr>
<tr><td>BCM=0.0991</td><td>Type: upstream</td></tr>
</table>]]></description><Point>
<coordinates>12.410247,-7.066285,0</coordinates>
</Point>
</Placemark>
<Placemark>
<Style id="highlightPlacemark328">
<IconStyle>
<scale>0.75</scale>
<Icon>
<href>http://maps.google.com/mapfiles/ms/micons/red.png</href>
</Icon>
</IconStyle>
<LabelStyle>
<scale>0</scale>
</LabelStyle>
</Style>
<name>Rank 328</name>
<description><![CDATA[  <table width="500">
<tr><td>Country: <b>IRN</b></td><td>Flare ID: <b>vnfdb_2012_11413</b></td></tr>
<tr><td colspan="2">Combustion parameters:</td></tr>
<tr><td>Lat=36.465663, Lon=60.850525 deg.</td><td>Tavg=1655.98 K, RHsum=3.61284 MW</td></tr>
<tr><td>Freq. detect.=92.95 %</td><td>Area=21.90 m2</td></tr>
<tr><td>BCM=0.099</td><td>Type: upstream</td></tr>
</table>]]></description><Point>
<coordinates>60.850525,36.465663,0</coordinates>
</Point>
</Placemark>
<Placemark>
<Style id="highlightPlacemark329">
<IconStyle>
<scale>0.75</scale>
<Icon>
<href>http://maps.google.com/mapfiles/ms/micons/red.png</href>
</Icon>
</IconStyle>
<LabelStyle>
<scale>0</scale>
</LabelStyle>
</Style>
<name>Rank 329</name>
<description><![CDATA[  <table width="500">
<tr><td>Country: <b>VNM</b></td><td>Flare ID: <b>vnfdb_2012_12085</b></td></tr>
<tr><td colspan="2">Combustion parameters:</td></tr>
<tr><td>Lat=10.386726, Lon=108.506634 deg.</td><td>Tavg=1611.93 K, RHsum=3.60948 MW</td></tr>
<tr><td>Freq. detect.=92.84 %</td><td>Area=21.80 m2</td></tr>
<tr><td>BCM=0.0989</td><td>Type: upstream</td></tr>
</table>]]></description><Point>
<coordinates>108.506634,10.386726,0</coordinates>
</Point>
</Placemark>
<Placemark>
<Style id="highlightPlacemark330">
<IconStyle>
<scale>0.75</scale>
<Icon>
<href>http://maps.google.com/mapfiles/ms/micons/red.png</href>
</Icon>
</IconStyle>
<LabelStyle>
<scale>0</scale>
</LabelStyle>
</Style>
<name>Rank 330</name>
<description><![CDATA[  <table width="500">
<tr><td>Country: <b>DZA</b></td><td>Flare ID: <b>vnfdb_2012_07762</b></td></tr>
<tr><td colspan="2">Combustion parameters:</td></tr>
<tr><td>Lat=31.848313, Lon=5.054139 deg.</td><td>Tavg=1569.71 K, RHsum=3.60235 MW</td></tr>
<tr><td>Freq. detect.=94.59 %</td><td>Area=28.17 m2</td></tr>
<tr><td>BCM=0.0987</td><td>Type: upstream</td></tr>
</table>]]></description><Point>
<coordinates>5.054139,31.848313,0</coordinates>
</Point>
</Placemark>
<Placemark>
<Style id="highlightPlacemark331">
<IconStyle>
<scale>0.75</scale>
<Icon>
<href>http://maps.google.com/mapfiles/ms/micons/red.png</href>
</Icon>
</IconStyle>
<LabelStyle>
<scale>0</scale>
</LabelStyle>
</Style>
<name>Rank 331</name>
<description><![CDATA[  <table width="500">
<tr><td>Country: <b>IRN</b></td><td>Flare ID: <b>vnfdb_2012_09258</b></td></tr>
<tr><td colspan="2">Combustion parameters:</td></tr>
<tr><td>Lat=27.931444, Lon=52.194793 deg.</td><td>Tavg=1676.65 K, RHsum=3.59145 MW</td></tr>
<tr><td>Freq. detect.=78.31 %</td><td>Area=21.79 m2</td></tr>
<tr><td>BCM=0.0984</td><td>Type: upstream</td></tr>
</table>]]></description><Point>
<coordinates>52.194793,27.931444,0</coordinates>
</Point>
</Placemark>
<Placemark>
<Style id="highlightPlacemark332">
<IconStyle>
<scale>0.75</scale>
<Icon>
<href>http://maps.google.com/mapfiles/ms/micons/red.png</href>
</Icon>
</IconStyle>
<LabelStyle>
<scale>0</scale>
</LabelStyle>
</Style>
<name>Rank 332</name>
<description><![CDATA[  <table width="500">
<tr><td>Country: <b>UZB</b></td><td>Flare ID: <b>vnfdb_2012_11457</b></td></tr>
<tr><td colspan="2">Combustion parameters:</td></tr>
<tr><td>Lat=39.211553, Lon=64.551444 deg.</td><td>Tavg=1770.27 K, RHsum=3.5908 MW</td></tr>
<tr><td>Freq. detect.=96.20 %</td><td>Area=10.13 m2</td></tr>
<tr><td>BCM=0.0984</td><td>Type: upstream</td></tr>
</table>]]></description><Point>
<coordinates>64.551444,39.211553,0</coordinates>
</Point>
</Placemark>
<Placemark>
<Style id="highlightPlacemark333">
<IconStyle>
<scale>0.75</scale>
<Icon>
<href>http://maps.google.com/mapfiles/ms/micons/red.png</href>
</Icon>
</IconStyle>
<LabelStyle>
<scale>0</scale>
</LabelStyle>
</Style>
<name>Rank 333</name>
<description><![CDATA[  <table width="500">
<tr><td>Country: <b>RUS</b></td><td>Flare ID: <b>vnfdb_2012_07339</b></td></tr>
<tr><td colspan="2">Combustion parameters:</td></tr>
<tr><td>Lat=52.221873, Lon=51.836220 deg.</td><td>Tavg=1744.33 K, RHsum=3.57867 MW</td></tr>
<tr><td>Freq. detect.=80.64 %</td><td>Area=17.73 m2</td></tr>
<tr><td>BCM=0.0981</td><td>Type: upstream</td></tr>
</table>]]></description><Point>
<coordinates>51.836220,52.221873,0</coordinates>
</Point>
</Placemark>
<Placemark>
<Style id="highlightPlacemark334">
<IconStyle>
<scale>0.75</scale>
<Icon>
<href>http://maps.google.com/mapfiles/kml/shapes/gas_stations.png</href>
</Icon>
</IconStyle>
<LabelStyle>
<scale>0</scale>
</LabelStyle>
</Style>
<name>Rank 334</name>
<description><![CDATA[  <table width="500">
<tr><td>Country: <b>VEN</b></td><td>Flare ID: <b>vnfdb_2012_05898</b></td></tr>
<tr><td colspan="2">Combustion parameters:</td></tr>
<tr><td>Lat=11.739383, Lon=-70.198283 deg.</td><td>Tavg=1476.14 K, RHsum=3.57804 MW</td></tr>
<tr><td>Freq. detect.=99.23 %</td><td>Area=35.38 m2</td></tr>
<tr><td>BCM=0.098</td><td>Type: downstream</td></tr>
</table>]]></description><Point>
<coordinates>-70.198283,11.739383,0</coordinates>
</Point>
</Placemark>
<Placemark>
<Style id="highlightPlacemark335">
<IconStyle>
<scale>0.75</scale>
<Icon>
<href>http://maps.google.com/mapfiles/ms/micons/red.png</href>
</Icon>
</IconStyle>
<LabelStyle>
<scale>0</scale>
</LabelStyle>
</Style>
<name>Rank 335</name>
<description><![CDATA[  <table width="500">
<tr><td>Country: <b>CHN</b></td><td>Flare ID: <b>vnfdb_2012_12743</b></td></tr>
<tr><td colspan="2">Combustion parameters:</td></tr>
<tr><td>Lat=40.243951, Lon=121.023807 deg.</td><td>Tavg=1671.24 K, RHsum=3.57068 MW</td></tr>
<tr><td>Freq. detect.=93.63 %</td><td>Area=17.41 m2</td></tr>
<tr><td>BCM=0.0978</td><td>Type: upstream</td></tr>
</table>]]></description><Point>
<coordinates>121.023807,40.243951,0</coordinates>
</Point>
</Placemark>
<Placemark>
<Style id="highlightPlacemark336">
<IconStyle>
<scale>0.75</scale>
<Icon>
<href>http://maps.google.com/mapfiles/ms/micons/red.png</href>
</Icon>
</IconStyle>
<LabelStyle>
<scale>0</scale>
</LabelStyle>
</Style>
<name>Rank 336</name>
<description><![CDATA[  <table width="500">
<tr><td>Country: <b>RUS</b></td><td>Flare ID: <b>vnfdb_2012_10360</b></td></tr>
<tr><td colspan="2">Combustion parameters:</td></tr>
<tr><td>Lat=60.852467, Lon=70.071178 deg.</td><td>Tavg=1808.62 K, RHsum=3.56915 MW</td></tr>
<tr><td>Freq. detect.=85.53 %</td><td>Area=13.00 m2</td></tr>
<tr><td>BCM=0.0978</td><td>Type: upstream</td></tr>
</table>]]></description><Point>
<coordinates>70.071178,60.852467,0</coordinates>
</Point>
</Placemark>
<Placemark>
<Style id="highlightPlacemark337">
<IconStyle>
<scale>0.75</scale>
<Icon>
<href>http://maps.google.com/mapfiles/ms/micons/red.png</href>
</Icon>
</IconStyle>
<LabelStyle>
<scale>0</scale>
</LabelStyle>
</Style>
<name>Rank 337</name>
<description><![CDATA[  <table width="500">
<tr><td>Country: <b>IND</b></td><td>Flare ID: <b>vnfdb_2012_11573</b></td></tr>
<tr><td colspan="2">Combustion parameters:</td></tr>
<tr><td>Lat=19.347728, Lon=71.304333 deg.</td><td>Tavg=1631.6 K, RHsum=3.56366 MW</td></tr>
<tr><td>Freq. detect.=94.27 %</td><td>Area=24.27 m2</td></tr>
<tr><td>BCM=0.0976</td><td>Type: upstream</td></tr>
</table>]]></description><Point>
<coordinates>71.304333,19.347728,0</coordinates>
</Point>
</Placemark>
<Placemark>
<Style id="highlightPlacemark338">
<IconStyle>
<scale>0.75</scale>
<Icon>
<href>http://maps.google.com/mapfiles/ms/micons/red.png</href>
</Icon>
</IconStyle>
<LabelStyle>
<scale>0</scale>
</LabelStyle>
</Style>
<name>Rank 338</name>
<description><![CDATA[  <table width="500">
<tr><td>Country: <b>SAU</b></td><td>Flare ID: <b>vnfdb_2012_09055</b></td></tr>
<tr><td colspan="2">Combustion parameters:</td></tr>
<tr><td>Lat=28.369628, Lon=49.627215 deg.</td><td>Tavg=1618.47 K, RHsum=3.55806 MW</td></tr>
<tr><td>Freq. detect.=92.74 %</td><td>Area=27.92 m2</td></tr>
<tr><td>BCM=0.0975</td><td>Type: upstream</td></tr>
</table>]]></description><Point>
<coordinates>49.627215,28.369628,0</coordinates>
</Point>
</Placemark>
<Placemark>
<Style id="highlightPlacemark339">
<IconStyle>
<scale>0.75</scale>
<Icon>
<href>http://maps.google.com/mapfiles/ms/micons/red.png</href>
</Icon>
</IconStyle>
<LabelStyle>
<scale>0</scale>
</LabelStyle>
</Style>
<name>Rank 339</name>
<description><![CDATA[  <table width="500">
<tr><td>Country: <b>IRN</b></td><td>Flare ID: <b>vnfdb_2012_09044</b></td></tr>
<tr><td colspan="2">Combustion parameters:</td></tr>
<tr><td>Lat=29.271038, Lon=49.568938 deg.</td><td>Tavg=1680.91 K, RHsum=3.54797 MW</td></tr>
<tr><td>Freq. detect.=70.72 %</td><td>Area=20.41 m2</td></tr>
<tr><td>BCM=0.0972</td><td>Type: upstream</td></tr>
</table>]]></description><Point>
<coordinates>49.568938,29.271038,0</coordinates>
</Point>
</Placemark>
<Placemark>
<Style id="highlightPlacemark340">
<IconStyle>
<scale>0.75</scale>
<Icon>
<href>http://maps.google.com/mapfiles/ms/micons/red.png</href>
</Icon>
</IconStyle>
<LabelStyle>
<scale>0</scale>
</LabelStyle>
</Style>
<name>Rank 340</name>
<description><![CDATA[  <table width="500">
<tr><td>Country: <b>DZA</b></td><td>Flare ID: <b>vnfdb_2012_08003</b></td></tr>
<tr><td colspan="2">Combustion parameters:</td></tr>
<tr><td>Lat=28.638026, Lon=7.614899 deg.</td><td>Tavg=1640.87 K, RHsum=3.53007 MW</td></tr>
<tr><td>Freq. detect.=95.31 %</td><td>Area=20.30 m2</td></tr>
<tr><td>BCM=0.0967</td><td>Type: upstream</td></tr>
</table>]]></description><Point>
<coordinates>7.614899,28.638026,0</coordinates>
</Point>
</Placemark>
<Placemark>
<Style id="highlightPlacemark341">
<IconStyle>
<scale>0.75</scale>
<Icon>
<href>http://maps.google.com/mapfiles/ms/micons/red.png</href>
</Icon>
</IconStyle>
<LabelStyle>
<scale>0</scale>
</LabelStyle>
</Style>
<name>Rank 341</name>
<description><![CDATA[  <table width="500">
<tr><td>Country: <b>TKM</b></td><td>Flare ID: <b>vnfdb_2012_09366</b></td></tr>
<tr><td colspan="2">Combustion parameters:</td></tr>
<tr><td>Lat=38.852435, Lon=54.236708 deg.</td><td>Tavg=1734.73 K, RHsum=3.52875 MW</td></tr>
<tr><td>Freq. detect.=92.26 %</td><td>Area=15.08 m2</td></tr>
<tr><td>BCM=0.0967</td><td>Type: upstream</td></tr>
</table>]]></description><Point>
<coordinates>54.236708,38.852435,0</coordinates>
</Point>
</Placemark>
<Placemark>
<Style id="highlightPlacemark342">
<IconStyle>
<scale>0.75</scale>
<Icon>
<href>http://maps.google.com/mapfiles/ms/micons/red.png</href>
</Icon>
</IconStyle>
<LabelStyle>
<scale>0</scale>
</LabelStyle>
</Style>
<name>Rank 342</name>
<description><![CDATA[  <table width="500">
<tr><td>Country: <b>IRN</b></td><td>Flare ID: <b>vnfdb_2012_08908</b></td></tr>
<tr><td colspan="2">Combustion parameters:</td></tr>
<tr><td>Lat=32.065192, Lon=49.096831 deg.</td><td>Tavg=1647.89 K, RHsum=3.52325 MW</td></tr>
<tr><td>Freq. detect.=71.11 %</td><td>Area=22.53 m2</td></tr>
<tr><td>BCM=0.0965</td><td>Type: upstream</td></tr>
</table>]]></description><Point>
<coordinates>49.096831,32.065192,0</coordinates>
</Point>
</Placemark>
<Placemark>
<Style id="highlightPlacemark343">
<IconStyle>
<scale>0.75</scale>
<Icon>
<href>http://maps.google.com/mapfiles/ms/micons/red.png</href>
</Icon>
</IconStyle>
<LabelStyle>
<scale>0</scale>
</LabelStyle>
</Style>
<name>Rank 343</name>
<description><![CDATA[  <table width="500">
<tr><td>Country: <b>VEN</b></td><td>Flare ID: <b>vnfdb_2012_05976</b></td></tr>
<tr><td colspan="2">Combustion parameters:</td></tr>
<tr><td>Lat=9.565206, Lon=-63.631399 deg.</td><td>Tavg=1726.31 K, RHsum=3.50046 MW</td></tr>
<tr><td>Freq. detect.=97.42 %</td><td>Area=15.34 m2</td></tr>
<tr><td>BCM=0.0959</td><td>Type: upstream</td></tr>
</table>]]></description><Point>
<coordinates>-63.631399,9.565206,0</coordinates>
</Point>
</Placemark>
<Placemark>
<Style id="highlightPlacemark344">
<IconStyle>
<scale>0.75</scale>
<Icon>
<href>http://maps.google.com/mapfiles/kml/shapes/gas_stations.png</href>
</Icon>
</IconStyle>
<LabelStyle>
<scale>0</scale>
</LabelStyle>
</Style>
<name>Rank 344</name>
<description><![CDATA[  <table width="500">
<tr><td>Country: <b>MYS</b></td><td>Flare ID: <b>vnfdb_2012_12663</b></td></tr>
<tr><td colspan="2">Combustion parameters:</td></tr>
<tr><td>Lat=3.286587, Lon=113.081484 deg.</td><td>Tavg=1566.42 K, RHsum=3.49485 MW</td></tr>
<tr><td>Freq. detect.=87.50 %</td><td>Area=30.91 m2</td></tr>
<tr><td>BCM=0.0958</td><td>Type: downstream</td></tr>
</table>]]></description><Point>
<coordinates>113.081484,3.286587,0</coordinates>
</Point>
</Placemark>
<Placemark>
<Style id="highlightPlacemark345">
<IconStyle>
<scale>0.75</scale>
<Icon>
<href>http://maps.google.com/mapfiles/ms/micons/red.png</href>
</Icon>
</IconStyle>
<LabelStyle>
<scale>0</scale>
</LabelStyle>
</Style>
<name>Rank 345</name>
<description><![CDATA[  <table width="500">
<tr><td>Country: <b>NGA</b></td><td>Flare ID: <b>vnfdb_2012_07852</b></td></tr>
<tr><td colspan="2">Combustion parameters:</td></tr>
<tr><td>Lat=6.013851, Lon=5.865305 deg.</td><td>Tavg=1709.84 K, RHsum=3.49406 MW</td></tr>
<tr><td>Freq. detect.=87.41 %</td><td>Area=17.78 m2</td></tr>
<tr><td>BCM=0.0957</td><td>Type: upstream</td></tr>
</table>]]></description><Point>
<coordinates>5.865305,6.013851,0</coordinates>
</Point>
</Placemark>
<Placemark>
<Style id="highlightPlacemark346">
<IconStyle>
<scale>0.75</scale>
<Icon>
<href>http://maps.google.com/mapfiles/ms/micons/red.png</href>
</Icon>
</IconStyle>
<LabelStyle>
<scale>0</scale>
</LabelStyle>
</Style>
<name>Rank 346</name>
<description><![CDATA[  <table width="500">
<tr><td>Country: <b>DZA</b></td><td>Flare ID: <b>vnfdb_2012_08042</b></td></tr>
<tr><td colspan="2">Combustion parameters:</td></tr>
<tr><td>Lat=28.526288, Lon=9.121594 deg.</td><td>Tavg=1679.99 K, RHsum=3.49328 MW</td></tr>
<tr><td>Freq. detect.=88.26 %</td><td>Area=17.60 m2</td></tr>
<tr><td>BCM=0.0957</td><td>Type: upstream</td></tr>
</table>]]></description><Point>
<coordinates>9.121594,28.526288,0</coordinates>
</Point>
</Placemark>
<Placemark>
<Style id="highlightPlacemark347">
<IconStyle>
<scale>0.75</scale>
<Icon>
<href>http://maps.google.com/mapfiles/ms/micons/red.png</href>
</Icon>
</IconStyle>
<LabelStyle>
<scale>0</scale>
</LabelStyle>
</Style>
<name>Rank 347</name>
<description><![CDATA[  <table width="500">
<tr><td>Country: <b>RUS</b></td><td>Flare ID: <b>vnfdb_2012_10910</b></td></tr>
<tr><td colspan="2">Combustion parameters:</td></tr>
<tr><td>Lat=61.024654, Lon=78.711963 deg.</td><td>Tavg=1752.44 K, RHsum=3.4806 MW</td></tr>
<tr><td>Freq. detect.=84.51 %</td><td>Area=12.95 m2</td></tr>
<tr><td>BCM=0.0954</td><td>Type: upstream</td></tr>
</table>]]></description><Point>
<coordinates>78.711963,61.024654,0</coordinates>
</Point>
</Placemark>
<Placemark>
<Style id="highlightPlacemark348">
<IconStyle>
<scale>0.75</scale>
<Icon>
<href>http://maps.google.com/mapfiles/kml/shapes/gas_stations.png</href>
</Icon>
</IconStyle>
<LabelStyle>
<scale>0</scale>
</LabelStyle>
</Style>
<name>Rank 348</name>
<description><![CDATA[  <table width="500">
<tr><td>Country: <b>TTO</b></td><td>Flare ID: <b>vnfdb_2012_06027</b></td></tr>
<tr><td colspan="2">Combustion parameters:</td></tr>
<tr><td>Lat=10.314356, Lon=-61.447670 deg.</td><td>Tavg=1719.23 K, RHsum=3.47005 MW</td></tr>
<tr><td>Freq. detect.=97.29 %</td><td>Area=14.21 m2</td></tr>
<tr><td>BCM=0.0951</td><td>Type: downstream</td></tr>
</table>]]></description><Point>
<coordinates>-61.447670,10.314356,0</coordinates>
</Point>
</Placemark>
<Placemark>
<Style id="highlightPlacemark349">
<IconStyle>
<scale>0.75</scale>
<Icon>
<href>http://maps.google.com/mapfiles/ms/micons/red.png</href>
</Icon>
</IconStyle>
<LabelStyle>
<scale>0</scale>
</LabelStyle>
</Style>
<name>Rank 349</name>
<description><![CDATA[  <table width="500">
<tr><td>Country: <b>GAB</b></td><td>Flare ID: <b>vnfdb_2012_09812</b></td></tr>
<tr><td colspan="2">Combustion parameters:</td></tr>
<tr><td>Lat=-1.587881, Lon=9.973358 deg.</td><td>Tavg=1564.94 K, RHsum=3.46994 MW</td></tr>
<tr><td>Freq. detect.=89.57 %</td><td>Area=28.02 m2</td></tr>
<tr><td>BCM=0.0951</td><td>Type: upstream</td></tr>
</table>]]></description><Point>
<coordinates>9.973358,-1.587881,0</coordinates>
</Point>
</Placemark>
<Placemark>
<Style id="highlightPlacemark350">
<IconStyle>
<scale>0.75</scale>
<Icon>
<href>http://maps.google.com/mapfiles/ms/micons/red.png</href>
</Icon>
</IconStyle>
<LabelStyle>
<scale>0</scale>
</LabelStyle>
</Style>
<name>Rank 350</name>
<description><![CDATA[  <table width="500">
<tr><td>Country: <b>RUS</b></td><td>Flare ID: <b>vnfdb_2012_10987</b></td></tr>
<tr><td colspan="2">Combustion parameters:</td></tr>
<tr><td>Lat=63.447113, Lon=80.993323 deg.</td><td>Tavg=1816.02 K, RHsum=3.46856 MW</td></tr>
<tr><td>Freq. detect.=76.84 %</td><td>Area=13.00 m2</td></tr>
<tr><td>BCM=0.095</td><td>Type: upstream</td></tr>
</table>]]></description><Point>
<coordinates>80.993323,63.447113,0</coordinates>
</Point>
</Placemark>
<Placemark>
<Style id="highlightPlacemark351">
<IconStyle>
<scale>0.75</scale>
<Icon>
<href>http://maps.google.com/mapfiles/ms/micons/red.png</href>
</Icon>
</IconStyle>
<LabelStyle>
<scale>0</scale>
</LabelStyle>
</Style>
<name>Rank 351</name>
<description><![CDATA[  <table width="500">
<tr><td>Country: <b>DZA</b></td><td>Flare ID: <b>vnfdb_2012_07875</b></td></tr>
<tr><td colspan="2">Combustion parameters:</td></tr>
<tr><td>Lat=31.646622, Lon=5.991718 deg.</td><td>Tavg=1630.2 K, RHsum=3.45726 MW</td></tr>
<tr><td>Freq. detect.=96.96 %</td><td>Area=22.57 m2</td></tr>
<tr><td>BCM=0.0947</td><td>Type: upstream</td></tr>
</table>]]></description><Point>
<coordinates>5.991718,31.646622,0</coordinates>
</Point>
</Placemark>
<Placemark>
<Style id="highlightPlacemark352">
<IconStyle>
<scale>0.75</scale>
<Icon>
<href>http://maps.google.com/mapfiles/ms/micons/red.png</href>
</Icon>
</IconStyle>
<LabelStyle>
<scale>0</scale>
</LabelStyle>
</Style>
<name>Rank 352</name>
<description><![CDATA[  <table width="500">
<tr><td>Country: <b>IRQ</b></td><td>Flare ID: <b>vnfdb_2012_08694</b></td></tr>
<tr><td colspan="2">Combustion parameters:</td></tr>
<tr><td>Lat=30.314970, Lon=47.347859 deg.</td><td>Tavg=1630.38 K, RHsum=3.43204 MW</td></tr>
<tr><td>Freq. detect.=97.16 %</td><td>Area=18.57 m2</td></tr>
<tr><td>BCM=0.094</td><td>Type: upstream</td></tr>
</table>]]></description><Point>
<coordinates>47.347859,30.314970,0</coordinates>
</Point>
</Placemark>
<Placemark>
<Style id="highlightPlacemark353">
<IconStyle>
<scale>0.75</scale>
<Icon>
<href>http://maps.google.com/mapfiles/ms/micons/red.png</href>
</Icon>
</IconStyle>
<LabelStyle>
<scale>0</scale>
</LabelStyle>
</Style>
<name>Rank 353</name>
<description><![CDATA[  <table width="500">
<tr><td>Country: <b>VEN</b></td><td>Flare ID: <b>vnfdb_2012_06004</b></td></tr>
<tr><td colspan="2">Combustion parameters:</td></tr>
<tr><td>Lat=9.977747, Lon=-63.182143 deg.</td><td>Tavg=1632.05 K, RHsum=3.425 MW</td></tr>
<tr><td>Freq. detect.=93.28 %</td><td>Area=18.67 m2</td></tr>
<tr><td>BCM=0.0938</td><td>Type: upstream</td></tr>
</table>]]></description><Point>
<coordinates>-63.182143,9.977747,0</coordinates>
</Point>
</Placemark>
<Placemark>
<Style id="highlightPlacemark354">
<IconStyle>
<scale>0.75</scale>
<Icon>
<href>http://maps.google.com/mapfiles/ms/micons/red.png</href>
</Icon>
</IconStyle>
<LabelStyle>
<scale>0</scale>
</LabelStyle>
</Style>
<name>Rank 354</name>
<description><![CDATA[  <table width="500">
<tr><td>Country: <b>RUS</b></td><td>Flare ID: <b>vnfdb_2012_10520</b></td></tr>
<tr><td colspan="2">Combustion parameters:</td></tr>
<tr><td>Lat=60.579054, Lon=74.556565 deg.</td><td>Tavg=1765.2 K, RHsum=3.40806 MW</td></tr>
<tr><td>Freq. detect.=87.60 %</td><td>Area=14.08 m2</td></tr>
<tr><td>BCM=0.0934</td><td>Type: upstream</td></tr>
</table>]]></description><Point>
<coordinates>74.556565,60.579054,0</coordinates>
</Point>
</Placemark>
<Placemark>
<Style id="highlightPlacemark355">
<IconStyle>
<scale>0.75</scale>
<Icon>
<href>http://maps.google.com/mapfiles/ms/micons/red.png</href>
</Icon>
</IconStyle>
<LabelStyle>
<scale>0</scale>
</LabelStyle>
</Style>
<name>Rank 355</name>
<description><![CDATA[  <table width="500">
<tr><td>Country: <b>AGO</b></td><td>Flare ID: <b>vnfdb_2012_09861</b></td></tr>
<tr><td colspan="2">Combustion parameters:</td></tr>
<tr><td>Lat=-5.655883, Lon=11.809150 deg.</td><td>Tavg=1699.19 K, RHsum=3.39326 MW</td></tr>
<tr><td>Freq. detect.=89.76 %</td><td>Area=24.82 m2</td></tr>
<tr><td>BCM=0.093</td><td>Type: upstream</td></tr>
</table>]]></description><Point>
<coordinates>11.809150,-5.655883,0</coordinates>
</Point>
</Placemark>
<Placemark>
<Style id="highlightPlacemark356">
<IconStyle>
<scale>0.75</scale>
<Icon>
<href>http://maps.google.com/mapfiles/ms/micons/red.png</href>
</Icon>
</IconStyle>
<LabelStyle>
<scale>0</scale>
</LabelStyle>
</Style>
<name>Rank 356</name>
<description><![CDATA[  <table width="500">
<tr><td>Country: <b>BRA</b></td><td>Flare ID: <b>vnfdb_2012_06651</b></td></tr>
<tr><td colspan="2">Combustion parameters:</td></tr>
<tr><td>Lat=-22.422489, Lon=-39.957968 deg.</td><td>Tavg=1619.66 K, RHsum=3.39316 MW</td></tr>
<tr><td>Freq. detect.=82.04 %</td><td>Area=27.01 m2</td></tr>
<tr><td>BCM=0.093</td><td>Type: upstream</td></tr>
</table>]]></description><Point>
<coordinates>-39.957968,-22.422489,0</coordinates>
</Point>
</Placemark>
<Placemark>
<Style id="highlightPlacemark357">
<IconStyle>
<scale>0.75</scale>
<Icon>
<href>http://maps.google.com/mapfiles/kml/shapes/gas_stations.png</href>
</Icon>
</IconStyle>
<LabelStyle>
<scale>0</scale>
</LabelStyle>
</Style>
<name>Rank 357</name>
<description><![CDATA[  <table width="500">
<tr><td>Country: <b>VEN</b></td><td>Flare ID: <b>vnfdb_2012_05917</b></td></tr>
<tr><td colspan="2">Combustion parameters:</td></tr>
<tr><td>Lat=10.056037, Lon=-64.859850 deg.</td><td>Tavg=1582.78 K, RHsum=3.38835 MW</td></tr>
<tr><td>Freq. detect.=97.77 %</td><td>Area=24.09 m2</td></tr>
<tr><td>BCM=0.0928</td><td>Type: downstream</td></tr>
</table>]]></description><Point>
<coordinates>-64.859850,10.056037,0</coordinates>
</Point>
</Placemark>
<Placemark>
<Style id="highlightPlacemark358">
<IconStyle>
<scale>0.75</scale>
<Icon>
<href>http://maps.google.com/mapfiles/ms/micons/red.png</href>
</Icon>
</IconStyle>
<LabelStyle>
<scale>0</scale>
</LabelStyle>
</Style>
<name>Rank 358</name>
<description><![CDATA[  <table width="500">
<tr><td>Country: <b>VEN</b></td><td>Flare ID: <b>vnfdb_2012_05948</b></td></tr>
<tr><td colspan="2">Combustion parameters:</td></tr>
<tr><td>Lat=9.274544, Lon=-64.044214 deg.</td><td>Tavg=1703.33 K, RHsum=3.38831 MW</td></tr>
<tr><td>Freq. detect.=89.93 %</td><td>Area=17.58 m2</td></tr>
<tr><td>BCM=0.0928</td><td>Type: upstream</td></tr>
</table>]]></description><Point>
<coordinates>-64.044214,9.274544,0</coordinates>
</Point>
</Placemark>
<Placemark>
<Style id="highlightPlacemark359">
<IconStyle>
<scale>0.75</scale>
<Icon>
<href>http://maps.google.com/mapfiles/ms/micons/red.png</href>
</Icon>
</IconStyle>
<LabelStyle>
<scale>0</scale>
</LabelStyle>
</Style>
<name>Rank 359</name>
<description><![CDATA[  <table width="500">
<tr><td>Country: <b>IRN</b></td><td>Flare ID: <b>vnfdb_2012_09135</b></td></tr>
<tr><td colspan="2">Combustion parameters:</td></tr>
<tr><td>Lat=30.481914, Lon=50.485538 deg.</td><td>Tavg=1610.69 K, RHsum=3.38817 MW</td></tr>
<tr><td>Freq. detect.=96.98 %</td><td>Area=20.95 m2</td></tr>
<tr><td>BCM=0.0928</td><td>Type: upstream</td></tr>
</table>]]></description><Point>
<coordinates>50.485538,30.481914,0</coordinates>
</Point>
</Placemark>
<Placemark>
<Style id="highlightPlacemark360">
<IconStyle>
<scale>0.75</scale>
<Icon>
<href>http://maps.google.com/mapfiles/ms/micons/red.png</href>
</Icon>
</IconStyle>
<LabelStyle>
<scale>0</scale>
</LabelStyle>
</Style>
<name>Rank 360</name>
<description><![CDATA[  <table width="500">
<tr><td>Country: <b>RUS</b></td><td>Flare ID: <b>vnfdb_2012_10705</b></td></tr>
<tr><td colspan="2">Combustion parameters:</td></tr>
<tr><td>Lat=64.686330, Lon=76.727527 deg.</td><td>Tavg=1774.38 K, RHsum=3.37607 MW</td></tr>
<tr><td>Freq. detect.=82.73 %</td><td>Area=10.68 m2</td></tr>
<tr><td>BCM=0.0925</td><td>Type: upstream</td></tr>
</table>]]></description><Point>
<coordinates>76.727527,64.686330,0</coordinates>
</Point>
</Placemark>
<Placemark>
<Style id="highlightPlacemark361">
<IconStyle>
<scale>0.75</scale>
<Icon>
<href>http://maps.google.com/mapfiles/ms/micons/red.png</href>
</Icon>
</IconStyle>
<LabelStyle>
<scale>0</scale>
</LabelStyle>
</Style>
<name>Rank 361</name>
<description><![CDATA[  <table width="500">
<tr><td>Country: <b>DZA</b></td><td>Flare ID: <b>vnfdb_2012_08039</b></td></tr>
<tr><td colspan="2">Combustion parameters:</td></tr>
<tr><td>Lat=28.466939, Lon=9.055534 deg.</td><td>Tavg=1664.77 K, RHsum=3.36885 MW</td></tr>
<tr><td>Freq. detect.=97.34 %</td><td>Area=16.71 m2</td></tr>
<tr><td>BCM=0.0923</td><td>Type: upstream</td></tr>
</table>]]></description><Point>
<coordinates>9.055534,28.466939,0</coordinates>
</Point>
</Placemark>
<Placemark>
<Style id="highlightPlacemark362">
<IconStyle>
<scale>0.75</scale>
<Icon>
<href>http://maps.google.com/mapfiles/ms/micons/red.png</href>
</Icon>
</IconStyle>
<LabelStyle>
<scale>0</scale>
</LabelStyle>
</Style>
<name>Rank 362</name>
<description><![CDATA[  <table width="500">
<tr><td>Country: <b>IRN</b></td><td>Flare ID: <b>vnfdb_2012_09370</b></td></tr>
<tr><td colspan="2">Combustion parameters:</td></tr>
<tr><td>Lat=25.703200, Lon=54.300895 deg.</td><td>Tavg=1630.18 K, RHsum=3.35005 MW</td></tr>
<tr><td>Freq. detect.=88.93 %</td><td>Area=20.12 m2</td></tr>
<tr><td>BCM=0.0918</td><td>Type: upstream</td></tr>
</table>]]></description><Point>
<coordinates>54.300895,25.703200,0</coordinates>
</Point>
</Placemark>
<Placemark>
<Style id="highlightPlacemark363">
<IconStyle>
<scale>0.75</scale>
<Icon>
<href>http://maps.google.com/mapfiles/ms/micons/red.png</href>
</Icon>
</IconStyle>
<LabelStyle>
<scale>0</scale>
</LabelStyle>
</Style>
<name>Rank 363</name>
<description><![CDATA[  <table width="500">
<tr><td>Country: <b>NGA</b></td><td>Flare ID: <b>vnfdb_2012_07949</b></td></tr>
<tr><td colspan="2">Combustion parameters:</td></tr>
<tr><td>Lat=5.240184, Lon=6.624663 deg.</td><td>Tavg=1760.94 K, RHsum=3.34579 MW</td></tr>
<tr><td>Freq. detect.=97.67 %</td><td>Area=12.74 m2</td></tr>
<tr><td>BCM=0.0917</td><td>Type: upstream</td></tr>
</table>]]></description><Point>
<coordinates>6.624663,5.240184,0</coordinates>
</Point>
</Placemark>
<Placemark>
<Style id="highlightPlacemark364">
<IconStyle>
<scale>0.75</scale>
<Icon>
<href>http://maps.google.com/mapfiles/ms/micons/red.png</href>
</Icon>
</IconStyle>
<LabelStyle>
<scale>0</scale>
</LabelStyle>
</Style>
<name>Rank 364</name>
<description><![CDATA[  <table width="500">
<tr><td>Country: <b>COG</b></td><td>Flare ID: <b>vnfdb_2012_09839</b></td></tr>
<tr><td colspan="2">Combustion parameters:</td></tr>
<tr><td>Lat=-5.378446, Lon=11.442833 deg.</td><td>Tavg=1646.3 K, RHsum=3.34362 MW</td></tr>
<tr><td>Freq. detect.=92.16 %</td><td>Area=16.49 m2</td></tr>
<tr><td>BCM=0.0916</td><td>Type: upstream</td></tr>
</table>]]></description><Point>
<coordinates>11.442833,-5.378446,0</coordinates>
</Point>
</Placemark>
<Placemark>
<Style id="highlightPlacemark365">
<IconStyle>
<scale>0.75</scale>
<Icon>
<href>http://maps.google.com/mapfiles/ms/micons/red.png</href>
</Icon>
</IconStyle>
<LabelStyle>
<scale>0</scale>
</LabelStyle>
</Style>
<name>Rank 365</name>
<description><![CDATA[  <table width="500">
<tr><td>Country: <b>IRQ</b></td><td>Flare ID: <b>vnfdb_2012_08609</b></td></tr>
<tr><td colspan="2">Combustion parameters:</td></tr>
<tr><td>Lat=35.247682, Lon=44.430132 deg.</td><td>Tavg=1707.92 K, RHsum=3.34266 MW</td></tr>
<tr><td>Freq. detect.=96.46 %</td><td>Area=14.73 m2</td></tr>
<tr><td>BCM=0.0916</td><td>Type: upstream</td></tr>
</table>]]></description><Point>
<coordinates>44.430132,35.247682,0</coordinates>
</Point>
</Placemark>
<Placemark>
<Style id="highlightPlacemark366">
<IconStyle>
<scale>0.75</scale>
<Icon>
<href>http://maps.google.com/mapfiles/ms/micons/red.png</href>
</Icon>
</IconStyle>
<LabelStyle>
<scale>0</scale>
</LabelStyle>
</Style>
<name>Rank 366</name>
<description><![CDATA[  <table width="500">
<tr><td>Country: <b>TKM</b></td><td>Flare ID: <b>vnfdb_2012_09290</b></td></tr>
<tr><td colspan="2">Combustion parameters:</td></tr>
<tr><td>Lat=39.472895, Lon=52.714105 deg.</td><td>Tavg=1796.38 K, RHsum=3.3423 MW</td></tr>
<tr><td>Freq. detect.=85.89 %</td><td>Area=12.85 m2</td></tr>
<tr><td>BCM=0.0916</td><td>Type: upstream</td></tr>
</table>]]></description><Point>
<coordinates>52.714105,39.472895,0</coordinates>
</Point>
</Placemark>
<Placemark>
<Style id="highlightPlacemark367">
<IconStyle>
<scale>0.75</scale>
<Icon>
<href>http://maps.google.com/mapfiles/ms/micons/red.png</href>
</Icon>
</IconStyle>
<LabelStyle>
<scale>0</scale>
</LabelStyle>
</Style>
<name>Rank 367</name>
<description><![CDATA[  <table width="500">
<tr><td>Country: <b>DZA</b></td><td>Flare ID: <b>vnfdb_2012_07701</b></td></tr>
<tr><td colspan="2">Combustion parameters:</td></tr>
<tr><td>Lat=32.746201, Lon=3.182236 deg.</td><td>Tavg=1652 K, RHsum=3.32059 MW</td></tr>
<tr><td>Freq. detect.=97.92 %</td><td>Area=19.46 m2</td></tr>
<tr><td>BCM=0.091</td><td>Type: upstream</td></tr>
</table>]]></description><Point>
<coordinates>3.182236,32.746201,0</coordinates>
</Point>
</Placemark>
<Placemark>
<Style id="highlightPlacemark368">
<IconStyle>
<scale>0.75</scale>
<Icon>
<href>http://maps.google.com/mapfiles/ms/micons/red.png</href>
</Icon>
</IconStyle>
<LabelStyle>
<scale>0</scale>
</LabelStyle>
</Style>
<name>Rank 368</name>
<description><![CDATA[  <table width="500">
<tr><td>Country: <b>TKM</b></td><td>Flare ID: <b>vnfdb_2012_09344</b></td></tr>
<tr><td colspan="2">Combustion parameters:</td></tr>
<tr><td>Lat=37.768450, Lon=53.915430 deg.</td><td>Tavg=1748.27 K, RHsum=3.31948 MW</td></tr>
<tr><td>Freq. detect.=93.25 %</td><td>Area=12.26 m2</td></tr>
<tr><td>BCM=0.091</td><td>Type: upstream</td></tr>
</table>]]></description><Point>
<coordinates>53.915430,37.768450,0</coordinates>
</Point>
</Placemark>
<Placemark>
<Style id="highlightPlacemark369">
<IconStyle>
<scale>0.75</scale>
<Icon>
<href>http://maps.google.com/mapfiles/ms/micons/red.png</href>
</Icon>
</IconStyle>
<LabelStyle>
<scale>0</scale>
</LabelStyle>
</Style>
<name>Rank 369</name>
<description><![CDATA[  <table width="500">
<tr><td>Country: <b>NGA</b></td><td>Flare ID: <b>vnfdb_2012_09528</b></td></tr>
<tr><td colspan="2">Combustion parameters:</td></tr>
<tr><td>Lat=4.327557, Lon=5.820659 deg.</td><td>Tavg=1608.11 K, RHsum=3.30307 MW</td></tr>
<tr><td>Freq. detect.=93.78 %</td><td>Area=19.68 m2</td></tr>
<tr><td>BCM=0.0905</td><td>Type: upstream</td></tr>
</table>]]></description><Point>
<coordinates>5.820659,4.327557,0</coordinates>
</Point>
</Placemark>
<Placemark>
<Style id="highlightPlacemark370">
<IconStyle>
<scale>0.75</scale>
<Icon>
<href>http://maps.google.com/mapfiles/ms/micons/red.png</href>
</Icon>
</IconStyle>
<LabelStyle>
<scale>0</scale>
</LabelStyle>
</Style>
<name>Rank 370</name>
<description><![CDATA[  <table width="500">
<tr><td>Country: <b>LBY</b></td><td>Flare ID: <b>vnfdb_2012_08126</b></td></tr>
<tr><td colspan="2">Combustion parameters:</td></tr>
<tr><td>Lat=26.433964, Lon=11.849371 deg.</td><td>Tavg=1677.35 K, RHsum=3.28754 MW</td></tr>
<tr><td>Freq. detect.=91.97 %</td><td>Area=15.19 m2</td></tr>
<tr><td>BCM=0.0901</td><td>Type: upstream</td></tr>
</table>]]></description><Point>
<coordinates>11.849371,26.433964,0</coordinates>
</Point>
</Placemark>
<Placemark>
<Style id="highlightPlacemark371">
<IconStyle>
<scale>0.75</scale>
<Icon>
<href>http://maps.google.com/mapfiles/ms/micons/red.png</href>
</Icon>
</IconStyle>
<LabelStyle>
<scale>0</scale>
</LabelStyle>
</Style>
<name>Rank 371</name>
<description><![CDATA[  <table width="500">
<tr><td>Country: <b>CMR</b></td><td>Flare ID: <b>vnfdb_2012_09736</b></td></tr>
<tr><td colspan="2">Combustion parameters:</td></tr>
<tr><td>Lat=4.275573, Lon=8.417702 deg.</td><td>Tavg=1617.29 K, RHsum=3.28186 MW</td></tr>
<tr><td>Freq. detect.=92.86 %</td><td>Area=21.25 m2</td></tr>
<tr><td>BCM=0.0899</td><td>Type: upstream</td></tr>
</table>]]></description><Point>
<coordinates>8.417702,4.275573,0</coordinates>
</Point>
</Placemark>
<Placemark>
<Style id="highlightPlacemark372">
<IconStyle>
<scale>0.75</scale>
<Icon>
<href>http://maps.google.com/mapfiles/ms/micons/red.png</href>
</Icon>
</IconStyle>
<LabelStyle>
<scale>0</scale>
</LabelStyle>
</Style>
<name>Rank 372</name>
<description><![CDATA[  <table width="500">
<tr><td>Country: <b>IRN</b></td><td>Flare ID: <b>vnfdb_2012_09303</b></td></tr>
<tr><td colspan="2">Combustion parameters:</td></tr>
<tr><td>Lat=27.482530, Lon=52.969481 deg.</td><td>Tavg=1698.91 K, RHsum=3.27284 MW</td></tr>
<tr><td>Freq. detect.=95.34 %</td><td>Area=15.62 m2</td></tr>
<tr><td>BCM=0.0897</td><td>Type: upstream</td></tr>
</table>]]></description><Point>
<coordinates>52.969481,27.482530,0</coordinates>
</Point>
</Placemark>
<Placemark>
<Style id="highlightPlacemark373">
<IconStyle>
<scale>0.75</scale>
<Icon>
<href>http://maps.google.com/mapfiles/ms/micons/red.png</href>
</Icon>
</IconStyle>
<LabelStyle>
<scale>0</scale>
</LabelStyle>
</Style>
<name>Rank 373</name>
<description><![CDATA[  <table width="500">
<tr><td>Country: <b>IRQ</b></td><td>Flare ID: <b>vnfdb_2012_08615</b></td></tr>
<tr><td colspan="2">Combustion parameters:</td></tr>
<tr><td>Lat=35.124857, Lon=44.567713 deg.</td><td>Tavg=1663.51 K, RHsum=3.27248 MW</td></tr>
<tr><td>Freq. detect.=94.10 %</td><td>Area=14.89 m2</td></tr>
<tr><td>BCM=0.0897</td><td>Type: upstream</td></tr>
</table>]]></description><Point>
<coordinates>44.567713,35.124857,0</coordinates>
</Point>
</Placemark>
<Placemark>
<Style id="highlightPlacemark374">
<IconStyle>
<scale>0.75</scale>
<Icon>
<href>http://maps.google.com/mapfiles/ms/micons/red.png</href>
</Icon>
</IconStyle>
<LabelStyle>
<scale>0</scale>
</LabelStyle>
</Style>
<name>Rank 374</name>
<description><![CDATA[  <table width="500">
<tr><td>Country: <b>IRQ</b></td><td>Flare ID: <b>vnfdb_2012_08599</b></td></tr>
<tr><td colspan="2">Combustion parameters:</td></tr>
<tr><td>Lat=35.556062, Lon=44.267561 deg.</td><td>Tavg=1677.52 K, RHsum=3.26391 MW</td></tr>
<tr><td>Freq. detect.=94.86 %</td><td>Area=17.15 m2</td></tr>
<tr><td>BCM=0.0894</td><td>Type: upstream</td></tr>
</table>]]></description><Point>
<coordinates>44.267561,35.556062,0</coordinates>
</Point>
</Placemark>
<Placemark>
<Style id="highlightPlacemark375">
<IconStyle>
<scale>0.75</scale>
<Icon>
<href>http://maps.google.com/mapfiles/ms/micons/red.png</href>
</Icon>
</IconStyle>
<LabelStyle>
<scale>0</scale>
</LabelStyle>
</Style>
<name>Rank 375</name>
<description><![CDATA[  <table width="500">
<tr><td>Country: <b>LBY</b></td><td>Flare ID: <b>vnfdb_2012_08230</b></td></tr>
<tr><td colspan="2">Combustion parameters:</td></tr>
<tr><td>Lat=28.712079, Lon=21.452920 deg.</td><td>Tavg=1645.86 K, RHsum=3.25505 MW</td></tr>
<tr><td>Freq. detect.=94.20 %</td><td>Area=17.04 m2</td></tr>
<tr><td>BCM=0.0892</td><td>Type: upstream</td></tr>
</table>]]></description><Point>
<coordinates>21.452920,28.712079,0</coordinates>
</Point>
</Placemark>
<Placemark>
<Style id="highlightPlacemark376">
<IconStyle>
<scale>0.75</scale>
<Icon>
<href>http://maps.google.com/mapfiles/ms/micons/red.png</href>
</Icon>
</IconStyle>
<LabelStyle>
<scale>0</scale>
</LabelStyle>
</Style>
<name>Rank 376</name>
<description><![CDATA[  <table width="500">
<tr><td>Country: <b>RUS</b></td><td>Flare ID: <b>vnfdb_2012_10430</b></td></tr>
<tr><td colspan="2">Combustion parameters:</td></tr>
<tr><td>Lat=60.621706, Lon=72.651213 deg.</td><td>Tavg=1683.57 K, RHsum=3.25394 MW</td></tr>
<tr><td>Freq. detect.=80.68 %</td><td>Area=16.70 m2</td></tr>
<tr><td>BCM=0.0892</td><td>Type: upstream</td></tr>
</table>]]></description><Point>
<coordinates>72.651213,60.621706,0</coordinates>
</Point>
</Placemark>
<Placemark>
<Style id="highlightPlacemark377">
<IconStyle>
<scale>0.75</scale>
<Icon>
<href>http://maps.google.com/mapfiles/ms/micons/red.png</href>
</Icon>
</IconStyle>
<LabelStyle>
<scale>0</scale>
</LabelStyle>
</Style>
<name>Rank 377</name>
<description><![CDATA[  <table width="500">
<tr><td>Country: <b>AGO</b></td><td>Flare ID: <b>vnfdb_2012_09904</b></td></tr>
<tr><td colspan="2">Combustion parameters:</td></tr>
<tr><td>Lat=-7.170856, Lon=12.384849 deg.</td><td>Tavg=1624.16 K, RHsum=3.24952 MW</td></tr>
<tr><td>Freq. detect.=92.62 %</td><td>Area=18.76 m2</td></tr>
<tr><td>BCM=0.089</td><td>Type: upstream</td></tr>
</table>]]></description><Point>
<coordinates>12.384849,-7.170856,0</coordinates>
</Point>
</Placemark>
<Placemark>
<Style id="highlightPlacemark378">
<IconStyle>
<scale>0.75</scale>
<Icon>
<href>http://maps.google.com/mapfiles/ms/micons/red.png</href>
</Icon>
</IconStyle>
<LabelStyle>
<scale>0</scale>
</LabelStyle>
</Style>
<name>Rank 378</name>
<description><![CDATA[  <table width="500">
<tr><td>Country: <b>TUN</b></td><td>Flare ID: <b>vnfdb_2012_08078</b></td></tr>
<tr><td colspan="2">Combustion parameters:</td></tr>
<tr><td>Lat=31.405722, Lon=9.852751 deg.</td><td>Tavg=1673.23 K, RHsum=3.2434 MW</td></tr>
<tr><td>Freq. detect.=96.22 %</td><td>Area=16.47 m2</td></tr>
<tr><td>BCM=0.0889</td><td>Type: upstream</td></tr>
</table>]]></description><Point>
<coordinates>9.852751,31.405722,0</coordinates>
</Point>
</Placemark>
<Placemark>
<Style id="highlightPlacemark379">
<IconStyle>
<scale>0.75</scale>
<Icon>
<href>http://maps.google.com/mapfiles/ms/micons/red.png</href>
</Icon>
</IconStyle>
<LabelStyle>
<scale>0</scale>
</LabelStyle>
</Style>
<name>Rank 379</name>
<description><![CDATA[  <table width="500">
<tr><td>Country: <b>NGA</b></td><td>Flare ID: <b>vnfdb_2012_09519</b></td></tr>
<tr><td colspan="2">Combustion parameters:</td></tr>
<tr><td>Lat=3.466204, Lon=5.560525 deg.</td><td>Tavg=1662.95 K, RHsum=3.24272 MW</td></tr>
<tr><td>Freq. detect.=82.56 %</td><td>Area=24.88 m2</td></tr>
<tr><td>BCM=0.0889</td><td>Type: upstream</td></tr>
</table>]]></description><Point>
<coordinates>5.560525,3.466204,0</coordinates>
</Point>
</Placemark>
<Placemark>
<Style id="highlightPlacemark380">
<IconStyle>
<scale>0.75</scale>
<Icon>
<href>http://maps.google.com/mapfiles/ms/micons/red.png</href>
</Icon>
</IconStyle>
<LabelStyle>
<scale>0</scale>
</LabelStyle>
</Style>
<name>Rank 380</name>
<description><![CDATA[  <table width="500">
<tr><td>Country: <b>MEX</b></td><td>Flare ID: <b>vnfdb_2012_05629</b></td></tr>
<tr><td colspan="2">Combustion parameters:</td></tr>
<tr><td>Lat=19.407395, Lon=-92.213148 deg.</td><td>Tavg=1727.35 K, RHsum=3.24178 MW</td></tr>
<tr><td>Freq. detect.=94.33 %</td><td>Area=13.63 m2</td></tr>
<tr><td>BCM=0.0888</td><td>Type: upstream</td></tr>
</table>]]></description><Point>
<coordinates>-92.213148,19.407395,0</coordinates>
</Point>
</Placemark>
<Placemark>
<Style id="highlightPlacemark381">
<IconStyle>
<scale>0.75</scale>
<Icon>
<href>http://maps.google.com/mapfiles/ms/micons/red.png</href>
</Icon>
</IconStyle>
<LabelStyle>
<scale>0</scale>
</LabelStyle>
</Style>
<name>Rank 381</name>
<description><![CDATA[  <table width="500">
<tr><td>Country: <b>GNQ</b></td><td>Flare ID: <b>vnfdb_2012_09791</b></td></tr>
<tr><td colspan="2">Combustion parameters:</td></tr>
<tr><td>Lat=1.411749, Lon=9.229619 deg.</td><td>Tavg=1642.77 K, RHsum=3.23403 MW</td></tr>
<tr><td>Freq. detect.=98.18 %</td><td>Area=20.80 m2</td></tr>
<tr><td>BCM=0.0886</td><td>Type: upstream</td></tr>
</table>]]></description><Point>
<coordinates>9.229619,1.411749,0</coordinates>
</Point>
</Placemark>
<Placemark>
<Style id="highlightPlacemark382">
<IconStyle>
<scale>0.75</scale>
<Icon>
<href>http://maps.google.com/mapfiles/ms/micons/red.png</href>
</Icon>
</IconStyle>
<LabelStyle>
<scale>0</scale>
</LabelStyle>
</Style>
<name>Rank 382</name>
<description><![CDATA[  <table width="500">
<tr><td>Country: <b>NGA</b></td><td>Flare ID: <b>vnfdb_2012_09568</b></td></tr>
<tr><td colspan="2">Combustion parameters:</td></tr>
<tr><td>Lat=4.527086, Lon=6.631984 deg.</td><td>Tavg=1605.47 K, RHsum=3.20377 MW</td></tr>
<tr><td>Freq. detect.=86.37 %</td><td>Area=21.76 m2</td></tr>
<tr><td>BCM=0.0878</td><td>Type: upstream</td></tr>
</table>]]></description><Point>
<coordinates>6.631984,4.527086,0</coordinates>
</Point>
</Placemark>
<Placemark>
<Style id="highlightPlacemark383">
<IconStyle>
<scale>0.75</scale>
<Icon>
<href>http://maps.google.com/mapfiles/ms/micons/red.png</href>
</Icon>
</IconStyle>
<LabelStyle>
<scale>0</scale>
</LabelStyle>
</Style>
<name>Rank 383</name>
<description><![CDATA[  <table width="500">
<tr><td>Country: <b>RUS</b></td><td>Flare ID: <b>vnfdb_2012_10899</b></td></tr>
<tr><td colspan="2">Combustion parameters:</td></tr>
<tr><td>Lat=58.778401, Lon=78.447063 deg.</td><td>Tavg=1623.9 K, RHsum=3.20249 MW</td></tr>
<tr><td>Freq. detect.=83.69 %</td><td>Area=20.47 m2</td></tr>
<tr><td>BCM=0.0877</td><td>Type: upstream</td></tr>
</table>]]></description><Point>
<coordinates>78.447063,58.778401,0</coordinates>
</Point>
</Placemark>
<Placemark>
<Style id="highlightPlacemark384">
<IconStyle>
<scale>0.75</scale>
<Icon>
<href>http://maps.google.com/mapfiles/ms/micons/red.png</href>
</Icon>
</IconStyle>
<LabelStyle>
<scale>0</scale>
</LabelStyle>
</Style>
<name>Rank 384</name>
<description><![CDATA[  <table width="500">
<tr><td>Country: <b>DZA</b></td><td>Flare ID: <b>vnfdb_2012_07988</b></td></tr>
<tr><td colspan="2">Combustion parameters:</td></tr>
<tr><td>Lat=31.395843, Lon=6.936700 deg.</td><td>Tavg=1594.81 K, RHsum=3.19439 MW</td></tr>
<tr><td>Freq. detect.=85.33 %</td><td>Area=26.58 m2</td></tr>
<tr><td>BCM=0.0875</td><td>Type: upstream</td></tr>
</table>]]></description><Point>
<coordinates>6.936700,31.395843,0</coordinates>
</Point>
</Placemark>
<Placemark>
<Style id="highlightPlacemark385">
<IconStyle>
<scale>0.75</scale>
<Icon>
<href>http://maps.google.com/mapfiles/kml/shapes/gas_stations.png</href>
</Icon>
</IconStyle>
<LabelStyle>
<scale>0</scale>
</LabelStyle>
</Style>
<name>Rank 385</name>
<description><![CDATA[  <table width="500">
<tr><td>Country: <b>IRN</b></td><td>Flare ID: <b>vnfdb_2012_09277</b></td></tr>
<tr><td colspan="2">Combustion parameters:</td></tr>
<tr><td>Lat=27.578832, Lon=52.535183 deg.</td><td>Tavg=1754.94 K, RHsum=3.18961 MW</td></tr>
<tr><td>Freq. detect.=50.28 %</td><td>Area=21.48 m2</td></tr>
<tr><td>BCM=0.0874</td><td>Type: downstream</td></tr>
</table>]]></description><Point>
<coordinates>52.535183,27.578832,0</coordinates>
</Point>
</Placemark>
<Placemark>
<Style id="highlightPlacemark386">
<IconStyle>
<scale>0.75</scale>
<Icon>
<href>http://maps.google.com/mapfiles/ms/micons/red.png</href>
</Icon>
</IconStyle>
<LabelStyle>
<scale>0</scale>
</LabelStyle>
</Style>
<name>Rank 386</name>
<description><![CDATA[  <table width="500">
<tr><td>Country: <b>DZA</b></td><td>Flare ID: <b>vnfdb_2012_07707</b></td></tr>
<tr><td colspan="2">Combustion parameters:</td></tr>
<tr><td>Lat=33.126809, Lon=3.317868 deg.</td><td>Tavg=1688.63 K, RHsum=3.18199 MW</td></tr>
<tr><td>Freq. detect.=94.74 %</td><td>Area=16.45 m2</td></tr>
<tr><td>BCM=0.0872</td><td>Type: upstream</td></tr>
</table>]]></description><Point>
<coordinates>3.317868,33.126809,0</coordinates>
</Point>
</Placemark>
<Placemark>
<Style id="highlightPlacemark387">
<IconStyle>
<scale>0.75</scale>
<Icon>
<href>http://maps.google.com/mapfiles/kml/shapes/firedept.png</href>
</Icon>
</IconStyle>
<LabelStyle>
<scale>0</scale>
</LabelStyle>
</Style>
<name>Rank 387</name>
<description><![CDATA[  <table width="500">
<tr><td>Country: <b>NGA</b></td><td>Flare ID: <b>vnfdb_2012_09625</b></td></tr>
<tr><td colspan="2">Combustion parameters:</td></tr>
<tr><td>Lat=4.423857, Lon=7.154338 deg.</td><td>Tavg=1611.54 K, RHsum=3.1715 MW</td></tr>
<tr><td>Freq. detect.=82.42 %</td><td>Area=26.83 m2</td></tr>
<tr><td>BCM=0.0869</td><td>Type: LNG</td></tr>
</table>]]></description><Point>
<coordinates>7.154338,4.423857,0</coordinates>
</Point>
</Placemark>
<Placemark>
<Style id="highlightPlacemark388">
<IconStyle>
<scale>0.75</scale>
<Icon>
<href>http://maps.google.com/mapfiles/ms/micons/red.png</href>
</Icon>
</IconStyle>
<LabelStyle>
<scale>0</scale>
</LabelStyle>
</Style>
<name>Rank 388</name>
<description><![CDATA[  <table width="500">
<tr><td>Country: <b>SAU</b></td><td>Flare ID: <b>vnfdb_2012_08992</b></td></tr>
<tr><td colspan="2">Combustion parameters:</td></tr>
<tr><td>Lat=24.795542, Lon=49.348276 deg.</td><td>Tavg=1624.68 K, RHsum=3.17035 MW</td></tr>
<tr><td>Freq. detect.=93.93 %</td><td>Area=21.74 m2</td></tr>
<tr><td>BCM=0.0869</td><td>Type: upstream</td></tr>
</table>]]></description><Point>
<coordinates>49.348276,24.795542,0</coordinates>
</Point>
</Placemark>
<Placemark>
<Style id="highlightPlacemark389">
<IconStyle>
<scale>0.75</scale>
<Icon>
<href>http://maps.google.com/mapfiles/ms/micons/red.png</href>
</Icon>
</IconStyle>
<LabelStyle>
<scale>0</scale>
</LabelStyle>
</Style>
<name>Rank 389</name>
<description><![CDATA[  <table width="500">
<tr><td>Country: <b>RUS</b></td><td>Flare ID: <b>vnfdb_2012_10443</b></td></tr>
<tr><td colspan="2">Combustion parameters:</td></tr>
<tr><td>Lat=61.281804, Lon=72.973901 deg.</td><td>Tavg=1902.79 K, RHsum=3.16564 MW</td></tr>
<tr><td>Freq. detect.=84.91 %</td><td>Area=7.89 m2</td></tr>
<tr><td>BCM=0.0867</td><td>Type: upstream</td></tr>
</table>]]></description><Point>
<coordinates>72.973901,61.281804,0</coordinates>
</Point>
</Placemark>
<Placemark>
<Style id="highlightPlacemark390">
<IconStyle>
<scale>0.75</scale>
<Icon>
<href>http://maps.google.com/mapfiles/ms/micons/red.png</href>
</Icon>
</IconStyle>
<LabelStyle>
<scale>0</scale>
</LabelStyle>
</Style>
<name>Rank 390</name>
<description><![CDATA[  <table width="500">
<tr><td>Country: <b>RUS</b></td><td>Flare ID: <b>vnfdb_2012_10419</b></td></tr>
<tr><td colspan="2">Combustion parameters:</td></tr>
<tr><td>Lat=60.463951, Lon=72.312168 deg.</td><td>Tavg=1792.86 K, RHsum=3.16557 MW</td></tr>
<tr><td>Freq. detect.=49.58 %</td><td>Area=12.60 m2</td></tr>
<tr><td>BCM=0.0867</td><td>Type: upstream</td></tr>
</table>]]></description><Point>
<coordinates>72.312168,60.463951,0</coordinates>
</Point>
</Placemark>
<Placemark>
<Style id="highlightPlacemark391">
<IconStyle>
<scale>0.75</scale>
<Icon>
<href>http://maps.google.com/mapfiles/ms/micons/red.png</href>
</Icon>
</IconStyle>
<LabelStyle>
<scale>0</scale>
</LabelStyle>
</Style>
<name>Rank 391</name>
<description><![CDATA[  <table width="500">
<tr><td>Country: <b>OMN</b></td><td>Flare ID: <b>vnfdb_2012_09488</b></td></tr>
<tr><td colspan="2">Combustion parameters:</td></tr>
<tr><td>Lat=21.376422, Lon=56.718233 deg.</td><td>Tavg=1615.66 K, RHsum=3.16476 MW</td></tr>
<tr><td>Freq. detect.=81.96 %</td><td>Area=29.16 m2</td></tr>
<tr><td>BCM=0.0867</td><td>Type: upstream</td></tr>
</table>]]></description><Point>
<coordinates>56.718233,21.376422,0</coordinates>
</Point>
</Placemark>
<Placemark>
<Style id="highlightPlacemark392">
<IconStyle>
<scale>0.75</scale>
<Icon>
<href>http://maps.google.com/mapfiles/ms/micons/red.png</href>
</Icon>
</IconStyle>
<LabelStyle>
<scale>0</scale>
</LabelStyle>
</Style>
<name>Rank 392</name>
<description><![CDATA[  <table width="500">
<tr><td>Country: <b>UZB</b></td><td>Flare ID: <b>vnfdb_2012_11508</b></td></tr>
<tr><td colspan="2">Combustion parameters:</td></tr>
<tr><td>Lat=38.680098, Lon=65.958528 deg.</td><td>Tavg=1706.45 K, RHsum=3.16057 MW</td></tr>
<tr><td>Freq. detect.=97.55 %</td><td>Area=12.35 m2</td></tr>
<tr><td>BCM=0.0866</td><td>Type: upstream</td></tr>
</table>]]></description><Point>
<coordinates>65.958528,38.680098,0</coordinates>
</Point>
</Placemark>
<Placemark>
<Style id="highlightPlacemark393">
<IconStyle>
<scale>0.75</scale>
<Icon>
<href>http://maps.google.com/mapfiles/ms/micons/red.png</href>
</Icon>
</IconStyle>
<LabelStyle>
<scale>0</scale>
</LabelStyle>
</Style>
<name>Rank 393</name>
<description><![CDATA[  <table width="500">
<tr><td>Country: <b>NGA</b></td><td>Flare ID: <b>vnfdb_2012_09639</b></td></tr>
<tr><td colspan="2">Combustion parameters:</td></tr>
<tr><td>Lat=4.350329, Lon=7.311047 deg.</td><td>Tavg=1593.98 K, RHsum=3.14292 MW</td></tr>
<tr><td>Freq. detect.=91.81 %</td><td>Area=17.19 m2</td></tr>
<tr><td>BCM=0.0861</td><td>Type: upstream</td></tr>
</table>]]></description><Point>
<coordinates>7.311047,4.350329,0</coordinates>
</Point>
</Placemark>
<Placemark>
<Style id="highlightPlacemark394">
<IconStyle>
<scale>0.75</scale>
<Icon>
<href>http://maps.google.com/mapfiles/ms/micons/red.png</href>
</Icon>
</IconStyle>
<LabelStyle>
<scale>0</scale>
</LabelStyle>
</Style>
<name>Rank 394</name>
<description><![CDATA[  <table width="500">
<tr><td>Country: <b>NGA</b></td><td>Flare ID: <b>vnfdb_2012_07913</b></td></tr>
<tr><td colspan="2">Combustion parameters:</td></tr>
<tr><td>Lat=5.884371, Lon=6.218204 deg.</td><td>Tavg=1803.09 K, RHsum=3.14142 MW</td></tr>
<tr><td>Freq. detect.=83.27 %</td><td>Area=11.99 m2</td></tr>
<tr><td>BCM=0.0861</td><td>Type: upstream</td></tr>
</table>]]></description><Point>
<coordinates>6.218204,5.884371,0</coordinates>
</Point>
</Placemark>
<Placemark>
<Style id="highlightPlacemark395">
<IconStyle>
<scale>0.75</scale>
<Icon>
<href>http://maps.google.com/mapfiles/ms/micons/red.png</href>
</Icon>
</IconStyle>
<LabelStyle>
<scale>0</scale>
</LabelStyle>
</Style>
<name>Rank 395</name>
<description><![CDATA[  <table width="500">
<tr><td>Country: <b>TCD</b></td><td>Flare ID: <b>vnfdb_2012_08154</b></td></tr>
<tr><td colspan="2">Combustion parameters:</td></tr>
<tr><td>Lat=10.281500, Lon=16.732034 deg.</td><td>Tavg=1693.03 K, RHsum=3.1326 MW</td></tr>
<tr><td>Freq. detect.=92.50 %</td><td>Area=16.62 m2</td></tr>
<tr><td>BCM=0.0858</td><td>Type: upstream</td></tr>
</table>]]></description><Point>
<coordinates>16.732034,10.281500,0</coordinates>
</Point>
</Placemark>
<Placemark>
<Style id="highlightPlacemark396">
<IconStyle>
<scale>0.75</scale>
<Icon>
<href>http://maps.google.com/mapfiles/ms/micons/red.png</href>
</Icon>
</IconStyle>
<LabelStyle>
<scale>0</scale>
</LabelStyle>
</Style>
<name>Rank 396</name>
<description><![CDATA[  <table width="500">
<tr><td>Country: <b>IND</b></td><td>Flare ID: <b>vnfdb_2012_11572</b></td></tr>
<tr><td colspan="2">Combustion parameters:</td></tr>
<tr><td>Lat=19.526567, Lon=71.301413 deg.</td><td>Tavg=1617.82 K, RHsum=3.13042 MW</td></tr>
<tr><td>Freq. detect.=89.68 %</td><td>Area=25.30 m2</td></tr>
<tr><td>BCM=0.0858</td><td>Type: upstream</td></tr>
</table>]]></description><Point>
<coordinates>71.301413,19.526567,0</coordinates>
</Point>
</Placemark>
<Placemark>
<Style id="highlightPlacemark397">
<IconStyle>
<scale>0.75</scale>
<Icon>
<href>http://maps.google.com/mapfiles/kml/shapes/gas_stations.png</href>
</Icon>
</IconStyle>
<LabelStyle>
<scale>0</scale>
</LabelStyle>
</Style>
<name>Rank 397</name>
<description><![CDATA[  <table width="500">
<tr><td>Country: <b>VEN</b></td><td>Flare ID: <b>vnfdb_2012_05914</b></td></tr>
<tr><td colspan="2">Combustion parameters:</td></tr>
<tr><td>Lat=10.060850, Lon=-64.889357 deg.</td><td>Tavg=1536.81 K, RHsum=3.11334 MW</td></tr>
<tr><td>Freq. detect.=98.11 %</td><td>Area=32.91 m2</td></tr>
<tr><td>BCM=0.0853</td><td>Type: downstream</td></tr>
</table>]]></description><Point>
<coordinates>-64.889357,10.060850,0</coordinates>
</Point>
</Placemark>
<Placemark>
<Style id="highlightPlacemark398">
<IconStyle>
<scale>0.75</scale>
<Icon>
<href>http://maps.google.com/mapfiles/ms/micons/red.png</href>
</Icon>
</IconStyle>
<LabelStyle>
<scale>0</scale>
</LabelStyle>
</Style>
<name>Rank 398</name>
<description><![CDATA[  <table width="500">
<tr><td>Country: <b>LBY</b></td><td>Flare ID: <b>vnfdb_2012_08129</b></td></tr>
<tr><td colspan="2">Combustion parameters:</td></tr>
<tr><td>Lat=26.032748, Lon=11.976680 deg.</td><td>Tavg=1718.03 K, RHsum=3.10629 MW</td></tr>
<tr><td>Freq. detect.=95.03 %</td><td>Area=12.45 m2</td></tr>
<tr><td>BCM=0.0851</td><td>Type: upstream</td></tr>
</table>]]></description><Point>
<coordinates>11.976680,26.032748,0</coordinates>
</Point>
</Placemark>
<Placemark>
<Style id="highlightPlacemark399">
<IconStyle>
<scale>0.75</scale>
<Icon>
<href>http://maps.google.com/mapfiles/ms/micons/red.png</href>
</Icon>
</IconStyle>
<LabelStyle>
<scale>0</scale>
</LabelStyle>
</Style>
<name>Rank 399</name>
<description><![CDATA[  <table width="500">
<tr><td>Country: <b>DZA</b></td><td>Flare ID: <b>vnfdb_2012_08013</b></td></tr>
<tr><td colspan="2">Combustion parameters:</td></tr>
<tr><td>Lat=31.056050, Lon=8.033805 deg.</td><td>Tavg=1590.28 K, RHsum=3.10147 MW</td></tr>
<tr><td>Freq. detect.=98.49 %</td><td>Area=19.44 m2</td></tr>
<tr><td>BCM=0.085</td><td>Type: upstream</td></tr>
</table>]]></description><Point>
<coordinates>8.033805,31.056050,0</coordinates>
</Point>
</Placemark>
<Placemark>
<Style id="highlightPlacemark400">
<IconStyle>
<scale>0.75</scale>
<Icon>
<href>http://maps.google.com/mapfiles/ms/micons/red.png</href>
</Icon>
</IconStyle>
<LabelStyle>
<scale>0</scale>
</LabelStyle>
</Style>
<name>Rank 400</name>
<description><![CDATA[  <table width="500">
<tr><td>Country: <b>NGA</b></td><td>Flare ID: <b>vnfdb_2012_07769</b></td></tr>
<tr><td colspan="2">Combustion parameters:</td></tr>
<tr><td>Lat=5.559940, Lon=5.072079 deg.</td><td>Tavg=1722.43 K, RHsum=3.09822 MW</td></tr>
<tr><td>Freq. detect.=94.58 %</td><td>Area=14.91 m2</td></tr>
<tr><td>BCM=0.0849</td><td>Type: upstream</td></tr>
</table>]]></description><Point>
<coordinates>5.072079,5.559940,0</coordinates>
</Point>
</Placemark>
<Placemark>
<Style id="highlightPlacemark401">
<IconStyle>
<scale>0.75</scale>
<Icon>
<href>http://maps.google.com/mapfiles/ms/micons/red.png</href>
</Icon>
</IconStyle>
<LabelStyle>
<scale>0</scale>
</LabelStyle>
</Style>
<name>Rank 401</name>
<description><![CDATA[  <table width="500">
<tr><td>Country: <b>IRN</b></td><td>Flare ID: <b>vnfdb_2012_08747</b></td></tr>
<tr><td colspan="2">Combustion parameters:</td></tr>
<tr><td>Lat=33.252908, Lon=47.736042 deg.</td><td>Tavg=1643.47 K, RHsum=3.09798 MW</td></tr>
<tr><td>Freq. detect.=95.31 %</td><td>Area=16.89 m2</td></tr>
<tr><td>BCM=0.0849</td><td>Type: upstream</td></tr>
</table>]]></description><Point>
<coordinates>47.736042,33.252908,0</coordinates>
</Point>
</Placemark>
<Placemark>
<Style id="highlightPlacemark402">
<IconStyle>
<scale>0.75</scale>
<Icon>
<href>http://maps.google.com/mapfiles/ms/micons/red.png</href>
</Icon>
</IconStyle>
<LabelStyle>
<scale>0</scale>
</LabelStyle>
</Style>
<name>Rank 402</name>
<description><![CDATA[  <table width="500">
<tr><td>Country: <b>NGA</b></td><td>Flare ID: <b>vnfdb_2012_09711</b></td></tr>
<tr><td colspan="2">Combustion parameters:</td></tr>
<tr><td>Lat=4.291149, Lon=8.166135 deg.</td><td>Tavg=1566.1 K, RHsum=3.09615 MW</td></tr>
<tr><td>Freq. detect.=95.29 %</td><td>Area=23.19 m2</td></tr>
<tr><td>BCM=0.0848</td><td>Type: upstream</td></tr>
</table>]]></description><Point>
<coordinates>8.166135,4.291149,0</coordinates>
</Point>
</Placemark>
<Placemark>
<Style id="highlightPlacemark403">
<IconStyle>
<scale>0.75</scale>
<Icon>
<href>http://maps.google.com/mapfiles/ms/micons/red.png</href>
</Icon>
</IconStyle>
<LabelStyle>
<scale>0</scale>
</LabelStyle>
</Style>
<name>Rank 403</name>
<description><![CDATA[  <table width="500">
<tr><td>Country: <b>DZA</b></td><td>Flare ID: <b>vnfdb_2012_08019</b></td></tr>
<tr><td colspan="2">Combustion parameters:</td></tr>
<tr><td>Lat=30.611759, Lon=8.261544 deg.</td><td>Tavg=1634.21 K, RHsum=3.09414 MW</td></tr>
<tr><td>Freq. detect.=93.47 %</td><td>Area=18.98 m2</td></tr>
<tr><td>BCM=0.0848</td><td>Type: upstream</td></tr>
</table>]]></description><Point>
<coordinates>8.261544,30.611759,0</coordinates>
</Point>
</Placemark>
<Placemark>
<Style id="highlightPlacemark404">
<IconStyle>
<scale>0.75</scale>
<Icon>
<href>http://maps.google.com/mapfiles/ms/micons/red.png</href>
</Icon>
</IconStyle>
<LabelStyle>
<scale>0</scale>
</LabelStyle>
</Style>
<name>Rank 404</name>
<description><![CDATA[  <table width="500">
<tr><td>Country: <b>RUS</b></td><td>Flare ID: <b>vnfdb_2012_07546</b></td></tr>
<tr><td colspan="2">Combustion parameters:</td></tr>
<tr><td>Lat=66.953325, Lon=56.641202 deg.</td><td>Tavg=1742.72 K, RHsum=3.09088 MW</td></tr>
<tr><td>Freq. detect.=87.30 %</td><td>Area=12.07 m2</td></tr>
<tr><td>BCM=0.0847</td><td>Type: upstream</td></tr>
</table>]]></description><Point>
<coordinates>56.641202,66.953325,0</coordinates>
</Point>
</Placemark>
<Placemark>
<Style id="highlightPlacemark405">
<IconStyle>
<scale>0.75</scale>
<Icon>
<href>http://maps.google.com/mapfiles/ms/micons/red.png</href>
</Icon>
</IconStyle>
<LabelStyle>
<scale>0</scale>
</LabelStyle>
</Style>
<name>Rank 405</name>
<description><![CDATA[  <table width="500">
<tr><td>Country: <b>BRA</b></td><td>Flare ID: <b>vnfdb_2012_06639</b></td></tr>
<tr><td colspan="2">Combustion parameters:</td></tr>
<tr><td>Lat=-21.336430, Lon=-40.059253 deg.</td><td>Tavg=1850.98 K, RHsum=3.07979 MW</td></tr>
<tr><td>Freq. detect.=31.99 %</td><td>Area=14.35 m2</td></tr>
<tr><td>BCM=0.0844</td><td>Type: upstream</td></tr>
</table>]]></description><Point>
<coordinates>-40.059253,-21.336430,0</coordinates>
</Point>
</Placemark>
<Placemark>
<Style id="highlightPlacemark406">
<IconStyle>
<scale>0.75</scale>
<Icon>
<href>http://maps.google.com/mapfiles/ms/micons/red.png</href>
</Icon>
</IconStyle>
<LabelStyle>
<scale>0</scale>
</LabelStyle>
</Style>
<name>Rank 406</name>
<description><![CDATA[  <table width="500">
<tr><td>Country: <b>RUS</b></td><td>Flare ID: <b>vnfdb_2012_07186</b></td></tr>
<tr><td colspan="2">Combustion parameters:</td></tr>
<tr><td>Lat=43.434943, Lon=45.449535 deg.</td><td>Tavg=1723.26 K, RHsum=3.06815 MW</td></tr>
<tr><td>Freq. detect.=91.51 %</td><td>Area=12.96 m2</td></tr>
<tr><td>BCM=0.0841</td><td>Type: upstream</td></tr>
</table>]]></description><Point>
<coordinates>45.449535,43.434943,0</coordinates>
</Point>
</Placemark>
<Placemark>
<Style id="highlightPlacemark407">
<IconStyle>
<scale>0.75</scale>
<Icon>
<href>http://maps.google.com/mapfiles/ms/micons/red.png</href>
</Icon>
</IconStyle>
<LabelStyle>
<scale>0</scale>
</LabelStyle>
</Style>
<name>Rank 407</name>
<description><![CDATA[  <table width="500">
<tr><td>Country: <b>NGA</b></td><td>Flare ID: <b>vnfdb_2012_09589</b></td></tr>
<tr><td colspan="2">Combustion parameters:</td></tr>
<tr><td>Lat=3.142611, Lon=6.822106 deg.</td><td>Tavg=1476.15 K, RHsum=3.06242 MW</td></tr>
<tr><td>Freq. detect.=85.01 %</td><td>Area=37.57 m2</td></tr>
<tr><td>BCM=0.0839</td><td>Type: upstream</td></tr>
</table>]]></description><Point>
<coordinates>6.822106,3.142611,0</coordinates>
</Point>
</Placemark>
<Placemark>
<Style id="highlightPlacemark408">
<IconStyle>
<scale>0.75</scale>
<Icon>
<href>http://maps.google.com/mapfiles/ms/micons/red.png</href>
</Icon>
</IconStyle>
<LabelStyle>
<scale>0</scale>
</LabelStyle>
</Style>
<name>Rank 408</name>
<description><![CDATA[  <table width="500">
<tr><td>Country: <b>DZA</b></td><td>Flare ID: <b>vnfdb_2012_07904</b></td></tr>
<tr><td colspan="2">Combustion parameters:</td></tr>
<tr><td>Lat=31.686011, Lon=6.187676 deg.</td><td>Tavg=1626.78 K, RHsum=3.05582 MW</td></tr>
<tr><td>Freq. detect.=94.45 %</td><td>Area=27.51 m2</td></tr>
<tr><td>BCM=0.0837</td><td>Type: upstream</td></tr>
</table>]]></description><Point>
<coordinates>6.187676,31.686011,0</coordinates>
</Point>
</Placemark>
<Placemark>
<Style id="highlightPlacemark409">
<IconStyle>
<scale>0.75</scale>
<Icon>
<href>http://maps.google.com/mapfiles/ms/micons/red.png</href>
</Icon>
</IconStyle>
<LabelStyle>
<scale>0</scale>
</LabelStyle>
</Style>
<name>Rank 409</name>
<description><![CDATA[  <table width="500">
<tr><td>Country: <b>IRN</b></td><td>Flare ID: <b>vnfdb_2012_08860</b></td></tr>
<tr><td colspan="2">Combustion parameters:</td></tr>
<tr><td>Lat=30.922735, Lon=48.856106 deg.</td><td>Tavg=1596.7 K, RHsum=3.0333 MW</td></tr>
<tr><td>Freq. detect.=75.76 %</td><td>Area=18.37 m2</td></tr>
<tr><td>BCM=0.0831</td><td>Type: upstream</td></tr>
</table>]]></description><Point>
<coordinates>48.856106,30.922735,0</coordinates>
</Point>
</Placemark>
<Placemark>
<Style id="highlightPlacemark410">
<IconStyle>
<scale>0.75</scale>
<Icon>
<href>http://maps.google.com/mapfiles/ms/micons/red.png</href>
</Icon>
</IconStyle>
<LabelStyle>
<scale>0</scale>
</LabelStyle>
</Style>
<name>Rank 410</name>
<description><![CDATA[  <table width="500">
<tr><td>Country: <b>QAT</b></td><td>Flare ID: <b>vnfdb_2012_09231</b></td></tr>
<tr><td colspan="2">Combustion parameters:</td></tr>
<tr><td>Lat=26.636462, Lon=51.951594 deg.</td><td>Tavg=1588.9 K, RHsum=3.03284 MW</td></tr>
<tr><td>Freq. detect.=92.79 %</td><td>Area=19.94 m2</td></tr>
<tr><td>BCM=0.0831</td><td>Type: upstream</td></tr>
</table>]]></description><Point>
<coordinates>51.951594,26.636462,0</coordinates>
</Point>
</Placemark>
<Placemark>
<Style id="highlightPlacemark411">
<IconStyle>
<scale>0.75</scale>
<Icon>
<href>http://maps.google.com/mapfiles/ms/micons/red.png</href>
</Icon>
</IconStyle>
<LabelStyle>
<scale>0</scale>
</LabelStyle>
</Style>
<name>Rank 411</name>
<description><![CDATA[  <table width="500">
<tr><td>Country: <b>AUS</b></td><td>Flare ID: <b>vnfdb_2012_12692</b></td></tr>
<tr><td colspan="2">Combustion parameters:</td></tr>
<tr><td>Lat=-19.588035, Lon=116.445645 deg.</td><td>Tavg=1589.04 K, RHsum=3.01363 MW</td></tr>
<tr><td>Freq. detect.=69.34 %</td><td>Area=25.07 m2</td></tr>
<tr><td>BCM=0.0826</td><td>Type: upstream</td></tr>
</table>]]></description><Point>
<coordinates>116.445645,-19.588035,0</coordinates>
</Point>
</Placemark>
<Placemark>
<Style id="highlightPlacemark412">
<IconStyle>
<scale>0.75</scale>
<Icon>
<href>http://maps.google.com/mapfiles/ms/micons/red.png</href>
</Icon>
</IconStyle>
<LabelStyle>
<scale>0</scale>
</LabelStyle>
</Style>
<name>Rank 412</name>
<description><![CDATA[  <table width="500">
<tr><td>Country: <b>MYS</b></td><td>Flare ID: <b>vnfdb_2012_11934</b></td></tr>
<tr><td colspan="2">Combustion parameters:</td></tr>
<tr><td>Lat=5.501982, Lon=105.207510 deg.</td><td>Tavg=1619.07 K, RHsum=3.01005 MW</td></tr>
<tr><td>Freq. detect.=77.81 %</td><td>Area=19.32 m2</td></tr>
<tr><td>BCM=0.0825</td><td>Type: upstream</td></tr>
</table>]]></description><Point>
<coordinates>105.207510,5.501982,0</coordinates>
</Point>
</Placemark>
<Placemark>
<Style id="highlightPlacemark413">
<IconStyle>
<scale>0.75</scale>
<Icon>
<href>http://maps.google.com/mapfiles/ms/micons/red.png</href>
</Icon>
</IconStyle>
<LabelStyle>
<scale>0</scale>
</LabelStyle>
</Style>
<name>Rank 413</name>
<description><![CDATA[  <table width="500">
<tr><td>Country: <b>RUS</b></td><td>Flare ID: <b>vnfdb_2012_10673</b></td></tr>
<tr><td colspan="2">Combustion parameters:</td></tr>
<tr><td>Lat=62.054264, Lon=76.582280 deg.</td><td>Tavg=1788.32 K, RHsum=3.00346 MW</td></tr>
<tr><td>Freq. detect.=83.79 %</td><td>Area=10.55 m2</td></tr>
<tr><td>BCM=0.0823</td><td>Type: upstream</td></tr>
</table>]]></description><Point>
<coordinates>76.582280,62.054264,0</coordinates>
</Point>
</Placemark>
<Placemark>
<Style id="highlightPlacemark414">
<IconStyle>
<scale>0.75</scale>
<Icon>
<href>http://maps.google.com/mapfiles/ms/micons/red.png</href>
</Icon>
</IconStyle>
<LabelStyle>
<scale>0</scale>
</LabelStyle>
</Style>
<name>Rank 414</name>
<description><![CDATA[  <table width="500">
<tr><td>Country: <b>CMR</b></td><td>Flare ID: <b>vnfdb_2012_09742</b></td></tr>
<tr><td colspan="2">Combustion parameters:</td></tr>
<tr><td>Lat=4.285306, Lon=8.443591 deg.</td><td>Tavg=1643.44 K, RHsum=2.99786 MW</td></tr>
<tr><td>Freq. detect.=92.33 %</td><td>Area=14.24 m2</td></tr>
<tr><td>BCM=0.0821</td><td>Type: upstream</td></tr>
</table>]]></description><Point>
<coordinates>8.443591,4.285306,0</coordinates>
</Point>
</Placemark>
<Placemark>
<Style id="highlightPlacemark415">
<IconStyle>
<scale>0.75</scale>
<Icon>
<href>http://maps.google.com/mapfiles/kml/shapes/gas_stations.png</href>
</Icon>
</IconStyle>
<LabelStyle>
<scale>0</scale>
</LabelStyle>
</Style>
<name>Rank 415</name>
<description><![CDATA[  <table width="500">
<tr><td>Country: <b>SAU</b></td><td>Flare ID: <b>vnfdb_2012_08842</b></td></tr>
<tr><td colspan="2">Combustion parameters:</td></tr>
<tr><td>Lat=28.412027, Lon=48.539701 deg.</td><td>Tavg=1752.98 K, RHsum=2.99738 MW</td></tr>
<tr><td>Freq. detect.=96.05 %</td><td>Area=11.64 m2</td></tr>
<tr><td>BCM=0.0821</td><td>Type: downstream</td></tr>
</table>]]></description><Point>
<coordinates>48.539701,28.412027,0</coordinates>
</Point>
</Placemark>
<Placemark>
<Style id="highlightPlacemark416">
<IconStyle>
<scale>0.75</scale>
<Icon>
<href>http://maps.google.com/mapfiles/ms/micons/red.png</href>
</Icon>
</IconStyle>
<LabelStyle>
<scale>0</scale>
</LabelStyle>
</Style>
<name>Rank 416</name>
<description><![CDATA[  <table width="500">
<tr><td>Country: <b>IRQ</b></td><td>Flare ID: <b>vnfdb_2012_08697</b></td></tr>
<tr><td colspan="2">Combustion parameters:</td></tr>
<tr><td>Lat=32.369609, Lon=47.404747 deg.</td><td>Tavg=1614.26 K, RHsum=2.99429 MW</td></tr>
<tr><td>Freq. detect.=95.90 %</td><td>Area=17.33 m2</td></tr>
<tr><td>BCM=0.082</td><td>Type: upstream</td></tr>
</table>]]></description><Point>
<coordinates>47.404747,32.369609,0</coordinates>
</Point>
</Placemark>
<Placemark>
<Style id="highlightPlacemark417">
<IconStyle>
<scale>0.75</scale>
<Icon>
<href>http://maps.google.com/mapfiles/ms/micons/red.png</href>
</Icon>
</IconStyle>
<LabelStyle>
<scale>0</scale>
</LabelStyle>
</Style>
<name>Rank 417</name>
<description><![CDATA[  <table width="500">
<tr><td>Country: <b>NGA</b></td><td>Flare ID: <b>vnfdb_2012_09586</b></td></tr>
<tr><td colspan="2">Combustion parameters:</td></tr>
<tr><td>Lat=4.530235, Lon=6.816914 deg.</td><td>Tavg=1584.79 K, RHsum=2.99251 MW</td></tr>
<tr><td>Freq. detect.=78.07 %</td><td>Area=17.36 m2</td></tr>
<tr><td>BCM=0.082</td><td>Type: upstream</td></tr>
</table>]]></description><Point>
<coordinates>6.816914,4.530235,0</coordinates>
</Point>
</Placemark>
<Placemark>
<Style id="highlightPlacemark418">
<IconStyle>
<scale>0.75</scale>
<Icon>
<href>http://maps.google.com/mapfiles/kml/shapes/gas_stations.png</href>
</Icon>
</IconStyle>
<LabelStyle>
<scale>0</scale>
</LabelStyle>
</Style>
<name>Rank 418</name>
<description><![CDATA[  <table width="500">
<tr><td>Country: <b>MEX</b></td><td>Flare ID: <b>vnfdb_2012_05437</b></td></tr>
<tr><td colspan="2">Combustion parameters:</td></tr>
<tr><td>Lat=18.137601, Lon=-94.358625 deg.</td><td>Tavg=1747.3 K, RHsum=2.98898 MW</td></tr>
<tr><td>Freq. detect.=90.21 %</td><td>Area=13.32 m2</td></tr>
<tr><td>BCM=0.0819</td><td>Type: downstream</td></tr>
</table>]]></description><Point>
<coordinates>-94.358625,18.137601,0</coordinates>
</Point>
</Placemark>
<Placemark>
<Style id="highlightPlacemark419">
<IconStyle>
<scale>0.75</scale>
<Icon>
<href>http://maps.google.com/mapfiles/ms/micons/red.png</href>
</Icon>
</IconStyle>
<LabelStyle>
<scale>0</scale>
</LabelStyle>
</Style>
<name>Rank 419</name>
<description><![CDATA[  <table width="500">
<tr><td>Country: <b>ARE</b></td><td>Flare ID: <b>vnfdb_2012_09329</b></td></tr>
<tr><td colspan="2">Combustion parameters:</td></tr>
<tr><td>Lat=23.850272, Lon=53.651567 deg.</td><td>Tavg=1610.36 K, RHsum=2.98898 MW</td></tr>
<tr><td>Freq. detect.=97.59 %</td><td>Area=19.48 m2</td></tr>
<tr><td>BCM=0.0819</td><td>Type: upstream</td></tr>
</table>]]></description><Point>
<coordinates>53.651567,23.850272,0</coordinates>
</Point>
</Placemark>
<Placemark>
<Style id="highlightPlacemark420">
<IconStyle>
<scale>0.75</scale>
<Icon>
<href>http://maps.google.com/mapfiles/ms/micons/red.png</href>
</Icon>
</IconStyle>
<LabelStyle>
<scale>0</scale>
</LabelStyle>
</Style>
<name>Rank 420</name>
<description><![CDATA[  <table width="500">
<tr><td>Country: <b>DZA</b></td><td>Flare ID: <b>vnfdb_2012_07976</b></td></tr>
<tr><td colspan="2">Combustion parameters:</td></tr>
<tr><td>Lat=29.671867, Lon=6.723561 deg.</td><td>Tavg=1694.58 K, RHsum=2.98888 MW</td></tr>
<tr><td>Freq. detect.=78.66 %</td><td>Area=20.50 m2</td></tr>
<tr><td>BCM=0.0819</td><td>Type: upstream</td></tr>
</table>]]></description><Point>
<coordinates>6.723561,29.671867,0</coordinates>
</Point>
</Placemark>
<Placemark>
<Style id="highlightPlacemark421">
<IconStyle>
<scale>0.75</scale>
<Icon>
<href>http://maps.google.com/mapfiles/ms/micons/red.png</href>
</Icon>
</IconStyle>
<LabelStyle>
<scale>0</scale>
</LabelStyle>
</Style>
<name>Rank 421</name>
<description><![CDATA[  <table width="500">
<tr><td>Country: <b>RUS</b></td><td>Flare ID: <b>vnfdb_2012_10932</b></td></tr>
<tr><td colspan="2">Combustion parameters:</td></tr>
<tr><td>Lat=57.904693, Lon=79.303182 deg.</td><td>Tavg=1696.07 K, RHsum=2.97212 MW</td></tr>
<tr><td>Freq. detect.=88.13 %</td><td>Area=13.91 m2</td></tr>
<tr><td>BCM=0.0814</td><td>Type: upstream</td></tr>
</table>]]></description><Point>
<coordinates>79.303182,57.904693,0</coordinates>
</Point>
</Placemark>
<Placemark>
<Style id="highlightPlacemark422">
<IconStyle>
<scale>0.75</scale>
<Icon>
<href>http://maps.google.com/mapfiles/kml/shapes/gas_stations.png</href>
</Icon>
</IconStyle>
<LabelStyle>
<scale>0</scale>
</LabelStyle>
</Style>
<name>Rank 422</name>
<description><![CDATA[  <table width="500">
<tr><td>Country: <b>IDN</b></td><td>Flare ID: <b>vnfdb_2012_12631</b></td></tr>
<tr><td colspan="2">Combustion parameters:</td></tr>
<tr><td>Lat=-6.378086, Lon=108.398274 deg.</td><td>Tavg=1747.68 K, RHsum=2.9677 MW</td></tr>
<tr><td>Freq. detect.=88.36 %</td><td>Area=12.66 m2</td></tr>
<tr><td>BCM=0.0813</td><td>Type: downstream</td></tr>
</table>]]></description><Point>
<coordinates>108.398274,-6.378086,0</coordinates>
</Point>
</Placemark>
<Placemark>
<Style id="highlightPlacemark423">
<IconStyle>
<scale>0.75</scale>
<Icon>
<href>http://maps.google.com/mapfiles/ms/micons/red.png</href>
</Icon>
</IconStyle>
<LabelStyle>
<scale>0</scale>
</LabelStyle>
</Style>
<name>Rank 423</name>
<description><![CDATA[  <table width="500">
<tr><td>Country: <b>OMN</b></td><td>Flare ID: <b>vnfdb_2012_09449</b></td></tr>
<tr><td colspan="2">Combustion parameters:</td></tr>
<tr><td>Lat=22.671695, Lon=56.246119 deg.</td><td>Tavg=1699.72 K, RHsum=2.96558 MW</td></tr>
<tr><td>Freq. detect.=94.74 %</td><td>Area=13.62 m2</td></tr>
<tr><td>BCM=0.0813</td><td>Type: upstream</td></tr>
</table>]]></description><Point>
<coordinates>56.246119,22.671695,0</coordinates>
</Point>
</Placemark>
<Placemark>
<Style id="highlightPlacemark424">
<IconStyle>
<scale>0.75</scale>
<Icon>
<href>http://maps.google.com/mapfiles/ms/micons/red.png</href>
</Icon>
</IconStyle>
<LabelStyle>
<scale>0</scale>
</LabelStyle>
</Style>
<name>Rank 424</name>
<description><![CDATA[  <table width="500">
<tr><td>Country: <b>DZA</b></td><td>Flare ID: <b>vnfdb_2012_08045</b></td></tr>
<tr><td colspan="2">Combustion parameters:</td></tr>
<tr><td>Lat=27.750664, Lon=9.151276 deg.</td><td>Tavg=1643.42 K, RHsum=2.96168 MW</td></tr>
<tr><td>Freq. detect.=96.88 %</td><td>Area=14.61 m2</td></tr>
<tr><td>BCM=0.0811</td><td>Type: upstream</td></tr>
</table>]]></description><Point>
<coordinates>9.151276,27.750664,0</coordinates>
</Point>
</Placemark>
<Placemark>
<Style id="highlightPlacemark425">
<IconStyle>
<scale>0.75</scale>
<Icon>
<href>http://maps.google.com/mapfiles/ms/micons/red.png</href>
</Icon>
</IconStyle>
<LabelStyle>
<scale>0</scale>
</LabelStyle>
</Style>
<name>Rank 425</name>
<description><![CDATA[  <table width="500">
<tr><td>Country: <b>RUS</b></td><td>Flare ID: <b>vnfdb_2012_10193</b></td></tr>
<tr><td colspan="2">Combustion parameters:</td></tr>
<tr><td>Lat=67.661008, Lon=60.507116 deg.</td><td>Tavg=1836.88 K, RHsum=2.95588 MW</td></tr>
<tr><td>Freq. detect.=90.58 %</td><td>Area=8.54 m2</td></tr>
<tr><td>BCM=0.081</td><td>Type: upstream</td></tr>
</table>]]></description><Point>
<coordinates>60.507116,67.661008,0</coordinates>
</Point>
</Placemark>
<Placemark>
<Style id="highlightPlacemark426">
<IconStyle>
<scale>0.75</scale>
<Icon>
<href>http://maps.google.com/mapfiles/ms/micons/red.png</href>
</Icon>
</IconStyle>
<LabelStyle>
<scale>0</scale>
</LabelStyle>
</Style>
<name>Rank 426</name>
<description><![CDATA[  <table width="500">
<tr><td>Country: <b>MYS</b></td><td>Flare ID: <b>vnfdb_2012_11936</b></td></tr>
<tr><td colspan="2">Combustion parameters:</td></tr>
<tr><td>Lat=5.434445, Lon=105.217350 deg.</td><td>Tavg=1607.31 K, RHsum=2.95408 MW</td></tr>
<tr><td>Freq. detect.=90.88 %</td><td>Area=17.37 m2</td></tr>
<tr><td>BCM=0.0809</td><td>Type: upstream</td></tr>
</table>]]></description><Point>
<coordinates>105.217350,5.434445,0</coordinates>
</Point>
</Placemark>
<Placemark>
<Style id="highlightPlacemark427">
<IconStyle>
<scale>0.75</scale>
<Icon>
<href>http://maps.google.com/mapfiles/ms/micons/red.png</href>
</Icon>
</IconStyle>
<LabelStyle>
<scale>0</scale>
</LabelStyle>
</Style>
<name>Rank 427</name>
<description><![CDATA[  <table width="500">
<tr><td>Country: <b>IRN</b></td><td>Flare ID: <b>vnfdb_2012_09087</b></td></tr>
<tr><td colspan="2">Combustion parameters:</td></tr>
<tr><td>Lat=31.007658, Lon=49.934485 deg.</td><td>Tavg=1655.96 K, RHsum=2.954 MW</td></tr>
<tr><td>Freq. detect.=86.71 %</td><td>Area=16.42 m2</td></tr>
<tr><td>BCM=0.0809</td><td>Type: upstream</td></tr>
</table>]]></description><Point>
<coordinates>49.934485,31.007658,0</coordinates>
</Point>
</Placemark>
<Placemark>
<Style id="highlightPlacemark428">
<IconStyle>
<scale>0.75</scale>
<Icon>
<href>http://maps.google.com/mapfiles/ms/micons/red.png</href>
</Icon>
</IconStyle>
<LabelStyle>
<scale>0</scale>
</LabelStyle>
</Style>
<name>Rank 428</name>
<description><![CDATA[  <table width="500">
<tr><td>Country: <b>IND</b></td><td>Flare ID: <b>vnfdb_2012_11578</b></td></tr>
<tr><td colspan="2">Combustion parameters:</td></tr>
<tr><td>Lat=19.418009, Lon=71.389340 deg.</td><td>Tavg=1683.21 K, RHsum=2.95395 MW</td></tr>
<tr><td>Freq. detect.=77.48 %</td><td>Area=16.04 m2</td></tr>
<tr><td>BCM=0.0809</td><td>Type: upstream</td></tr>
</table>]]></description><Point>
<coordinates>71.389340,19.418009,0</coordinates>
</Point>
</Placemark>
<Placemark>
<Style id="highlightPlacemark429">
<IconStyle>
<scale>0.75</scale>
<Icon>
<href>http://maps.google.com/mapfiles/kml/shapes/gas_stations.png</href>
</Icon>
</IconStyle>
<LabelStyle>
<scale>0</scale>
</LabelStyle>
</Style>
<name>Rank 429</name>
<description><![CDATA[  <table width="500">
<tr><td>Country: <b>MEX</b></td><td>Flare ID: <b>vnfdb_2012_04108</b></td></tr>
<tr><td colspan="2">Combustion parameters:</td></tr>
<tr><td>Lat=20.049169, Lon=-99.291371 deg.</td><td>Tavg=1622.03 K, RHsum=2.95307 MW</td></tr>
<tr><td>Freq. detect.=93.53 %</td><td>Area=17.43 m2</td></tr>
<tr><td>BCM=0.0809</td><td>Type: downstream</td></tr>
</table>]]></description><Point>
<coordinates>-99.291371,20.049169,0</coordinates>
</Point>
</Placemark>
<Placemark>
<Style id="highlightPlacemark430">
<IconStyle>
<scale>0.75</scale>
<Icon>
<href>http://maps.google.com/mapfiles/kml/shapes/firedept.png</href>
</Icon>
</IconStyle>
<LabelStyle>
<scale>0</scale>
</LabelStyle>
</Style>
<name>Rank 430</name>
<description><![CDATA[  <table width="500">
<tr><td>Country: <b>LBY</b></td><td>Flare ID: <b>vnfdb_2012_08190</b></td></tr>
<tr><td colspan="2">Combustion parameters:</td></tr>
<tr><td>Lat=30.404158, Lon=19.608985 deg.</td><td>Tavg=1667.49 K, RHsum=2.9516 MW</td></tr>
<tr><td>Freq. detect.=93.85 %</td><td>Area=19.94 m2</td></tr>
<tr><td>BCM=0.0809</td><td>Type: LNG</td></tr>
</table>]]></description><Point>
<coordinates>19.608985,30.404158,0</coordinates>
</Point>
</Placemark>
<Placemark>
<Style id="highlightPlacemark431">
<IconStyle>
<scale>0.75</scale>
<Icon>
<href>http://maps.google.com/mapfiles/ms/micons/red.png</href>
</Icon>
</IconStyle>
<LabelStyle>
<scale>0</scale>
</LabelStyle>
</Style>
<name>Rank 431</name>
<description><![CDATA[  <table width="500">
<tr><td>Country: <b>MYS</b></td><td>Flare ID: <b>vnfdb_2012_11931</b></td></tr>
<tr><td colspan="2">Combustion parameters:</td></tr>
<tr><td>Lat=5.643900, Lon=105.043096 deg.</td><td>Tavg=1700.52 K, RHsum=2.94655 MW</td></tr>
<tr><td>Freq. detect.=86.22 %</td><td>Area=15.47 m2</td></tr>
<tr><td>BCM=0.0807</td><td>Type: upstream</td></tr>
</table>]]></description><Point>
<coordinates>105.043096,5.643900,0</coordinates>
</Point>
</Placemark>
<Placemark>
<Style id="highlightPlacemark432">
<IconStyle>
<scale>0.75</scale>
<Icon>
<href>http://maps.google.com/mapfiles/ms/micons/red.png</href>
</Icon>
</IconStyle>
<LabelStyle>
<scale>0</scale>
</LabelStyle>
</Style>
<name>Rank 432</name>
<description><![CDATA[  <table width="500">
<tr><td>Country: <b>RUS</b></td><td>Flare ID: <b>vnfdb_2012_07297</b></td></tr>
<tr><td colspan="2">Combustion parameters:</td></tr>
<tr><td>Lat=52.875737, Lon=51.197758 deg.</td><td>Tavg=1632.09 K, RHsum=2.9394 MW</td></tr>
<tr><td>Freq. detect.=77.20 %</td><td>Area=21.73 m2</td></tr>
<tr><td>BCM=0.0805</td><td>Type: upstream</td></tr>
</table>]]></description><Point>
<coordinates>51.197758,52.875737,0</coordinates>
</Point>
</Placemark>
<Placemark>
<Style id="highlightPlacemark433">
<IconStyle>
<scale>0.75</scale>
<Icon>
<href>http://maps.google.com/mapfiles/kml/shapes/gas_stations.png</href>
</Icon>
</IconStyle>
<LabelStyle>
<scale>0</scale>
</LabelStyle>
</Style>
<name>Rank 433</name>
<description><![CDATA[  <table width="500">
<tr><td>Country: <b>BRN</b></td><td>Flare ID: <b>vnfdb_2012_12678</b></td></tr>
<tr><td colspan="2">Combustion parameters:</td></tr>
<tr><td>Lat=4.617293, Lon=114.340529 deg.</td><td>Tavg=1677.46 K, RHsum=2.93697 MW</td></tr>
<tr><td>Freq. detect.=61.46 %</td><td>Area=9.27 m2</td></tr>
<tr><td>BCM=0.0805</td><td>Type: downstream</td></tr>
</table>]]></description><Point>
<coordinates>114.340529,4.617293,0</coordinates>
</Point>
</Placemark>
<Placemark>
<Style id="highlightPlacemark435">
<IconStyle>
<scale>0.75</scale>
<Icon>
<href>http://maps.google.com/mapfiles/ms/micons/red.png</href>
</Icon>
</IconStyle>
<LabelStyle>
<scale>0</scale>
</LabelStyle>
</Style>
<name>Rank 435</name>
<description><![CDATA[  <table width="500">
<tr><td>Country: <b>RUS</b></td><td>Flare ID: <b>vnfdb_2012_10716</b></td></tr>
<tr><td colspan="2">Combustion parameters:</td></tr>
<tr><td>Lat=62.998404, Lon=76.787706 deg.</td><td>Tavg=1785.1 K, RHsum=2.90742 MW</td></tr>
<tr><td>Freq. detect.=49.22 %</td><td>Area=9.99 m2</td></tr>
<tr><td>BCM=0.0797</td><td>Type: upstream</td></tr>
</table>]]></description><Point>
<coordinates>76.787706,62.998404,0</coordinates>
</Point>
</Placemark>
<Placemark>
<Style id="highlightPlacemark436">
<IconStyle>
<scale>0.75</scale>
<Icon>
<href>http://maps.google.com/mapfiles/ms/micons/red.png</href>
</Icon>
</IconStyle>
<LabelStyle>
<scale>0</scale>
</LabelStyle>
</Style>
<name>Rank 436</name>
<description><![CDATA[  <table width="500">
<tr><td>Country: <b>KAZ</b></td><td>Flare ID: <b>vnfdb_2012_07615</b></td></tr>
<tr><td colspan="2">Combustion parameters:</td></tr>
<tr><td>Lat=48.385412, Lon=57.425177 deg.</td><td>Tavg=1705.29 K, RHsum=2.89758 MW</td></tr>
<tr><td>Freq. detect.=89.69 %</td><td>Area=14.23 m2</td></tr>
<tr><td>BCM=0.0794</td><td>Type: upstream</td></tr>
</table>]]></description><Point>
<coordinates>57.425177,48.385412,0</coordinates>
</Point>
</Placemark>
<Placemark>
<Style id="highlightPlacemark437">
<IconStyle>
<scale>0.75</scale>
<Icon>
<href>http://maps.google.com/mapfiles/ms/micons/red.png</href>
</Icon>
</IconStyle>
<LabelStyle>
<scale>0</scale>
</LabelStyle>
</Style>
<name>Rank 437</name>
<description><![CDATA[  <table width="500">
<tr><td>Country: <b>RUS</b></td><td>Flare ID: <b>vnfdb_2012_07565</b></td></tr>
<tr><td colspan="2">Combustion parameters:</td></tr>
<tr><td>Lat=59.144740, Lon=56.860852 deg.</td><td>Tavg=1774.06 K, RHsum=2.88135 MW</td></tr>
<tr><td>Freq. detect.=74.97 %</td><td>Area=10.29 m2</td></tr>
<tr><td>BCM=0.0789</td><td>Type: upstream</td></tr>
</table>]]></description><Point>
<coordinates>56.860852,59.144740,0</coordinates>
</Point>
</Placemark>
<Placemark>
<Style id="highlightPlacemark438">
<IconStyle>
<scale>0.75</scale>
<Icon>
<href>http://maps.google.com/mapfiles/ms/micons/red.png</href>
</Icon>
</IconStyle>
<LabelStyle>
<scale>0</scale>
</LabelStyle>
</Style>
<name>Rank 438</name>
<description><![CDATA[  <table width="500">
<tr><td>Country: <b>IRN</b></td><td>Flare ID: <b>vnfdb_2012_09174</b></td></tr>
<tr><td colspan="2">Combustion parameters:</td></tr>
<tr><td>Lat=30.257570, Lon=50.779285 deg.</td><td>Tavg=1601.79 K, RHsum=2.87145 MW</td></tr>
<tr><td>Freq. detect.=96.82 %</td><td>Area=19.28 m2</td></tr>
<tr><td>BCM=0.0787</td><td>Type: upstream</td></tr>
</table>]]></description><Point>
<coordinates>50.779285,30.257570,0</coordinates>
</Point>
</Placemark>
<Placemark>
<Style id="highlightPlacemark439">
<IconStyle>
<scale>0.75</scale>
<Icon>
<href>http://maps.google.com/mapfiles/ms/micons/red.png</href>
</Icon>
</IconStyle>
<LabelStyle>
<scale>0</scale>
</LabelStyle>
</Style>
<name>Rank 439</name>
<description><![CDATA[  <table width="500">
<tr><td>Country: <b>MEX</b></td><td>Flare ID: <b>vnfdb_2012_05645</b></td></tr>
<tr><td colspan="2">Combustion parameters:</td></tr>
<tr><td>Lat=19.369376, Lon=-92.007883 deg.</td><td>Tavg=1442.3 K, RHsum=2.85971 MW</td></tr>
<tr><td>Freq. detect.=94.73 %</td><td>Area=32.30 m2</td></tr>
<tr><td>BCM=0.0784</td><td>Type: upstream</td></tr>
</table>]]></description><Point>
<coordinates>-92.007883,19.369376,0</coordinates>
</Point>
</Placemark>
<Placemark>
<Style id="highlightPlacemark440">
<IconStyle>
<scale>0.75</scale>
<Icon>
<href>http://maps.google.com/mapfiles/ms/micons/red.png</href>
</Icon>
</IconStyle>
<LabelStyle>
<scale>0</scale>
</LabelStyle>
</Style>
<name>Rank 440</name>
<description><![CDATA[  <table width="500">
<tr><td>Country: <b>SYR</b></td><td>Flare ID: <b>vnfdb_2012_08485</b></td></tr>
<tr><td colspan="2">Combustion parameters:</td></tr>
<tr><td>Lat=35.347434, Lon=40.318173 deg.</td><td>Tavg=1696.09 K, RHsum=2.85345 MW</td></tr>
<tr><td>Freq. detect.=69.18 %</td><td>Area=13.90 m2</td></tr>
<tr><td>BCM=0.0782</td><td>Type: upstream</td></tr>
</table>]]></description><Point>
<coordinates>40.318173,35.347434,0</coordinates>
</Point>
</Placemark>
<Placemark>
<Style id="highlightPlacemark441">
<IconStyle>
<scale>0.75</scale>
<Icon>
<href>http://maps.google.com/mapfiles/ms/micons/red.png</href>
</Icon>
</IconStyle>
<LabelStyle>
<scale>0</scale>
</LabelStyle>
</Style>
<name>Rank 441</name>
<description><![CDATA[  <table width="500">
<tr><td>Country: <b>RUS</b></td><td>Flare ID: <b>vnfdb_2012_10574</b></td></tr>
<tr><td colspan="2">Combustion parameters:</td></tr>
<tr><td>Lat=60.050332, Lon=75.453072 deg.</td><td>Tavg=1810.14 K, RHsum=2.85286 MW</td></tr>
<tr><td>Freq. detect.=82.95 %</td><td>Area=8.86 m2</td></tr>
<tr><td>BCM=0.0782</td><td>Type: upstream</td></tr>
</table>]]></description><Point>
<coordinates>75.453072,60.050332,0</coordinates>
</Point>
</Placemark>
<Placemark>
<Style id="highlightPlacemark442">
<IconStyle>
<scale>0.75</scale>
<Icon>
<href>http://maps.google.com/mapfiles/ms/micons/red.png</href>
</Icon>
</IconStyle>
<LabelStyle>
<scale>0</scale>
</LabelStyle>
</Style>
<name>Rank 442</name>
<description><![CDATA[  <table width="500">
<tr><td>Country: <b>TKM</b></td><td>Flare ID: <b>vnfdb_2012_09299</b></td></tr>
<tr><td colspan="2">Combustion parameters:</td></tr>
<tr><td>Lat=39.461252, Lon=52.811039 deg.</td><td>Tavg=1831.81 K, RHsum=2.85139 MW</td></tr>
<tr><td>Freq. detect.=94.14 %</td><td>Area=7.74 m2</td></tr>
<tr><td>BCM=0.0781</td><td>Type: upstream</td></tr>
</table>]]></description><Point>
<coordinates>52.811039,39.461252,0</coordinates>
</Point>
</Placemark>
<Placemark>
<Style id="highlightPlacemark443">
<IconStyle>
<scale>0.75</scale>
<Icon>
<href>http://maps.google.com/mapfiles/ms/micons/red.png</href>
</Icon>
</IconStyle>
<LabelStyle>
<scale>0</scale>
</LabelStyle>
</Style>
<name>Rank 443</name>
<description><![CDATA[  <table width="500">
<tr><td>Country: <b>VEN</b></td><td>Flare ID: <b>vnfdb_2012_05921</b></td></tr>
<tr><td colspan="2">Combustion parameters:</td></tr>
<tr><td>Lat=8.404287, Lon=-64.793695 deg.</td><td>Tavg=1681.01 K, RHsum=2.84356 MW</td></tr>
<tr><td>Freq. detect.=98.23 %</td><td>Area=14.86 m2</td></tr>
<tr><td>BCM=0.0779</td><td>Type: upstream</td></tr>
</table>]]></description><Point>
<coordinates>-64.793695,8.404287,0</coordinates>
</Point>
</Placemark>
<Placemark>
<Style id="highlightPlacemark444">
<IconStyle>
<scale>0.75</scale>
<Icon>
<href>http://maps.google.com/mapfiles/ms/micons/red.png</href>
</Icon>
</IconStyle>
<LabelStyle>
<scale>0</scale>
</LabelStyle>
</Style>
<name>Rank 444</name>
<description><![CDATA[  <table width="500">
<tr><td>Country: <b>RUS</b></td><td>Flare ID: <b>vnfdb_2012_10695</b></td></tr>
<tr><td colspan="2">Combustion parameters:</td></tr>
<tr><td>Lat=63.062262, Lon=76.689572 deg.</td><td>Tavg=1706.31 K, RHsum=2.83457 MW</td></tr>
<tr><td>Freq. detect.=46.46 %</td><td>Area=13.26 m2</td></tr>
<tr><td>BCM=0.0777</td><td>Type: upstream</td></tr>
</table>]]></description><Point>
<coordinates>76.689572,63.062262,0</coordinates>
</Point>
</Placemark>
<Placemark>
<Style id="highlightPlacemark445">
<IconStyle>
<scale>0.75</scale>
<Icon>
<href>http://maps.google.com/mapfiles/ms/micons/red.png</href>
</Icon>
</IconStyle>
<LabelStyle>
<scale>0</scale>
</LabelStyle>
</Style>
<name>Rank 445</name>
<description><![CDATA[  <table width="500">
<tr><td>Country: <b>EGY</b></td><td>Flare ID: <b>vnfdb_2012_08283</b></td></tr>
<tr><td colspan="2">Combustion parameters:</td></tr>
<tr><td>Lat=30.705747, Lon=26.977889 deg.</td><td>Tavg=1700.04 K, RHsum=2.82538 MW</td></tr>
<tr><td>Freq. detect.=97.60 %</td><td>Area=11.10 m2</td></tr>
<tr><td>BCM=0.0774</td><td>Type: upstream</td></tr>
</table>]]></description><Point>
<coordinates>26.977889,30.705747,0</coordinates>
</Point>
</Placemark>
<Placemark>
<Style id="highlightPlacemark446">
<IconStyle>
<scale>0.75</scale>
<Icon>
<href>http://maps.google.com/mapfiles/ms/micons/red.png</href>
</Icon>
</IconStyle>
<LabelStyle>
<scale>0</scale>
</LabelStyle>
</Style>
<name>Rank 446</name>
<description><![CDATA[  <table width="500">
<tr><td>Country: <b>MYS</b></td><td>Flare ID: <b>vnfdb_2012_12300</b></td></tr>
<tr><td colspan="2">Combustion parameters:</td></tr>
<tr><td>Lat=5.618677, Lon=114.889901 deg.</td><td>Tavg=1654.03 K, RHsum=2.82498 MW</td></tr>
<tr><td>Freq. detect.=93.00 %</td><td>Area=17.52 m2</td></tr>
<tr><td>BCM=0.0774</td><td>Type: upstream</td></tr>
</table>]]></description><Point>
<coordinates>114.889901,5.618677,0</coordinates>
</Point>
</Placemark>
<Placemark>
<Style id="highlightPlacemark447">
<IconStyle>
<scale>0.75</scale>
<Icon>
<href>http://maps.google.com/mapfiles/ms/micons/red.png</href>
</Icon>
</IconStyle>
<LabelStyle>
<scale>0</scale>
</LabelStyle>
</Style>
<name>Rank 447</name>
<description><![CDATA[  <table width="500">
<tr><td>Country: <b>NGA</b></td><td>Flare ID: <b>vnfdb_2012_09725</b></td></tr>
<tr><td colspan="2">Combustion parameters:</td></tr>
<tr><td>Lat=4.272249, Lon=8.336407 deg.</td><td>Tavg=1684.32 K, RHsum=2.82446 MW</td></tr>
<tr><td>Freq. detect.=96.07 %</td><td>Area=12.18 m2</td></tr>
<tr><td>BCM=0.0774</td><td>Type: upstream</td></tr>
</table>]]></description><Point>
<coordinates>8.336407,4.272249,0</coordinates>
</Point>
</Placemark>
<Placemark>
<Style id="highlightPlacemark448">
<IconStyle>
<scale>0.75</scale>
<Icon>
<href>http://maps.google.com/mapfiles/ms/micons/red.png</href>
</Icon>
</IconStyle>
<LabelStyle>
<scale>0</scale>
</LabelStyle>
</Style>
<name>Rank 448</name>
<description><![CDATA[  <table width="500">
<tr><td>Country: <b>DZA</b></td><td>Flare ID: <b>vnfdb_2012_07712</b></td></tr>
<tr><td colspan="2">Combustion parameters:</td></tr>
<tr><td>Lat=32.277815, Lon=3.986690 deg.</td><td>Tavg=1657.94 K, RHsum=2.81563 MW</td></tr>
<tr><td>Freq. detect.=87.55 %</td><td>Area=16.49 m2</td></tr>
<tr><td>BCM=0.0771</td><td>Type: upstream</td></tr>
</table>]]></description><Point>
<coordinates>3.986690,32.277815,0</coordinates>
</Point>
</Placemark>
<Placemark>
<Style id="highlightPlacemark449">
<IconStyle>
<scale>0.75</scale>
<Icon>
<href>http://maps.google.com/mapfiles/kml/shapes/gas_stations.png</href>
</Icon>
</IconStyle>
<LabelStyle>
<scale>0</scale>
</LabelStyle>
</Style>
<name>Rank 449</name>
<description><![CDATA[  <table width="500">
<tr><td>Country: <b>VEN</b></td><td>Flare ID: <b>vnfdb_2012_05916</b></td></tr>
<tr><td colspan="2">Combustion parameters:</td></tr>
<tr><td>Lat=10.079249, Lon=-64.865191 deg.</td><td>Tavg=1705.38 K, RHsum=2.80481 MW</td></tr>
<tr><td>Freq. detect.=97.99 %</td><td>Area=12.31 m2</td></tr>
<tr><td>BCM=0.0769</td><td>Type: downstream</td></tr>
</table>]]></description><Point>
<coordinates>-64.865191,10.079249,0</coordinates>
</Point>
</Placemark>
<Placemark>
<Style id="highlightPlacemark450">
<IconStyle>
<scale>0.75</scale>
<Icon>
<href>http://maps.google.com/mapfiles/kml/shapes/firedept.png</href>
</Icon>
</IconStyle>
<LabelStyle>
<scale>0</scale>
</LabelStyle>
</Style>
<name>Rank 450</name>
<description><![CDATA[  <table width="500">
<tr><td>Country: <b>YEM</b></td><td>Flare ID: <b>vnfdb_2012_08828</b></td></tr>
<tr><td colspan="2">Combustion parameters:</td></tr>
<tr><td>Lat=13.986529, Lon=48.176999 deg.</td><td>Tavg=1657.98 K, RHsum=2.8015 MW</td></tr>
<tr><td>Freq. detect.=90.25 %</td><td>Area=21.15 m2</td></tr>
<tr><td>BCM=0.0768</td><td>Type: LNG</td></tr>
</table>]]></description><Point>
<coordinates>48.176999,13.986529,0</coordinates>
</Point>
</Placemark>
<Placemark>
<Style id="highlightPlacemark451">
<IconStyle>
<scale>0.75</scale>
<Icon>
<href>http://maps.google.com/mapfiles/ms/micons/red.png</href>
</Icon>
</IconStyle>
<LabelStyle>
<scale>0</scale>
</LabelStyle>
</Style>
<name>Rank 451</name>
<description><![CDATA[  <table width="500">
<tr><td>Country: <b>RUS</b></td><td>Flare ID: <b>vnfdb_2012_07478</b></td></tr>
<tr><td colspan="2">Combustion parameters:</td></tr>
<tr><td>Lat=51.871665, Lon=54.742221 deg.</td><td>Tavg=1685.36 K, RHsum=2.79328 MW</td></tr>
<tr><td>Freq. detect.=91.17 %</td><td>Area=12.88 m2</td></tr>
<tr><td>BCM=0.0765</td><td>Type: upstream</td></tr>
</table>]]></description><Point>
<coordinates>54.742221,51.871665,0</coordinates>
</Point>
</Placemark>
<Placemark>
<Style id="highlightPlacemark452">
<IconStyle>
<scale>0.75</scale>
<Icon>
<href>http://maps.google.com/mapfiles/ms/micons/red.png</href>
</Icon>
</IconStyle>
<LabelStyle>
<scale>0</scale>
</LabelStyle>
</Style>
<name>Rank 452</name>
<description><![CDATA[  <table width="500">
<tr><td>Country: <b>AGO</b></td><td>Flare ID: <b>vnfdb_2012_09881</b></td></tr>
<tr><td colspan="2">Combustion parameters:</td></tr>
<tr><td>Lat=-7.589668, Lon=12.110007 deg.</td><td>Tavg=1620.36 K, RHsum=2.79159 MW</td></tr>
<tr><td>Freq. detect.=81.41 %</td><td>Area=21.74 m2</td></tr>
<tr><td>BCM=0.0765</td><td>Type: upstream</td></tr>
</table>]]></description><Point>
<coordinates>12.110007,-7.589668,0</coordinates>
</Point>
</Placemark>
<Placemark>
<Style id="highlightPlacemark453">
<IconStyle>
<scale>0.75</scale>
<Icon>
<href>http://maps.google.com/mapfiles/ms/micons/red.png</href>
</Icon>
</IconStyle>
<LabelStyle>
<scale>0</scale>
</LabelStyle>
</Style>
<name>Rank 453</name>
<description><![CDATA[  <table width="500">
<tr><td>Country: <b>RUS</b></td><td>Flare ID: <b>vnfdb_2012_07203</b></td></tr>
<tr><td colspan="2">Combustion parameters:</td></tr>
<tr><td>Lat=50.718536, Lon=46.040790 deg.</td><td>Tavg=1782.9 K, RHsum=2.78711 MW</td></tr>
<tr><td>Freq. detect.=91.62 %</td><td>Area=8.60 m2</td></tr>
<tr><td>BCM=0.0764</td><td>Type: upstream</td></tr>
</table>]]></description><Point>
<coordinates>46.040790,50.718536,0</coordinates>
</Point>
</Placemark>
<Placemark>
<Style id="highlightPlacemark454">
<IconStyle>
<scale>0.75</scale>
<Icon>
<href>http://maps.google.com/mapfiles/ms/micons/red.png</href>
</Icon>
</IconStyle>
<LabelStyle>
<scale>0</scale>
</LabelStyle>
</Style>
<name>Rank 454</name>
<description><![CDATA[  <table width="500">
<tr><td>Country: <b>VEN</b></td><td>Flare ID: <b>vnfdb_2012_05996</b></td></tr>
<tr><td colspan="2">Combustion parameters:</td></tr>
<tr><td>Lat=9.699918, Lon=-63.463987 deg.</td><td>Tavg=1814.68 K, RHsum=2.78175 MW</td></tr>
<tr><td>Freq. detect.=93.47 %</td><td>Area=8.75 m2</td></tr>
<tr><td>BCM=0.0762</td><td>Type: upstream</td></tr>
</table>]]></description><Point>
<coordinates>-63.463987,9.699918,0</coordinates>
</Point>
</Placemark>
<Placemark>
<Style id="highlightPlacemark455">
<IconStyle>
<scale>0.75</scale>
<Icon>
<href>http://maps.google.com/mapfiles/ms/micons/red.png</href>
</Icon>
</IconStyle>
<LabelStyle>
<scale>0</scale>
</LabelStyle>
</Style>
<name>Rank 455</name>
<description><![CDATA[  <table width="500">
<tr><td>Country: <b>COG</b></td><td>Flare ID: <b>vnfdb_2012_09835</b></td></tr>
<tr><td colspan="2">Combustion parameters:</td></tr>
<tr><td>Lat=-4.922762, Lon=11.381079 deg.</td><td>Tavg=1646.51 K, RHsum=2.7761 MW</td></tr>
<tr><td>Freq. detect.=97.57 %</td><td>Area=14.43 m2</td></tr>
<tr><td>BCM=0.0761</td><td>Type: upstream</td></tr>
</table>]]></description><Point>
<coordinates>11.381079,-4.922762,0</coordinates>
</Point>
</Placemark>
<Placemark>
<Style id="highlightPlacemark456">
<IconStyle>
<scale>0.75</scale>
<Icon>
<href>http://maps.google.com/mapfiles/ms/micons/red.png</href>
</Icon>
</IconStyle>
<LabelStyle>
<scale>0</scale>
</LabelStyle>
</Style>
<name>Rank 456</name>
<description><![CDATA[  <table width="500">
<tr><td>Country: <b>VEN</b></td><td>Flare ID: <b>vnfdb_2012_05955</b></td></tr>
<tr><td colspan="2">Combustion parameters:</td></tr>
<tr><td>Lat=8.908709, Lon=-63.803137 deg.</td><td>Tavg=1709.2 K, RHsum=2.77187 MW</td></tr>
<tr><td>Freq. detect.=95.31 %</td><td>Area=13.12 m2</td></tr>
<tr><td>BCM=0.0759</td><td>Type: upstream</td></tr>
</table>]]></description><Point>
<coordinates>-63.803137,8.908709,0</coordinates>
</Point>
</Placemark>
<Placemark>
<Style id="highlightPlacemark457">
<IconStyle>
<scale>0.75</scale>
<Icon>
<href>http://maps.google.com/mapfiles/ms/micons/red.png</href>
</Icon>
</IconStyle>
<LabelStyle>
<scale>0</scale>
</LabelStyle>
</Style>
<name>Rank 457</name>
<description><![CDATA[  <table width="500">
<tr><td>Country: <b>MYS</b></td><td>Flare ID: <b>vnfdb_2012_11943</b></td></tr>
<tr><td colspan="2">Combustion parameters:</td></tr>
<tr><td>Lat=5.448369, Lon=105.379649 deg.</td><td>Tavg=1558.55 K, RHsum=2.77038 MW</td></tr>
<tr><td>Freq. detect.=89.27 %</td><td>Area=25.34 m2</td></tr>
<tr><td>BCM=0.0759</td><td>Type: upstream</td></tr>
</table>]]></description><Point>
<coordinates>105.379649,5.448369,0</coordinates>
</Point>
</Placemark>
<Placemark>
<Style id="highlightPlacemark458">
<IconStyle>
<scale>0.75</scale>
<Icon>
<href>http://maps.google.com/mapfiles/kml/shapes/firedept.png</href>
</Icon>
</IconStyle>
<LabelStyle>
<scale>0</scale>
</LabelStyle>
</Style>
<name>Rank 458</name>
<description><![CDATA[  <table width="500">
<tr><td>Country: <b>QAT</b></td><td>Flare ID: <b>vnfdb_2012_09221</b></td></tr>
<tr><td colspan="2">Combustion parameters:</td></tr>
<tr><td>Lat=25.918426, Lon=51.566162 deg.</td><td>Tavg=1542 K, RHsum=2.76902 MW</td></tr>
<tr><td>Freq. detect.=95.34 %</td><td>Area=23.03 m2</td></tr>
<tr><td>BCM=0.0759</td><td>Type: LNG</td></tr>
</table>]]></description><Point>
<coordinates>51.566162,25.918426,0</coordinates>
</Point>
</Placemark>
<Placemark>
<Style id="highlightPlacemark459">
<IconStyle>
<scale>0.75</scale>
<Icon>
<href>http://maps.google.com/mapfiles/ms/micons/red.png</href>
</Icon>
</IconStyle>
<LabelStyle>
<scale>0</scale>
</LabelStyle>
</Style>
<name>Rank 459</name>
<description><![CDATA[  <table width="500">
<tr><td>Country: <b>RUS</b></td><td>Flare ID: <b>vnfdb_2012_10844</b></td></tr>
<tr><td colspan="2">Combustion parameters:</td></tr>
<tr><td>Lat=63.725811, Lon=77.713303 deg.</td><td>Tavg=1789.5 K, RHsum=2.76558 MW</td></tr>
<tr><td>Freq. detect.=67.23 %</td><td>Area=9.23 m2</td></tr>
<tr><td>BCM=0.0758</td><td>Type: upstream</td></tr>
</table>]]></description><Point>
<coordinates>77.713303,63.725811,0</coordinates>
</Point>
</Placemark>
<Placemark>
<Style id="highlightPlacemark460">
<IconStyle>
<scale>0.75</scale>
<Icon>
<href>http://maps.google.com/mapfiles/ms/micons/red.png</href>
</Icon>
</IconStyle>
<LabelStyle>
<scale>0</scale>
</LabelStyle>
</Style>
<name>Rank 460</name>
<description><![CDATA[  <table width="500">
<tr><td>Country: <b>AGO</b></td><td>Flare ID: <b>vnfdb_2012_09895</b></td></tr>
<tr><td colspan="2">Combustion parameters:</td></tr>
<tr><td>Lat=-6.422225, Lon=12.306892 deg.</td><td>Tavg=1660.29 K, RHsum=2.76295 MW</td></tr>
<tr><td>Freq. detect.=80.00 %</td><td>Area=16.22 m2</td></tr>
<tr><td>BCM=0.0757</td><td>Type: upstream</td></tr>
</table>]]></description><Point>
<coordinates>12.306892,-6.422225,0</coordinates>
</Point>
</Placemark>
<Placemark>
<Style id="highlightPlacemark461">
<IconStyle>
<scale>0.75</scale>
<Icon>
<href>http://maps.google.com/mapfiles/kml/shapes/firedept.png</href>
</Icon>
</IconStyle>
<LabelStyle>
<scale>0</scale>
</LabelStyle>
</Style>
<name>Rank 461</name>
<description><![CDATA[  <table width="500">
<tr><td>Country: <b>AGO</b></td><td>Flare ID: <b>vnfdb_2012_09898</b></td></tr>
<tr><td colspan="2">Combustion parameters:</td></tr>
<tr><td>Lat=-6.119691, Lon=12.342345 deg.</td><td>Tavg=1596.69 K, RHsum=2.75826 MW</td></tr>
<tr><td>Freq. detect.=66.10 %</td><td>Area=24.90 m2</td></tr>
<tr><td>BCM=0.0756</td><td>Type: LNG</td></tr>
</table>]]></description><Point>
<coordinates>12.342345,-6.119691,0</coordinates>
</Point>
</Placemark>
<Placemark>
<Style id="highlightPlacemark462">
<IconStyle>
<scale>0.75</scale>
<Icon>
<href>http://maps.google.com/mapfiles/ms/micons/red.png</href>
</Icon>
</IconStyle>
<LabelStyle>
<scale>0</scale>
</LabelStyle>
</Style>
<name>Rank 462</name>
<description><![CDATA[  <table width="500">
<tr><td>Country: <b>USA</b></td><td>Flare ID: <b>vnfdb_2012_03485</b></td></tr>
<tr><td colspan="2">Combustion parameters:</td></tr>
<tr><td>Lat=31.645134, Lon=-101.767139 deg.</td><td>Tavg=1775.09 K, RHsum=2.74849 MW</td></tr>
<tr><td>Freq. detect.=29.80 %</td><td>Area=17.54 m2</td></tr>
<tr><td>BCM=0.0753</td><td>Type: upstream</td></tr>
</table>]]></description><Point>
<coordinates>-101.767139,31.645134,0</coordinates>
</Point>
</Placemark>
<Placemark>
<Style id="highlightPlacemark463">
<IconStyle>
<scale>0.75</scale>
<Icon>
<href>http://maps.google.com/mapfiles/ms/micons/red.png</href>
</Icon>
</IconStyle>
<LabelStyle>
<scale>0</scale>
</LabelStyle>
</Style>
<name>Rank 463</name>
<description><![CDATA[  <table width="500">
<tr><td>Country: <b>MEX</b></td><td>Flare ID: <b>vnfdb_2012_05572</b></td></tr>
<tr><td colspan="2">Combustion parameters:</td></tr>
<tr><td>Lat=18.066827, Lon=-93.311494 deg.</td><td>Tavg=1645.58 K, RHsum=2.74585 MW</td></tr>
<tr><td>Freq. detect.=91.52 %</td><td>Area=13.82 m2</td></tr>
<tr><td>BCM=0.0752</td><td>Type: upstream</td></tr>
</table>]]></description><Point>
<coordinates>-93.311494,18.066827,0</coordinates>
</Point>
</Placemark>
<Placemark>
<Style id="highlightPlacemark464">
<IconStyle>
<scale>0.75</scale>
<Icon>
<href>http://maps.google.com/mapfiles/kml/shapes/gas_stations.png</href>
</Icon>
</IconStyle>
<LabelStyle>
<scale>0</scale>
</LabelStyle>
</Style>
<name>Rank 464</name>
<description><![CDATA[  <table width="500">
<tr><td>Country: <b>IRN</b></td><td>Flare ID: <b>vnfdb_2012_09319</b></td></tr>
<tr><td colspan="2">Combustion parameters:</td></tr>
<tr><td>Lat=26.795790, Lon=53.343658 deg.</td><td>Tavg=1692.38 K, RHsum=2.74064 MW</td></tr>
<tr><td>Freq. detect.=93.18 %</td><td>Area=12.17 m2</td></tr>
<tr><td>BCM=0.0751</td><td>Type: downstream</td></tr>
</table>]]></description><Point>
<coordinates>53.343658,26.795790,0</coordinates>
</Point>
</Placemark>
<Placemark>
<Style id="highlightPlacemark465">
<IconStyle>
<scale>0.75</scale>
<Icon>
<href>http://maps.google.com/mapfiles/kml/shapes/gas_stations.png</href>
</Icon>
</IconStyle>
<LabelStyle>
<scale>0</scale>
</LabelStyle>
</Style>
<name>Rank 465</name>
<description><![CDATA[  <table width="500">
<tr><td>Country: <b>QAT</b></td><td>Flare ID: <b>vnfdb_2012_09275</b></td></tr>
<tr><td colspan="2">Combustion parameters:</td></tr>
<tr><td>Lat=25.670938, Lon=52.403853 deg.</td><td>Tavg=1745.56 K, RHsum=2.73464 MW</td></tr>
<tr><td>Freq. detect.=90.83 %</td><td>Area=11.98 m2</td></tr>
<tr><td>BCM=0.0749</td><td>Type: downstream</td></tr>
</table>]]></description><Point>
<coordinates>52.403853,25.670938,0</coordinates>
</Point>
</Placemark>
<Placemark>
<Style id="highlightPlacemark466">
<IconStyle>
<scale>0.75</scale>
<Icon>
<href>http://maps.google.com/mapfiles/ms/micons/red.png</href>
</Icon>
</IconStyle>
<LabelStyle>
<scale>0</scale>
</LabelStyle>
</Style>
<name>Rank 466</name>
<description><![CDATA[  <table width="500">
<tr><td>Country: <b>IRQ</b></td><td>Flare ID: <b>vnfdb_2012_08593</b></td></tr>
<tr><td colspan="2">Combustion parameters:</td></tr>
<tr><td>Lat=35.419412, Lon=44.219031 deg.</td><td>Tavg=1699.94 K, RHsum=2.7304 MW</td></tr>
<tr><td>Freq. detect.=95.24 %</td><td>Area=11.05 m2</td></tr>
<tr><td>BCM=0.0748</td><td>Type: upstream</td></tr>
</table>]]></description><Point>
<coordinates>44.219031,35.419412,0</coordinates>
</Point>
</Placemark>
<Placemark>
<Style id="highlightPlacemark467">
<IconStyle>
<scale>0.75</scale>
<Icon>
<href>http://maps.google.com/mapfiles/ms/micons/red.png</href>
</Icon>
</IconStyle>
<LabelStyle>
<scale>0</scale>
</LabelStyle>
</Style>
<name>Rank 467</name>
<description><![CDATA[  <table width="500">
<tr><td>Country: <b>TLS</b></td><td>Flare ID: <b>vnfdb_2012_13028</b></td></tr>
<tr><td colspan="2">Combustion parameters:</td></tr>
<tr><td>Lat=-11.065237, Lon=126.612348 deg.</td><td>Tavg=1712.13 K, RHsum=2.72806 MW</td></tr>
<tr><td>Freq. detect.=82.85 %</td><td>Area=19.41 m2</td></tr>
<tr><td>BCM=0.0747</td><td>Type: upstream</td></tr>
</table>]]></description><Point>
<coordinates>126.612348,-11.065237,0</coordinates>
</Point>
</Placemark>
<Placemark>
<Style id="highlightPlacemark468">
<IconStyle>
<scale>0.75</scale>
<Icon>
<href>http://maps.google.com/mapfiles/kml/shapes/firedept.png</href>
</Icon>
</IconStyle>
<LabelStyle>
<scale>0</scale>
</LabelStyle>
</Style>
<name>Rank 468</name>
<description><![CDATA[  <table width="500">
<tr><td>Country: <b>IDN</b></td><td>Flare ID: <b>vnfdb_2012_12721</b></td></tr>
<tr><td colspan="2">Combustion parameters:</td></tr>
<tr><td>Lat=0.107161, Lon=117.470425 deg.</td><td>Tavg=1591.9 K, RHsum=2.72769 MW</td></tr>
<tr><td>Freq. detect.=95.52 %</td><td>Area=18.12 m2</td></tr>
<tr><td>BCM=0.0747</td><td>Type: LNG</td></tr>
</table>]]></description><Point>
<coordinates>117.470425,0.107161,0</coordinates>
</Point>
</Placemark>
<Placemark>
<Style id="highlightPlacemark469">
<IconStyle>
<scale>0.75</scale>
<Icon>
<href>http://maps.google.com/mapfiles/ms/micons/red.png</href>
</Icon>
</IconStyle>
<LabelStyle>
<scale>0</scale>
</LabelStyle>
</Style>
<name>Rank 469</name>
<description><![CDATA[  <table width="500">
<tr><td>Country: <b>KAZ</b></td><td>Flare ID: <b>vnfdb_2012_07550</b></td></tr>
<tr><td colspan="2">Combustion parameters:</td></tr>
<tr><td>Lat=48.114669, Lon=56.670587 deg.</td><td>Tavg=1838.09 K, RHsum=2.72277 MW</td></tr>
<tr><td>Freq. detect.=91.27 %</td><td>Area=7.15 m2</td></tr>
<tr><td>BCM=0.0746</td><td>Type: upstream</td></tr>
</table>]]></description><Point>
<coordinates>56.670587,48.114669,0</coordinates>
</Point>
</Placemark>
<Placemark>
<Style id="highlightPlacemark470">
<IconStyle>
<scale>0.75</scale>
<Icon>
<href>http://maps.google.com/mapfiles/ms/micons/red.png</href>
</Icon>
</IconStyle>
<LabelStyle>
<scale>0</scale>
</LabelStyle>
</Style>
<name>Rank 470</name>
<description><![CDATA[  <table width="500">
<tr><td>Country: <b>IRQ</b></td><td>Flare ID: <b>vnfdb_2012_08585</b></td></tr>
<tr><td colspan="2">Combustion parameters:</td></tr>
<tr><td>Lat=35.729833, Lon=44.032448 deg.</td><td>Tavg=1674.14 K, RHsum=2.71473 MW</td></tr>
<tr><td>Freq. detect.=94.22 %</td><td>Area=12.70 m2</td></tr>
<tr><td>BCM=0.0744</td><td>Type: upstream</td></tr>
</table>]]></description><Point>
<coordinates>44.032448,35.729833,0</coordinates>
</Point>
</Placemark>
<Placemark>
<Style id="highlightPlacemark471">
<IconStyle>
<scale>0.75</scale>
<Icon>
<href>http://maps.google.com/mapfiles/ms/micons/red.png</href>
</Icon>
</IconStyle>
<LabelStyle>
<scale>0</scale>
</LabelStyle>
</Style>
<name>Rank 471</name>
<description><![CDATA[  <table width="500">
<tr><td>Country: <b>AGO</b></td><td>Flare ID: <b>vnfdb_2012_09900</b></td></tr>
<tr><td colspan="2">Combustion parameters:</td></tr>
<tr><td>Lat=-7.127665, Lon=12.345429 deg.</td><td>Tavg=1617.47 K, RHsum=2.71281 MW</td></tr>
<tr><td>Freq. detect.=90.99 %</td><td>Area=11.99 m2</td></tr>
<tr><td>BCM=0.0743</td><td>Type: upstream</td></tr>
</table>]]></description><Point>
<coordinates>12.345429,-7.127665,0</coordinates>
</Point>
</Placemark>
<Placemark>
<Style id="highlightPlacemark472">
<IconStyle>
<scale>0.75</scale>
<Icon>
<href>http://maps.google.com/mapfiles/ms/micons/red.png</href>
</Icon>
</IconStyle>
<LabelStyle>
<scale>0</scale>
</LabelStyle>
</Style>
<name>Rank 472</name>
<description><![CDATA[  <table width="500">
<tr><td>Country: <b>RUS</b></td><td>Flare ID: <b>vnfdb_2012_07649</b></td></tr>
<tr><td colspan="2">Combustion parameters:</td></tr>
<tr><td>Lat=66.421843, Lon=58.040767 deg.</td><td>Tavg=1710.23 K, RHsum=2.70302 MW</td></tr>
<tr><td>Freq. detect.=84.30 %</td><td>Area=14.03 m2</td></tr>
<tr><td>BCM=0.0741</td><td>Type: upstream</td></tr>
</table>]]></description><Point>
<coordinates>58.040767,66.421843,0</coordinates>
</Point>
</Placemark>
<Placemark>
<Style id="highlightPlacemark473">
<IconStyle>
<scale>0.75</scale>
<Icon>
<href>http://maps.google.com/mapfiles/ms/micons/red.png</href>
</Icon>
</IconStyle>
<LabelStyle>
<scale>0</scale>
</LabelStyle>
</Style>
<name>Rank 473</name>
<description><![CDATA[  <table width="500">
<tr><td>Country: <b>IRQ</b></td><td>Flare ID: <b>vnfdb_2012_08580</b></td></tr>
<tr><td colspan="2">Combustion parameters:</td></tr>
<tr><td>Lat=35.814778, Lon=43.948274 deg.</td><td>Tavg=1734.27 K, RHsum=2.70035 MW</td></tr>
<tr><td>Freq. detect.=96.43 %</td><td>Area=9.51 m2</td></tr>
<tr><td>BCM=0.074</td><td>Type: upstream</td></tr>
</table>]]></description><Point>
<coordinates>43.948274,35.814778,0</coordinates>
</Point>
</Placemark>
<Placemark>
<Style id="highlightPlacemark474">
<IconStyle>
<scale>0.75</scale>
<Icon>
<href>http://maps.google.com/mapfiles/ms/micons/red.png</href>
</Icon>
</IconStyle>
<LabelStyle>
<scale>0</scale>
</LabelStyle>
</Style>
<name>Rank 474</name>
<description><![CDATA[  <table width="500">
<tr><td>Country: <b>IRQ</b></td><td>Flare ID: <b>vnfdb_2012_08700</b></td></tr>
<tr><td colspan="2">Combustion parameters:</td></tr>
<tr><td>Lat=32.095531, Lon=47.426305 deg.</td><td>Tavg=1628.52 K, RHsum=2.69836 MW</td></tr>
<tr><td>Freq. detect.=92.07 %</td><td>Area=14.38 m2</td></tr>
<tr><td>BCM=0.0739</td><td>Type: upstream</td></tr>
</table>]]></description><Point>
<coordinates>47.426305,32.095531,0</coordinates>
</Point>
</Placemark>
<Placemark>
<Style id="highlightPlacemark475">
<IconStyle>
<scale>0.75</scale>
<Icon>
<href>http://maps.google.com/mapfiles/ms/micons/red.png</href>
</Icon>
</IconStyle>
<LabelStyle>
<scale>0</scale>
</LabelStyle>
</Style>
<name>Rank 475</name>
<description><![CDATA[  <table width="500">
<tr><td>Country: <b>SDN</b></td><td>Flare ID: <b>vnfdb_2012_08314</b></td></tr>
<tr><td colspan="2">Combustion parameters:</td></tr>
<tr><td>Lat=11.602396, Lon=28.241382 deg.</td><td>Tavg=1690.18 K, RHsum=2.69655 MW</td></tr>
<tr><td>Freq. detect.=98.00 %</td><td>Area=13.77 m2</td></tr>
<tr><td>BCM=0.0739</td><td>Type: upstream</td></tr>
</table>]]></description><Point>
<coordinates>28.241382,11.602396,0</coordinates>
</Point>
</Placemark>
<Placemark>
<Style id="highlightPlacemark476">
<IconStyle>
<scale>0.75</scale>
<Icon>
<href>http://maps.google.com/mapfiles/ms/micons/red.png</href>
</Icon>
</IconStyle>
<LabelStyle>
<scale>0</scale>
</LabelStyle>
</Style>
<name>Rank 476</name>
<description><![CDATA[  <table width="500">
<tr><td>Country: <b>IRN</b></td><td>Flare ID: <b>vnfdb_2012_09056</b></td></tr>
<tr><td colspan="2">Combustion parameters:</td></tr>
<tr><td>Lat=28.621776, Lon=49.631234 deg.</td><td>Tavg=1664.41 K, RHsum=2.68909 MW</td></tr>
<tr><td>Freq. detect.=94.13 %</td><td>Area=13.54 m2</td></tr>
<tr><td>BCM=0.0737</td><td>Type: upstream</td></tr>
</table>]]></description><Point>
<coordinates>49.631234,28.621776,0</coordinates>
</Point>
</Placemark>
<Placemark>
<Style id="highlightPlacemark477">
<IconStyle>
<scale>0.75</scale>
<Icon>
<href>http://maps.google.com/mapfiles/kml/shapes/gas_stations.png</href>
</Icon>
</IconStyle>
<LabelStyle>
<scale>0</scale>
</LabelStyle>
</Style>
<name>Rank 477</name>
<description><![CDATA[  <table width="500">
<tr><td>Country: <b>QAT</b></td><td>Flare ID: <b>vnfdb_2012_09213</b></td></tr>
<tr><td colspan="2">Combustion parameters:</td></tr>
<tr><td>Lat=25.905162, Lon=51.507979 deg.</td><td>Tavg=1444.72 K, RHsum=2.68442 MW</td></tr>
<tr><td>Freq. detect.=97.46 %</td><td>Area=28.06 m2</td></tr>
<tr><td>BCM=0.0736</td><td>Type: downstream</td></tr>
</table>]]></description><Point>
<coordinates>51.507979,25.905162,0</coordinates>
</Point>
</Placemark>
<Placemark>
<Style id="highlightPlacemark478">
<IconStyle>
<scale>0.75</scale>
<Icon>
<href>http://maps.google.com/mapfiles/ms/micons/red.png</href>
</Icon>
</IconStyle>
<LabelStyle>
<scale>0</scale>
</LabelStyle>
</Style>
<name>Rank 478</name>
<description><![CDATA[  <table width="500">
<tr><td>Country: <b>CMR</b></td><td>Flare ID: <b>vnfdb_2012_09744</b></td></tr>
<tr><td colspan="2">Combustion parameters:</td></tr>
<tr><td>Lat=4.286850, Lon=8.454775 deg.</td><td>Tavg=1694.42 K, RHsum=2.68283 MW</td></tr>
<tr><td>Freq. detect.=93.57 %</td><td>Area=11.86 m2</td></tr>
<tr><td>BCM=0.0735</td><td>Type: upstream</td></tr>
</table>]]></description><Point>
<coordinates>8.454775,4.286850,0</coordinates>
</Point>
</Placemark>
<Placemark>
<Style id="highlightPlacemark479">
<IconStyle>
<scale>0.75</scale>
<Icon>
<href>http://maps.google.com/mapfiles/ms/micons/red.png</href>
</Icon>
</IconStyle>
<LabelStyle>
<scale>0</scale>
</LabelStyle>
</Style>
<name>Rank 479</name>
<description><![CDATA[  <table width="500">
<tr><td>Country: <b>DZA</b></td><td>Flare ID: <b>vnfdb_2012_07704</b></td></tr>
<tr><td colspan="2">Combustion parameters:</td></tr>
<tr><td>Lat=32.948274, Lon=3.227965 deg.</td><td>Tavg=1643.83 K, RHsum=2.67869 MW</td></tr>
<tr><td>Freq. detect.=98.26 %</td><td>Area=14.39 m2</td></tr>
<tr><td>BCM=0.0734</td><td>Type: upstream</td></tr>
</table>]]></description><Point>
<coordinates>3.227965,32.948274,0</coordinates>
</Point>
</Placemark>
<Placemark>
<Style id="highlightPlacemark480">
<IconStyle>
<scale>0.75</scale>
<Icon>
<href>http://maps.google.com/mapfiles/ms/micons/red.png</href>
</Icon>
</IconStyle>
<LabelStyle>
<scale>0</scale>
</LabelStyle>
</Style>
<name>Rank 480</name>
<description><![CDATA[  <table width="500">
<tr><td>Country: <b>CIV</b></td><td>Flare ID: <b>vnfdb_2012_06427</b></td></tr>
<tr><td colspan="2">Combustion parameters:</td></tr>
<tr><td>Lat=5.040928, Lon=-4.450135 deg.</td><td>Tavg=1679.49 K, RHsum=2.67777 MW</td></tr>
<tr><td>Freq. detect.=90.14 %</td><td>Area=13.97 m2</td></tr>
<tr><td>BCM=0.0734</td><td>Type: upstream</td></tr>
</table>]]></description><Point>
<coordinates>-4.450135,5.040928,0</coordinates>
</Point>
</Placemark>
<Placemark>
<Style id="highlightPlacemark481">
<IconStyle>
<scale>0.75</scale>
<Icon>
<href>http://maps.google.com/mapfiles/ms/micons/red.png</href>
</Icon>
</IconStyle>
<LabelStyle>
<scale>0</scale>
</LabelStyle>
</Style>
<name>Rank 481</name>
<description><![CDATA[  <table width="500">
<tr><td>Country: <b>LBY</b></td><td>Flare ID: <b>vnfdb_2012_08237</b></td></tr>
<tr><td colspan="2">Combustion parameters:</td></tr>
<tr><td>Lat=28.372720, Lon=21.939670 deg.</td><td>Tavg=1596.5 K, RHsum=2.67746 MW</td></tr>
<tr><td>Freq. detect.=89.56 %</td><td>Area=16.05 m2</td></tr>
<tr><td>BCM=0.0734</td><td>Type: upstream</td></tr>
</table>]]></description><Point>
<coordinates>21.939670,28.372720,0</coordinates>
</Point>
</Placemark>
<Placemark>
<Style id="highlightPlacemark482">
<IconStyle>
<scale>0.75</scale>
<Icon>
<href>http://maps.google.com/mapfiles/ms/micons/red.png</href>
</Icon>
</IconStyle>
<LabelStyle>
<scale>0</scale>
</LabelStyle>
</Style>
<name>Rank 482</name>
<description><![CDATA[  <table width="500">
<tr><td>Country: <b>IRQ</b></td><td>Flare ID: <b>vnfdb_2012_08606</b></td></tr>
<tr><td colspan="2">Combustion parameters:</td></tr>
<tr><td>Lat=35.513292, Lon=44.372899 deg.</td><td>Tavg=1720.7 K, RHsum=2.66991 MW</td></tr>
<tr><td>Freq. detect.=93.79 %</td><td>Area=11.86 m2</td></tr>
<tr><td>BCM=0.0732</td><td>Type: upstream</td></tr>
</table>]]></description><Point>
<coordinates>44.372899,35.513292,0</coordinates>
</Point>
</Placemark>
<Placemark>
<Style id="highlightPlacemark483">
<IconStyle>
<scale>0.75</scale>
<Icon>
<href>http://maps.google.com/mapfiles/ms/micons/red.png</href>
</Icon>
</IconStyle>
<LabelStyle>
<scale>0</scale>
</LabelStyle>
</Style>
<name>Rank 483</name>
<description><![CDATA[  <table width="500">
<tr><td>Country: <b>IRQ</b></td><td>Flare ID: <b>vnfdb_2012_08613</b></td></tr>
<tr><td colspan="2">Combustion parameters:</td></tr>
<tr><td>Lat=36.008717, Lon=44.519605 deg.</td><td>Tavg=1684.5 K, RHsum=2.66641 MW</td></tr>
<tr><td>Freq. detect.=94.96 %</td><td>Area=11.51 m2</td></tr>
<tr><td>BCM=0.0731</td><td>Type: upstream</td></tr>
</table>]]></description><Point>
<coordinates>44.519605,36.008717,0</coordinates>
</Point>
</Placemark>
<Placemark>
<Style id="highlightPlacemark484">
<IconStyle>
<scale>0.75</scale>
<Icon>
<href>http://maps.google.com/mapfiles/ms/micons/red.png</href>
</Icon>
</IconStyle>
<LabelStyle>
<scale>0</scale>
</LabelStyle>
</Style>
<name>Rank 484</name>
<description><![CDATA[  <table width="500">
<tr><td>Country: <b>NGA</b></td><td>Flare ID: <b>vnfdb_2012_07855</b></td></tr>
<tr><td colspan="2">Combustion parameters:</td></tr>
<tr><td>Lat=5.435175, Lon=5.883851 deg.</td><td>Tavg=1594.77 K, RHsum=2.66436 MW</td></tr>
<tr><td>Freq. detect.=91.44 %</td><td>Area=16.73 m2</td></tr>
<tr><td>BCM=0.073</td><td>Type: upstream</td></tr>
</table>]]></description><Point>
<coordinates>5.883851,5.435175,0</coordinates>
</Point>
</Placemark>
<Placemark>
<Style id="highlightPlacemark485">
<IconStyle>
<scale>0.75</scale>
<Icon>
<href>http://maps.google.com/mapfiles/ms/micons/red.png</href>
</Icon>
</IconStyle>
<LabelStyle>
<scale>0</scale>
</LabelStyle>
</Style>
<name>Rank 485</name>
<description><![CDATA[  <table width="500">
<tr><td>Country: <b>AGO</b></td><td>Flare ID: <b>vnfdb_2012_09876</b></td></tr>
<tr><td colspan="2">Combustion parameters:</td></tr>
<tr><td>Lat=-5.352611, Lon=12.075253 deg.</td><td>Tavg=1673.27 K, RHsum=2.66249 MW</td></tr>
<tr><td>Freq. detect.=99.29 %</td><td>Area=11.59 m2</td></tr>
<tr><td>BCM=0.073</td><td>Type: upstream</td></tr>
</table>]]></description><Point>
<coordinates>12.075253,-5.352611,0</coordinates>
</Point>
</Placemark>
<Placemark>
<Style id="highlightPlacemark486">
<IconStyle>
<scale>0.75</scale>
<Icon>
<href>http://maps.google.com/mapfiles/ms/micons/red.png</href>
</Icon>
</IconStyle>
<LabelStyle>
<scale>0</scale>
</LabelStyle>
</Style>
<name>Rank 486</name>
<description><![CDATA[  <table width="500">
<tr><td>Country: <b>LBY</b></td><td>Flare ID: <b>vnfdb_2012_08137</b></td></tr>
<tr><td colspan="2">Combustion parameters:</td></tr>
<tr><td>Lat=33.892699, Lon=12.604253 deg.</td><td>Tavg=1595.1 K, RHsum=2.65987 MW</td></tr>
<tr><td>Freq. detect.=95.77 %</td><td>Area=14.05 m2</td></tr>
<tr><td>BCM=0.0729</td><td>Type: upstream</td></tr>
</table>]]></description><Point>
<coordinates>12.604253,33.892699,0</coordinates>
</Point>
</Placemark>
<Placemark>
<Style id="highlightPlacemark487">
<IconStyle>
<scale>0.75</scale>
<Icon>
<href>http://maps.google.com/mapfiles/ms/micons/red.png</href>
</Icon>
</IconStyle>
<LabelStyle>
<scale>0</scale>
</LabelStyle>
</Style>
<name>Rank 487</name>
<description><![CDATA[  <table width="500">
<tr><td>Country: <b>NGA</b></td><td>Flare ID: <b>vnfdb_2012_07781</b></td></tr>
<tr><td colspan="2">Combustion parameters:</td></tr>
<tr><td>Lat=5.857107, Lon=5.133923 deg.</td><td>Tavg=1748.09 K, RHsum=2.65471 MW</td></tr>
<tr><td>Freq. detect.=82.69 %</td><td>Area=12.60 m2</td></tr>
<tr><td>BCM=0.0727</td><td>Type: upstream</td></tr>
</table>]]></description><Point>
<coordinates>5.133923,5.857107,0</coordinates>
</Point>
</Placemark>
<Placemark>
<Style id="highlightPlacemark488">
<IconStyle>
<scale>0.75</scale>
<Icon>
<href>http://maps.google.com/mapfiles/ms/micons/red.png</href>
</Icon>
</IconStyle>
<LabelStyle>
<scale>0</scale>
</LabelStyle>
</Style>
<name>Rank 488</name>
<description><![CDATA[  <table width="500">
<tr><td>Country: <b>NGA</b></td><td>Flare ID: <b>vnfdb_2012_09571</b></td></tr>
<tr><td colspan="2">Combustion parameters:</td></tr>
<tr><td>Lat=4.401498, Lon=6.645709 deg.</td><td>Tavg=1593.59 K, RHsum=2.65246 MW</td></tr>
<tr><td>Freq. detect.=79.45 %</td><td>Area=15.62 m2</td></tr>
<tr><td>BCM=0.0727</td><td>Type: upstream</td></tr>
</table>]]></description><Point>
<coordinates>6.645709,4.401498,0</coordinates>
</Point>
</Placemark>
<Placemark>
<Style id="highlightPlacemark489">
<IconStyle>
<scale>0.75</scale>
<Icon>
<href>http://maps.google.com/mapfiles/ms/micons/red.png</href>
</Icon>
</IconStyle>
<LabelStyle>
<scale>0</scale>
</LabelStyle>
</Style>
<name>Rank 489</name>
<description><![CDATA[  <table width="500">
<tr><td>Country: <b>RUS</b></td><td>Flare ID: <b>vnfdb_2012_10368</b></td></tr>
<tr><td colspan="2">Combustion parameters:</td></tr>
<tr><td>Lat=60.381277, Lon=70.340762 deg.</td><td>Tavg=1734.9 K, RHsum=2.6516 MW</td></tr>
<tr><td>Freq. detect.=81.59 %</td><td>Area=7.19 m2</td></tr>
<tr><td>BCM=0.0727</td><td>Type: upstream</td></tr>
</table>]]></description><Point>
<coordinates>70.340762,60.381277,0</coordinates>
</Point>
</Placemark>
<Placemark>
<Style id="highlightPlacemark490">
<IconStyle>
<scale>0.75</scale>
<Icon>
<href>http://maps.google.com/mapfiles/ms/micons/red.png</href>
</Icon>
</IconStyle>
<LabelStyle>
<scale>0</scale>
</LabelStyle>
</Style>
<name>Rank 490</name>
<description><![CDATA[  <table width="500">
<tr><td>Country: <b>UZB</b></td><td>Flare ID: <b>vnfdb_2012_11478</b></td></tr>
<tr><td colspan="2">Combustion parameters:</td></tr>
<tr><td>Lat=38.941169, Lon=64.789215 deg.</td><td>Tavg=1652.8 K, RHsum=2.65082 MW</td></tr>
<tr><td>Freq. detect.=93.28 %</td><td>Area=11.00 m2</td></tr>
<tr><td>BCM=0.0726</td><td>Type: upstream</td></tr>
</table>]]></description><Point>
<coordinates>64.789215,38.941169,0</coordinates>
</Point>
</Placemark>
<Placemark>
<Style id="highlightPlacemark491">
<IconStyle>
<scale>0.75</scale>
<Icon>
<href>http://maps.google.com/mapfiles/ms/micons/red.png</href>
</Icon>
</IconStyle>
<LabelStyle>
<scale>0</scale>
</LabelStyle>
</Style>
<name>Rank 491</name>
<description><![CDATA[  <table width="500">
<tr><td>Country: <b>PAK</b></td><td>Flare ID: <b>vnfdb_2012_11574</b></td></tr>
<tr><td colspan="2">Combustion parameters:</td></tr>
<tr><td>Lat=33.267721, Lon=71.306284 deg.</td><td>Tavg=1694.38 K, RHsum=2.64962 MW</td></tr>
<tr><td>Freq. detect.=96.23 %</td><td>Area=12.73 m2</td></tr>
<tr><td>BCM=0.0726</td><td>Type: upstream</td></tr>
</table>]]></description><Point>
<coordinates>71.306284,33.267721,0</coordinates>
</Point>
</Placemark>
<Placemark>
<Style id="highlightPlacemark492">
<IconStyle>
<scale>0.75</scale>
<Icon>
<href>http://maps.google.com/mapfiles/ms/micons/red.png</href>
</Icon>
</IconStyle>
<LabelStyle>
<scale>0</scale>
</LabelStyle>
</Style>
<name>Rank 492</name>
<description><![CDATA[  <table width="500">
<tr><td>Country: <b>IRN</b></td><td>Flare ID: <b>vnfdb_2012_09069</b></td></tr>
<tr><td colspan="2">Combustion parameters:</td></tr>
<tr><td>Lat=30.835589, Lon=49.760269 deg.</td><td>Tavg=1675.29 K, RHsum=2.64935 MW</td></tr>
<tr><td>Freq. detect.=93.74 %</td><td>Area=13.45 m2</td></tr>
<tr><td>BCM=0.0726</td><td>Type: upstream</td></tr>
</table>]]></description><Point>
<coordinates>49.760269,30.835589,0</coordinates>
</Point>
</Placemark>
<Placemark>
<Style id="highlightPlacemark493">
<IconStyle>
<scale>0.75</scale>
<Icon>
<href>http://maps.google.com/mapfiles/ms/micons/red.png</href>
</Icon>
</IconStyle>
<LabelStyle>
<scale>0</scale>
</LabelStyle>
</Style>
<name>Rank 493</name>
<description><![CDATA[  <table width="500">
<tr><td>Country: <b>IRN</b></td><td>Flare ID: <b>vnfdb_2012_09058</b></td></tr>
<tr><td colspan="2">Combustion parameters:</td></tr>
<tr><td>Lat=30.901202, Lon=49.675407 deg.</td><td>Tavg=1670.9 K, RHsum=2.64735 MW</td></tr>
<tr><td>Freq. detect.=68.40 %</td><td>Area=15.07 m2</td></tr>
<tr><td>BCM=0.0725</td><td>Type: upstream</td></tr>
</table>]]></description><Point>
<coordinates>49.675407,30.901202,0</coordinates>
</Point>
</Placemark>
<Placemark>
<Style id="highlightPlacemark494">
<IconStyle>
<scale>0.75</scale>
<Icon>
<href>http://maps.google.com/mapfiles/ms/micons/red.png</href>
</Icon>
</IconStyle>
<LabelStyle>
<scale>0</scale>
</LabelStyle>
</Style>
<name>Rank 494</name>
<description><![CDATA[  <table width="500">
<tr><td>Country: <b>IRN</b></td><td>Flare ID: <b>vnfdb_2012_08986</b></td></tr>
<tr><td colspan="2">Combustion parameters:</td></tr>
<tr><td>Lat=31.899431, Lon=49.333149 deg.</td><td>Tavg=1735.78 K, RHsum=2.63596 MW</td></tr>
<tr><td>Freq. detect.=84.29 %</td><td>Area=10.61 m2</td></tr>
<tr><td>BCM=0.0722</td><td>Type: upstream</td></tr>
</table>]]></description><Point>
<coordinates>49.333149,31.899431,0</coordinates>
</Point>
</Placemark>
<Placemark>
<Style id="highlightPlacemark495">
<IconStyle>
<scale>0.75</scale>
<Icon>
<href>http://maps.google.com/mapfiles/ms/micons/red.png</href>
</Icon>
</IconStyle>
<LabelStyle>
<scale>0</scale>
</LabelStyle>
</Style>
<name>Rank 495</name>
<description><![CDATA[  <table width="500">
<tr><td>Country: <b>MYS</b></td><td>Flare ID: <b>vnfdb_2012_12305</b></td></tr>
<tr><td colspan="2">Combustion parameters:</td></tr>
<tr><td>Lat=5.564230, Lon=114.985023 deg.</td><td>Tavg=1719.78 K, RHsum=2.63471 MW</td></tr>
<tr><td>Freq. detect.=90.50 %</td><td>Area=11.64 m2</td></tr>
<tr><td>BCM=0.0722</td><td>Type: upstream</td></tr>
</table>]]></description><Point>
<coordinates>114.985023,5.564230,0</coordinates>
</Point>
</Placemark>
<Placemark>
<Style id="highlightPlacemark496">
<IconStyle>
<scale>0.75</scale>
<Icon>
<href>http://maps.google.com/mapfiles/ms/micons/red.png</href>
</Icon>
</IconStyle>
<LabelStyle>
<scale>0</scale>
</LabelStyle>
</Style>
<name>Rank 496</name>
<description><![CDATA[  <table width="500">
<tr><td>Country: <b>OMN</b></td><td>Flare ID: <b>vnfdb_2012_09421</b></td></tr>
<tr><td colspan="2">Combustion parameters:</td></tr>
<tr><td>Lat=22.782452, Lon=55.815289 deg.</td><td>Tavg=1701.52 K, RHsum=2.63318 MW</td></tr>
<tr><td>Freq. detect.=93.97 %</td><td>Area=12.02 m2</td></tr>
<tr><td>BCM=0.0721</td><td>Type: upstream</td></tr>
</table>]]></description><Point>
<coordinates>55.815289,22.782452,0</coordinates>
</Point>
</Placemark>
<Placemark>
<Style id="highlightPlacemark498">
<IconStyle>
<scale>0.75</scale>
<Icon>
<href>http://maps.google.com/mapfiles/ms/micons/red.png</href>
</Icon>
</IconStyle>
<LabelStyle>
<scale>0</scale>
</LabelStyle>
</Style>
<name>Rank 498</name>
<description><![CDATA[  <table width="500">
<tr><td>Country: <b>SYR</b></td><td>Flare ID: <b>vnfdb_2012_08488</b></td></tr>
<tr><td colspan="2">Combustion parameters:</td></tr>
<tr><td>Lat=35.303039, Lon=40.444496 deg.</td><td>Tavg=1800.05 K, RHsum=2.62373 MW</td></tr>
<tr><td>Freq. detect.=88.70 %</td><td>Area=7.51 m2</td></tr>
<tr><td>BCM=0.0719</td><td>Type: upstream</td></tr>
</table>]]></description><Point>
<coordinates>40.444496,35.303039,0</coordinates>
</Point>
</Placemark>
<Placemark>
<Style id="highlightPlacemark499">
<IconStyle>
<scale>0.75</scale>
<Icon>
<href>http://maps.google.com/mapfiles/ms/micons/red.png</href>
</Icon>
</IconStyle>
<LabelStyle>
<scale>0</scale>
</LabelStyle>
</Style>
<name>Rank 499</name>
<description><![CDATA[  <table width="500">
<tr><td>Country: <b>COG</b></td><td>Flare ID: <b>vnfdb_2012_09837</b></td></tr>
<tr><td colspan="2">Combustion parameters:</td></tr>
<tr><td>Lat=-4.746052, Lon=11.408298 deg.</td><td>Tavg=1606.1 K, RHsum=2.61586 MW</td></tr>
<tr><td>Freq. detect.=94.18 %</td><td>Area=14.48 m2</td></tr>
<tr><td>BCM=0.0717</td><td>Type: upstream</td></tr>
</table>]]></description><Point>
<coordinates>11.408298,-4.746052,0</coordinates>
</Point>
</Placemark>
<Placemark>
<Style id="highlightPlacemark500">
<IconStyle>
<scale>0.75</scale>
<Icon>
<href>http://maps.google.com/mapfiles/ms/micons/red.png</href>
</Icon>
</IconStyle>
<LabelStyle>
<scale>0</scale>
</LabelStyle>
</Style>
<name>Rank 500</name>
<description><![CDATA[  <table width="500">
<tr><td>Country: <b>IRN</b></td><td>Flare ID: <b>vnfdb_2012_09127</b></td></tr>
<tr><td colspan="2">Combustion parameters:</td></tr>
<tr><td>Lat=30.154259, Lon=50.420750 deg.</td><td>Tavg=1668.86 K, RHsum=2.61498 MW</td></tr>
<tr><td>Freq. detect.=72.70 %</td><td>Area=14.42 m2</td></tr>
<tr><td>BCM=0.0717</td><td>Type: upstream</td></tr>
</table>]]></description><Point>
<coordinates>50.420750,30.154259,0</coordinates>
</Point>
</Placemark>
<Placemark>
<Style id="highlightPlacemark501">
<IconStyle>
<scale>0.75</scale>
<Icon>
<href>http://maps.google.com/mapfiles/ms/micons/red.png</href>
</Icon>
</IconStyle>
<LabelStyle>
<scale>0</scale>
</LabelStyle>
</Style>
<name>Rank 501</name>
<description><![CDATA[  <table width="500">
<tr><td>Country: <b>OMN</b></td><td>Flare ID: <b>vnfdb_2012_09434</b></td></tr>
<tr><td colspan="2">Combustion parameters:</td></tr>
<tr><td>Lat=20.376384, Lon=55.934049 deg.</td><td>Tavg=1664.09 K, RHsum=2.61275 MW</td></tr>
<tr><td>Freq. detect.=89.46 %</td><td>Area=14.58 m2</td></tr>
<tr><td>BCM=0.0716</td><td>Type: upstream</td></tr>
</table>]]></description><Point>
<coordinates>55.934049,20.376384,0</coordinates>
</Point>
</Placemark>
<Placemark>
<Style id="highlightPlacemark502">
<IconStyle>
<scale>0.75</scale>
<Icon>
<href>http://maps.google.com/mapfiles/ms/micons/red.png</href>
</Icon>
</IconStyle>
<LabelStyle>
<scale>0</scale>
</LabelStyle>
</Style>
<name>Rank 502</name>
<description><![CDATA[  <table width="500">
<tr><td>Country: <b>MEX</b></td><td>Flare ID: <b>vnfdb_2012_05630</b></td></tr>
<tr><td colspan="2">Combustion parameters:</td></tr>
<tr><td>Lat=19.591726, Lon=-92.203302 deg.</td><td>Tavg=1704.94 K, RHsum=2.60851 MW</td></tr>
<tr><td>Freq. detect.=67.91 %</td><td>Area=13.30 m2</td></tr>
<tr><td>BCM=0.0715</td><td>Type: upstream</td></tr>
</table>]]></description><Point>
<coordinates>-92.203302,19.591726,0</coordinates>
</Point>
</Placemark>
<Placemark>
<Style id="highlightPlacemark503">
<IconStyle>
<scale>0.75</scale>
<Icon>
<href>http://maps.google.com/mapfiles/kml/shapes/gas_stations.png</href>
</Icon>
</IconStyle>
<LabelStyle>
<scale>0</scale>
</LabelStyle>
</Style>
<name>Rank 503</name>
<description><![CDATA[  <table width="500">
<tr><td>Country: <b>QAT</b></td><td>Flare ID: <b>vnfdb_2012_09220</b></td></tr>
<tr><td colspan="2">Combustion parameters:</td></tr>
<tr><td>Lat=24.914015, Lon=51.547809 deg.</td><td>Tavg=1719.61 K, RHsum=2.60195 MW</td></tr>
<tr><td>Freq. detect.=87.49 %</td><td>Area=19.09 m2</td></tr>
<tr><td>BCM=0.0713</td><td>Type: downstream</td></tr>
</table>]]></description><Point>
<coordinates>51.547809,24.914015,0</coordinates>
</Point>
</Placemark>
<Placemark>
<Style id="highlightPlacemark504">
<IconStyle>
<scale>0.75</scale>
<Icon>
<href>http://maps.google.com/mapfiles/ms/micons/red.png</href>
</Icon>
</IconStyle>
<LabelStyle>
<scale>0</scale>
</LabelStyle>
</Style>
<name>Rank 504</name>
<description><![CDATA[  <table width="500">
<tr><td>Country: <b>AZE</b></td><td>Flare ID: <b>vnfdb_2012_07303</b></td></tr>
<tr><td colspan="2">Combustion parameters:</td></tr>
<tr><td>Lat=40.054874, Lon=51.305162 deg.</td><td>Tavg=1718.25 K, RHsum=2.59693 MW</td></tr>
<tr><td>Freq. detect.=76.65 %</td><td>Area=13.29 m2</td></tr>
<tr><td>BCM=0.0712</td><td>Type: upstream</td></tr>
</table>]]></description><Point>
<coordinates>51.305162,40.054874,0</coordinates>
</Point>
</Placemark>
<Placemark>
<Style id="highlightPlacemark505">
<IconStyle>
<scale>0.75</scale>
<Icon>
<href>http://maps.google.com/mapfiles/ms/micons/red.png</href>
</Icon>
</IconStyle>
<LabelStyle>
<scale>0</scale>
</LabelStyle>
</Style>
<name>Rank 505</name>
<description><![CDATA[  <table width="500">
<tr><td>Country: <b>IRN</b></td><td>Flare ID: <b>vnfdb_2012_08933</b></td></tr>
<tr><td colspan="2">Combustion parameters:</td></tr>
<tr><td>Lat=31.251469, Lon=49.169200 deg.</td><td>Tavg=1632.38 K, RHsum=2.59015 MW</td></tr>
<tr><td>Freq. detect.=91.16 %</td><td>Area=16.51 m2</td></tr>
<tr><td>BCM=0.071</td><td>Type: upstream</td></tr>
</table>]]></description><Point>
<coordinates>49.169200,31.251469,0</coordinates>
</Point>
</Placemark>
<Placemark>
<Style id="highlightPlacemark506">
<IconStyle>
<scale>0.75</scale>
<Icon>
<href>http://maps.google.com/mapfiles/ms/micons/red.png</href>
</Icon>
</IconStyle>
<LabelStyle>
<scale>0</scale>
</LabelStyle>
</Style>
<name>Rank 506</name>
<description><![CDATA[  <table width="500">
<tr><td>Country: <b>MYS</b></td><td>Flare ID: <b>vnfdb_2012_11929</b></td></tr>
<tr><td colspan="2">Combustion parameters:</td></tr>
<tr><td>Lat=6.129315, Lon=105.019737 deg.</td><td>Tavg=1697.15 K, RHsum=2.58781 MW</td></tr>
<tr><td>Freq. detect.=88.44 %</td><td>Area=10.57 m2</td></tr>
<tr><td>BCM=0.0709</td><td>Type: upstream</td></tr>
</table>]]></description><Point>
<coordinates>105.019737,6.129315,0</coordinates>
</Point>
</Placemark>
<Placemark>
<Style id="highlightPlacemark507">
<IconStyle>
<scale>0.75</scale>
<Icon>
<href>http://maps.google.com/mapfiles/ms/micons/red.png</href>
</Icon>
</IconStyle>
<LabelStyle>
<scale>0</scale>
</LabelStyle>
</Style>
<name>Rank 507</name>
<description><![CDATA[  <table width="500">
<tr><td>Country: <b>NGA</b></td><td>Flare ID: <b>vnfdb_2012_07924</b></td></tr>
<tr><td colspan="2">Combustion parameters:</td></tr>
<tr><td>Lat=5.018859, Lon=6.298946 deg.</td><td>Tavg=1755.74 K, RHsum=2.58468 MW</td></tr>
<tr><td>Freq. detect.=58.56 %</td><td>Area=11.80 m2</td></tr>
<tr><td>BCM=0.0708</td><td>Type: upstream</td></tr>
</table>]]></description><Point>
<coordinates>6.298946,5.018859,0</coordinates>
</Point>
</Placemark>
<Placemark>
<Style id="highlightPlacemark508">
<IconStyle>
<scale>0.75</scale>
<Icon>
<href>http://maps.google.com/mapfiles/kml/shapes/gas_stations.png</href>
</Icon>
</IconStyle>
<LabelStyle>
<scale>0</scale>
</LabelStyle>
</Style>
<name>Rank 508</name>
<description><![CDATA[  <table width="500">
<tr><td>Country: <b>MEX</b></td><td>Flare ID: <b>vnfdb_2012_05440</b></td></tr>
<tr><td colspan="2">Combustion parameters:</td></tr>
<tr><td>Lat=18.102745, Lon=-94.347742 deg.</td><td>Tavg=1721.94 K, RHsum=2.58216 MW</td></tr>
<tr><td>Freq. detect.=93.07 %</td><td>Area=11.54 m2</td></tr>
<tr><td>BCM=0.0708</td><td>Type: downstream</td></tr>
</table>]]></description><Point>
<coordinates>-94.347742,18.102745,0</coordinates>
</Point>
</Placemark>
<Placemark>
<Style id="highlightPlacemark509">
<IconStyle>
<scale>0.75</scale>
<Icon>
<href>http://maps.google.com/mapfiles/ms/micons/red.png</href>
</Icon>
</IconStyle>
<LabelStyle>
<scale>0</scale>
</LabelStyle>
</Style>
<name>Rank 509</name>
<description><![CDATA[  <table width="500">
<tr><td>Country: <b>TLS</b></td><td>Flare ID: <b>vnfdb_2012_13026</b></td></tr>
<tr><td colspan="2">Combustion parameters:</td></tr>
<tr><td>Lat=-10.625015, Lon=126.165775 deg.</td><td>Tavg=1612.89 K, RHsum=2.5819 MW</td></tr>
<tr><td>Freq. detect.=91.83 %</td><td>Area=15.71 m2</td></tr>
<tr><td>BCM=0.0707</td><td>Type: upstream</td></tr>
</table>]]></description><Point>
<coordinates>126.165775,-10.625015,0</coordinates>
</Point>
</Placemark>
<Placemark>
<Style id="highlightPlacemark510">
<IconStyle>
<scale>0.75</scale>
<Icon>
<href>http://maps.google.com/mapfiles/ms/micons/red.png</href>
</Icon>
</IconStyle>
<LabelStyle>
<scale>0</scale>
</LabelStyle>
</Style>
<name>Rank 510</name>
<description><![CDATA[  <table width="500">
<tr><td>Country: <b>LBY</b></td><td>Flare ID: <b>vnfdb_2012_08242</b></td></tr>
<tr><td colspan="2">Combustion parameters:</td></tr>
<tr><td>Lat=28.696137, Lon=22.374154 deg.</td><td>Tavg=1608.27 K, RHsum=2.58113 MW</td></tr>
<tr><td>Freq. detect.=93.62 %</td><td>Area=13.23 m2</td></tr>
<tr><td>BCM=0.0707</td><td>Type: upstream</td></tr>
</table>]]></description><Point>
<coordinates>22.374154,28.696137,0</coordinates>
</Point>
</Placemark>
<Placemark>
<Style id="highlightPlacemark511">
<IconStyle>
<scale>0.75</scale>
<Icon>
<href>http://maps.google.com/mapfiles/ms/micons/red.png</href>
</Icon>
</IconStyle>
<LabelStyle>
<scale>0</scale>
</LabelStyle>
</Style>
<name>Rank 511</name>
<description><![CDATA[  <table width="500">
<tr><td>Country: <b>IRQ</b></td><td>Flare ID: <b>vnfdb_2012_08753</b></td></tr>
<tr><td colspan="2">Combustion parameters:</td></tr>
<tr><td>Lat=30.119212, Lon=47.754080 deg.</td><td>Tavg=1724.71 K, RHsum=2.56888 MW</td></tr>
<tr><td>Freq. detect.=90.67 %</td><td>Area=9.52 m2</td></tr>
<tr><td>BCM=0.0704</td><td>Type: upstream</td></tr>
</table>]]></description><Point>
<coordinates>47.754080,30.119212,0</coordinates>
</Point>
</Placemark>
<Placemark>
<Style id="highlightPlacemark512">
<IconStyle>
<scale>0.75</scale>
<Icon>
<href>http://maps.google.com/mapfiles/ms/micons/red.png</href>
</Icon>
</IconStyle>
<LabelStyle>
<scale>0</scale>
</LabelStyle>
</Style>
<name>Rank 512</name>
<description><![CDATA[  <table width="500">
<tr><td>Country: <b>RUS</b></td><td>Flare ID: <b>vnfdb_2012_07331</b></td></tr>
<tr><td colspan="2">Combustion parameters:</td></tr>
<tr><td>Lat=52.013751, Lon=51.689601 deg.</td><td>Tavg=1629.04 K, RHsum=2.55556 MW</td></tr>
<tr><td>Freq. detect.=74.10 %</td><td>Area=29.28 m2</td></tr>
<tr><td>BCM=0.07</td><td>Type: upstream</td></tr>
</table>]]></description><Point>
<coordinates>51.689601,52.013751,0</coordinates>
</Point>
</Placemark>
<Placemark>
<Style id="highlightPlacemark513">
<IconStyle>
<scale>0.75</scale>
<Icon>
<href>http://maps.google.com/mapfiles/ms/micons/red.png</href>
</Icon>
</IconStyle>
<LabelStyle>
<scale>0</scale>
</LabelStyle>
</Style>
<name>Rank 513</name>
<description><![CDATA[  <table width="500">
<tr><td>Country: <b>MEX</b></td><td>Flare ID: <b>vnfdb_2012_05633</b></td></tr>
<tr><td colspan="2">Combustion parameters:</td></tr>
<tr><td>Lat=19.523796, Lon=-92.190380 deg.</td><td>Tavg=1579.4 K, RHsum=2.55479 MW</td></tr>
<tr><td>Freq. detect.=91.83 %</td><td>Area=18.90 m2</td></tr>
<tr><td>BCM=0.07</td><td>Type: upstream</td></tr>
</table>]]></description><Point>
<coordinates>-92.190380,19.523796,0</coordinates>
</Point>
</Placemark>
<Placemark>
<Style id="highlightPlacemark514">
<IconStyle>
<scale>0.75</scale>
<Icon>
<href>http://maps.google.com/mapfiles/ms/micons/red.png</href>
</Icon>
</IconStyle>
<LabelStyle>
<scale>0</scale>
</LabelStyle>
</Style>
<name>Rank 514</name>
<description><![CDATA[  <table width="500">
<tr><td>Country: <b>MYS</b></td><td>Flare ID: <b>vnfdb_2012_12591</b></td></tr>
<tr><td colspan="2">Combustion parameters:</td></tr>
<tr><td>Lat=4.625920, Lon=104.807356 deg.</td><td>Tavg=1600.91 K, RHsum=2.54417 MW</td></tr>
<tr><td>Freq. detect.=92.36 %</td><td>Area=14.94 m2</td></tr>
<tr><td>BCM=0.0697</td><td>Type: upstream</td></tr>
</table>]]></description><Point>
<coordinates>104.807356,4.625920,0</coordinates>
</Point>
</Placemark>
<Placemark>
<Style id="highlightPlacemark515">
<IconStyle>
<scale>0.75</scale>
<Icon>
<href>http://maps.google.com/mapfiles/ms/micons/red.png</href>
</Icon>
</IconStyle>
<LabelStyle>
<scale>0</scale>
</LabelStyle>
</Style>
<name>Rank 515</name>
<description><![CDATA[  <table width="500">
<tr><td>Country: <b>CMR</b></td><td>Flare ID: <b>vnfdb_2012_09734</b></td></tr>
<tr><td colspan="2">Combustion parameters:</td></tr>
<tr><td>Lat=4.313993, Lon=8.406976 deg.</td><td>Tavg=1630.29 K, RHsum=2.54361 MW</td></tr>
<tr><td>Freq. detect.=95.00 %</td><td>Area=13.58 m2</td></tr>
<tr><td>BCM=0.0697</td><td>Type: upstream</td></tr>
</table>]]></description><Point>
<coordinates>8.406976,4.313993,0</coordinates>
</Point>
</Placemark>
<Placemark>
<Style id="highlightPlacemark516">
<IconStyle>
<scale>0.75</scale>
<Icon>
<href>http://maps.google.com/mapfiles/kml/shapes/gas_stations.png</href>
</Icon>
</IconStyle>
<LabelStyle>
<scale>0</scale>
</LabelStyle>
</Style>
<name>Rank 516</name>
<description><![CDATA[  <table width="500">
<tr><td>Country: <b>VEN</b></td><td>Flare ID: <b>vnfdb_2012_05927</b></td></tr>
<tr><td colspan="2">Combustion parameters:</td></tr>
<tr><td>Lat=10.212584, Lon=-64.615652 deg.</td><td>Tavg=1543.52 K, RHsum=2.54189 MW</td></tr>
<tr><td>Freq. detect.=96.87 %</td><td>Area=16.99 m2</td></tr>
<tr><td>BCM=0.0696</td><td>Type: downstream</td></tr>
</table>]]></description><Point>
<coordinates>-64.615652,10.212584,0</coordinates>
</Point>
</Placemark>
<Placemark>
<Style id="highlightPlacemark517">
<IconStyle>
<scale>0.75</scale>
<Icon>
<href>http://maps.google.com/mapfiles/ms/micons/red.png</href>
</Icon>
</IconStyle>
<LabelStyle>
<scale>0</scale>
</LabelStyle>
</Style>
<name>Rank 517</name>
<description><![CDATA[  <table width="500">
<tr><td>Country: <b>RUS</b></td><td>Flare ID: <b>vnfdb_2012_10426</b></td></tr>
<tr><td colspan="2">Combustion parameters:</td></tr>
<tr><td>Lat=60.500667, Lon=72.538784 deg.</td><td>Tavg=1750.41 K, RHsum=2.53723 MW</td></tr>
<tr><td>Freq. detect.=75.61 %</td><td>Area=7.84 m2</td></tr>
<tr><td>BCM=0.0695</td><td>Type: upstream</td></tr>
</table>]]></description><Point>
<coordinates>72.538784,60.500667,0</coordinates>
</Point>
</Placemark>
<Placemark>
<Style id="highlightPlacemark518">
<IconStyle>
<scale>0.75</scale>
<Icon>
<href>http://maps.google.com/mapfiles/ms/micons/red.png</href>
</Icon>
</IconStyle>
<LabelStyle>
<scale>0</scale>
</LabelStyle>
</Style>
<name>Rank 518</name>
<description><![CDATA[  <table width="500">
<tr><td>Country: <b>DZA</b></td><td>Flare ID: <b>vnfdb_2012_07713</b></td></tr>
<tr><td colspan="2">Combustion parameters:</td></tr>
<tr><td>Lat=32.402838, Lon=4.005442 deg.</td><td>Tavg=1616.47 K, RHsum=2.53296 MW</td></tr>
<tr><td>Freq. detect.=91.44 %</td><td>Area=17.24 m2</td></tr>
<tr><td>BCM=0.0694</td><td>Type: upstream</td></tr>
</table>]]></description><Point>
<coordinates>4.005442,32.402838,0</coordinates>
</Point>
</Placemark>
<Placemark>
<Style id="highlightPlacemark519">
<IconStyle>
<scale>0.75</scale>
<Icon>
<href>http://maps.google.com/mapfiles/ms/micons/red.png</href>
</Icon>
</IconStyle>
<LabelStyle>
<scale>0</scale>
</LabelStyle>
</Style>
<name>Rank 519</name>
<description><![CDATA[  <table width="500">
<tr><td>Country: <b>COL</b></td><td>Flare ID: <b>vnfdb_2012_06116</b></td></tr>
<tr><td colspan="2">Combustion parameters:</td></tr>
<tr><td>Lat=3.931717, Lon=-73.689264 deg.</td><td>Tavg=1764.6 K, RHsum=2.52978 MW</td></tr>
<tr><td>Freq. detect.=81.65 %</td><td>Area=9.82 m2</td></tr>
<tr><td>BCM=0.0693</td><td>Type: upstream</td></tr>
</table>]]></description><Point>
<coordinates>-73.689264,3.931717,0</coordinates>
</Point>
</Placemark>
<Placemark>
<Style id="highlightPlacemark520">
<IconStyle>
<scale>0.75</scale>
<Icon>
<href>http://maps.google.com/mapfiles/ms/micons/red.png</href>
</Icon>
</IconStyle>
<LabelStyle>
<scale>0</scale>
</LabelStyle>
</Style>
<name>Rank 520</name>
<description><![CDATA[  <table width="500">
<tr><td>Country: <b>YEM</b></td><td>Flare ID: <b>vnfdb_2012_08858</b></td></tr>
<tr><td colspan="2">Combustion parameters:</td></tr>
<tr><td>Lat=15.695755, Lon=48.828266 deg.</td><td>Tavg=1646.92 K, RHsum=2.52821 MW</td></tr>
<tr><td>Freq. detect.=96.18 %</td><td>Area=12.05 m2</td></tr>
<tr><td>BCM=0.0693</td><td>Type: upstream</td></tr>
</table>]]></description><Point>
<coordinates>48.828266,15.695755,0</coordinates>
</Point>
</Placemark>
<Placemark>
<Style id="highlightPlacemark521">
<IconStyle>
<scale>0.75</scale>
<Icon>
<href>http://maps.google.com/mapfiles/ms/micons/red.png</href>
</Icon>
</IconStyle>
<LabelStyle>
<scale>0</scale>
</LabelStyle>
</Style>
<name>Rank 521</name>
<description><![CDATA[  <table width="500">
<tr><td>Country: <b>MEX</b></td><td>Flare ID: <b>vnfdb_2012_05634</b></td></tr>
<tr><td colspan="2">Combustion parameters:</td></tr>
<tr><td>Lat=19.294705, Lon=-92.171250 deg.</td><td>Tavg=1624.4 K, RHsum=2.52643 MW</td></tr>
<tr><td>Freq. detect.=83.31 %</td><td>Area=19.66 m2</td></tr>
<tr><td>BCM=0.0692</td><td>Type: upstream</td></tr>
</table>]]></description><Point>
<coordinates>-92.171250,19.294705,0</coordinates>
</Point>
</Placemark>
<Placemark>
<Style id="highlightPlacemark522">
<IconStyle>
<scale>0.75</scale>
<Icon>
<href>http://maps.google.com/mapfiles/ms/micons/red.png</href>
</Icon>
</IconStyle>
<LabelStyle>
<scale>0</scale>
</LabelStyle>
</Style>
<name>Rank 522</name>
<description><![CDATA[  <table width="500">
<tr><td>Country: <b>AGO</b></td><td>Flare ID: <b>vnfdb_2012_09906</b></td></tr>
<tr><td colspan="2">Combustion parameters:</td></tr>
<tr><td>Lat=-6.213002, Lon=12.394887 deg.</td><td>Tavg=1679.82 K, RHsum=2.51851 MW</td></tr>
<tr><td>Freq. detect.=87.32 %</td><td>Area=12.63 m2</td></tr>
<tr><td>BCM=0.069</td><td>Type: upstream</td></tr>
</table>]]></description><Point>
<coordinates>12.394887,-6.213002,0</coordinates>
</Point>
</Placemark>
<Placemark>
<Style id="highlightPlacemark523">
<IconStyle>
<scale>0.75</scale>
<Icon>
<href>http://maps.google.com/mapfiles/ms/micons/red.png</href>
</Icon>
</IconStyle>
<LabelStyle>
<scale>0</scale>
</LabelStyle>
</Style>
<name>Rank 523</name>
<description><![CDATA[  <table width="500">
<tr><td>Country: <b>NGA</b></td><td>Flare ID: <b>vnfdb_2012_07758</b></td></tr>
<tr><td colspan="2">Combustion parameters:</td></tr>
<tr><td>Lat=5.916104, Lon=5.015793 deg.</td><td>Tavg=1695 K, RHsum=2.51605 MW</td></tr>
<tr><td>Freq. detect.=86.06 %</td><td>Area=11.60 m2</td></tr>
<tr><td>BCM=0.0689</td><td>Type: upstream</td></tr>
</table>]]></description><Point>
<coordinates>5.015793,5.916104,0</coordinates>
</Point>
</Placemark>
<Placemark>
<Style id="highlightPlacemark524">
<IconStyle>
<scale>0.75</scale>
<Icon>
<href>http://maps.google.com/mapfiles/ms/micons/red.png</href>
</Icon>
</IconStyle>
<LabelStyle>
<scale>0</scale>
</LabelStyle>
</Style>
<name>Rank 524</name>
<description><![CDATA[  <table width="500">
<tr><td>Country: <b>IRQ</b></td><td>Flare ID: <b>vnfdb_2012_08591</b></td></tr>
<tr><td colspan="2">Combustion parameters:</td></tr>
<tr><td>Lat=35.417213, Lon=44.190090 deg.</td><td>Tavg=1580.17 K, RHsum=2.51384 MW</td></tr>
<tr><td>Freq. detect.=89.28 %</td><td>Area=15.00 m2</td></tr>
<tr><td>BCM=0.0689</td><td>Type: upstream</td></tr>
</table>]]></description><Point>
<coordinates>44.190090,35.417213,0</coordinates>
</Point>
</Placemark>
<Placemark>
<Style id="highlightPlacemark525">
<IconStyle>
<scale>0.75</scale>
<Icon>
<href>http://maps.google.com/mapfiles/kml/shapes/gas_stations.png</href>
</Icon>
</IconStyle>
<LabelStyle>
<scale>0</scale>
</LabelStyle>
</Style>
<name>Rank 525</name>
<description><![CDATA[  <table width="500">
<tr><td>Country: <b>IRN</b></td><td>Flare ID: <b>vnfdb_2012_08832</b></td></tr>
<tr><td colspan="2">Combustion parameters:</td></tr>
<tr><td>Lat=30.348814, Lon=48.273617 deg.</td><td>Tavg=1656.12 K, RHsum=2.51202 MW</td></tr>
<tr><td>Freq. detect.=95.45 %</td><td>Area=11.53 m2</td></tr>
<tr><td>BCM=0.0688</td><td>Type: downstream</td></tr>
</table>]]></description><Point>
<coordinates>48.273617,30.348814,0</coordinates>
</Point>
</Placemark>
<Placemark>
<Style id="highlightPlacemark526">
<IconStyle>
<scale>0.75</scale>
<Icon>
<href>http://maps.google.com/mapfiles/ms/micons/red.png</href>
</Icon>
</IconStyle>
<LabelStyle>
<scale>0</scale>
</LabelStyle>
</Style>
<name>Rank 526</name>
<description><![CDATA[  <table width="500">
<tr><td>Country: <b>IDN</b></td><td>Flare ID: <b>vnfdb_2012_12517</b></td></tr>
<tr><td colspan="2">Combustion parameters:</td></tr>
<tr><td>Lat=-3.238666, Lon=103.216010 deg.</td><td>Tavg=1754.24 K, RHsum=2.5092 MW</td></tr>
<tr><td>Freq. detect.=84.93 %</td><td>Area=9.62 m2</td></tr>
<tr><td>BCM=0.0688</td><td>Type: upstream</td></tr>
</table>]]></description><Point>
<coordinates>103.216010,-3.238666,0</coordinates>
</Point>
</Placemark>
<Placemark>
<Style id="highlightPlacemark527">
<IconStyle>
<scale>0.75</scale>
<Icon>
<href>http://maps.google.com/mapfiles/ms/micons/red.png</href>
</Icon>
</IconStyle>
<LabelStyle>
<scale>0</scale>
</LabelStyle>
</Style>
<name>Rank 527</name>
<description><![CDATA[  <table width="500">
<tr><td>Country: <b>RUS</b></td><td>Flare ID: <b>vnfdb_2012_10619</b></td></tr>
<tr><td colspan="2">Combustion parameters:</td></tr>
<tr><td>Lat=62.511299, Lon=75.989468 deg.</td><td>Tavg=1780.88 K, RHsum=2.49836 MW</td></tr>
<tr><td>Freq. detect.=82.85 %</td><td>Area=9.38 m2</td></tr>
<tr><td>BCM=0.0685</td><td>Type: upstream</td></tr>
</table>]]></description><Point>
<coordinates>75.989468,62.511299,0</coordinates>
</Point>
</Placemark>
<Placemark>
<Style id="highlightPlacemark528">
<IconStyle>
<scale>0.75</scale>
<Icon>
<href>http://maps.google.com/mapfiles/ms/micons/red.png</href>
</Icon>
</IconStyle>
<LabelStyle>
<scale>0</scale>
</LabelStyle>
</Style>
<name>Rank 528</name>
<description><![CDATA[  <table width="500">
<tr><td>Country: <b>DZA</b></td><td>Flare ID: <b>vnfdb_2012_08005</b></td></tr>
<tr><td colspan="2">Combustion parameters:</td></tr>
<tr><td>Lat=28.651501, Lon=7.684809 deg.</td><td>Tavg=1705.05 K, RHsum=2.49168 MW</td></tr>
<tr><td>Freq. detect.=83.03 %</td><td>Area=11.10 m2</td></tr>
<tr><td>BCM=0.0683</td><td>Type: upstream</td></tr>
</table>]]></description><Point>
<coordinates>7.684809,28.651501,0</coordinates>
</Point>
</Placemark>
<Placemark>
<Style id="highlightPlacemark529">
<IconStyle>
<scale>0.75</scale>
<Icon>
<href>http://maps.google.com/mapfiles/ms/micons/red.png</href>
</Icon>
</IconStyle>
<LabelStyle>
<scale>0</scale>
</LabelStyle>
</Style>
<name>Rank 529</name>
<description><![CDATA[  <table width="500">
<tr><td>Country: <b>NGA</b></td><td>Flare ID: <b>vnfdb_2012_09671</b></td></tr>
<tr><td colspan="2">Combustion parameters:</td></tr>
<tr><td>Lat=4.106517, Lon=7.801413 deg.</td><td>Tavg=1726.31 K, RHsum=2.49061 MW</td></tr>
<tr><td>Freq. detect.=66.79 %</td><td>Area=12.53 m2</td></tr>
<tr><td>BCM=0.0682</td><td>Type: upstream</td></tr>
</table>]]></description><Point>
<coordinates>7.801413,4.106517,0</coordinates>
</Point>
</Placemark>
<Placemark>
<Style id="highlightPlacemark530">
<IconStyle>
<scale>0.75</scale>
<Icon>
<href>http://maps.google.com/mapfiles/ms/micons/red.png</href>
</Icon>
</IconStyle>
<LabelStyle>
<scale>0</scale>
</LabelStyle>
</Style>
<name>Rank 530</name>
<description><![CDATA[  <table width="500">
<tr><td>Country: <b>RUS</b></td><td>Flare ID: <b>vnfdb_2012_10481</b></td></tr>
<tr><td colspan="2">Combustion parameters:</td></tr>
<tr><td>Lat=62.532210, Lon=73.894103 deg.</td><td>Tavg=1732.43 K, RHsum=2.48932 MW</td></tr>
<tr><td>Freq. detect.=72.69 %</td><td>Area=14.01 m2</td></tr>
<tr><td>BCM=0.0682</td><td>Type: upstream</td></tr>
</table>]]></description><Point>
<coordinates>73.894103,62.532210,0</coordinates>
</Point>
</Placemark>
<Placemark>
<Style id="highlightPlacemark531">
<IconStyle>
<scale>0.75</scale>
<Icon>
<href>http://maps.google.com/mapfiles/ms/micons/red.png</href>
</Icon>
</IconStyle>
<LabelStyle>
<scale>0</scale>
</LabelStyle>
</Style>
<name>Rank 531</name>
<description><![CDATA[  <table width="500">
<tr><td>Country: <b>VNM</b></td><td>Flare ID: <b>vnfdb_2012_12071</b></td></tr>
<tr><td colspan="2">Combustion parameters:</td></tr>
<tr><td>Lat=7.345121, Lon=108.311253 deg.</td><td>Tavg=1726.39 K, RHsum=2.48603 MW</td></tr>
<tr><td>Freq. detect.=83.35 %</td><td>Area=10.36 m2</td></tr>
<tr><td>BCM=0.0681</td><td>Type: upstream</td></tr>
</table>]]></description><Point>
<coordinates>108.311253,7.345121,0</coordinates>
</Point>
</Placemark>
<Placemark>
<Style id="highlightPlacemark532">
<IconStyle>
<scale>0.75</scale>
<Icon>
<href>http://maps.google.com/mapfiles/ms/micons/red.png</href>
</Icon>
</IconStyle>
<LabelStyle>
<scale>0</scale>
</LabelStyle>
</Style>
<name>Rank 532</name>
<description><![CDATA[  <table width="500">
<tr><td>Country: <b>DZA</b></td><td>Flare ID: <b>vnfdb_2012_07870</b></td></tr>
<tr><td colspan="2">Combustion parameters:</td></tr>
<tr><td>Lat=31.792219, Lon=5.974150 deg.</td><td>Tavg=1723.04 K, RHsum=2.48348 MW</td></tr>
<tr><td>Freq. detect.=21.49 %</td><td>Area=20.65 m2</td></tr>
<tr><td>BCM=0.068</td><td>Type: upstream</td></tr>
</table>]]></description><Point>
<coordinates>5.974150,31.792219,0</coordinates>
</Point>
</Placemark>
<Placemark>
<Style id="highlightPlacemark533">
<IconStyle>
<scale>0.75</scale>
<Icon>
<href>http://maps.google.com/mapfiles/ms/micons/red.png</href>
</Icon>
</IconStyle>
<LabelStyle>
<scale>0</scale>
</LabelStyle>
</Style>
<name>Rank 533</name>
<description><![CDATA[  <table width="500">
<tr><td>Country: <b>TTO</b></td><td>Flare ID: <b>vnfdb_2012_06032</b></td></tr>
<tr><td colspan="2">Combustion parameters:</td></tr>
<tr><td>Lat=10.177554, Lon=-60.665868 deg.</td><td>Tavg=1643.75 K, RHsum=2.48343 MW</td></tr>
<tr><td>Freq. detect.=91.95 %</td><td>Area=12.62 m2</td></tr>
<tr><td>BCM=0.068</td><td>Type: upstream</td></tr>
</table>]]></description><Point>
<coordinates>-60.665868,10.177554,0</coordinates>
</Point>
</Placemark>
<Placemark>
<Style id="highlightPlacemark534">
<IconStyle>
<scale>0.75</scale>
<Icon>
<href>http://maps.google.com/mapfiles/ms/micons/red.png</href>
</Icon>
</IconStyle>
<LabelStyle>
<scale>0</scale>
</LabelStyle>
</Style>
<name>Rank 534</name>
<description><![CDATA[  <table width="500">
<tr><td>Country: <b>MYS</b></td><td>Flare ID: <b>vnfdb_2012_11927</b></td></tr>
<tr><td colspan="2">Combustion parameters:</td></tr>
<tr><td>Lat=5.647405, Lon=104.977740 deg.</td><td>Tavg=1550.77 K, RHsum=2.48201 MW</td></tr>
<tr><td>Freq. detect.=90.95 %</td><td>Area=17.76 m2</td></tr>
<tr><td>BCM=0.068</td><td>Type: upstream</td></tr>
</table>]]></description><Point>
<coordinates>104.977740,5.647405,0</coordinates>
</Point>
</Placemark>
<Placemark>
<Style id="highlightPlacemark535">
<IconStyle>
<scale>0.75</scale>
<Icon>
<href>http://maps.google.com/mapfiles/ms/micons/red.png</href>
</Icon>
</IconStyle>
<LabelStyle>
<scale>0</scale>
</LabelStyle>
</Style>
<name>Rank 535</name>
<description><![CDATA[  <table width="500">
<tr><td>Country: <b>LBY</b></td><td>Flare ID: <b>vnfdb_2012_08202</b></td></tr>
<tr><td colspan="2">Combustion parameters:</td></tr>
<tr><td>Lat=28.209629, Lon=19.912944 deg.</td><td>Tavg=1658.2 K, RHsum=2.48053 MW</td></tr>
<tr><td>Freq. detect.=88.35 %</td><td>Area=12.18 m2</td></tr>
<tr><td>BCM=0.068</td><td>Type: upstream</td></tr>
</table>]]></description><Point>
<coordinates>19.912944,28.209629,0</coordinates>
</Point>
</Placemark>
<Placemark>
<Style id="highlightPlacemark536">
<IconStyle>
<scale>0.75</scale>
<Icon>
<href>http://maps.google.com/mapfiles/ms/micons/red.png</href>
</Icon>
</IconStyle>
<LabelStyle>
<scale>0</scale>
</LabelStyle>
</Style>
<name>Rank 536</name>
<description><![CDATA[  <table width="500">
<tr><td>Country: <b>BRA</b></td><td>Flare ID: <b>vnfdb_2012_06135</b></td></tr>
<tr><td colspan="2">Combustion parameters:</td></tr>
<tr><td>Lat=-4.626657, Lon=-65.419145 deg.</td><td>Tavg=1806.08 K, RHsum=2.46737 MW</td></tr>
<tr><td>Freq. detect.=82.35 %</td><td>Area=7.90 m2</td></tr>
<tr><td>BCM=0.0676</td><td>Type: upstream</td></tr>
</table>]]></description><Point>
<coordinates>-65.419145,-4.626657,0</coordinates>
</Point>
</Placemark>
<Placemark>
<Style id="highlightPlacemark537">
<IconStyle>
<scale>0.75</scale>
<Icon>
<href>http://maps.google.com/mapfiles/ms/micons/red.png</href>
</Icon>
</IconStyle>
<LabelStyle>
<scale>0</scale>
</LabelStyle>
</Style>
<name>Rank 537</name>
<description><![CDATA[  <table width="500">
<tr><td>Country: <b>VNM</b></td><td>Flare ID: <b>vnfdb_2012_12015</b></td></tr>
<tr><td colspan="2">Combustion parameters:</td></tr>
<tr><td>Lat=9.555944, Lon=107.827297 deg.</td><td>Tavg=1696.48 K, RHsum=2.46558 MW</td></tr>
<tr><td>Freq. detect.=86.92 %</td><td>Area=10.37 m2</td></tr>
<tr><td>BCM=0.0676</td><td>Type: upstream</td></tr>
</table>]]></description><Point>
<coordinates>107.827297,9.555944,0</coordinates>
</Point>
</Placemark>
<Placemark>
<Style id="highlightPlacemark538">
<IconStyle>
<scale>0.75</scale>
<Icon>
<href>http://maps.google.com/mapfiles/ms/micons/red.png</href>
</Icon>
</IconStyle>
<LabelStyle>
<scale>0</scale>
</LabelStyle>
</Style>
<name>Rank 538</name>
<description><![CDATA[  <table width="500">
<tr><td>Country: <b>IDN</b></td><td>Flare ID: <b>vnfdb_2012_12735</b></td></tr>
<tr><td colspan="2">Combustion parameters:</td></tr>
<tr><td>Lat=3.485932, Lon=117.851383 deg.</td><td>Tavg=1725.66 K, RHsum=2.46009 MW</td></tr>
<tr><td>Freq. detect.=91.11 %</td><td>Area=9.31 m2</td></tr>
<tr><td>BCM=0.0674</td><td>Type: upstream</td></tr>
</table>]]></description><Point>
<coordinates>117.851383,3.485932,0</coordinates>
</Point>
</Placemark>
<Placemark>
<Style id="highlightPlacemark539">
<IconStyle>
<scale>0.75</scale>
<Icon>
<href>http://maps.google.com/mapfiles/ms/micons/red.png</href>
</Icon>
</IconStyle>
<LabelStyle>
<scale>0</scale>
</LabelStyle>
</Style>
<name>Rank 539</name>
<description><![CDATA[  <table width="500">
<tr><td>Country: <b>DZA</b></td><td>Flare ID: <b>vnfdb_2012_07897</b></td></tr>
<tr><td colspan="2">Combustion parameters:</td></tr>
<tr><td>Lat=31.815052, Lon=6.158846 deg.</td><td>Tavg=1694.45 K, RHsum=2.45399 MW</td></tr>
<tr><td>Freq. detect.=38.97 %</td><td>Area=12.92 m2</td></tr>
<tr><td>BCM=0.0672</td><td>Type: upstream</td></tr>
</table>]]></description><Point>
<coordinates>6.158846,31.815052,0</coordinates>
</Point>
</Placemark>
<Placemark>
<Style id="highlightPlacemark540">
<IconStyle>
<scale>0.75</scale>
<Icon>
<href>http://maps.google.com/mapfiles/ms/micons/red.png</href>
</Icon>
</IconStyle>
<LabelStyle>
<scale>0</scale>
</LabelStyle>
</Style>
<name>Rank 540</name>
<description><![CDATA[  <table width="500">
<tr><td>Country: <b>COG</b></td><td>Flare ID: <b>vnfdb_2012_09834</b></td></tr>
<tr><td colspan="2">Combustion parameters:</td></tr>
<tr><td>Lat=-4.723391, Lon=11.360431 deg.</td><td>Tavg=1646 K, RHsum=2.45236 MW</td></tr>
<tr><td>Freq. detect.=96.90 %</td><td>Area=12.63 m2</td></tr>
<tr><td>BCM=0.0672</td><td>Type: upstream</td></tr>
</table>]]></description><Point>
<coordinates>11.360431,-4.723391,0</coordinates>
</Point>
</Placemark>
<Placemark>
<Style id="highlightPlacemark541">
<IconStyle>
<scale>0.75</scale>
<Icon>
<href>http://maps.google.com/mapfiles/ms/micons/red.png</href>
</Icon>
</IconStyle>
<LabelStyle>
<scale>0</scale>
</LabelStyle>
</Style>
<name>Rank 541</name>
<description><![CDATA[  <table width="500">
<tr><td>Country: <b>SYR</b></td><td>Flare ID: <b>vnfdb_2012_08505</b></td></tr>
<tr><td colspan="2">Combustion parameters:</td></tr>
<tr><td>Lat=36.142184, Lon=40.815353 deg.</td><td>Tavg=1727.96 K, RHsum=2.44401 MW</td></tr>
<tr><td>Freq. detect.=89.92 %</td><td>Area=11.87 m2</td></tr>
<tr><td>BCM=0.067</td><td>Type: upstream</td></tr>
</table>]]></description><Point>
<coordinates>40.815353,36.142184,0</coordinates>
</Point>
</Placemark>
<Placemark>
<Style id="highlightPlacemark542">
<IconStyle>
<scale>0.75</scale>
<Icon>
<href>http://maps.google.com/mapfiles/ms/micons/red.png</href>
</Icon>
</IconStyle>
<LabelStyle>
<scale>0</scale>
</LabelStyle>
</Style>
<name>Rank 542</name>
<description><![CDATA[  <table width="500">
<tr><td>Country: <b>EGY</b></td><td>Flare ID: <b>vnfdb_2012_08428</b></td></tr>
<tr><td colspan="2">Combustion parameters:</td></tr>
<tr><td>Lat=27.473276, Lon=33.620618 deg.</td><td>Tavg=1780.78 K, RHsum=2.44253 MW</td></tr>
<tr><td>Freq. detect.=90.45 %</td><td>Area=7.01 m2</td></tr>
<tr><td>BCM=0.0669</td><td>Type: upstream</td></tr>
</table>]]></description><Point>
<coordinates>33.620618,27.473276,0</coordinates>
</Point>
</Placemark>
<Placemark>
<Style id="highlightPlacemark543">
<IconStyle>
<scale>0.75</scale>
<Icon>
<href>http://maps.google.com/mapfiles/kml/shapes/gas_stations.png</href>
</Icon>
</IconStyle>
<LabelStyle>
<scale>0</scale>
</LabelStyle>
</Style>
<name>Rank 543</name>
<description><![CDATA[  <table width="500">
<tr><td>Country: <b>NGA</b></td><td>Flare ID: <b>vnfdb_2012_07994</b></td></tr>
<tr><td colspan="2">Combustion parameters:</td></tr>
<tr><td>Lat=10.412244, Lon=7.492926 deg.</td><td>Tavg=1653.27 K, RHsum=2.4424 MW</td></tr>
<tr><td>Freq. detect.=81.17 %</td><td>Area=15.08 m2</td></tr>
<tr><td>BCM=0.0669</td><td>Type: downstream</td></tr>
</table>]]></description><Point>
<coordinates>7.492926,10.412244,0</coordinates>
</Point>
</Placemark>
<Placemark>
<Style id="highlightPlacemark544">
<IconStyle>
<scale>0.75</scale>
<Icon>
<href>http://maps.google.com/mapfiles/ms/micons/red.png</href>
</Icon>
</IconStyle>
<LabelStyle>
<scale>0</scale>
</LabelStyle>
</Style>
<name>Rank 544</name>
<description><![CDATA[  <table width="500">
<tr><td>Country: <b>IRQ</b></td><td>Flare ID: <b>vnfdb_2012_08608</b></td></tr>
<tr><td colspan="2">Combustion parameters:</td></tr>
<tr><td>Lat=35.459687, Lon=44.419543 deg.</td><td>Tavg=1717.61 K, RHsum=2.4399 MW</td></tr>
<tr><td>Freq. detect.=95.01 %</td><td>Area=8.65 m2</td></tr>
<tr><td>BCM=0.0669</td><td>Type: upstream</td></tr>
</table>]]></description><Point>
<coordinates>44.419543,35.459687,0</coordinates>
</Point>
</Placemark>
<Placemark>
<Style id="highlightPlacemark545">
<IconStyle>
<scale>0.75</scale>
<Icon>
<href>http://maps.google.com/mapfiles/ms/micons/red.png</href>
</Icon>
</IconStyle>
<LabelStyle>
<scale>0</scale>
</LabelStyle>
</Style>
<name>Rank 545</name>
<description><![CDATA[  <table width="500">
<tr><td>Country: <b>NGA</b></td><td>Flare ID: <b>vnfdb_2012_07752</b></td></tr>
<tr><td colspan="2">Combustion parameters:</td></tr>
<tr><td>Lat=5.872265, Lon=4.938089 deg.</td><td>Tavg=1666.26 K, RHsum=2.43743 MW</td></tr>
<tr><td>Freq. detect.=85.60 %</td><td>Area=12.21 m2</td></tr>
<tr><td>BCM=0.0668</td><td>Type: upstream</td></tr>
</table>]]></description><Point>
<coordinates>4.938089,5.872265,0</coordinates>
</Point>
</Placemark>
<Placemark>
<Style id="highlightPlacemark546">
<IconStyle>
<scale>0.75</scale>
<Icon>
<href>http://maps.google.com/mapfiles/ms/micons/red.png</href>
</Icon>
</IconStyle>
<LabelStyle>
<scale>0</scale>
</LabelStyle>
</Style>
<name>Rank 546</name>
<description><![CDATA[  <table width="500">
<tr><td>Country: <b>NGA</b></td><td>Flare ID: <b>vnfdb_2012_07793</b></td></tr>
<tr><td colspan="2">Combustion parameters:</td></tr>
<tr><td>Lat=5.536609, Lon=5.194342 deg.</td><td>Tavg=1708.17 K, RHsum=2.4338 MW</td></tr>
<tr><td>Freq. detect.=87.60 %</td><td>Area=11.18 m2</td></tr>
<tr><td>BCM=0.0667</td><td>Type: upstream</td></tr>
</table>]]></description><Point>
<coordinates>5.194342,5.536609,0</coordinates>
</Point>
</Placemark>
<Placemark>
<Style id="highlightPlacemark547">
<IconStyle>
<scale>0.75</scale>
<Icon>
<href>http://maps.google.com/mapfiles/ms/micons/red.png</href>
</Icon>
</IconStyle>
<LabelStyle>
<scale>0</scale>
</LabelStyle>
</Style>
<name>Rank 547</name>
<description><![CDATA[  <table width="500">
<tr><td>Country: <b>DZA</b></td><td>Flare ID: <b>vnfdb_2012_08016</b></td></tr>
<tr><td colspan="2">Combustion parameters:</td></tr>
<tr><td>Lat=30.663860, Lon=8.102045 deg.</td><td>Tavg=1581.05 K, RHsum=2.41965 MW</td></tr>
<tr><td>Freq. detect.=96.27 %</td><td>Area=17.81 m2</td></tr>
<tr><td>BCM=0.0663</td><td>Type: upstream</td></tr>
</table>]]></description><Point>
<coordinates>8.102045,30.663860,0</coordinates>
</Point>
</Placemark>
<Placemark>
<Style id="highlightPlacemark548">
<IconStyle>
<scale>0.75</scale>
<Icon>
<href>http://maps.google.com/mapfiles/ms/micons/red.png</href>
</Icon>
</IconStyle>
<LabelStyle>
<scale>0</scale>
</LabelStyle>
</Style>
<name>Rank 548</name>
<description><![CDATA[  <table width="500">
<tr><td>Country: <b>SDN</b></td><td>Flare ID: <b>vnfdb_2012_08327</b></td></tr>
<tr><td colspan="2">Combustion parameters:</td></tr>
<tr><td>Lat=11.324215, Lon=28.468949 deg.</td><td>Tavg=1663.45 K, RHsum=2.418 MW</td></tr>
<tr><td>Freq. detect.=97.27 %</td><td>Area=16.35 m2</td></tr>
<tr><td>BCM=0.0663</td><td>Type: upstream</td></tr>
</table>]]></description><Point>
<coordinates>28.468949,11.324215,0</coordinates>
</Point>
</Placemark>
<Placemark>
<Style id="highlightPlacemark549">
<IconStyle>
<scale>0.75</scale>
<Icon>
<href>http://maps.google.com/mapfiles/ms/micons/red.png</href>
</Icon>
</IconStyle>
<LabelStyle>
<scale>0</scale>
</LabelStyle>
</Style>
<name>Rank 549</name>
<description><![CDATA[  <table width="500">
<tr><td>Country: <b>RUS</b></td><td>Flare ID: <b>vnfdb_2012_10709</b></td></tr>
<tr><td colspan="2">Combustion parameters:</td></tr>
<tr><td>Lat=61.042669, Lon=76.748692 deg.</td><td>Tavg=1784.61 K, RHsum=2.41795 MW</td></tr>
<tr><td>Freq. detect.=76.53 %</td><td>Area=20.22 m2</td></tr>
<tr><td>BCM=0.0663</td><td>Type: upstream</td></tr>
</table>]]></description><Point>
<coordinates>76.748692,61.042669,0</coordinates>
</Point>
</Placemark>
<Placemark>
<Style id="highlightPlacemark550">
<IconStyle>
<scale>0.75</scale>
<Icon>
<href>http://maps.google.com/mapfiles/kml/shapes/firedept.png</href>
</Icon>
</IconStyle>
<LabelStyle>
<scale>0</scale>
</LabelStyle>
</Style>
<name>Rank 550</name>
[truncated: 5,094,627 more chars]
